# Supplementary material for: Ethanol as a hydrogen carrier with a value-added co-product
Source: Royal Society of Chemistry journal article supplement (doi:10.1039/d4se01524j), 2024-11-28
Supplement: d4se01524j1.pdf [file d4se01524j1.pdf]

## Supporting Information

### Ethanol as a Hydrogen Carrier with a Value-Added Co-Product

Andrew R. Rander,<sup>a</sup> Shayna R. Kohl,<sup>a</sup> Valeriy Cherepakhin,<sup>a</sup> Long Zhang,<sup>a</sup> Van K. Do,<sup>a</sup> Hanna Breunig,<sup>b</sup> and Travis J. Williams<sup>\*,a</sup>

<sup>a</sup> Donald P. and Katherine B. Loker Hydrocarbon Research Institute, Wrigley Institute for Environment and Sustainability, and the Department of Chemistry, University of Southern California, Los Angeles, California 90089-1661, USA

<sup>b</sup> Sustainable Energy Systems Group, Energy Analysis and Environmental Impacts Division Lawrence Berkeley National Lab, 1 Cyclotron Road, 90-2012, Berkeley, California, 94720, USA

\*travisw@usc.edu

### Contents

|                                                       |         |
|-------------------------------------------------------|---------|
| General Procedures                                    | S2      |
| Initial Reaction Screening Experiments and Spectra    | S3-S7   |
| Catalyst Screening Experiments and Spectra            | S8-S20  |
| Ambient Reaction Optimization Experiments and Spectra | S21-S25 |
| Large Scale Reaction of <b>10</b>                     | S26-S28 |
| Large Scale Reaction of <b>1</b>                      | S29-S30 |
| Large Scale Reaction of <b>5</b>                      | S31-S32 |
| Self-Pressurizing Reaction Optimization               | S33-S36 |
| Other Additives Reactions                             | S37-S38 |
| Acetate Hydrogenation Reactions                       | S39-S41 |
| Kinetic Data                                          | S42-S47 |
| RuMACHO-BH ( <b>10</b> ) Mechanistic Study            | S48-S51 |
| Isomers <b>10c</b> and <b>10b</b>                     | S52-S55 |
| Kinetic competence of <b>10c</b> and <b>10b</b>       | S56-S57 |
| Chlorination of Isomers                               | S58-S61 |
| Excess KOH Reaction                                   | S62-S66 |
| Treatment of <b>10</b> with t-BuOK                    | S67-S68 |
| Hetero vs. Homogenous Catalysis of <b>10</b>          | S69     |
| Mercury Drop Test                                     | S70     |
| Preparative Procedure for complex <b>5</b>            | S71-S74 |
| Preparative Procedure for complex <b>2</b>            | S75-S78 |
| Preparative Procedure for complex <b>4</b>            | S79-S82 |
| Crystal Structure of <b>5</b>                         | S83-92  |
| Crystal Structure of <b>2</b>                         | S93-S97 |
| References                                            | S98     |

## General Procedures

### I. NMR Analysis Methods

All NMR spectra were obtained on a Varian Mercury 400, Varian VNMRS 500, or VNMRS 600 using MestreLab MestReNOVA software for analysis. Chemical shifts are reported as ppm in reference to a residual  $^1\text{H}$  solvent peak.

### II. Titration Methods

To determine the quantity of potassium hydroxide remaining in each sample, back titrations using dilute hydrochloric acid (HCl) and dilute sodium hydroxide (NaOH). Samples were diluted in 50 mL of deionized water where 10 mL aliquots were portioned out and neutralized with additions of HCl in 5 mL increments. The resulting solution was then titrated with a dilute solution of NaOH where methyl orange and phenolphthalein were used as indicators. All volumes are recorded in milliliters and the following equation was used to determine the molar percentage of potassium hydroxide and acetate.

$$\text{mol \%}(\text{OH}^-) = \frac{[\text{HCl}] * V_{\text{added}} - [\text{NaOH}] * V_{\text{equivalence point 2}}}{[\text{HCl}] * V_{\text{added}} - [\text{NaOH}] * V_{\text{equivalence point 1}}} \quad \text{Equation 1}$$

$$\text{mol \%}(\text{KAc}) = 1 - \text{mol \%}(\text{OH}^-) \quad \text{Equation 2}$$

### III. General Chemical Preparation

Ethanol (200 proof) was acquired from Koptec Chemicals and both sodium and potassium hydroxide were purchased from VWR. Potassium hydroxide used in reactions was ground to a fine powder in a nitrogen filled glovebox to avoid water absorption. Potassium hydroxide was determined to be  $\text{KOH} \cdot 1/2 \text{H}_2\text{O}$  by acid-base titration. ACS grade toluene was purchased from VWR chemicals and was distilled from benzophenone ketyl and stored in a nitrogen filled box over sodium metal; sodium and benzophenone were purchased from Sigma Aldrich chemicals. Quantitative NMR was taken using dimethyl formamide (VWR chemicals) as an internal standard with a recycle delay of 30 seconds. All deuterated solvents (toluene, deuterium oxide, methanol, etc.) were obtained from Cambridge Isotope Laboratories. Complexes **7**, **8**, **10**, **11**, **12**, and **16** were obtained from Strem Chemicals. Complexes **6**, **9**, **13**, and **17** were provided by Los Alamos National Laboratory. Complexes **1**, **3**, **14**, **15**, and **18-23** were synthesized using previously reported methods. Complexes **2**, **4**, and **5** are introduced here with preparative procedures. The (pyridyl)carbene ligand for complex **5** was purchased as a silver chloride dimer from Catapower Inc. For titration analysis, methyl orange was obtained from Fischer chemicals while phenolphthalein was obtained from Sigma Aldrich.

### IV. PN-Ligand Synthesis

For complexes **2**, **4**, and **5** the (pyridyl)phosphine ligand (**L**) was synthesized using previously reported synthetic methods from Cejale et al.<sup>1</sup> Di-tertbutylchlorophosphine, 1-methyl pyridine, and the iridium-1,5-cyclooctadiene chloride dimer were all purchased from STREM chemicals, or the later was generated by recycling iridium waste.

### V. Gas Evolution and Pressure Calculations

In ambient reactions, the amount of hydrogen evolved was calculated using the ideal gas law assuming 100% conversion of ethanol to acetate and hydrogen. When run under self-pressurizing conditions, the volume of the Parr reactor was taken as 125 mL. Values of constants are listed below.

Ambient Reactions

$$P * V = n * R * T$$

$$R = 0.082 \text{ L} * \text{atm} / \text{mol} * \text{K}$$

$$T = 298 \text{ K}$$

$$P = 1 \text{ atm}$$

Self-Pressurizing Reactions

$$P * V = n * R * T$$

$$R = 0.082 \text{ L} * \text{atm} / \text{mol} * \text{K}$$

$$T = 393 \text{ K or } 353 \text{ K}$$

$$V = .125 \text{ L}$$

### Initial Reaction Screening Experiments

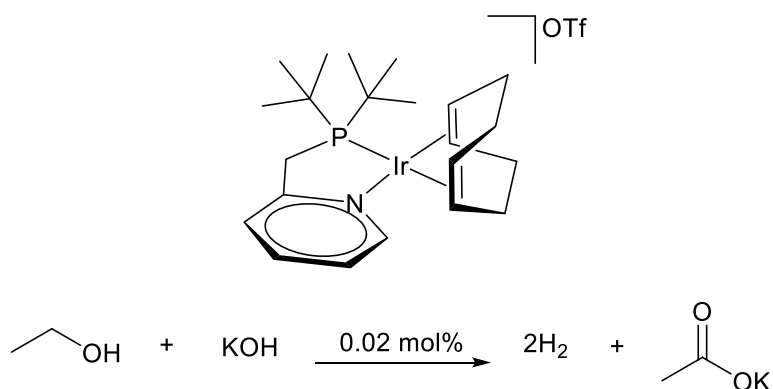

In a nitrogen filled glovebox, IrPN (**1**, 5 mg, 7.28  $\mu\text{mol}$ ) and potassium hydroxide (271 mg, 4.17 mmol) were weighed out into a 5 mL round bottom flask. To this, ethanol (200 prof, 250  $\mu\text{L}$ ) was added along with a stir bar. The resulting solution was refluxed at 90  $^{\circ}\text{C}$  for thirty minutes after which deuterium oxide (1 mL) was added to the flask and the contents were analyzed by  $^1\text{H}$  NMR. A small peak at a chemical shift of 1.90 ppm verified the presence of potassium acetate.

### Initial Reaction Screening Spectra

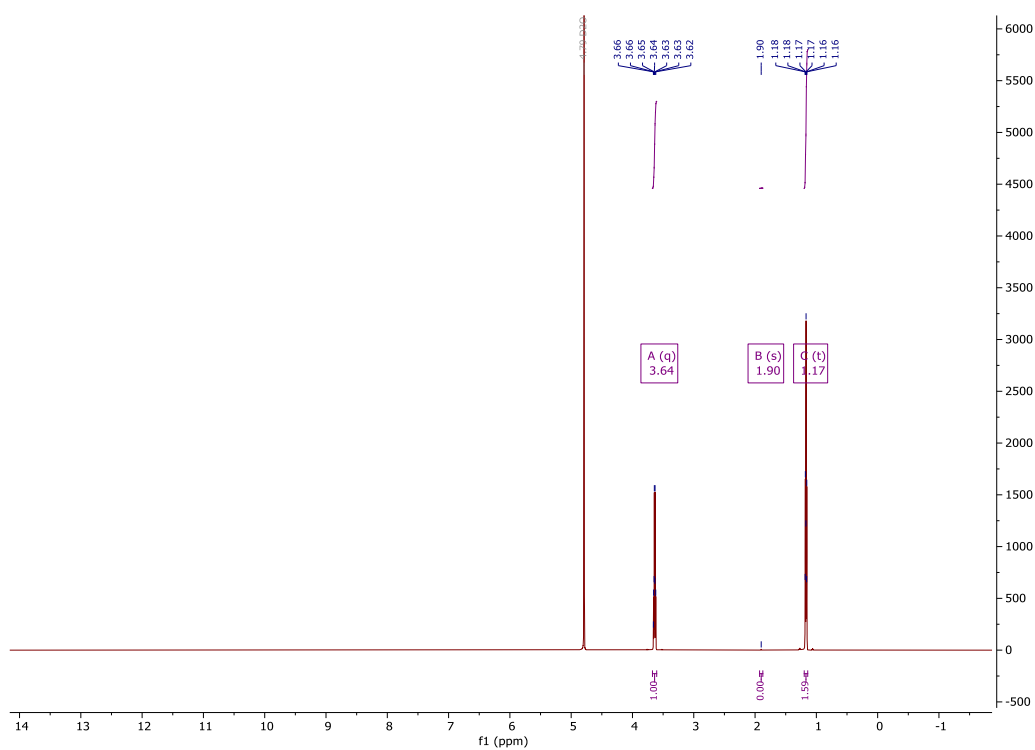

Figure S1:  $^1\text{H}$  Spectrum of reaction mixture in  $\text{D}_2\text{O}$ .

### Initial Reaction Screening Experiments cont.

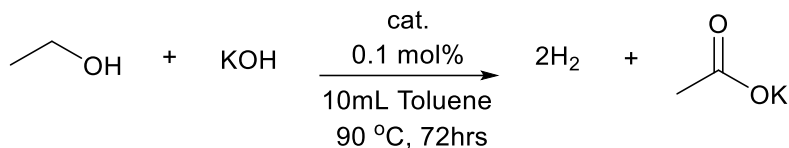

In a nitrogen filled glovebox, ground potassium hydroxide (561 mg, 8.60 mmol) was weighed out in a 25 mL round bottom flask. Next, catalyst (0.1 mol%, with respect to ethanol) was weighed out and added to the flask with dry toluene (10 mL). Finally, ethanol (200 prof, 0.60 mL, 10 mmol) was weighed in a vial and quantitatively transferred to the round bottom flask. The same procedure was duplicated for each reaction, corresponding to entries in table 1 & 2. Each reaction was refluxed under inert conditions and hydrogen evolution was quantified using a water eudiometer to determine the progress of each reaction.

**Table S1: Initial Reaction Screening Experiments**

| Entry | Catalyst | NMR Yield (AcO <sup>-</sup> ) |
|-------|----------|-------------------------------|
| 1     | 1        | 25                            |
| 2     | 3        | 34                            |

### Initial Reaction Screening Spectra Cont.

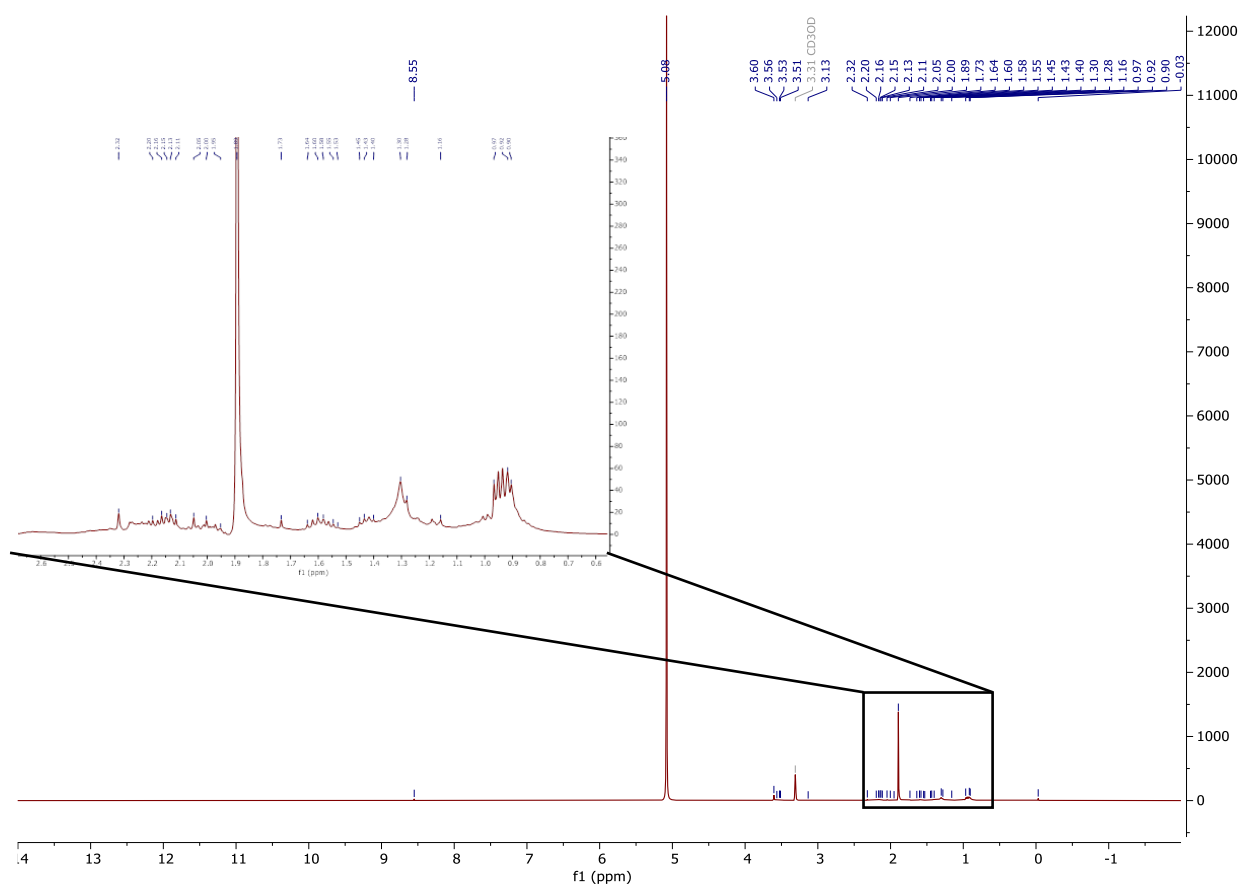

**Figure S2:** <sup>1</sup>H Spectrum of the crude reaction mixture from table S1, entry 1 in CD<sub>3</sub>OD.

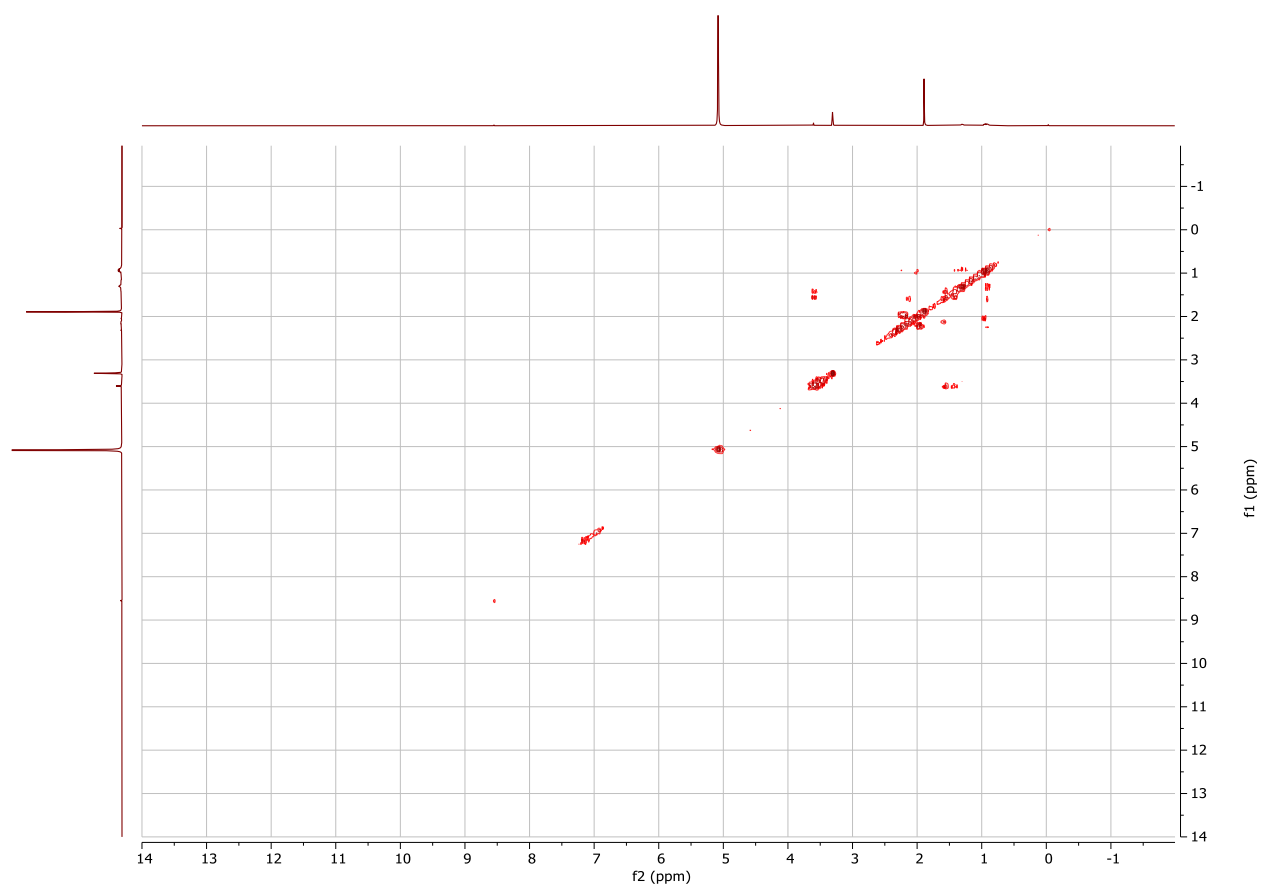

**Figure S3:**  $^1\text{H}$ - $^1\text{H}$  COSY Spectrum of the crude reaction mixture from table S1 entry 1 in  $\text{CD}_3\text{OD}$ .

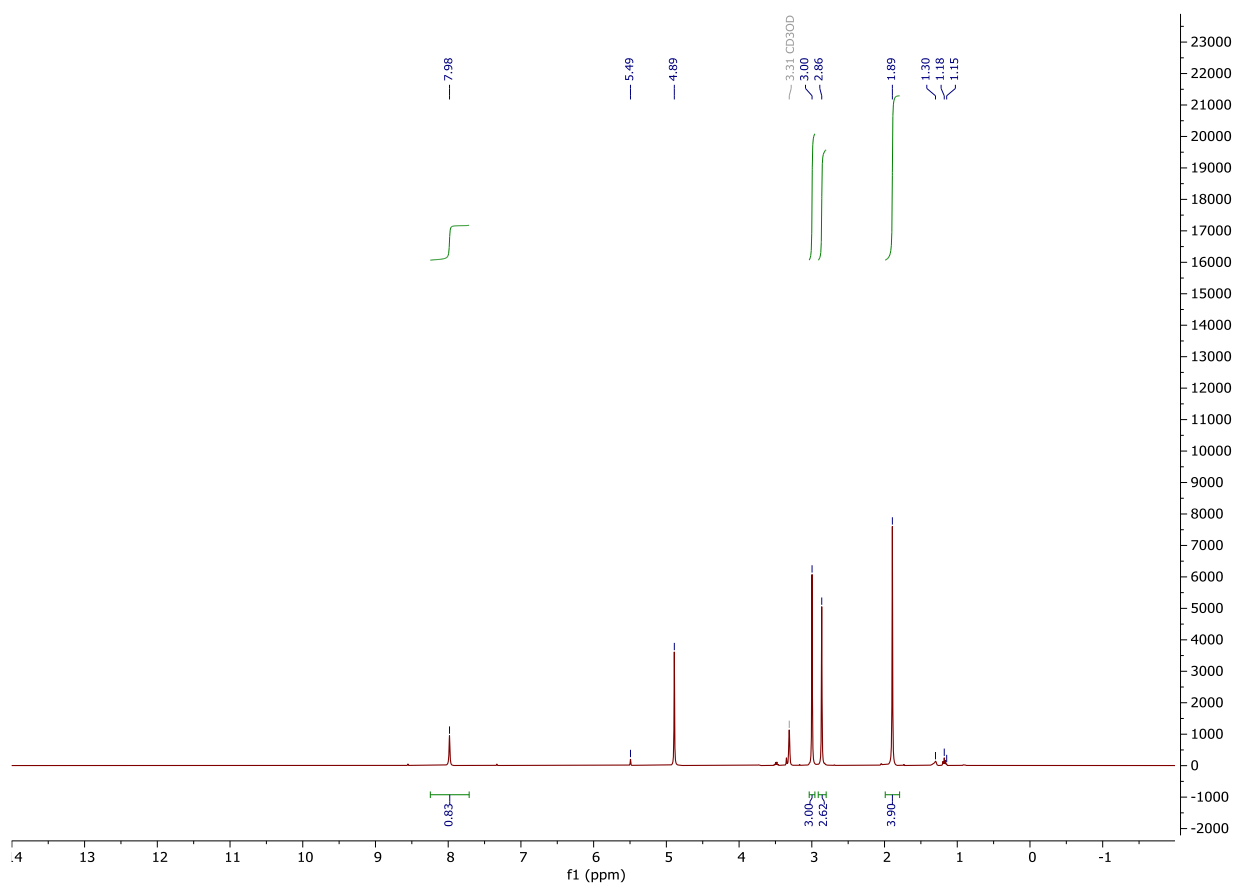

**Figure S4:** Quantitative  $^1\text{H}$  Spectrum of the crude reaction mixture from table S1, entry 1 in  $\text{CD}_3\text{OD}$ .



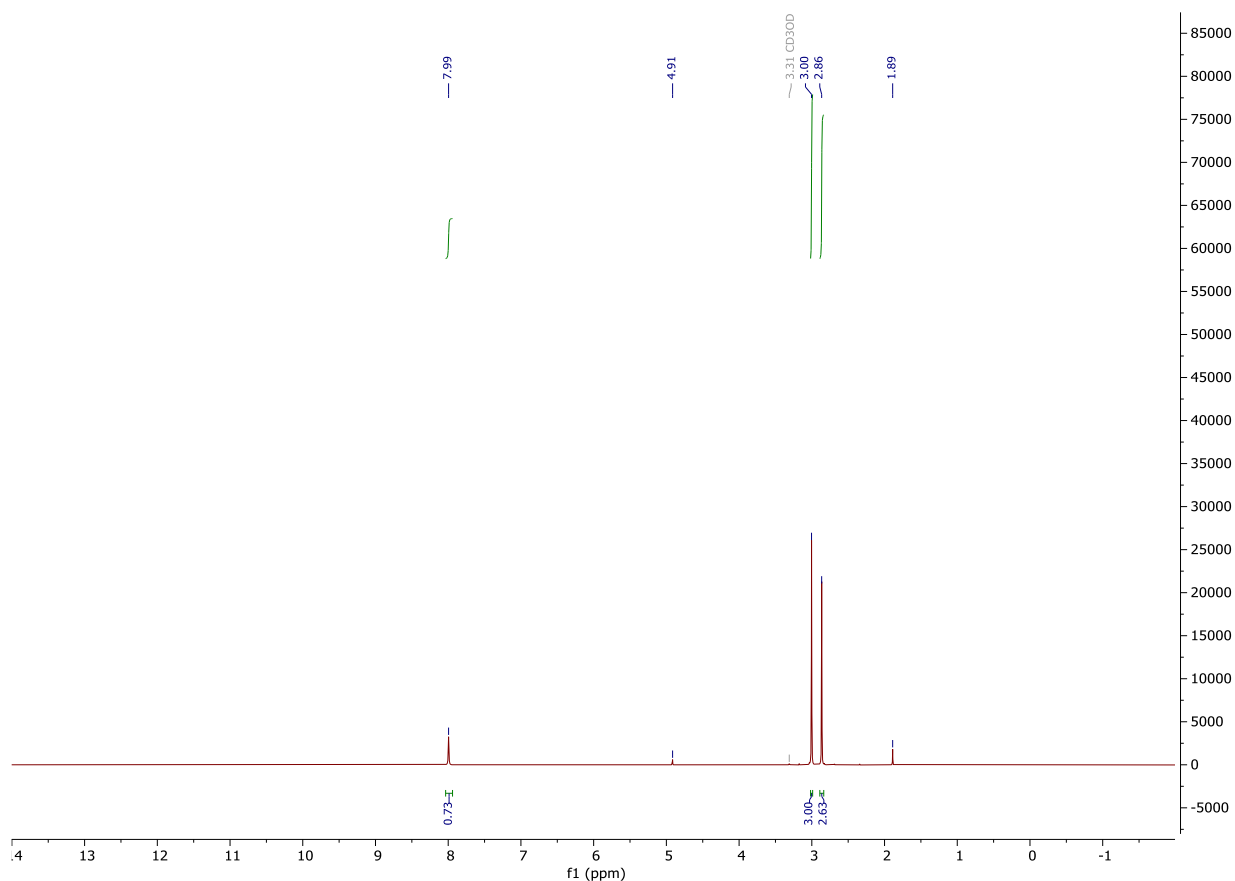

**Figure S7:** Quantitative  $^1\text{H}$  Spectrum of the crude reaction mixture from table S1, entry 2 in  $\text{CD}_3\text{OD}$ .

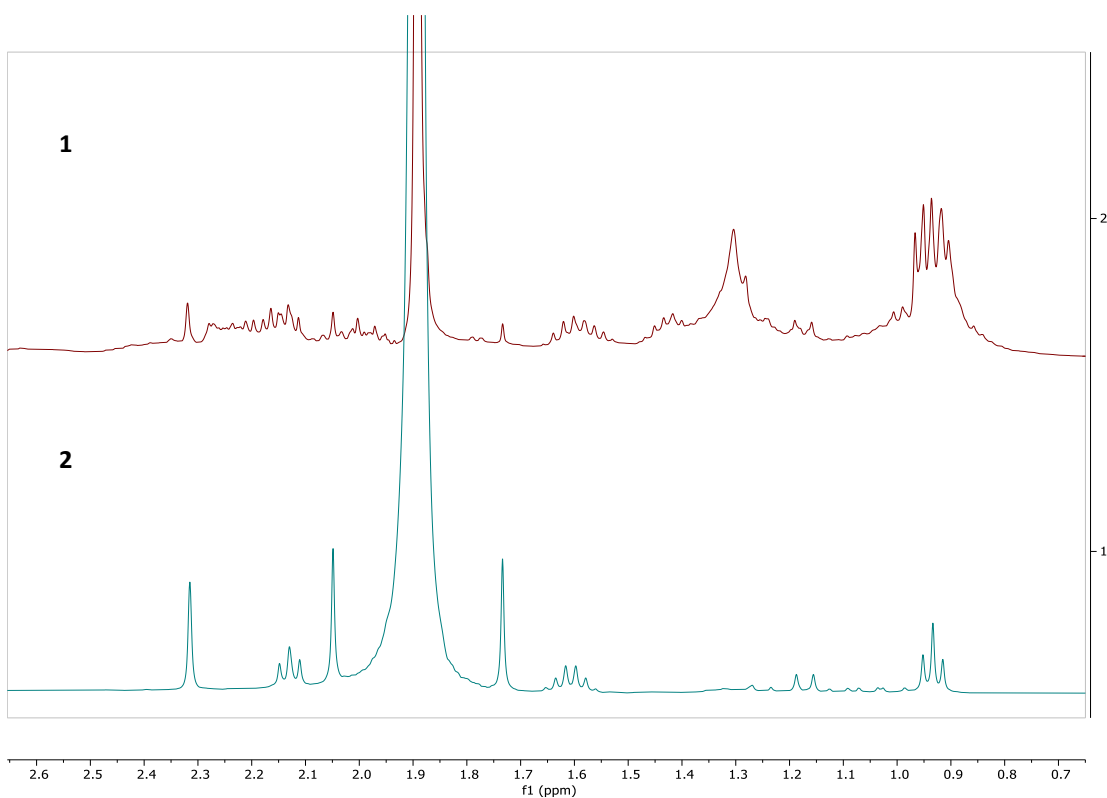

**Figure S8:** NMR analysis of initial screening of reactions involving **1** and **2**. Both spectra suggest the presence of butyrate (2.29 (t, 2H), 1.61 (tq, 2H), 0.93 (t, 3H)); however, in spectrum 1 (**1**) we see peaks at corresponding to 2-ethyl-1-butanol (3.31 (d, 2H), 1.63-1.4 (m, 5H), 0.84 (t, 6H)) the Guerbet product, as well as peaks corresponding to higher order alcohols from iterative Guerbet reactions.

### Catalyst Screening Experiments

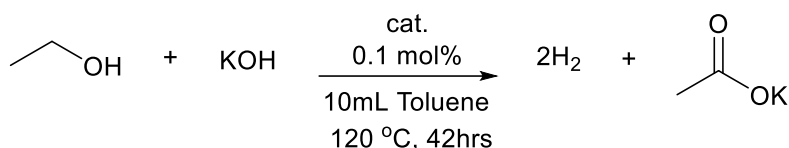

All catalyst screening reactions were run with 0.1 mol% catalyst loading with respect to ethanol. In a nitrogen filled glovebox, one equivalent of ethanol (200 proof, 0.92 g, 20 mmol) and one equivalent of potassium hydroxide (0.56 g, 23 mmol) in toluene (10 mL, distilled from benzophenone ketyl) were combined with a catalyst (0.1 mol% relative to EtOH) in a 25 mL round bottom flask. The flask was removed from the glovebox, and a condenser was attached and capped with a septum. The reaction was then heated and stirred in an oil bath. Reaction progress was monitored by water eudiometry via needle and tubing. After 42 hours, volatiles removed using a rotary evaporator under reduced pressure and quantitative NMR was recorded using dimethyl formamide as an internal standard. The remaining product was diluted in water (deionized, 50 mL) and subsequently back-titrated with hydrochloric acid (0.2657 M) and dilute sodium hydroxide (0.2556 M) solutions.

**Table S2. Results of Catalyst Screening**

| Entry | Cat. | Acetate (%) <sup>a</sup> | Anions (mol %) <sup>b</sup> |         |         |          |
|-------|------|--------------------------|-----------------------------|---------|---------|----------|
|       |      |                          | OH <sup>-</sup>             | Formate | Acetate | Butyrate |
| 1     | 1    | 10                       | 76                          | 2       | 22      | 0        |
| 2     | 2    | 29                       | 63                          | 22      | 15      | 0        |
| 3     | 3    | 26                       | 60                          | 12      | 27      | 1        |
| 4     | 4    | 37                       | 71                          | 0       | 28      | < 1      |
| 5     | 5    | 87                       | 18                          | 3       | 79      | 0        |
| 6     | 6    | 18                       | 58                          | 1       | 40      | < 1      |
| 7     | 7    | 7                        | 80                          | 1       | 19      | 0        |
| 8     | 8    | 19                       | 71                          | 1       | 28      | 0        |
| 9     | 9    | 1                        | 63                          | 2       | 35      | 0        |
| 10    | 10   | 80                       | 5                           | 3       | 90      | 1        |
| 11    | 11   | 75                       | 21                          | 7       | 71      | 1        |
| 12    | 12   | 68                       | 14                          | 3       | 83      | 0        |
| 13    | 13   | 14                       | 66                          | 0       | 32      | 2        |
| 14    | 14   | 17                       | 73                          | 1       | 26      | 0        |
| 15    | 15   | 12                       | 87                          | 1       | 11      | < 1      |
| 16    | 16   | 7                        | 64                          | 32      | 4       | 0        |
| 17    | 17   | 24                       | 56                          | 25      | 19      | 0        |
| 18    | 18   | 41                       | 51                          | 4       | 49      | 1        |
| 19    | 19   | 7                        | 61                          | 4       | 39      | 2        |
| 20    | 20   | 66                       | 37                          | 2       | 63      | < 1      |
| 21    | 21   | 8                        | 70                          | 4       | 30      | < 1      |
| 22    | 22   | 2                        | 83                          | 3       | 17      | < 1      |
| 23    | 23   | 9                        | 69                          | 3       | 31      | 5        |

<sup>a</sup>Determined by <sup>1</sup>H NMR using DMF as an internal standard. <sup>b</sup>Determined by acid-base back titration and <sup>1</sup>H NMR.



### Catalyst Screening Spectra

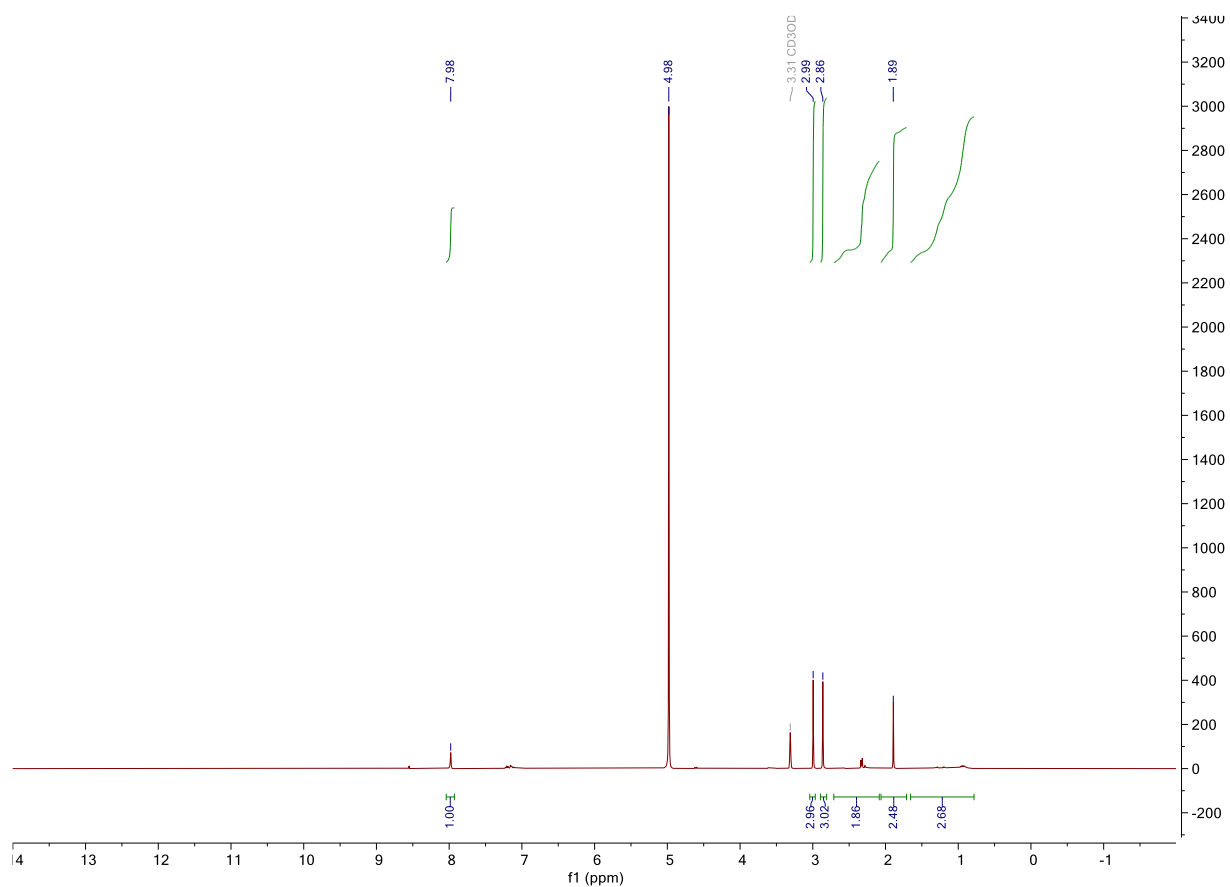

Figure S9: Quantitative <sup>1</sup>H Spectrum of product mixture for table S2, entry 1 (catalyst 1) in CD<sub>3</sub>OD.

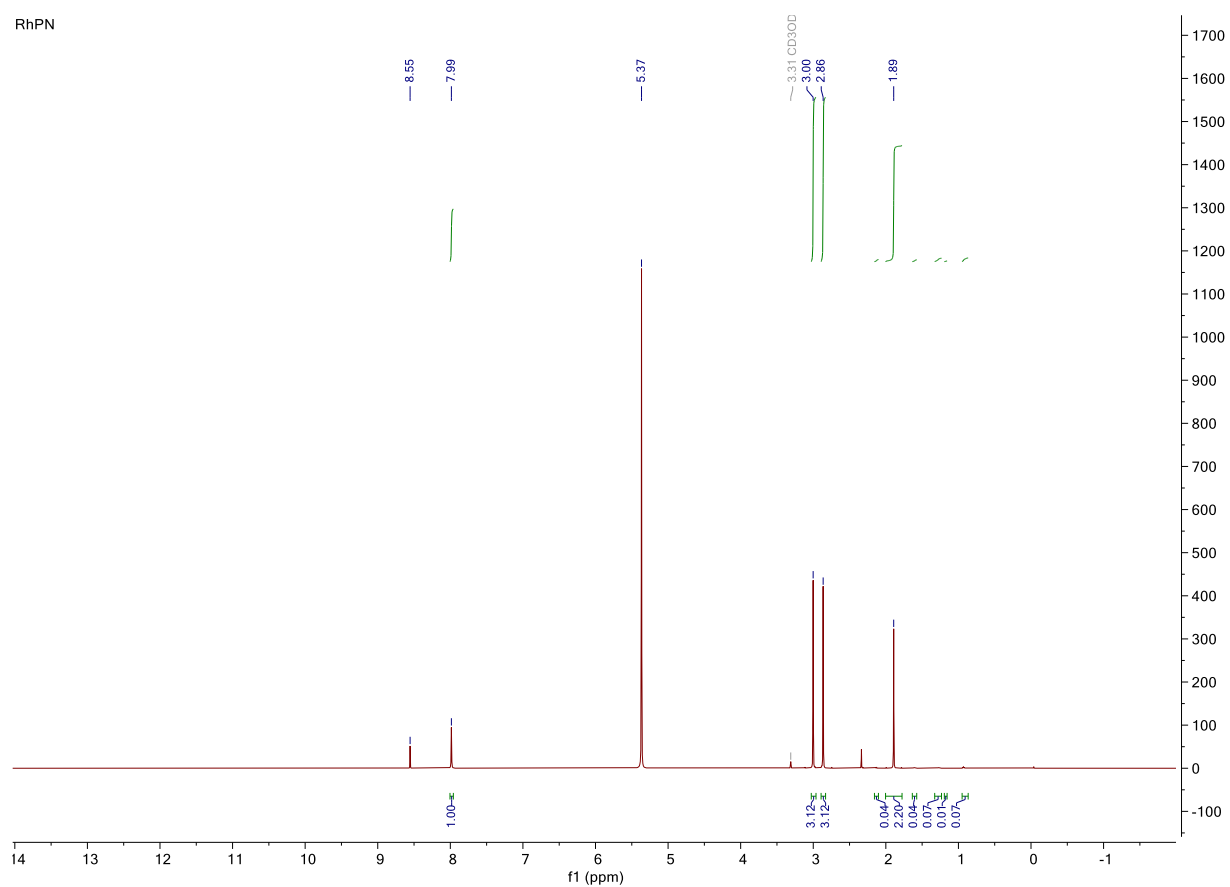

Figure S10: Quantitative <sup>1</sup>H Spectrum of product mixture for table S2, entry 2 (catalyst 2) in CD<sub>3</sub>OD.

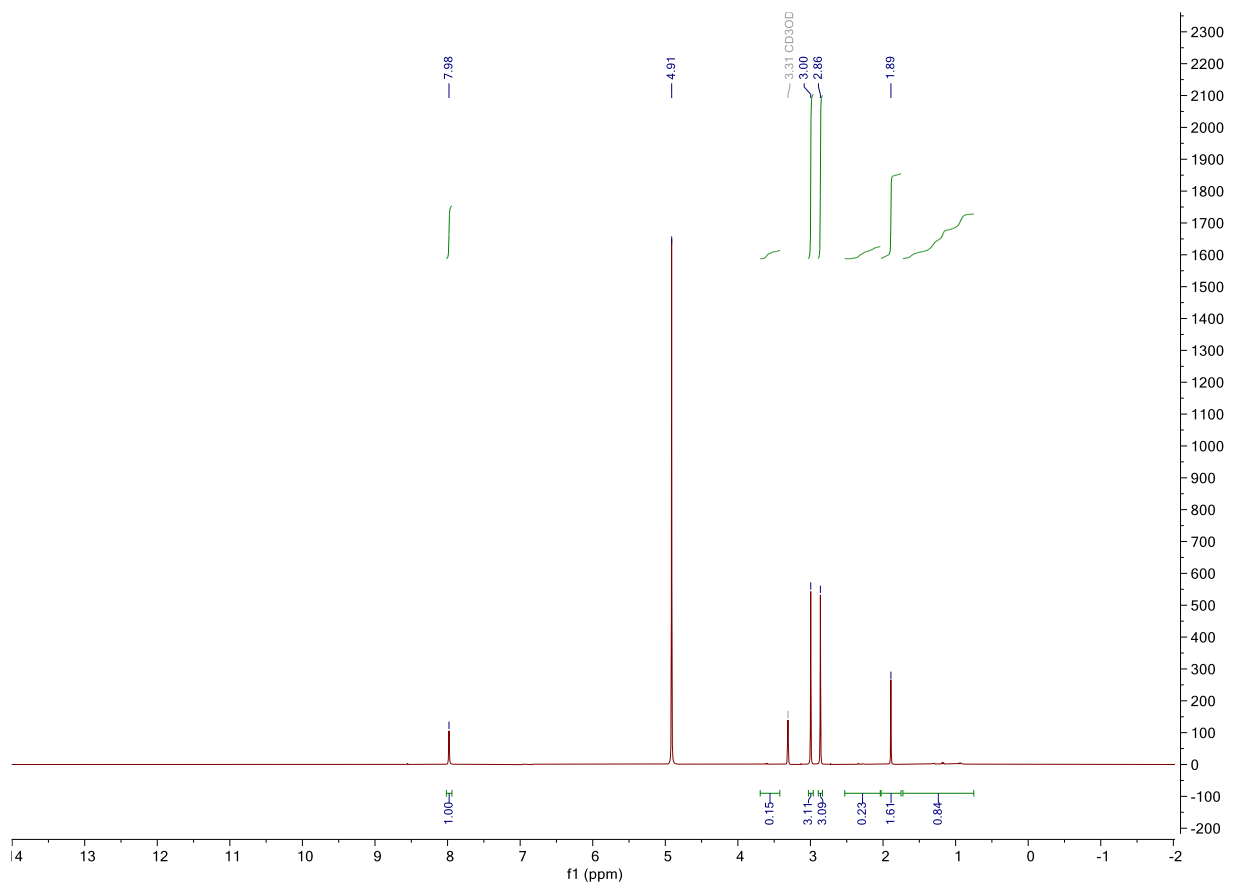

**Figure S11:** Quantitative  $^1\text{H}$  Spectrum of product mixture for table S2, entry 3 (catalyst **3**) in  $\text{CD}_3\text{OD}$ .

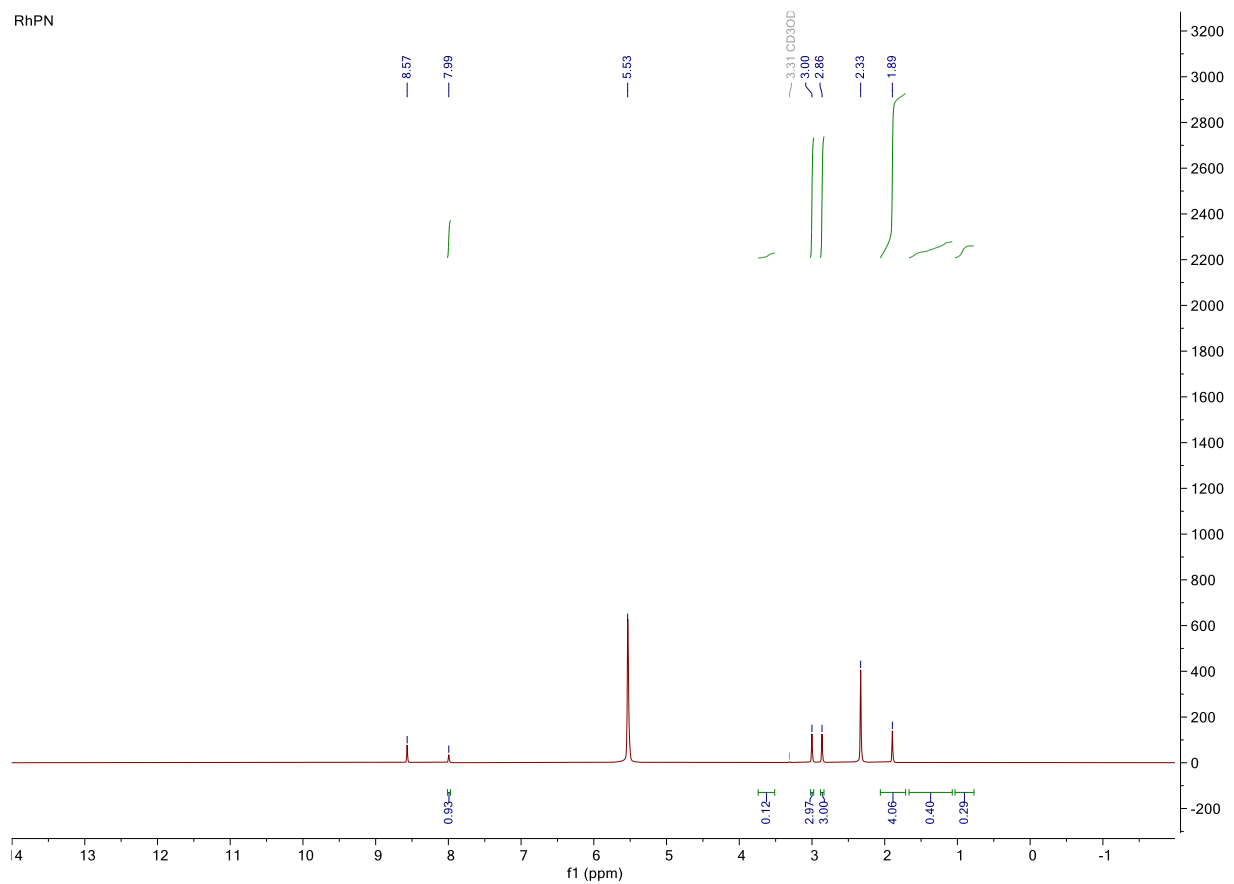

**Figure S12:** Quantitative  $^1\text{H}$  Spectrum of product mixture for table S2, entry 4 (catalyst **4**) in  $\text{CD}_3\text{OD}$ .

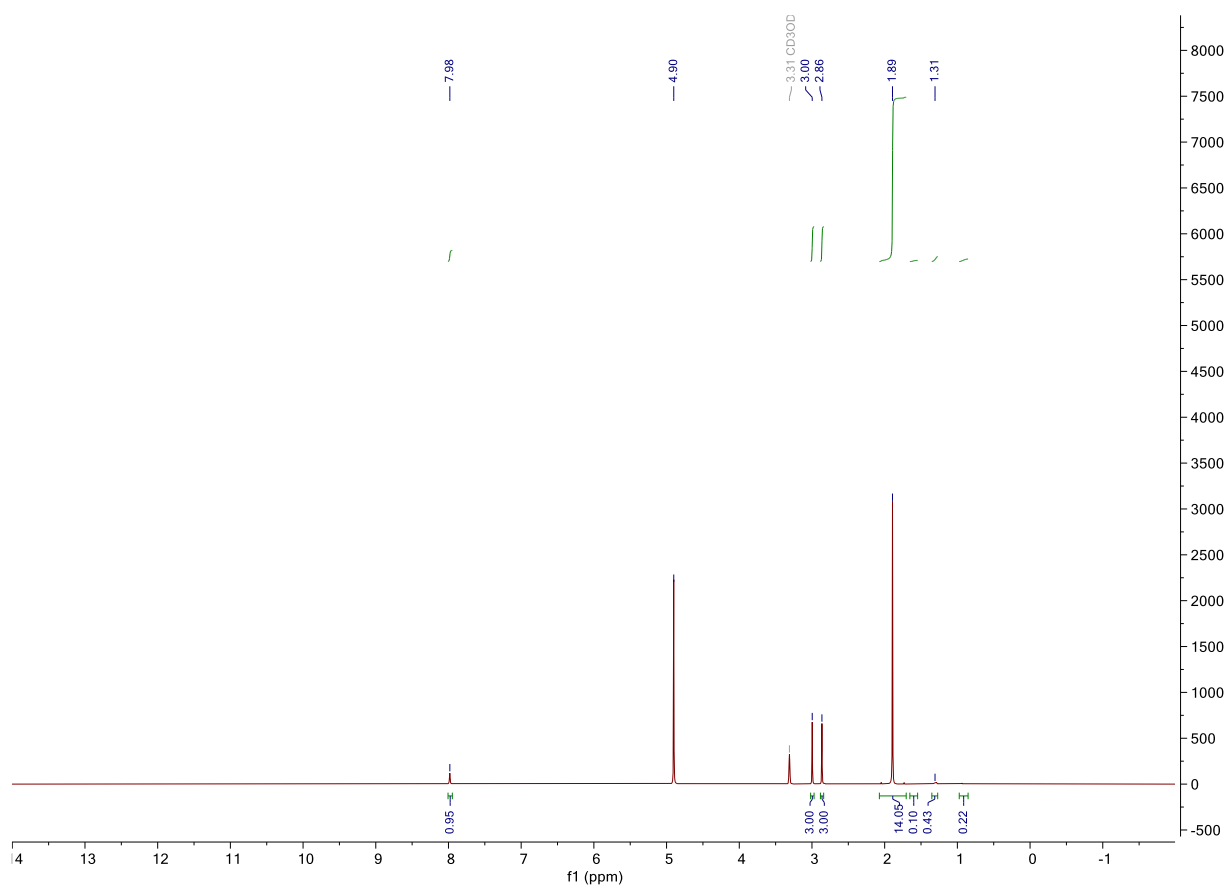

Figure S13: Quantitative  $^1\text{H}$  Spectrum of product mixture for table S2, entry 5 (catalyst 5) in  $\text{CD}_3\text{OD}$ .

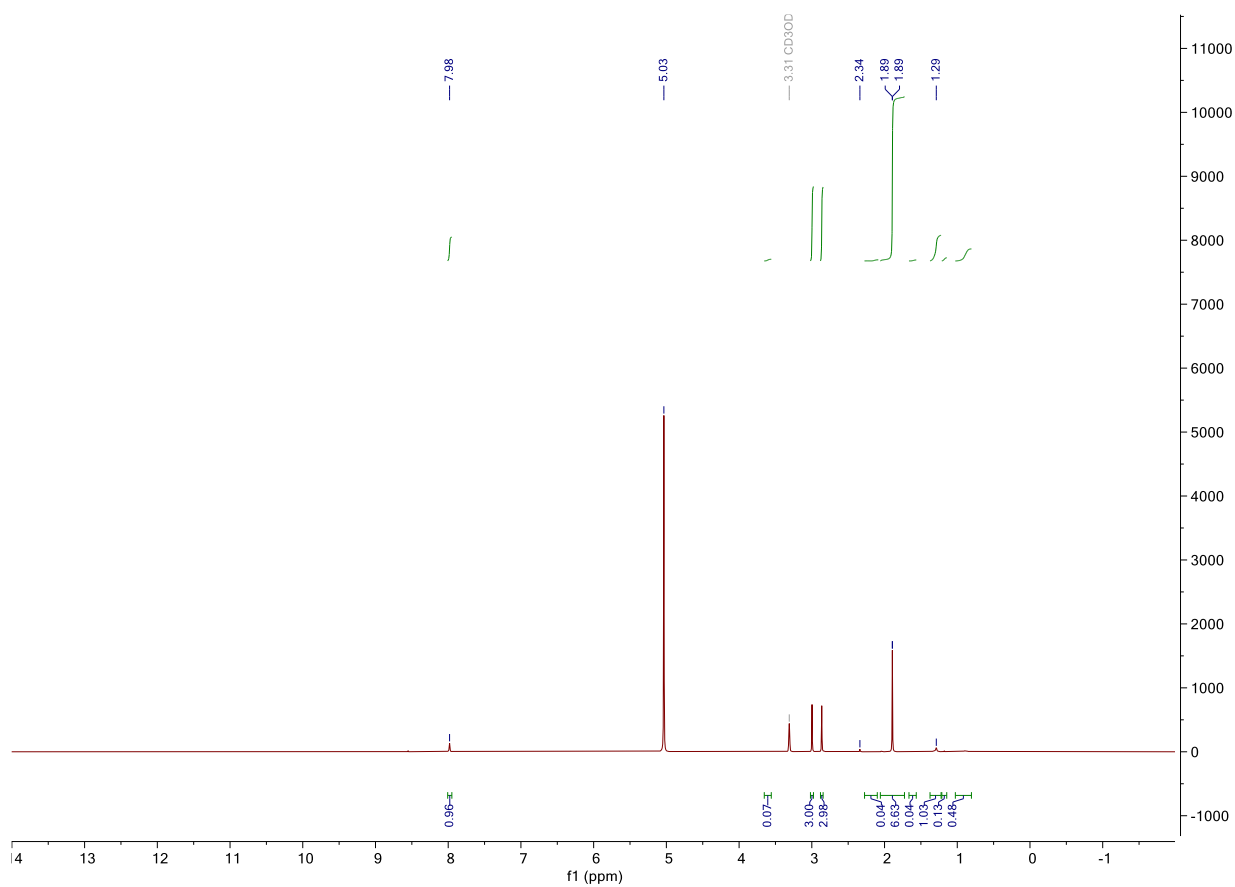

Figure S14: Quantitative  $^1\text{H}$  Spectrum of product mixture for table S2, entry 6 (catalyst 6) in  $\text{CD}_3\text{OD}$ .

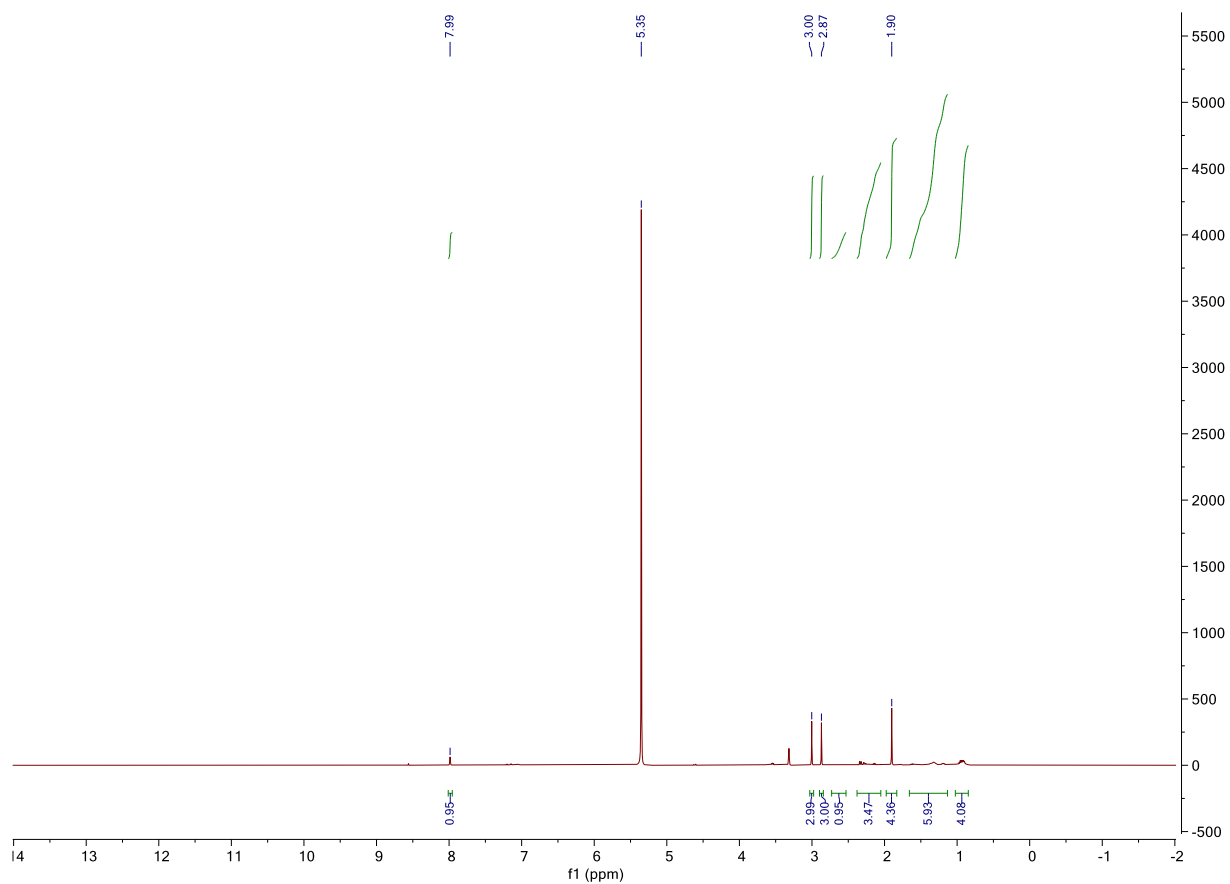

**Figure S15:** Quantitative  $^1\text{H}$  Spectrum of product mixture for table S2, entry 7 (catalyst **7**) in  $\text{CD}_3\text{OD}$ .

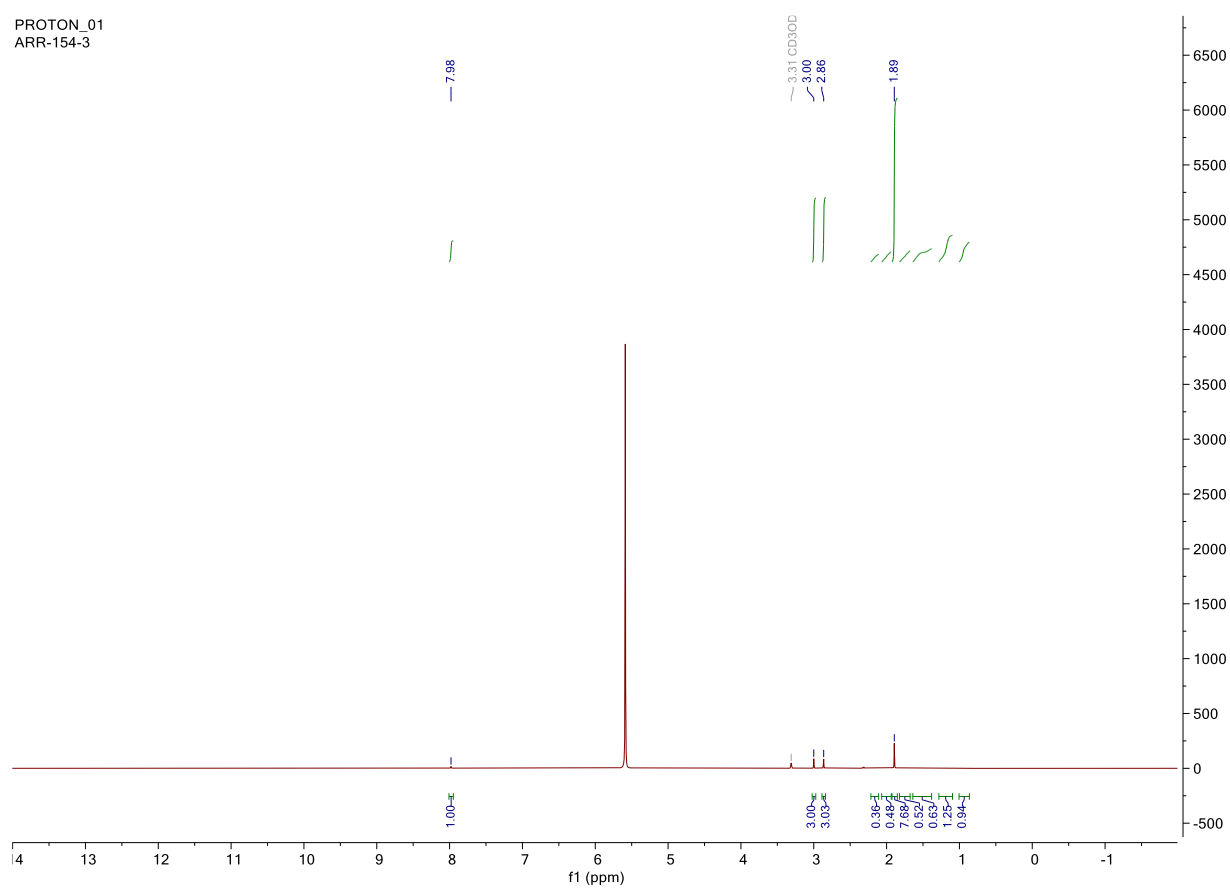

**Figure S16:** Quantitative  $^1\text{H}$  Spectrum of product mixture for table S2, entry 8 (catalyst **8**) in  $\text{CD}_3\text{OD}$ .

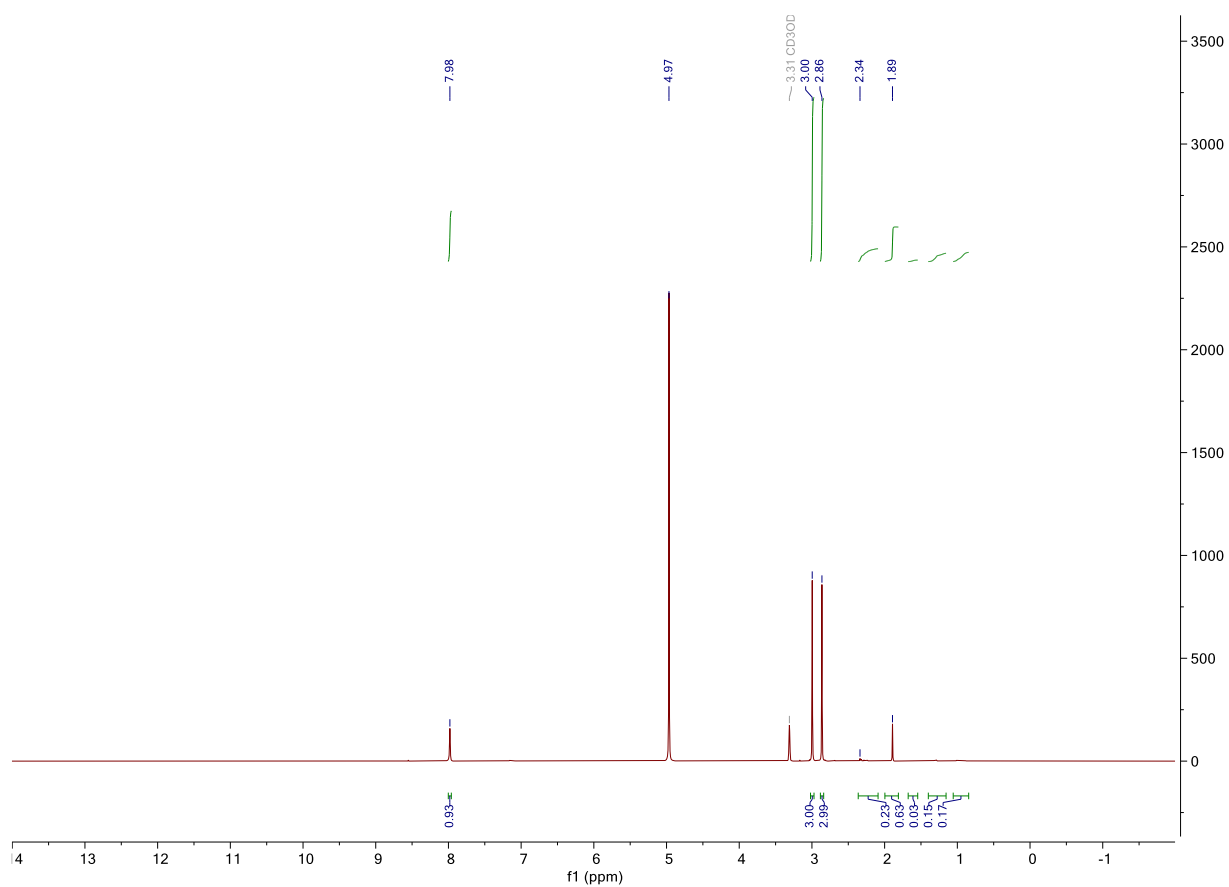

Figure S17: Quantitative  $^1\text{H}$  Spectrum of product mixture for table S2, entry 9 (catalyst 9) in  $\text{CD}_3\text{OD}$ .

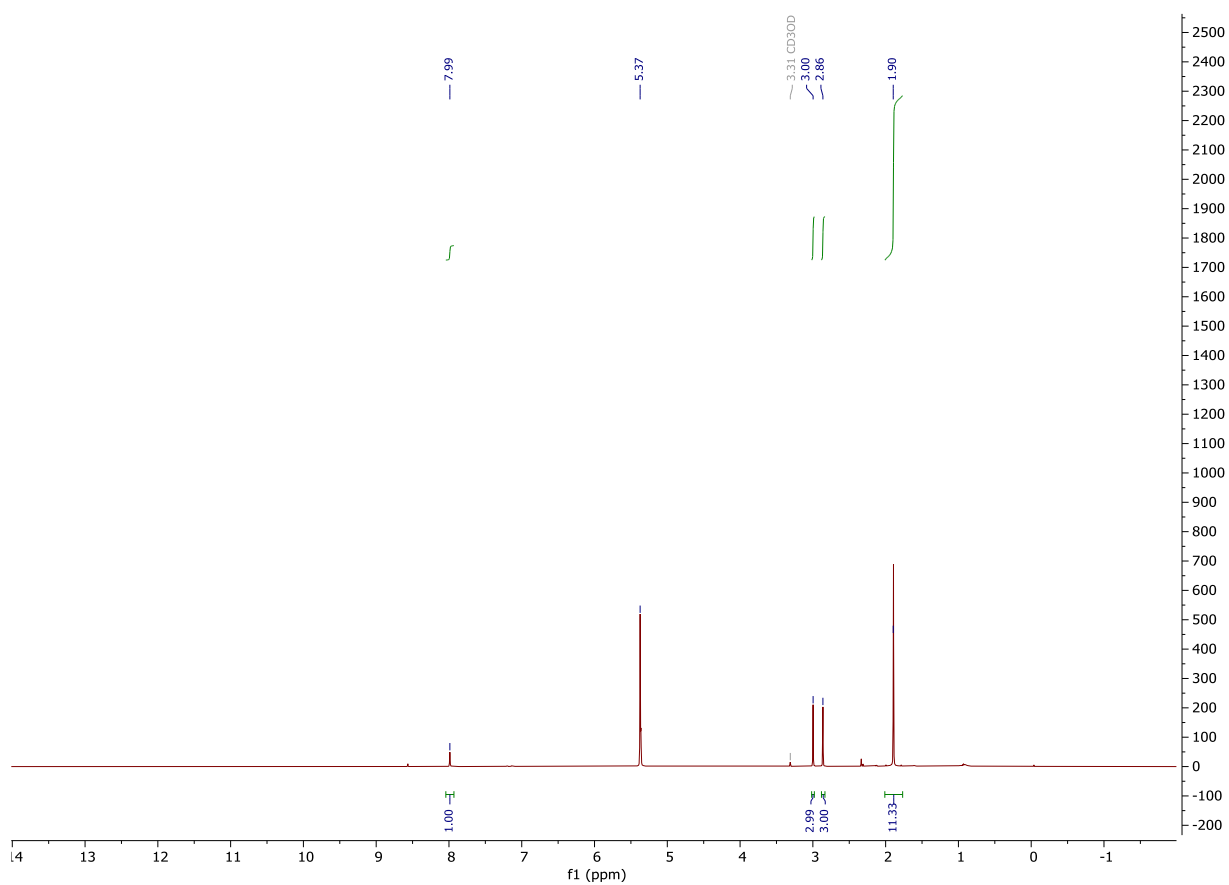

Figure S18: Quantitative  $^1\text{H}$  Spectrum of product mixture for table S2, entry 10 (catalyst 10) in  $\text{CD}_3\text{OD}$ .

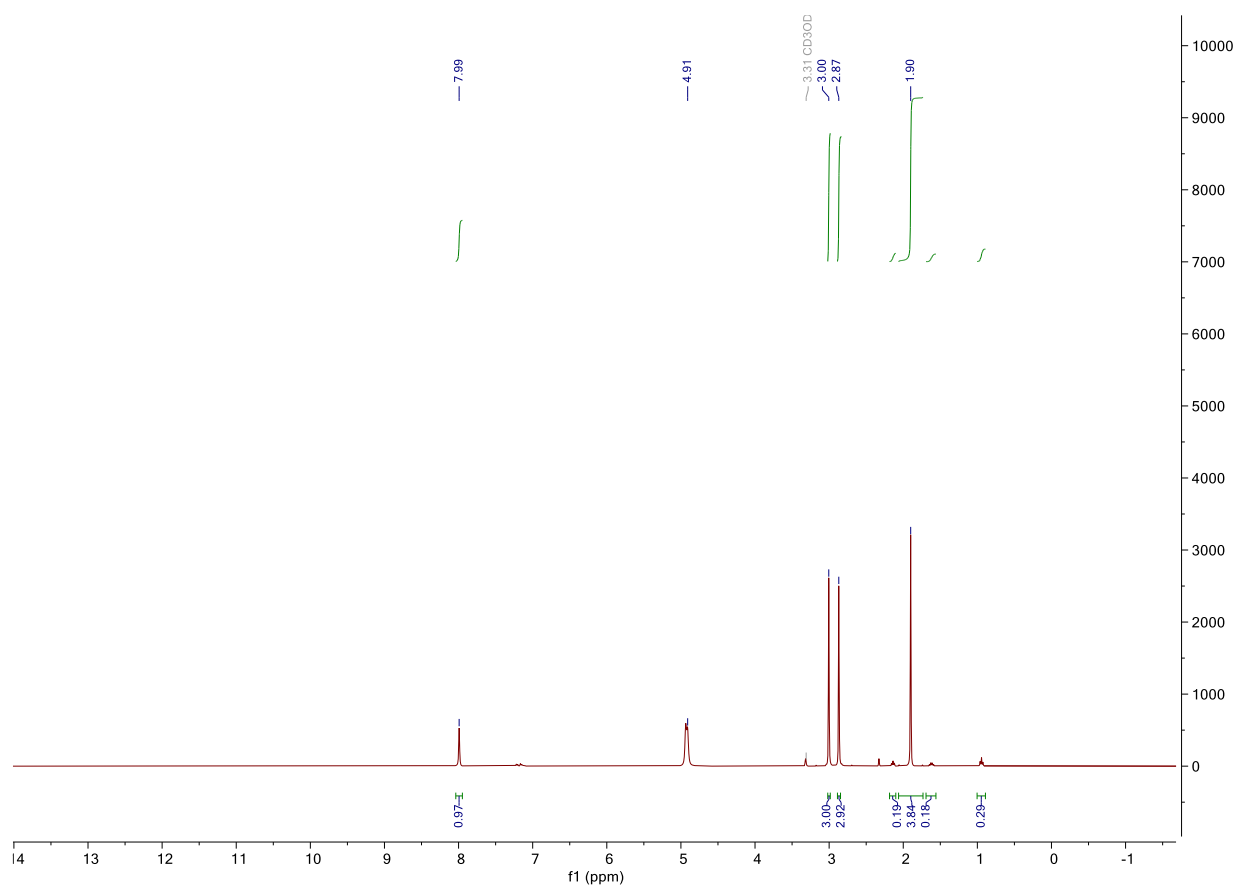

Figure S19: Quantitative  $^1\text{H}$  Spectrum of product mixture for table S2, entry 11 (catalyst **11**) in  $\text{CD}_3\text{OD}$ .

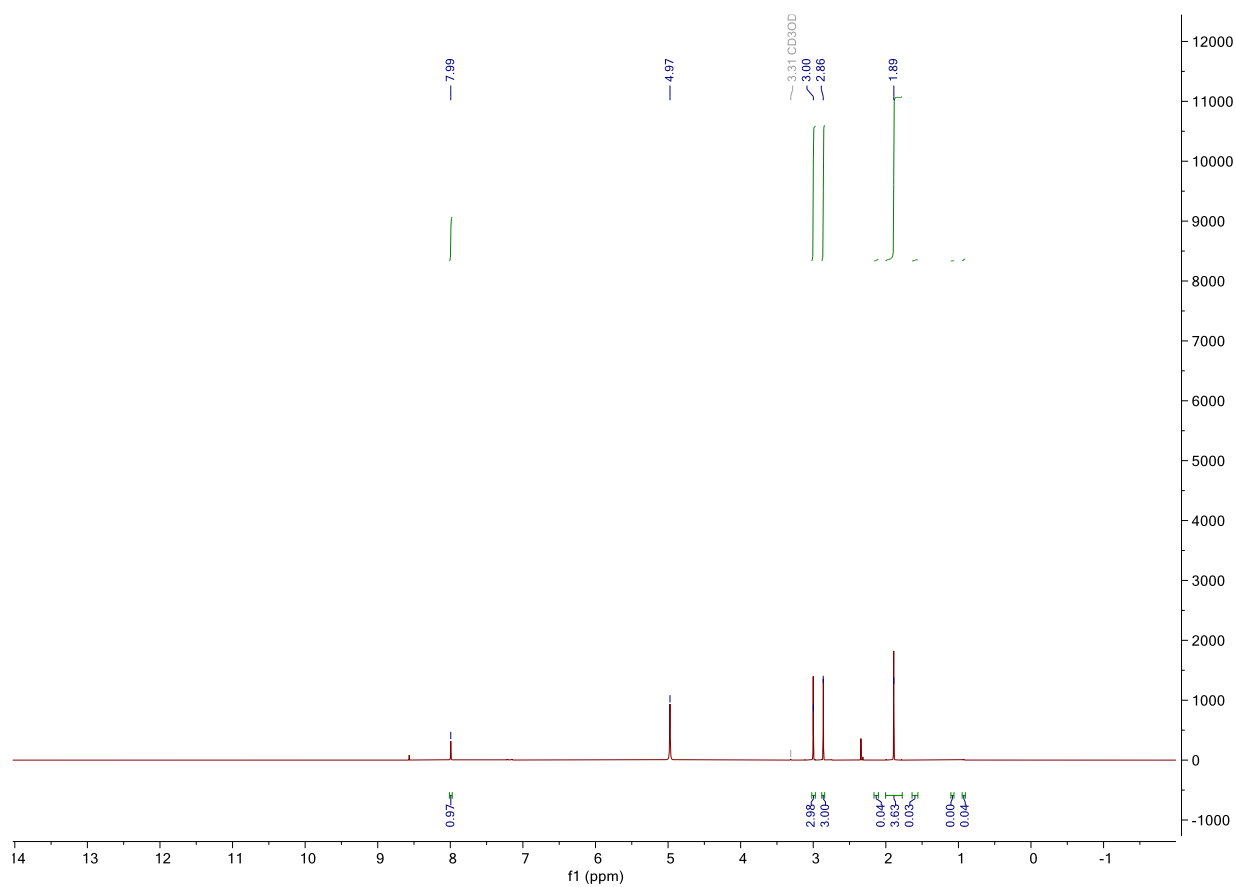

Figure S20: Quantitative  $^1\text{H}$  Spectrum of product mixture for table S2, entry 12 (catalyst **12**) in  $\text{CD}_3\text{OD}$ .

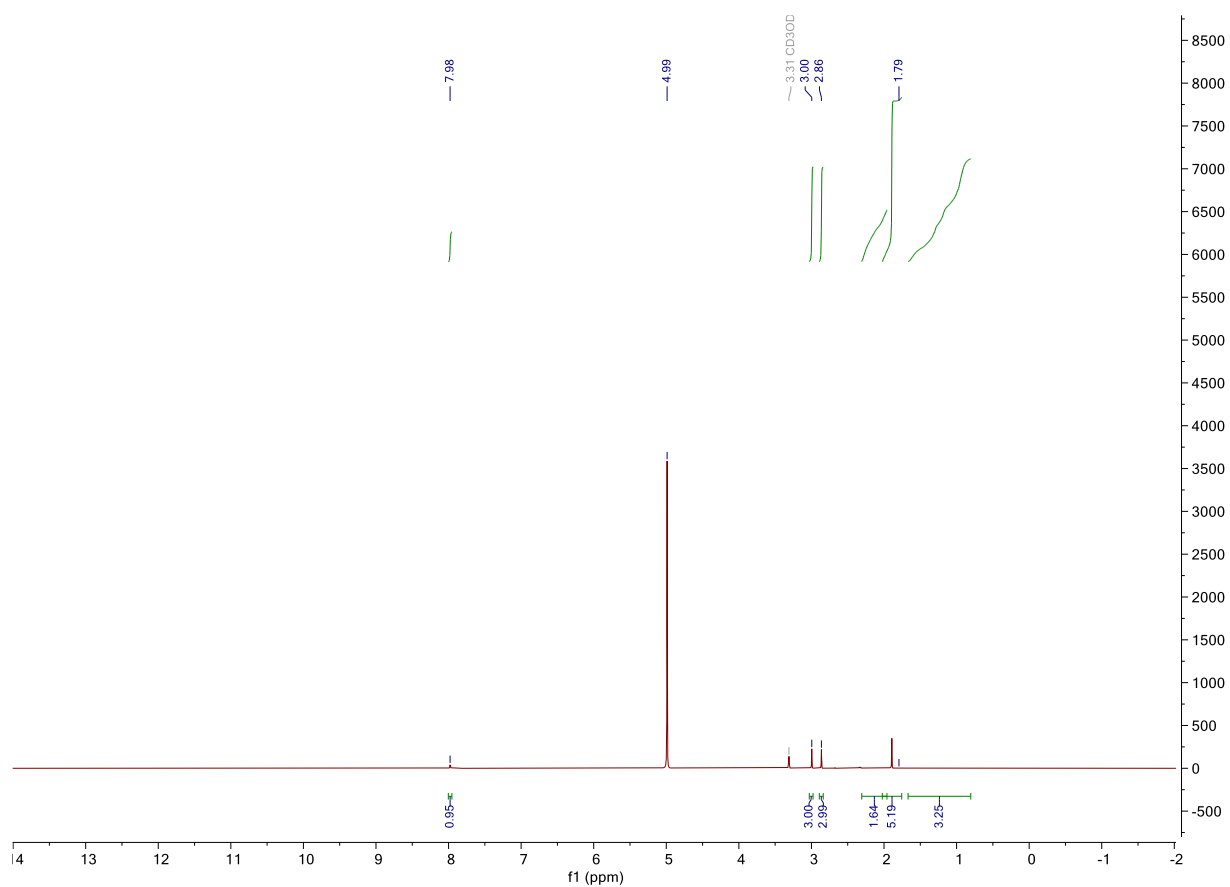

**Figure S21:** Quantitative  $^1\text{H}$  Spectrum of product mixture for table S2, entry 13 (catalyst **13**) in  $\text{CD}_3\text{OD}$ .

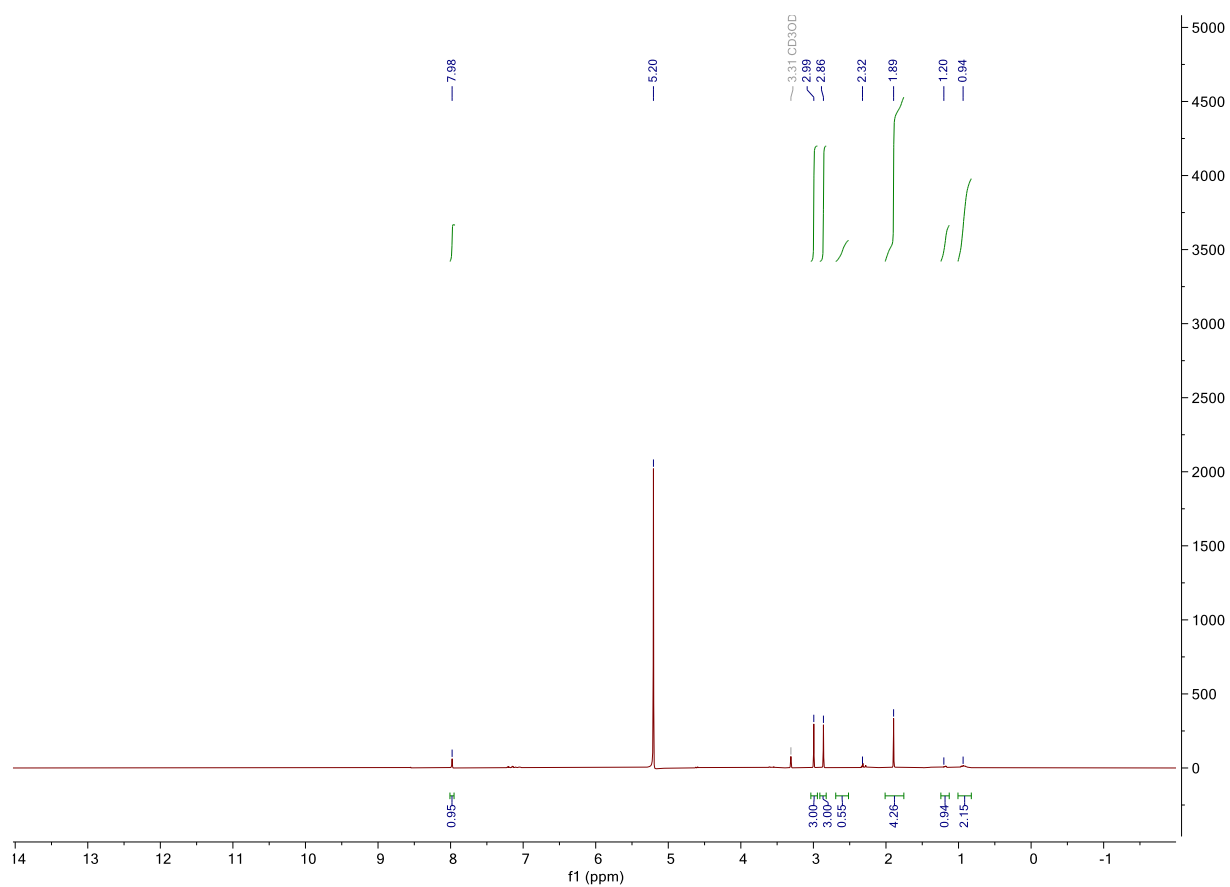

**Figure S22:** Quantitative  $^1\text{H}$  Spectrum of product mixture for table S2, entry 14 (catalyst **14**) in  $\text{CD}_3\text{OD}$ .

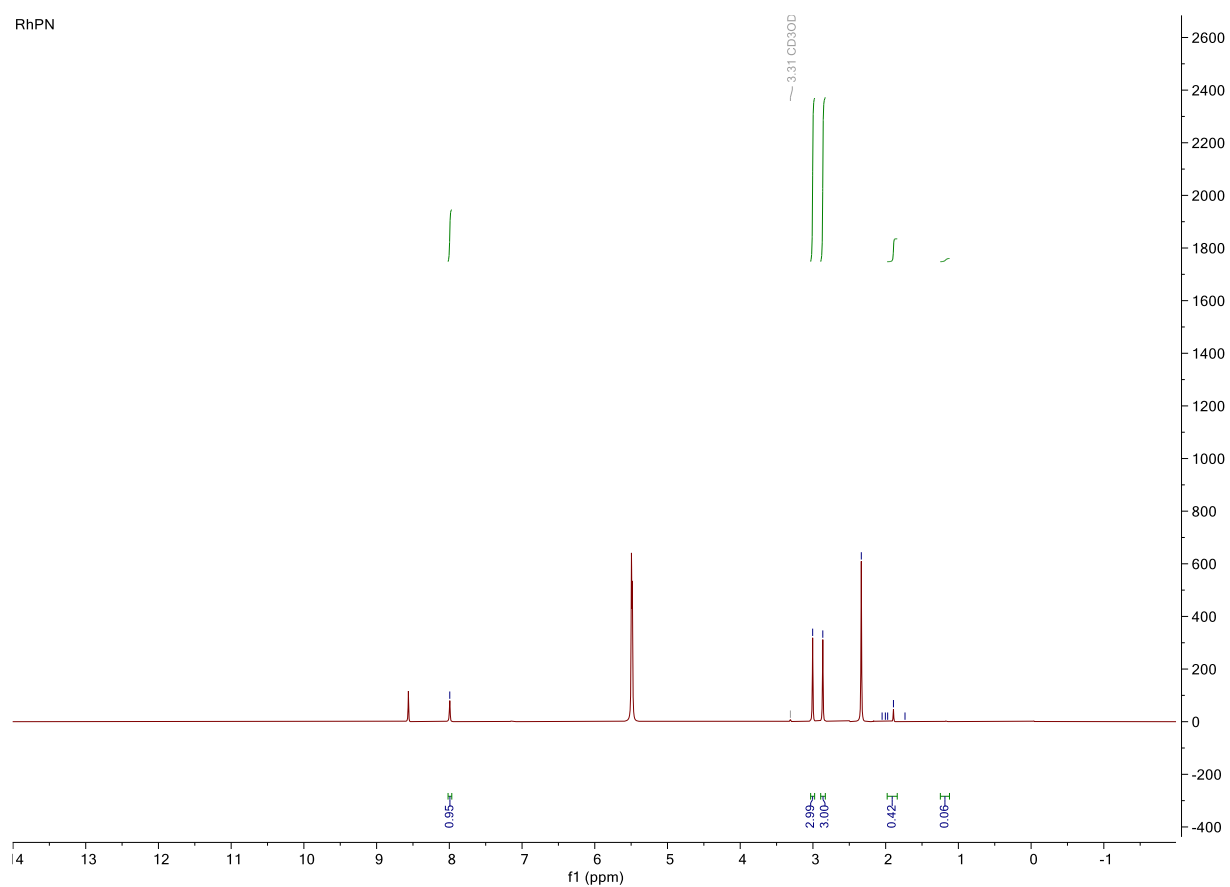

Figure S23: Quantitative  $^1\text{H}$  Spectrum of product mixture for table S2, entry 15 (catalyst 15) in  $\text{CD}_3\text{OD}$ .

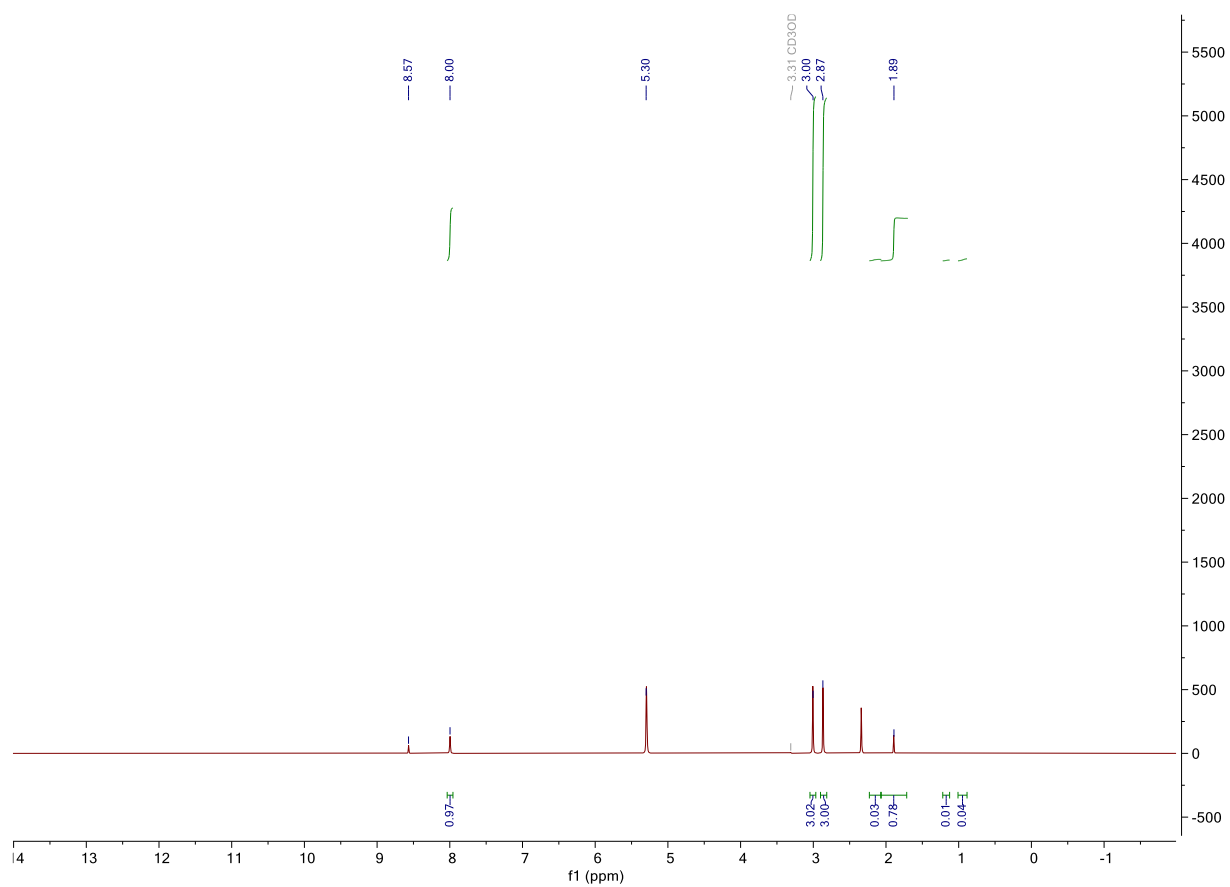

Figure S24: Quantitative  $^1\text{H}$  Spectrum of product mixture for table S2, entry 16 (catalyst 16) in  $\text{CD}_3\text{OD}$ .



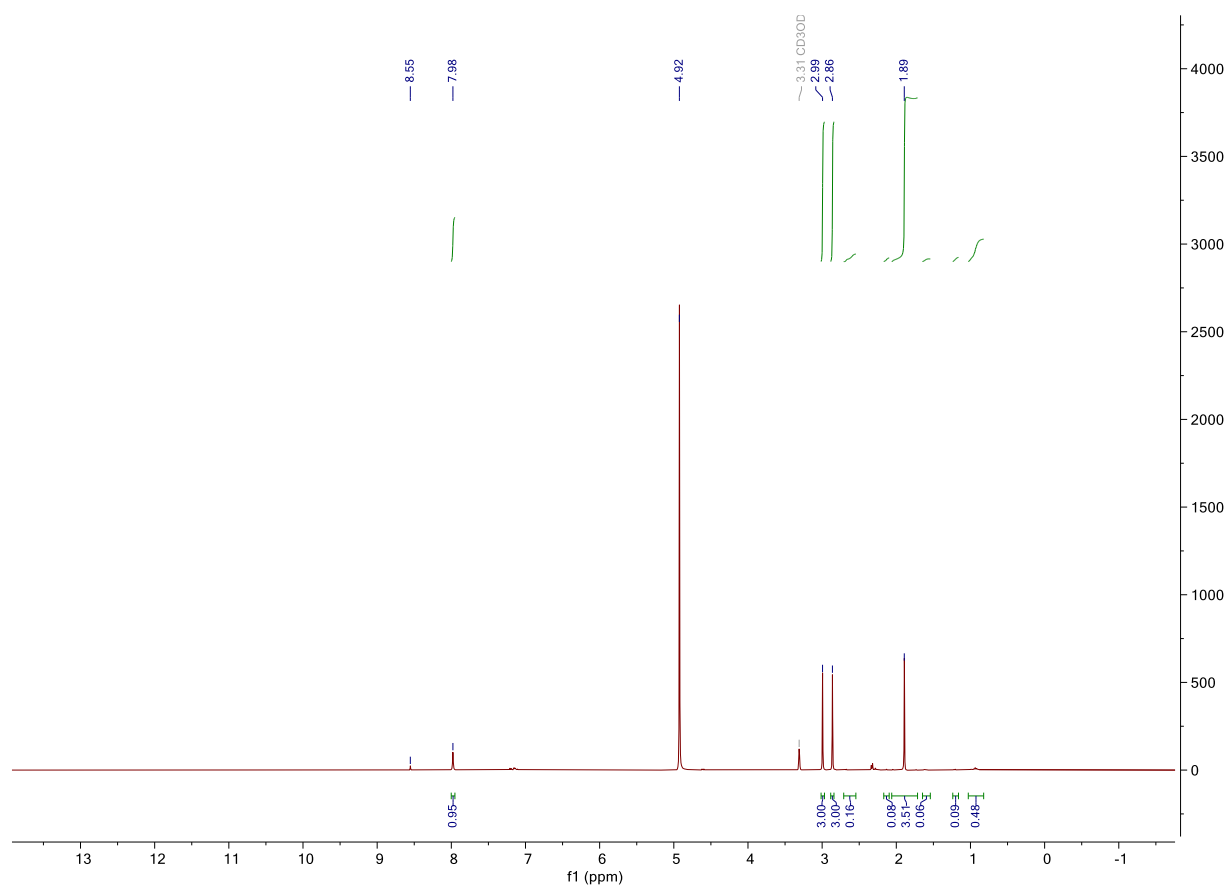

**Figure S25:** Quantitative  $^1\text{H}$  Spectrum of product mixture for table S2, entry 17 (catalyst **17**) in  $\text{CD}_3\text{OD}$ .

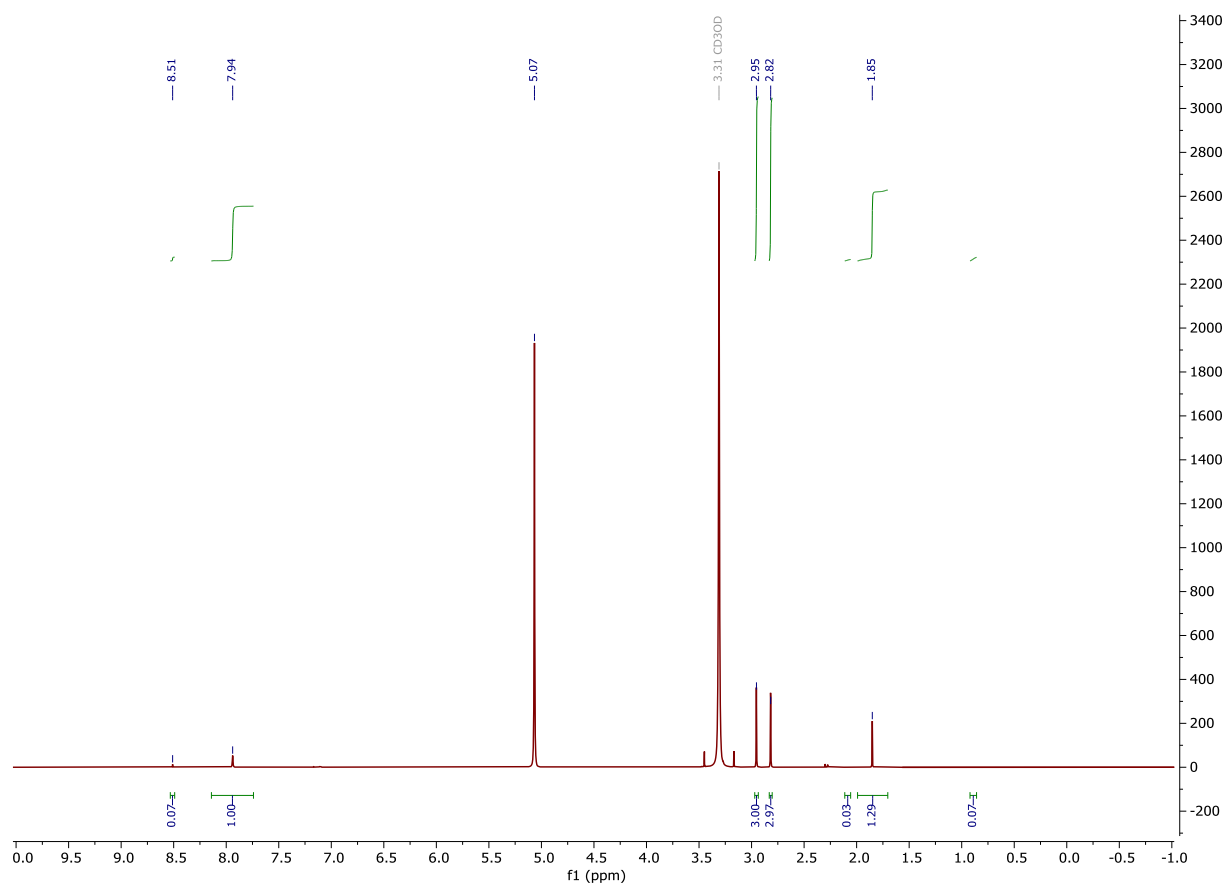

**Figure S26:** Quantitative  $^1\text{H}$  Spectrum of product mixture for table S2, entry 18 (catalyst **18**) in  $\text{CD}_3\text{OD}$ .

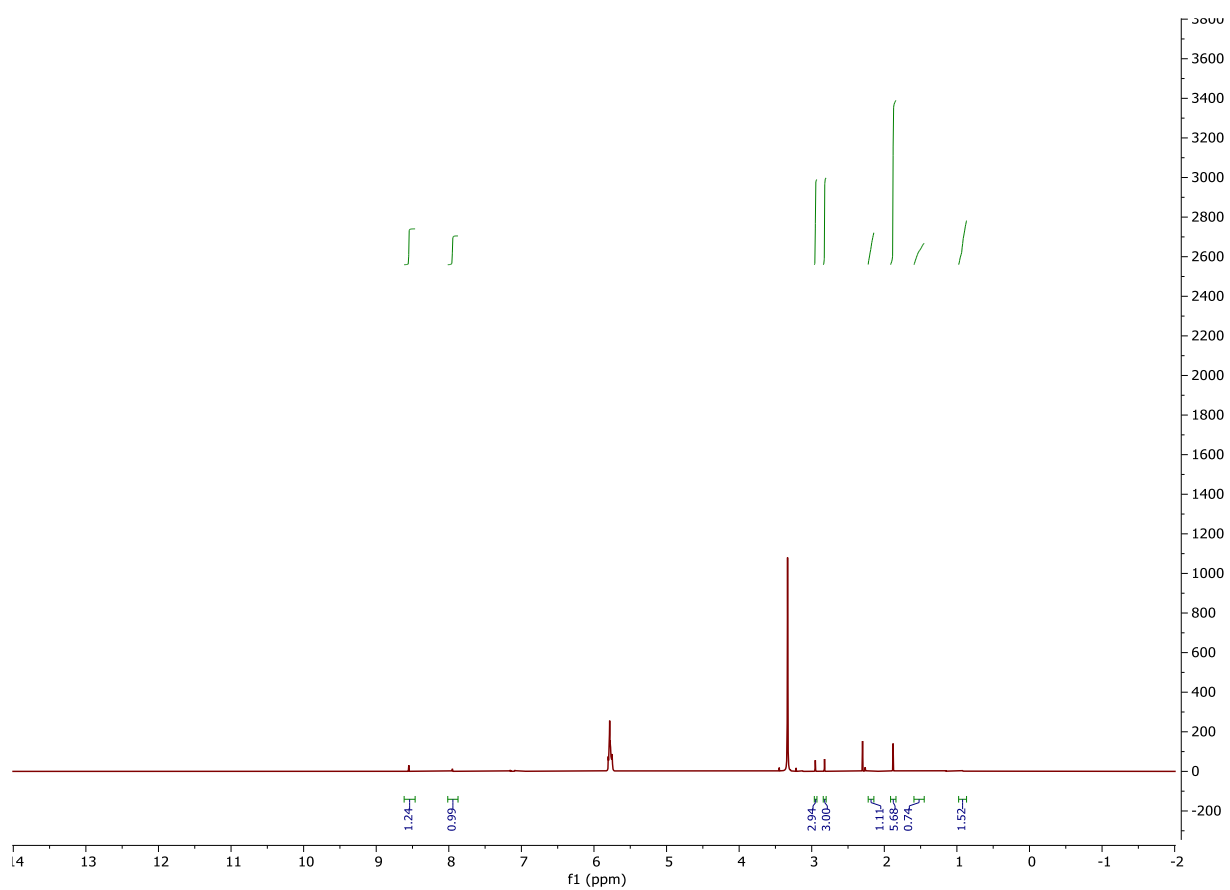

**Figure S27:** Quantitative  $^1\text{H}$  Spectrum of product mixture for table S2, entry 19 (catalyst **19**) in  $\text{CD}_3\text{OD}$ .

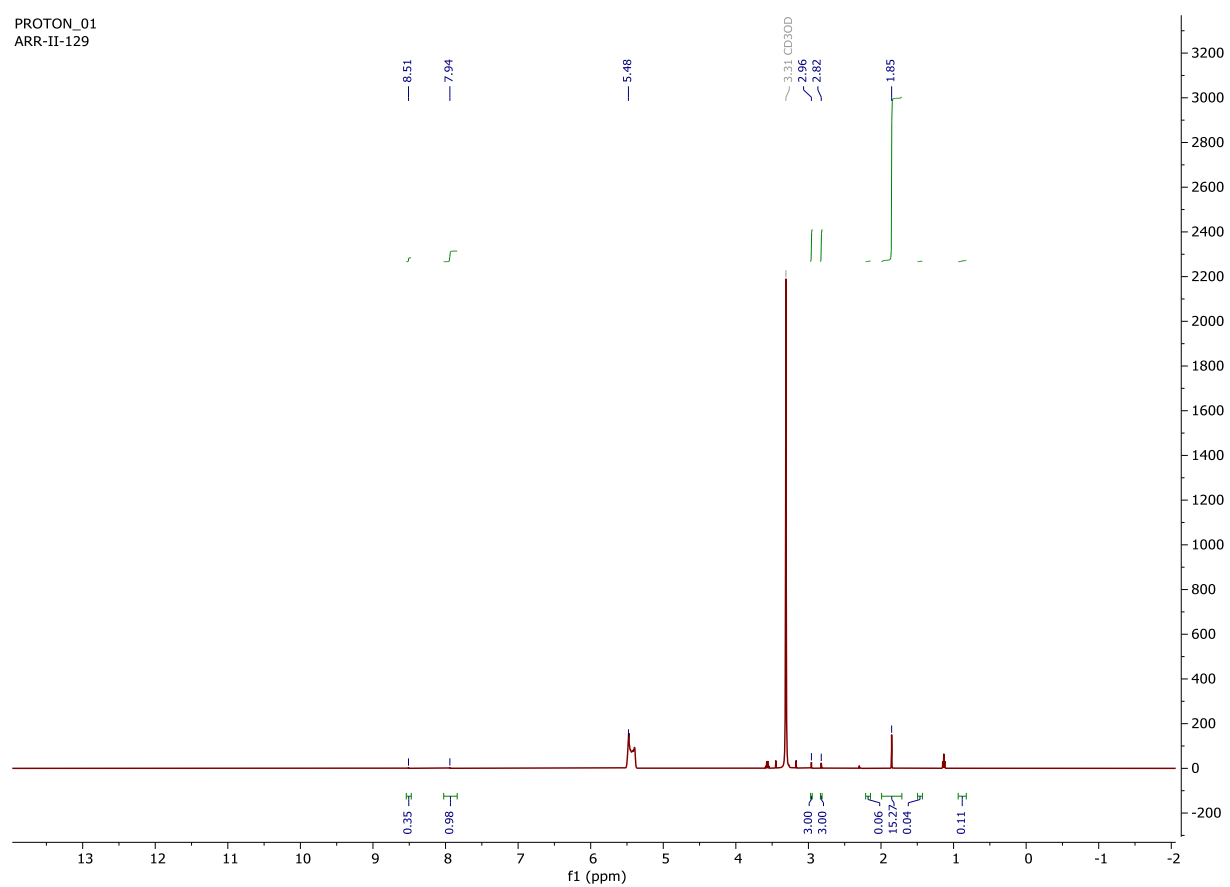

**Figure S28:** Quantitative  $^1\text{H}$  Spectrum of product mixture for table S2, entry 20 (catalyst **20**) in  $\text{CD}_3\text{OD}$ .

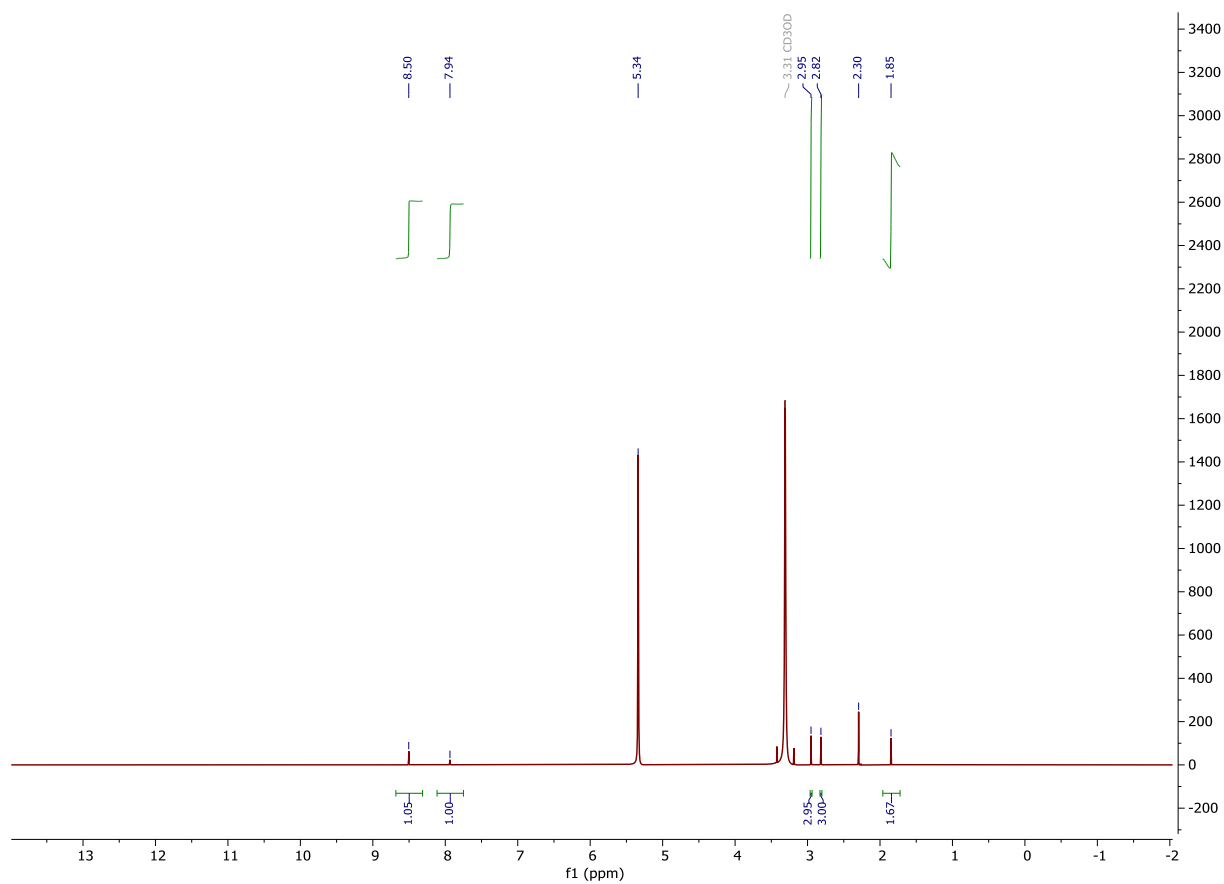

Figure S29: Quantitative  $^1\text{H}$  Spectrum of product mixture for table S2, entry 21 (catalyst **21**) in  $\text{CD}_3\text{OD}$ .

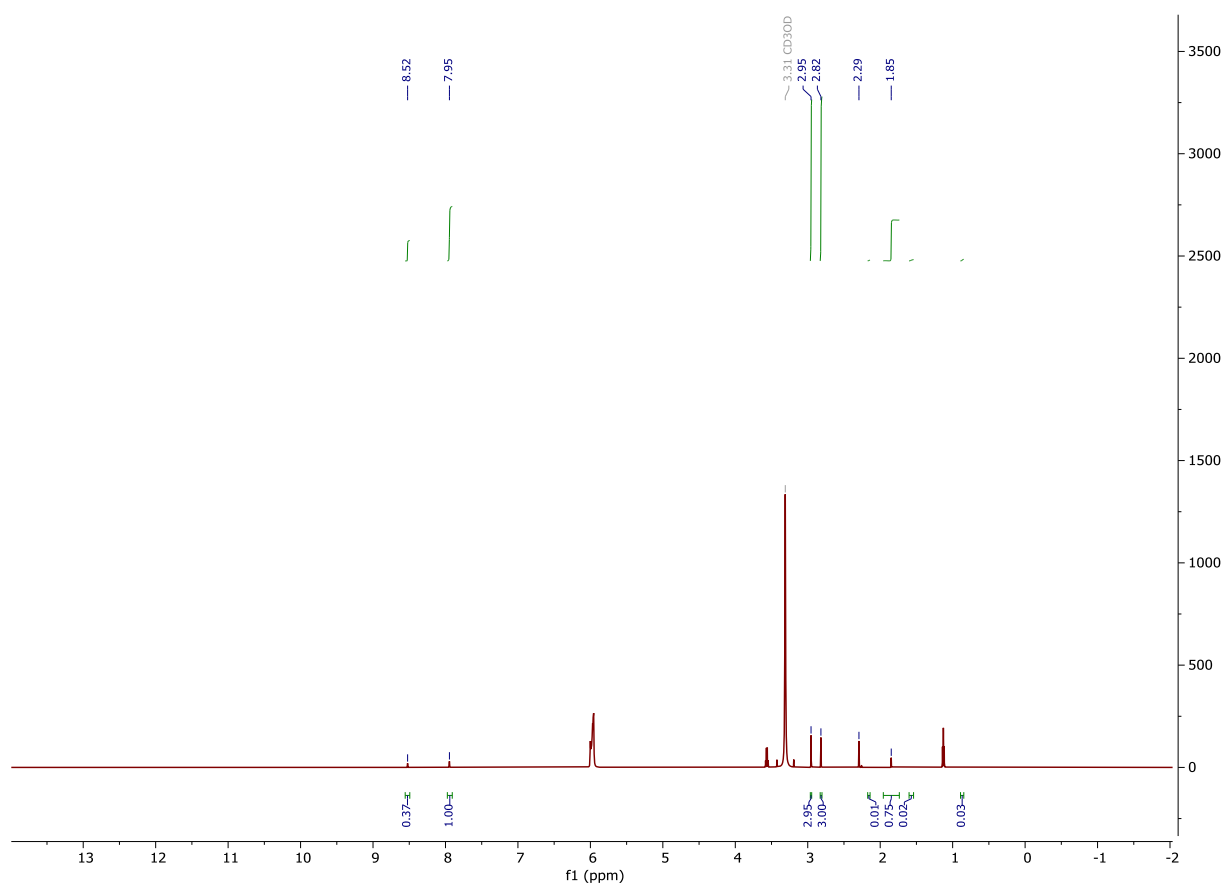

Figure S30: Quantitative  $^1\text{H}$  Spectrum of product mixture for table S2, entry 22 (catalyst **22**) in  $\text{CD}_3\text{OD}$ .

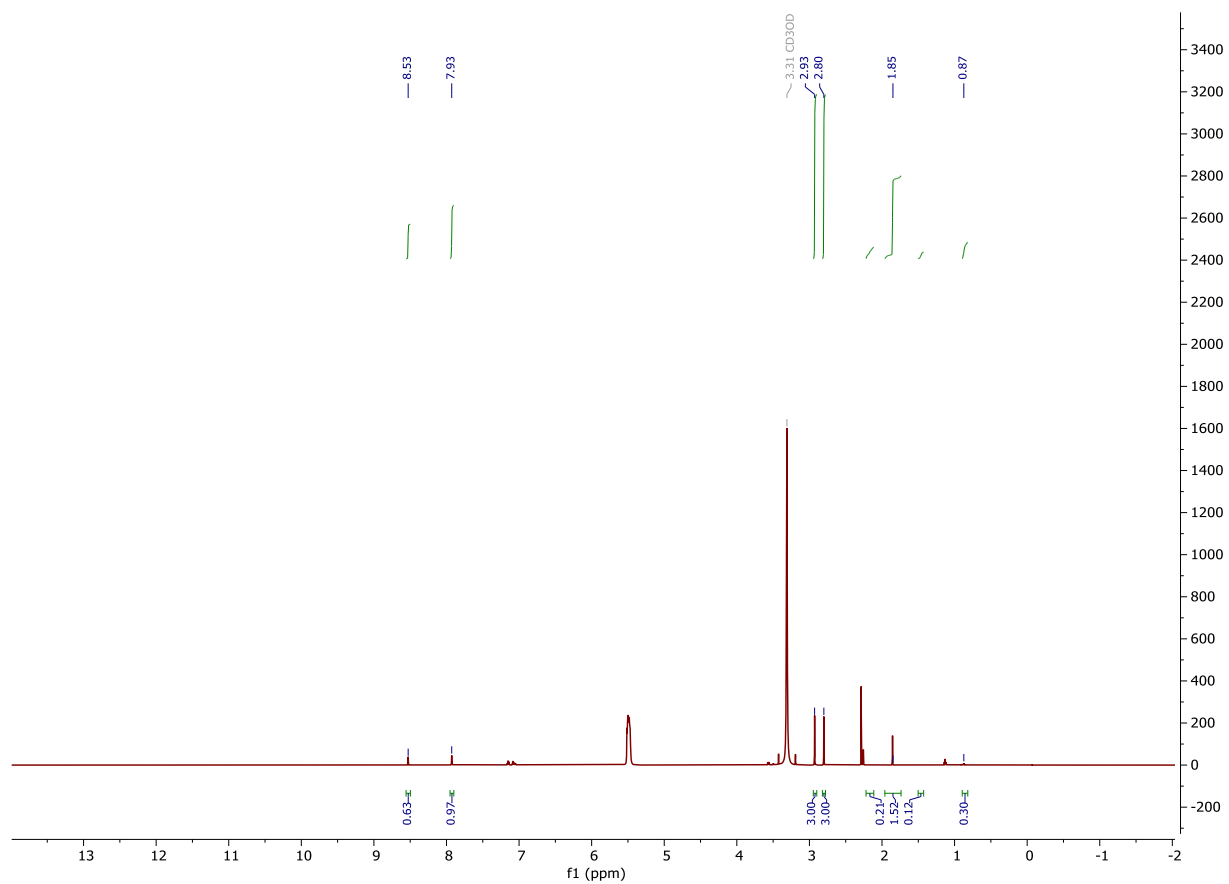

Figure S31: Quantitative  $^1\text{H}$  Spectrum of product mixture for table S2, entry 23 (catalyst **23**) in  $\text{CD}_3\text{OD}$ .

### Ambient Condition Optimization Reactions

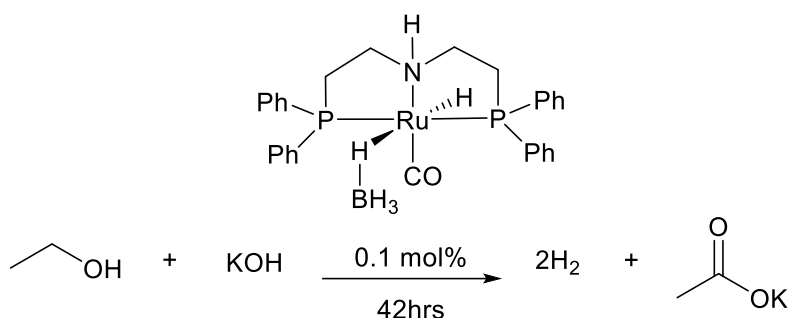

Each reaction was done with varying amounts of reagents, solvent, or additives as summarized in table S3. In a representative procedure, in a nitrogen filled glovebox, potassium hydroxide (0.5 equiv = 0.64 g, 9.8 mmol) was weighed out and added to a 25 mL round bottom flask. Next, Ru-MACHO-BH (catalyst **10**, 0.1 mol %, 11.7mg, 20  $\mu$ mol relative to reactant in excess) and toluene (10 mL, distilled from benzophenone ketyl), or 0 mL if described as “neat”) was weighed out and added. Finally, an amount of ethanol (200 proof, 1 equiv = 0.92 g, 20 mmol) was weighed in a vial and quantitatively transferred to the round bottom flask. Each reaction flask was added a reflux condenser outfitted with a septum, and each was refluxed for a minimum of 42 hours at 120 °C. Gas production was measured by water eudiometry, attached through a needle. After 42 hours, volatiles removed using a rotary evaporator under reduced pressure. Quantitative NMR samples were prepared by adding methanol-*d*<sub>4</sub> (700 mL) and dimethylformamide (DMF, 0.10 g, 1.37 mmol) and subsequently analyzed by <sup>1</sup>H NMR. After NMR analysis, volatiles were again removed using a rotary evaporator under reduced pressure and the resulting solid was diluted in 50 mL of deionized water and titrated to determine the molar percentage of acetate in the sample.

**Table S3: Results of Reaction Optimization**

| Entry | EtOH (eq) | KOH (eq) | Solvent | Temperature (°C) | Solvent (mL) | Acetate (%) | Carboxylates (mol%) <sup>b</sup> |
|-------|-----------|----------|---------|------------------|--------------|-------------|----------------------------------|
| 1     | 1         | 0.75     | Toluene | 120              | 10           | 73.2        | 98                               |
| 2     | 1         | 0.5      | Toluene | 120              | 10           | 94          | 99                               |
| 3     | 0.75      | 1        | Toluene | 120              | 10           | 18          | 47                               |
| 4     | 0.5       | 1        | Toluene | 120              | 10           | 27          | 48                               |
| 5     | 1         | 0.5      | Toluene | 80               | 10           | 77          | 94                               |
| 6     | 1         | 0.5      | Neat    | 80               | Neat         | 3           | 14                               |
| 7     | 1         | 0.17     | Neat    | 80               | Neat         | 87          | 96                               |

<sup>a</sup> Catalyst loading based on moles of ethanol entries 1-4. Based on moles of KOH entries 5-7. <sup>b</sup> Molar percent carboxylates determined by titration. <sup>c</sup> Run at 80 °C.

### Ambient Condition Optimization NMR Spectra

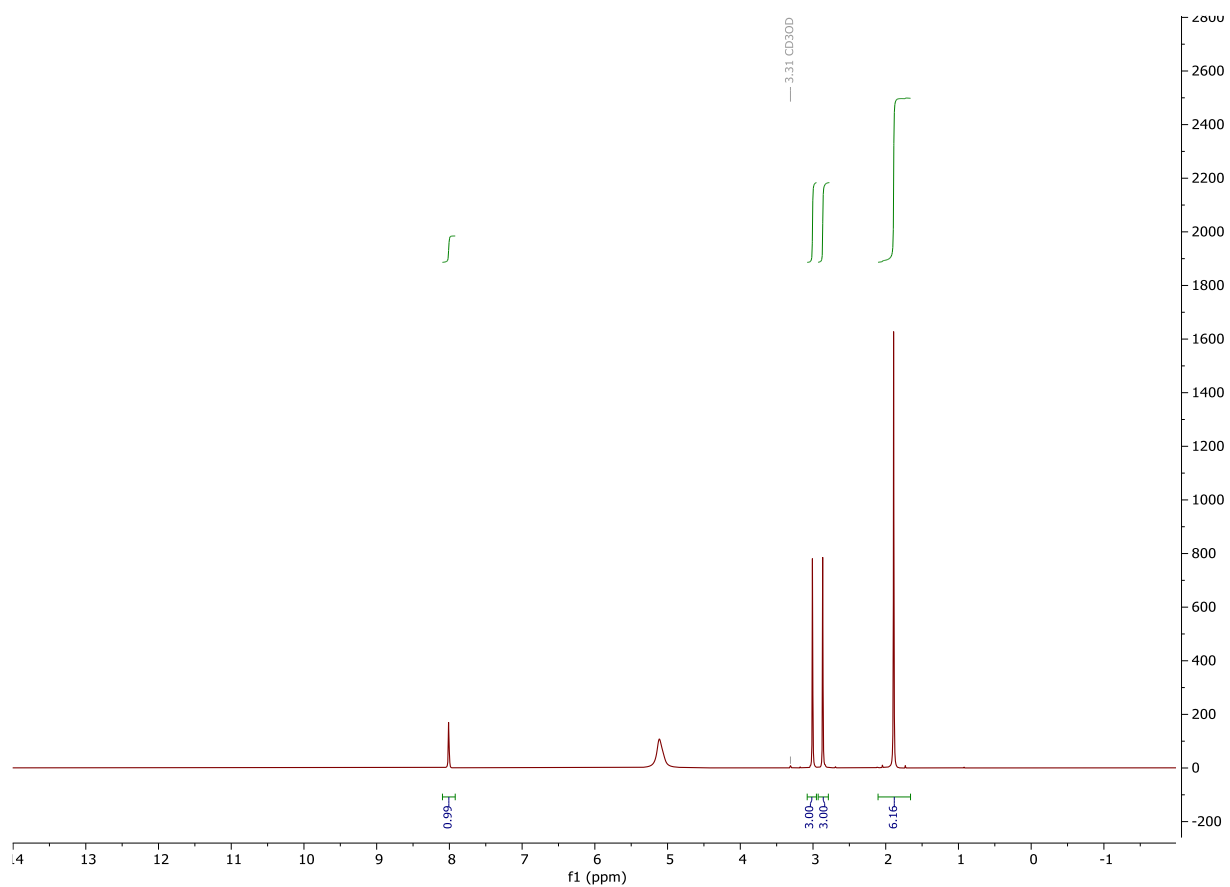

Figure S32: Quantitative <sup>1</sup>H Spectrum of product mixture for table S3, entry 1 in CD<sub>3</sub>OD.

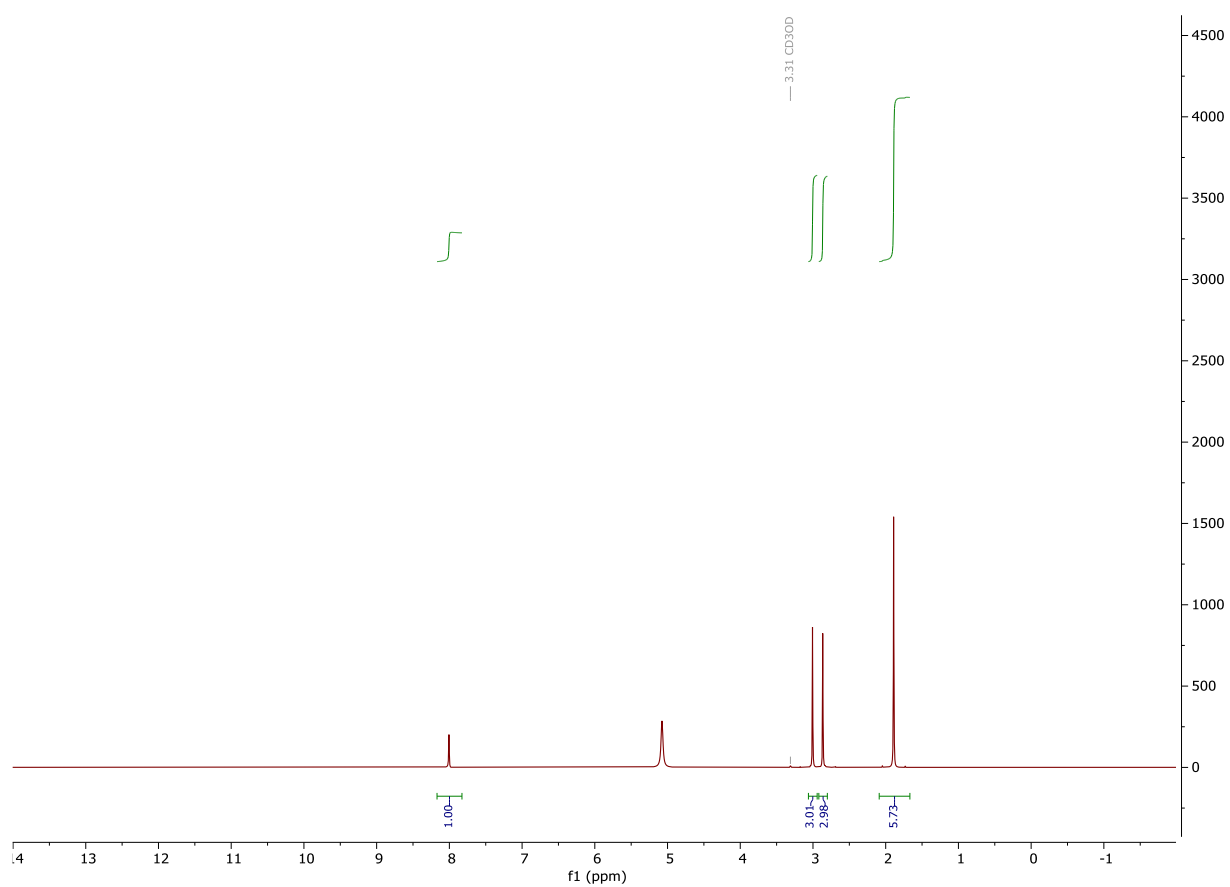

Figure S33: Quantitative <sup>1</sup>H Spectrum of product mixture for table S3, entry 2 in CD<sub>3</sub>OD.

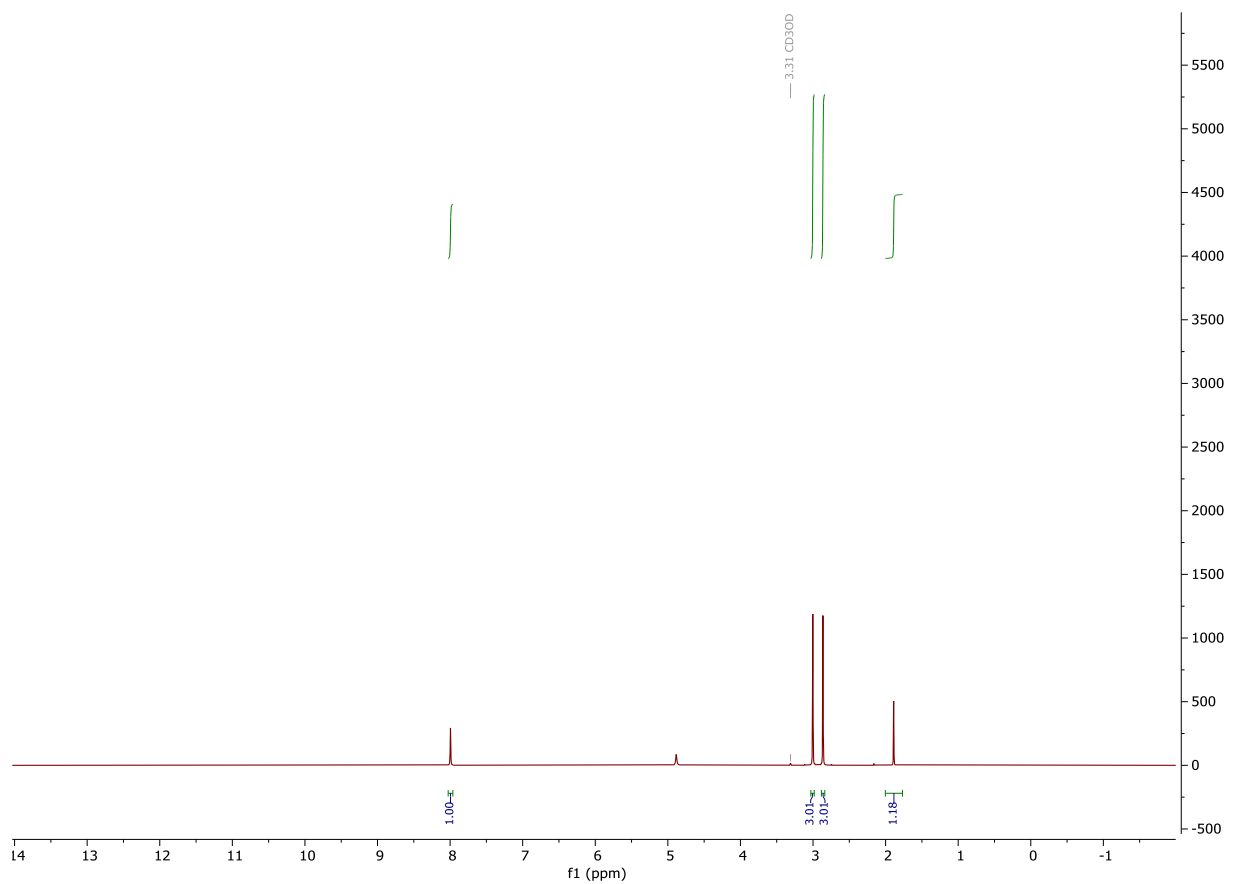

Figure S34: Quantitative <sup>1</sup>H Spectrum of product mixture for table S3, entry 3 in CD<sub>3</sub>OD.

ARR-II-18-1

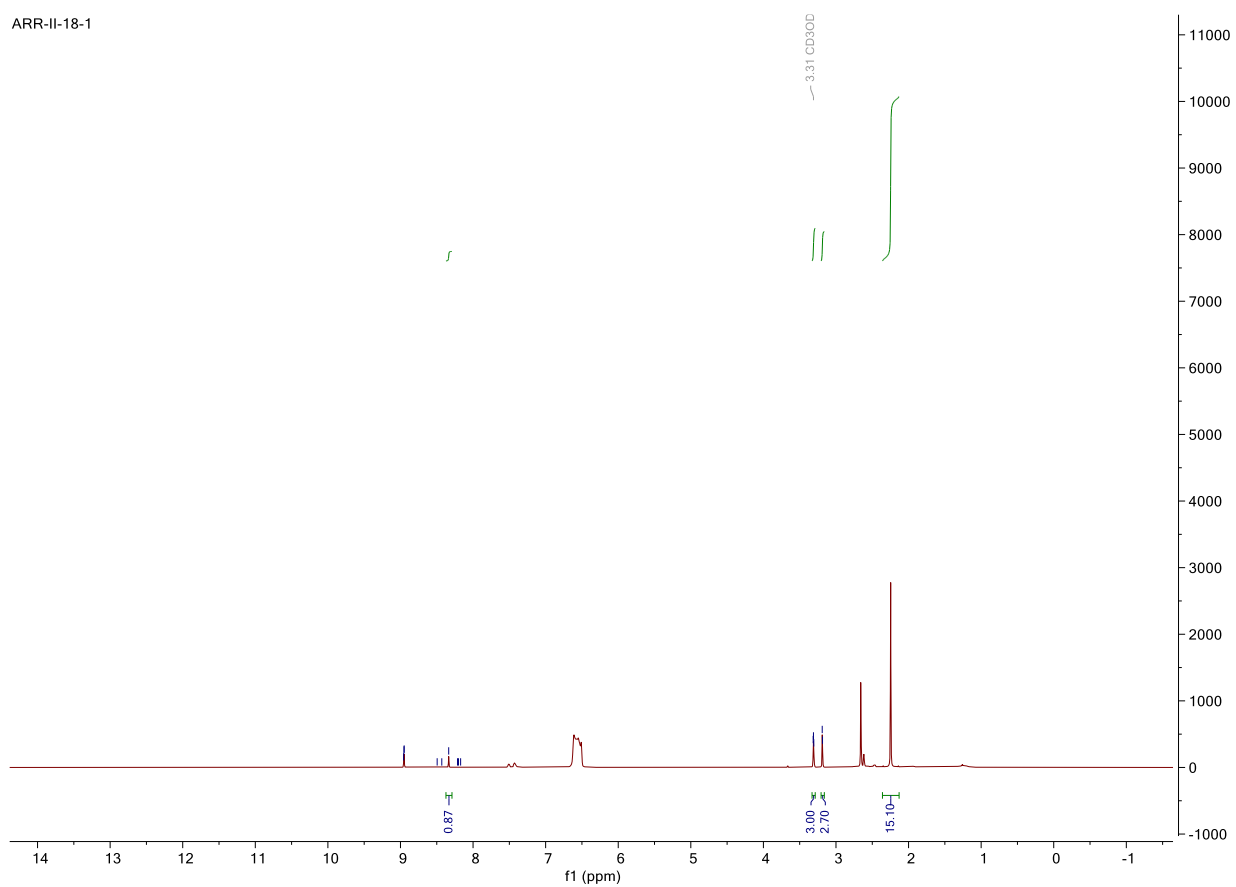

Figure S35: Quantitative <sup>1</sup>H Spectrum of product mixture for table S3, entry 4 in CD<sub>3</sub>OD.

PROTON\_01  
ARR-II-20-1

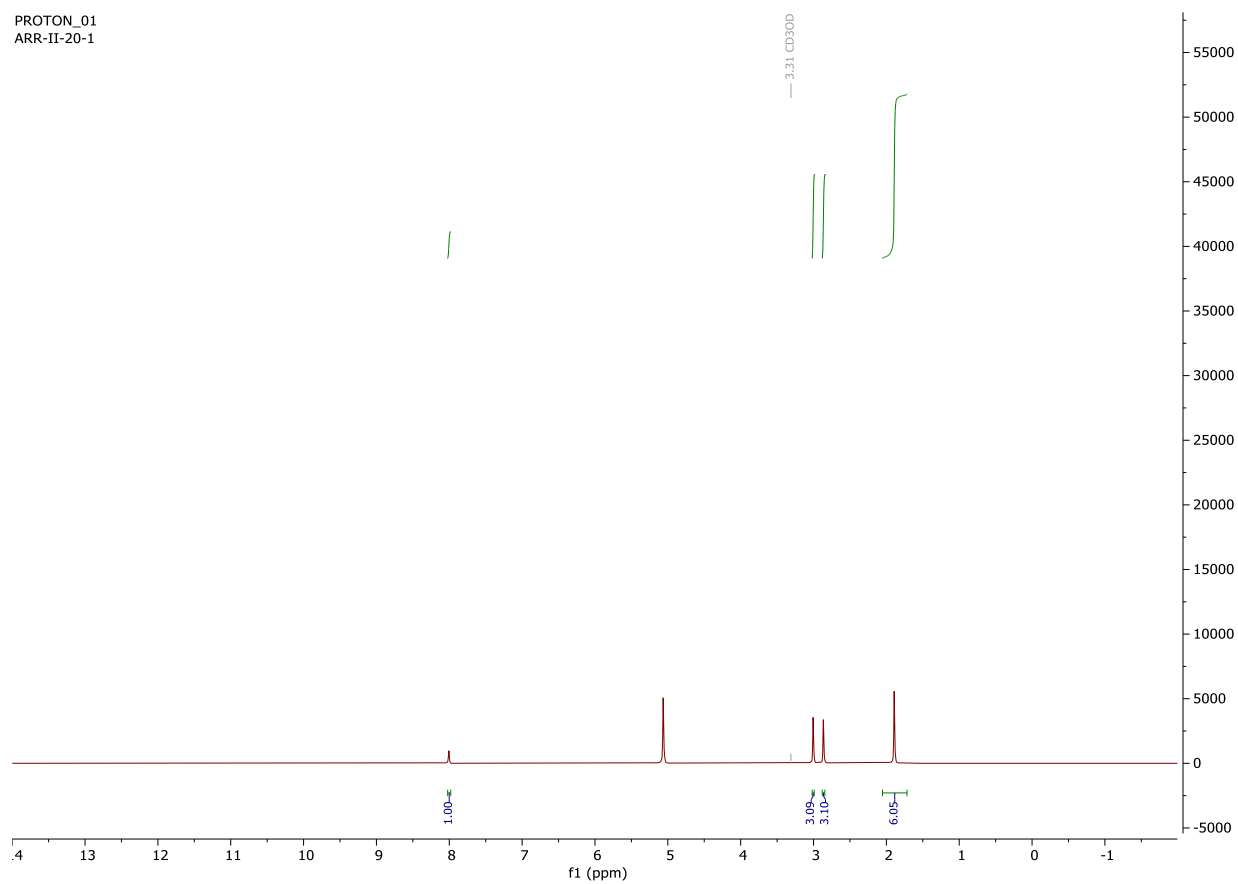

Figure S36: Quantitative <sup>1</sup>H Spectrum of product mixture for table S3, entry 5 in CD<sub>3</sub>OD.

PROTON\_01  
ARR-II-20-2-REDO

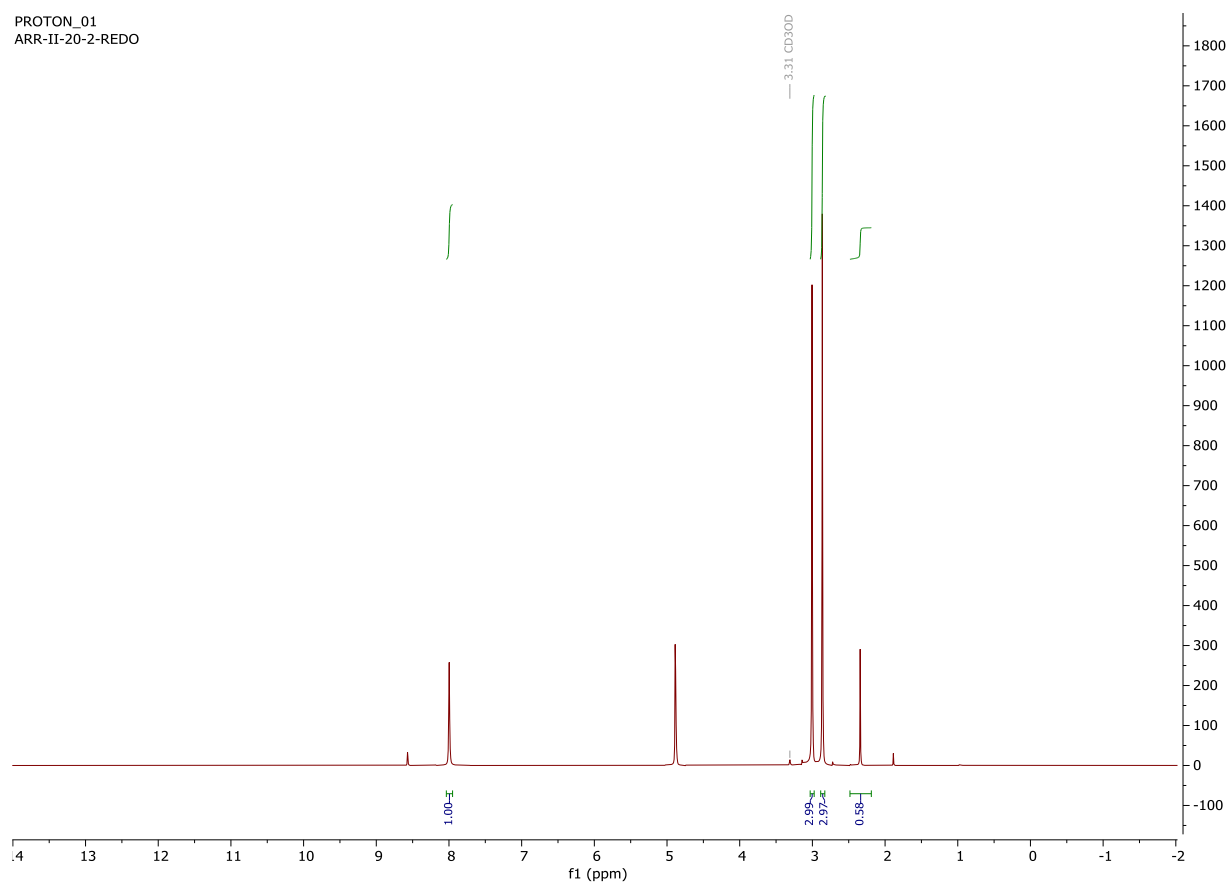

Figure S37: Quantitative <sup>1</sup>H Spectrum of product mixture for table S3, entry 6 in CD<sub>3</sub>OD.



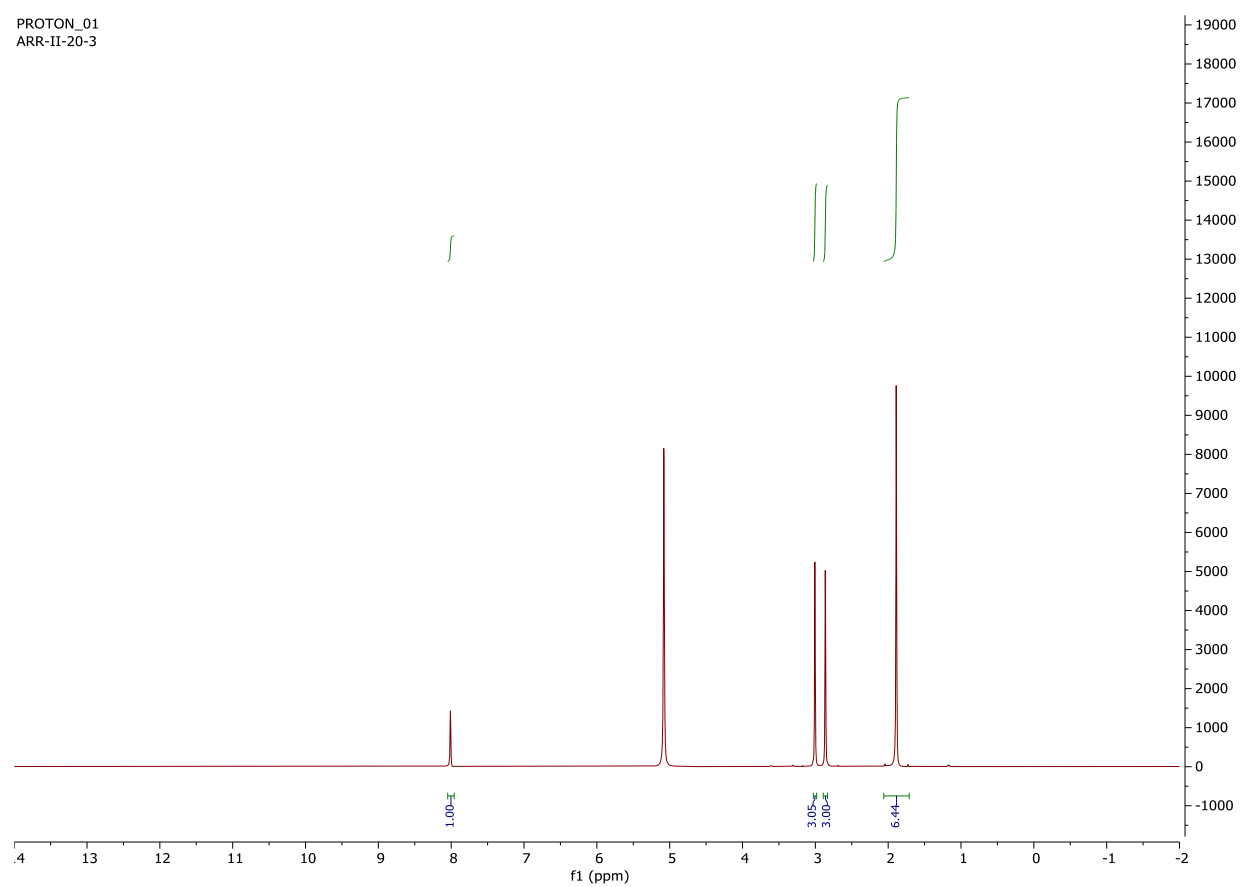

**Figure S38:** Quantitative <sup>1</sup>H Spectrum of product mixture for table S3, entry 7 in CD<sub>3</sub>OD.

### Large Scale Reaction Utilizing Catalyst **10**

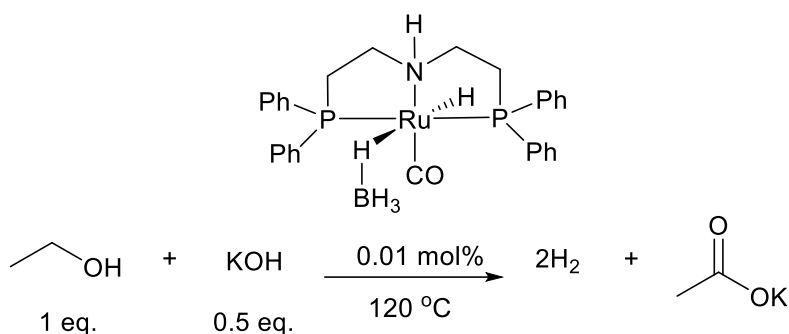

In a nitrogen filled glovebox, of potassium hydroxide (6.40 g, 98 mmol) was weighed out in a 250 mL round bottom flask with **10** (11.3 mg, 0.01 mol%, 19.3 μmol) and a stir bar. To this were added toluene (100 mL, distilled from benzophenone ketyl) and ethanol (200 proof, 9.2 g, 11.66 mL, 200 mol). The resulting solution was brought out of the glovebox, attached to a condenser, sealed with a septum, and brought to reflux in a 120 °C oil bath. Gas production was monitored by water eudiometry. Once gas evolution ceased (ca. 155 hrs), the flask was removed from the condenser under inert gas flow, sealed, and returned to the glovebox, where the solids were filtered and washed with minimal toluene. The solid was added back to the round bottom flask and dried under vacuum after which a quantitative NMR was prepared using CD<sub>3</sub>OD (1 mL) and DMF (82 mg, 1.12 mmol) as an internal standard (Table S4, entry 1). After NMR, the product was dried on a rotary evaporator under reduced pressure and diluted in deionized water (50 mL); this was back titrated with dilute hydrochloric acid (0.1996 M) and sodium hydroxide (0.2005 M) solutions. The resulting toluene solution from filtration was added to a clean, dry 250 mL round bottom flask, recharged with more potassium hydroxide (6.40 g, 98.0 mmol) and ethanol (200 proof, 9.20 g, 11.7 mL, 200 mmol) and was rerun (entry 2). This was repeated a third time (entry 3).

**Table S4: Results of Large-Scale Reactions of **10****

| Entry | Scale (g) | EtOH (eq) | KOH (eq) | Temp (°C) | Acetate (%)     | Carboxylates (mol%) <sup>b</sup> | Total TON |
|-------|-----------|-----------|----------|-----------|-----------------|----------------------------------|-----------|
| 1     | 10        | 1         | 0.5      | 120       | 30              | 30                               | 4646      |
| 2     | 10        | 1         | 0.5      | 120       | 20              | 43                               | 8187      |
| 3     | 10        | 1         | 0.5      | 120       | ND <sup>a</sup> | 36                               | 55,000    |

<sup>a</sup> Not determined. <sup>b</sup> Molar percent carboxylates determined by titration.

### NMR Spectra for Large-Scale Reactions with Catalyst 10

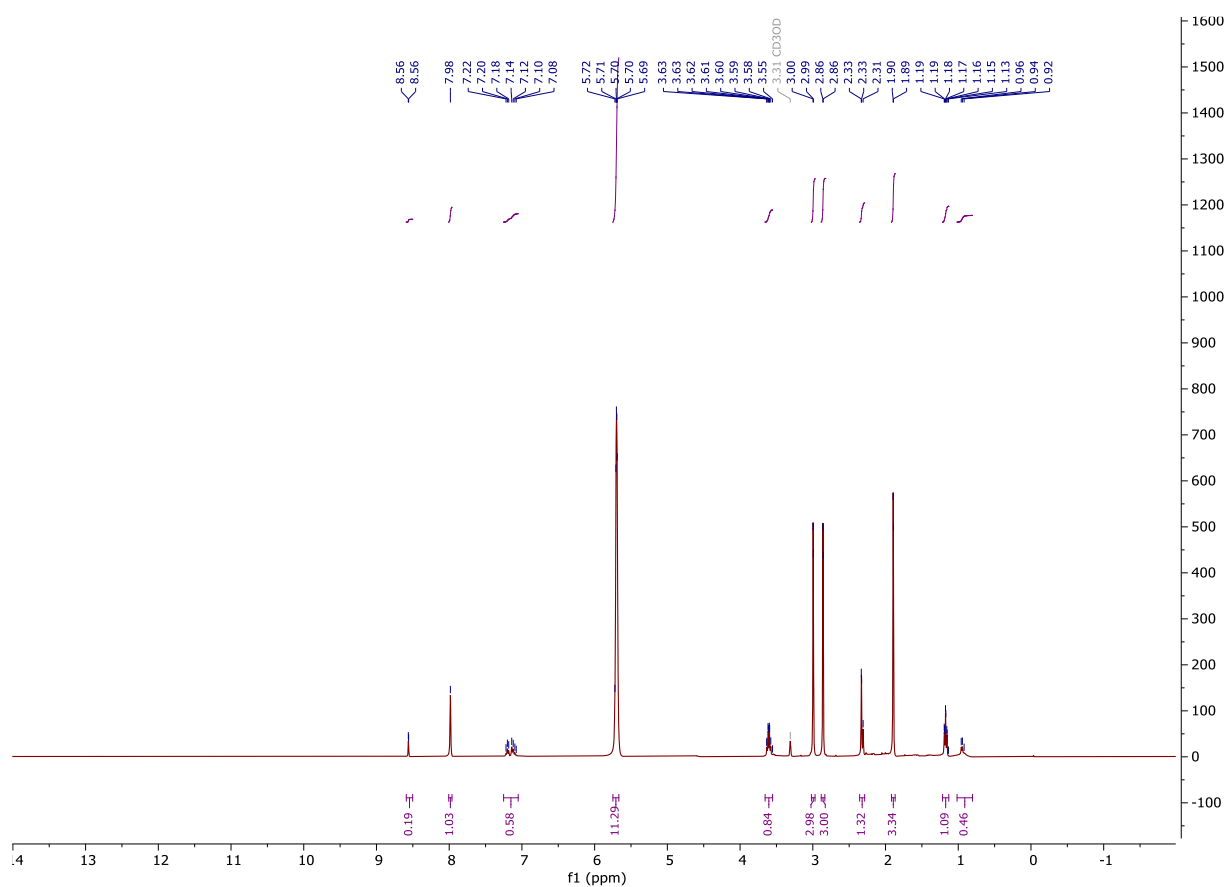

Figure S39: Quantitative  $^1\text{H}$  spectrum of table S4, entry 1 product mixture in  $\text{CD}_3\text{OD}$ .

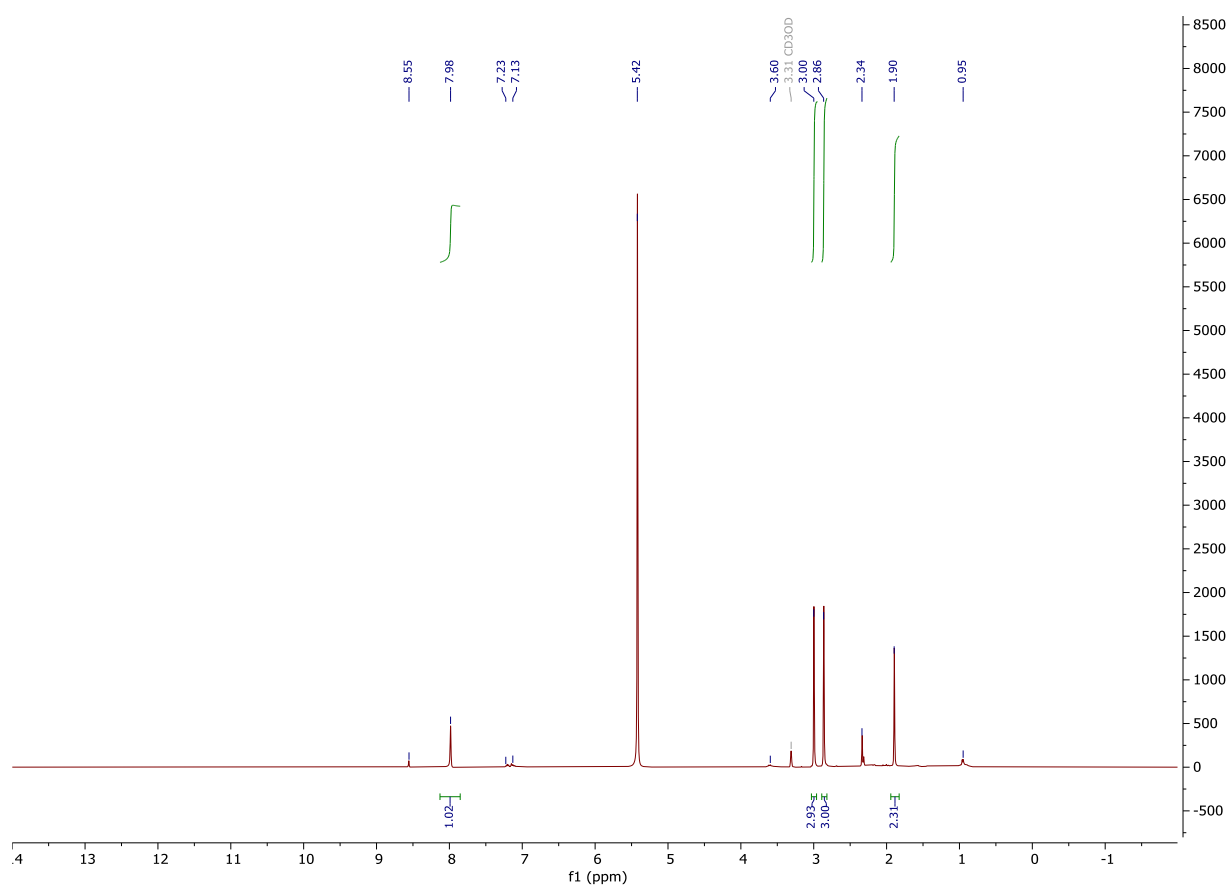

Figure S40: Quantitative  $^1\text{H}$  spectrum of table S4, entry 2 product mixture in  $\text{CD}_3\text{OD}$ .

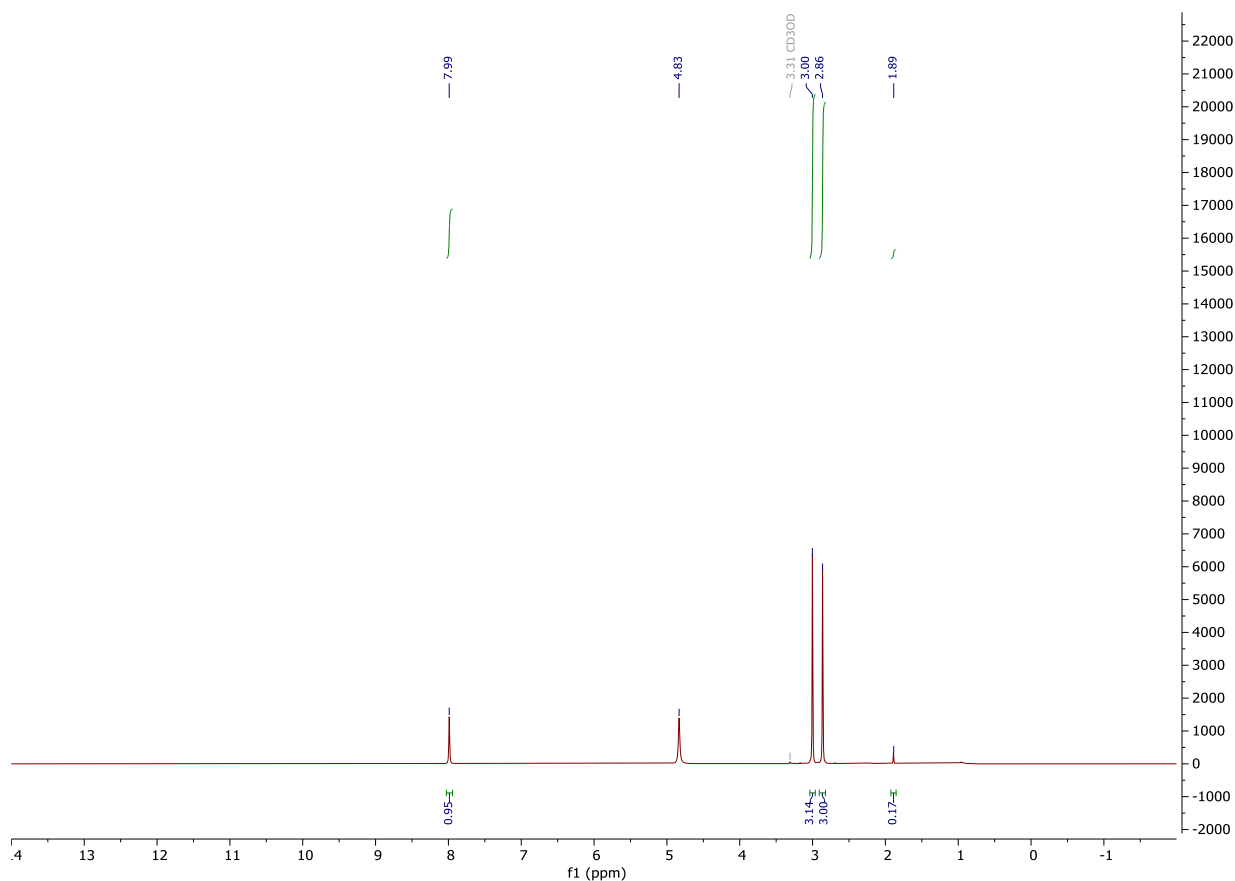

Figure S41: Quantitative  $^1\text{H}$  spectrum of table S4, entry 3 product mixture in  $\text{CD}_3\text{OD}$ .

TON During Table S4, Entry 3 Utilizing Catalyst 10

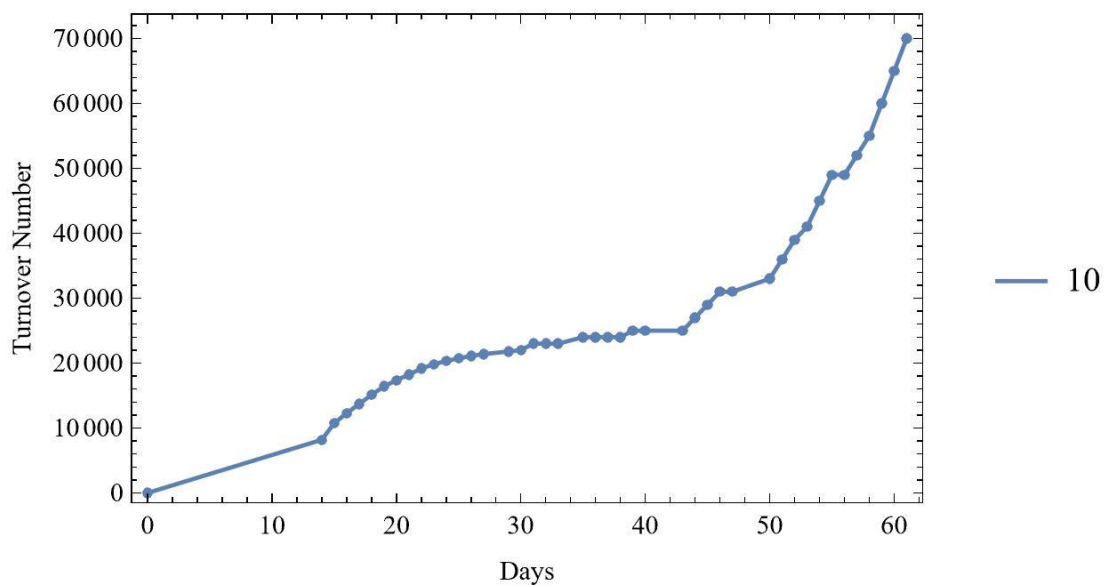

Figure S42: TON of table S4, entry 3 over 60 days.

### Large Scale Reaction Utilizing Catalyst 1

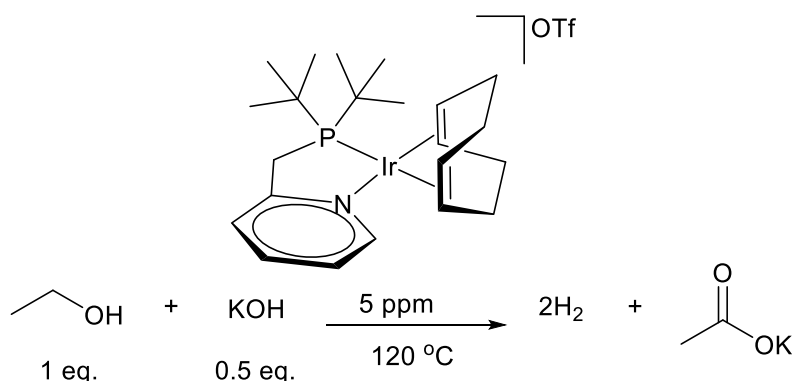

In a nitrogen filled glovebox, of potassium hydroxide (6.40 g, 98.0 mmol) was weighed out in a 250 mL round bottom flask with **1** (0.657 mg, 5 ppm, 0.96  $\mu\text{mol}$ ) and a stir bar. To this were added toluene (100 mL, distilled from benzophenone ketyl) and ethanol (200 proof, 9.20 g, 11.7 mL, 200 mmol). The resulting solution was brought out of the glovebox, attached to a condenser, sealed with a septum, and brought to reflux in a 120 °C oil bath. Gas production was monitored by water eudiometry. Once gas evolution ceased (ca. 88 days), the flask was removed from the condenser under inert gas flow, sealed, and returned to the glovebox, where the solids were filtered and washed with minimal toluene. The solid was added back to the round bottom flask and removed from the glovebox where it was diluted in deionized water and extracted with dichloromethane. Both phases were dried on a rotary evaporator under reduced pressure; the organic layer was diluted in  $\text{CDCl}_3$  (0.7 mL), and NMR was taken. The resulting solid after drying from the aqueous phases was diluted in deionized water (50 mL) and subsequently back titrated with dilute hydrochloric acid (0.1885 M) and sodium hydroxide (0.192 M) solutions.

**Table S5: Result of Large-Scale Reaction Utilizing 1**

| Entry | Scale (g) | EtOH (eq) | KOH (eq) | Temp (°C) | Acetate (%) | Carboxylates (mol%) <sup>b</sup> | Total TON |
|-------|-----------|-----------|----------|-----------|-------------|----------------------------------|-----------|
| 1     | 10        | 1         | 0.5      | 120       | ND          | 84                               | 168,000   |

<sup>a</sup> Not determined. <sup>b</sup> Molar percent carboxylates determined by titration.

### <sup>1</sup>H NMR Spectrum of a Large-Scale Reaction Using Catalyst 1

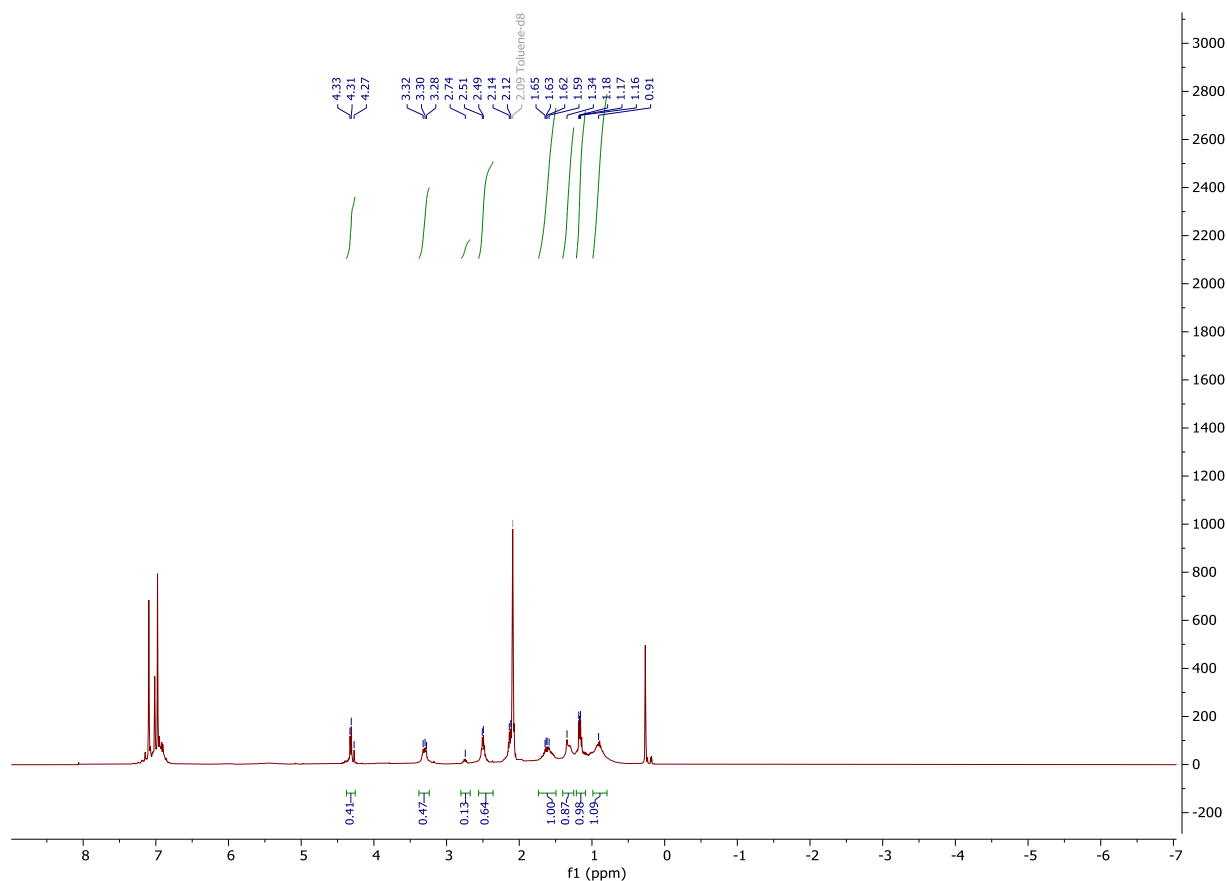

**Figure S43:** <sup>1</sup>H spectrum of organics from table S5, entry 1 in toluene-*d*<sub>8</sub>.

TON During Large Scale Reaction Using Catalyst 1

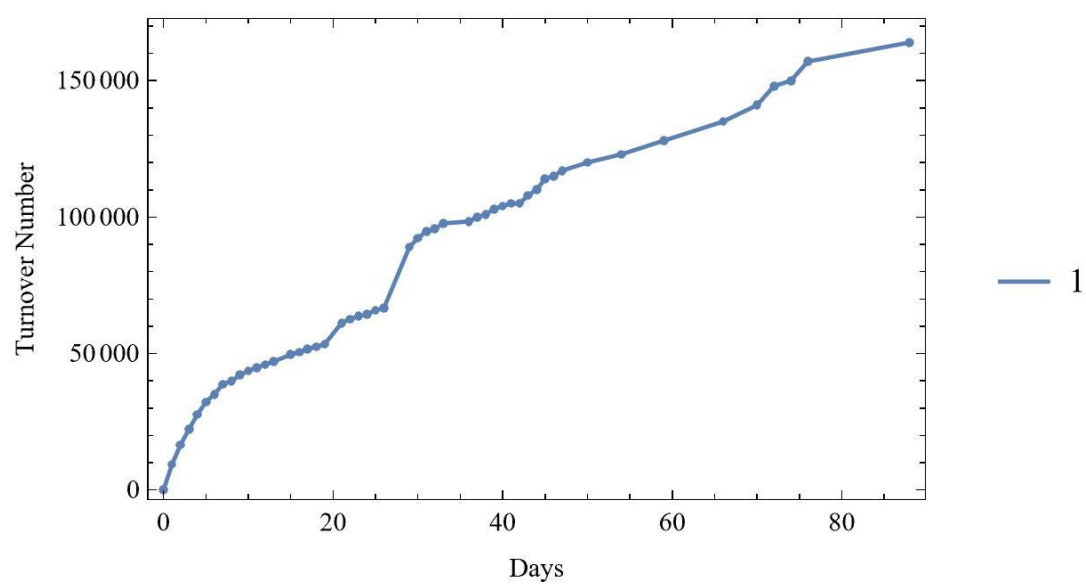

Figure S44: TON over 88 days.

### Large Scale Reaction Utilizing Catalyst 5

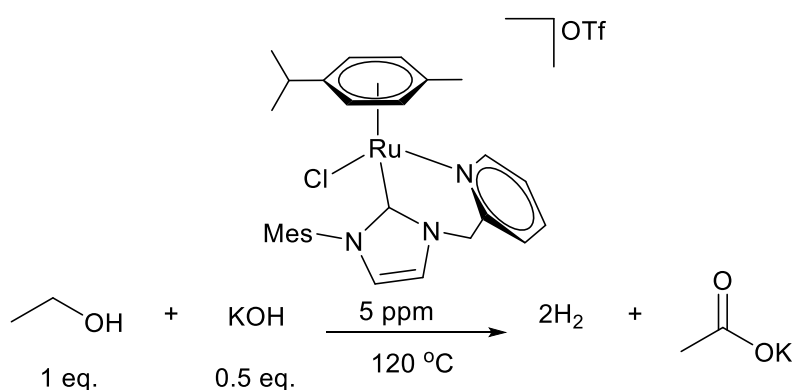

In a nitrogen filled glovebox, of potassium hydroxide (4.70 g, 72.0 mmol) was weighed out in a 100 mL round bottom flask with **5** (0.03 mg, 5 ppm, 0.07  $\mu$ mol) and a stir bar. To this were added toluene (30 mL, distilled from benzophenone ketyl) and ethanol (200 proof, 4.70 g, 1.17 mL, 100 mmol). The resulting solution was brought out of the glovebox, attached to a condenser, sealed with a septum, and brought to reflux in a 120 °C oil bath. Gas production was monitored by water eudiometry. Once gas evolution ceased (ca. 21 days), the flask was removed from the condenser under inert gas flow, sealed, and returned to the glovebox, where the solids were filtered and washed with minimal toluene. The solid was added back to the round bottom flask, removed from the glovebox, dried on a rotary evaporator under reduced pressure after which a quantitative NMR was prepared using CD<sub>3</sub>OD (1 mL) and DMF (237 mg, 3.24 mmol) as an internal standard (Table S6, entry 1). After NMR, the product was dried on a rotary evaporator under reduced pressure and the resulting solid was diluted in deionized water (50 mL); this was back titrated with dilute hydrochloric acid (0.1885 M) and sodium hydroxide (0.192 M) solutions.

Table S6: Results of Large-Scale Reaction of **5**

| Entry | Scale (g) | EtOH (eq) | KOH (eq) | Temp (°C) | Acetate (%) | Carboxylates (mol%) <sup>b</sup> | Total TON |
|-------|-----------|-----------|----------|-----------|-------------|----------------------------------|-----------|
| 1     | 10        | 1         | 0.5      | 120       | ND          | 55%                              | 168,000   |

<sup>a</sup> Not determined. <sup>b</sup> Molar percent carboxylates determined by titration.

### <sup>1</sup>H NMR Spectrum of a Large-Scale Reaction Utilizing Catalyst 5

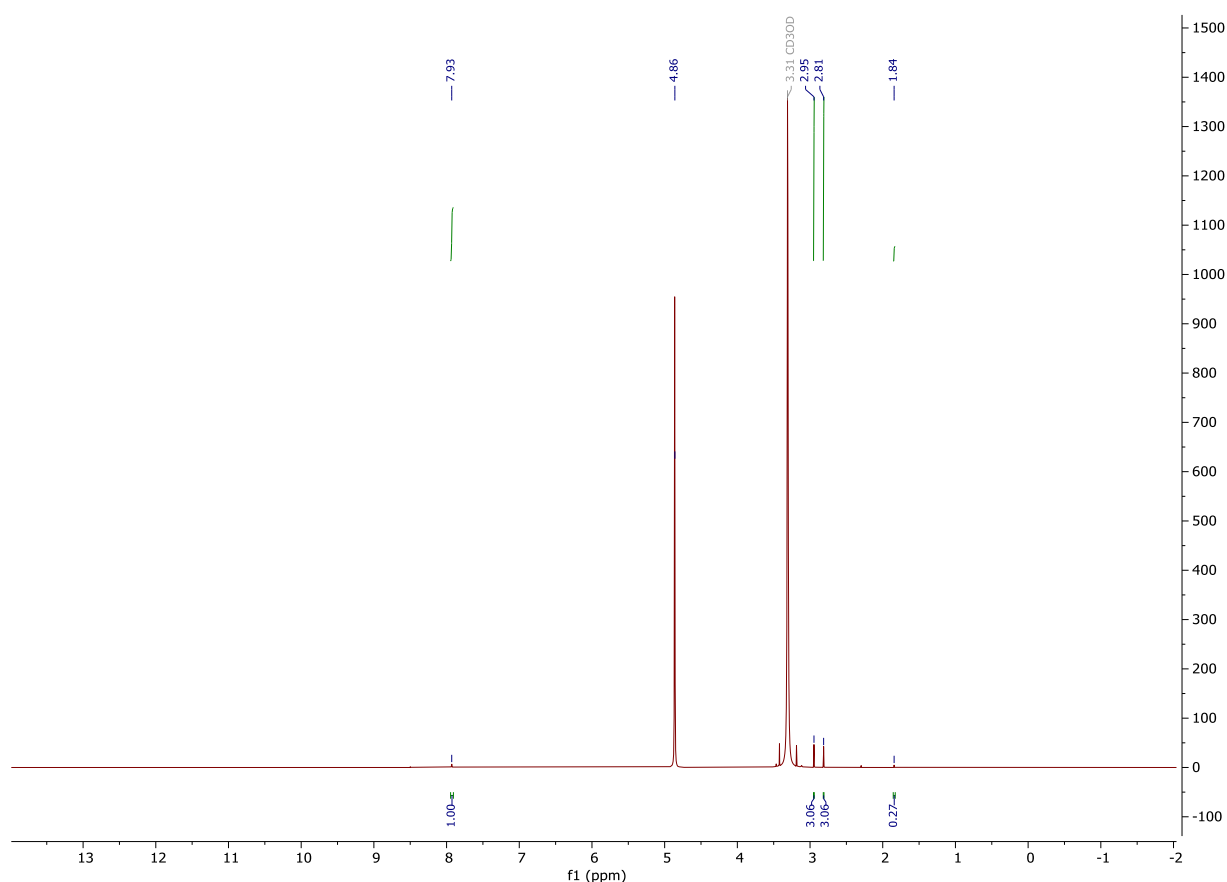

Figure S45: <sup>1</sup>H Spectrum of product mixture in CD<sub>3</sub>OD.

### TON During Large Scale Reaction Using Catalyst 5

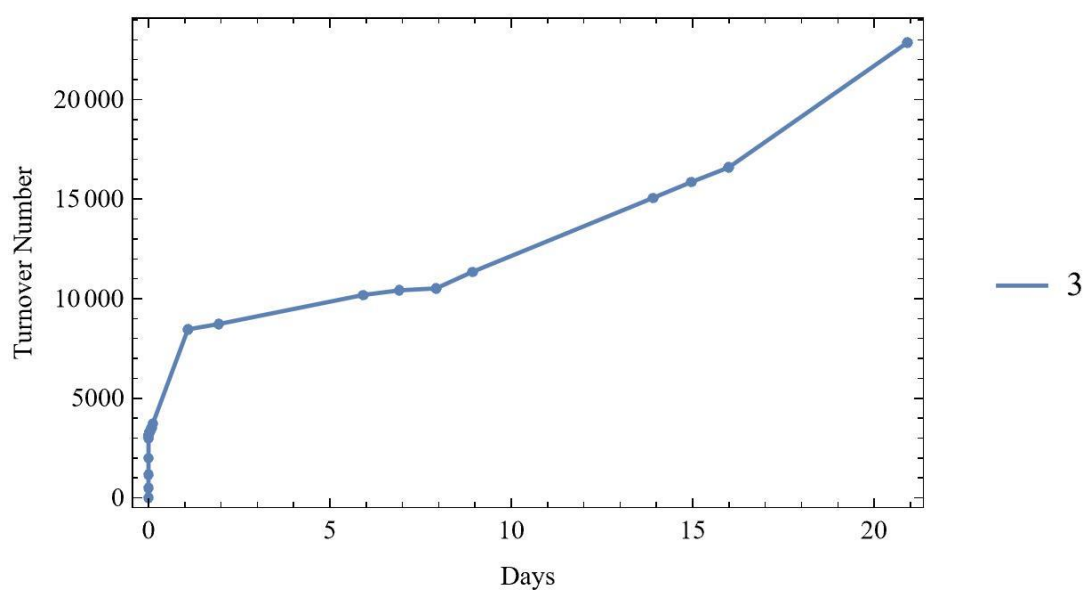

Figure S46: TON over 21 days.



### Self-Pressurizing Optimization Reactions

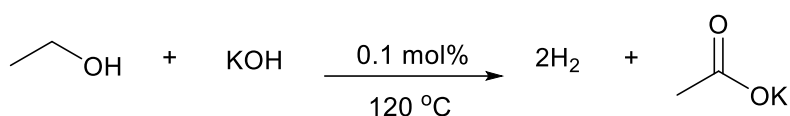

Several reactions (Table S7) were done with varying amounts of reagents, solvent, or additives. In a representative procedure, in a nitrogen filled glovebox, potassium hydroxide (0.5 equiv = 1.84 g, 28.3 mmol), catalyst (**1**, 0.1 mol%, 60  $\mu\text{mol}$ , with respect to ethanol unless otherwise noted), toluene (10 mL, distilled from benzophenone ketyl), and ethanol (200 proof, 2.64 g, 3.34 mL, 57.0 mmol) were added to a 125 mL Parr high pressure reactor with an analog pressure gauge. Each reaction was sealed in the Parr reactor and heated to a bath temperature of 120  $^\circ\text{C}$ . Gas production was measured by monitoring pressure readings from the reactor. After 42 hours, each reaction was quantitatively transferred to a 50 mL round bottom flask (rinsing with deionized water) and dried on a rotary evaporator under reduced pressure. Quantitative NMR samples were prepared with methanol-*d*<sub>4</sub> (1 mL) and dimethylformamide (DMF 96.2 mg, 1.32 mmol) and subsequently analyzed by <sup>1</sup>H NMR. The remainder of each sample was diluted in 50 mL of deionized water and titrated to determine the molar percentage of acetate in the sample. After NMR, the product was dried on a rotary evaporator under reduced pressure and the resulting residue was diluted in deionized water (50 mL); this was back titrated with dilute hydrochloric acid (0.1967 M) and sodium hydroxide (0.1928 M) solutions.

**Table S7: Results of Self-Pressurizing Reaction Optimization**

| Entry | Cat.      | EtOH (eq) | KOH (eq) | Solvent | Time (hrs) | Solvent (mL) | Final Pressure (Bar) | Acetate (%) | Carboxylates (mol%) <sup>b</sup> |
|-------|-----------|-----------|----------|---------|------------|--------------|----------------------|-------------|----------------------------------|
| 1     | <b>1</b>  | 1         | 1        | Toluene | 45         | 10           | 8                    | 64          | 67                               |
| 2     | <b>1</b>  | 1         | 0.5      | Toluene | 25         | 10           | 6                    | 28          | 50                               |
| 3     | <b>5</b>  | 1         | 1        | Toluene | 47.1       | 10           | 9                    | 66          | 70                               |
| 4     | <b>10</b> | 1         | 1        | Toluene | 45         | 10           | 9                    | 82          | 74                               |
| 5     | <b>10</b> | 1         | 0.5      | Toluene | 45         | 10           | 14                   | 95          | 98                               |
| 6     | <b>10</b> | 0.5       | 1        | Toluene | 48         | 10           | 10                   | 57          | 47                               |
| 7     | <b>10</b> | 1         | 0.17     | Neat    | 68         | Neat         | 26                   | 100         | 97                               |

<sup>a</sup> Catalyst loading based on moles of ethanol. <sup>b</sup> Molar percent acetate determined by titration. Calculated to pressurize to 30 bar.

### <sup>1</sup>H NMR Spectra of Self-Pressurizing Optimization

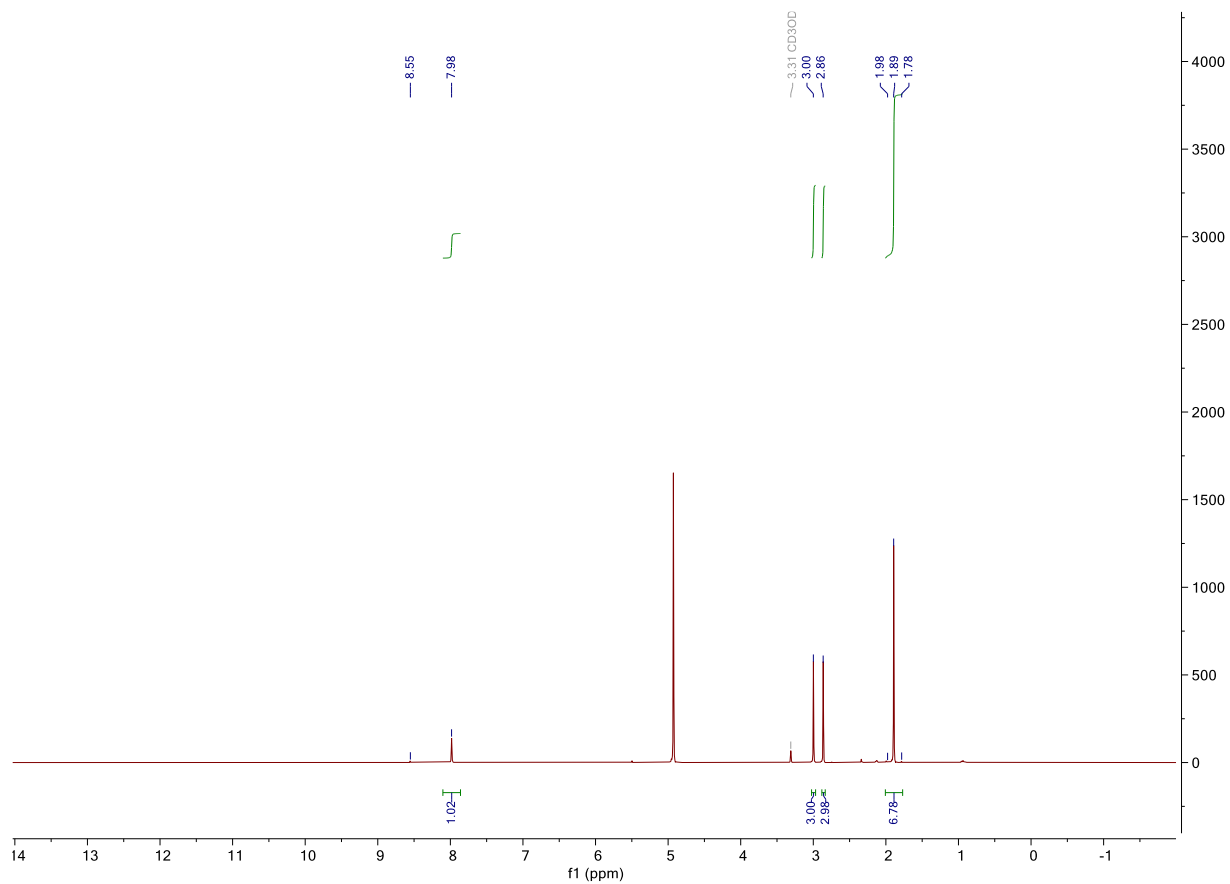

Figure S47: Quantitative <sup>1</sup>H spectrum of the table S7, entry 1 reaction mixture in CD<sub>3</sub>OD.

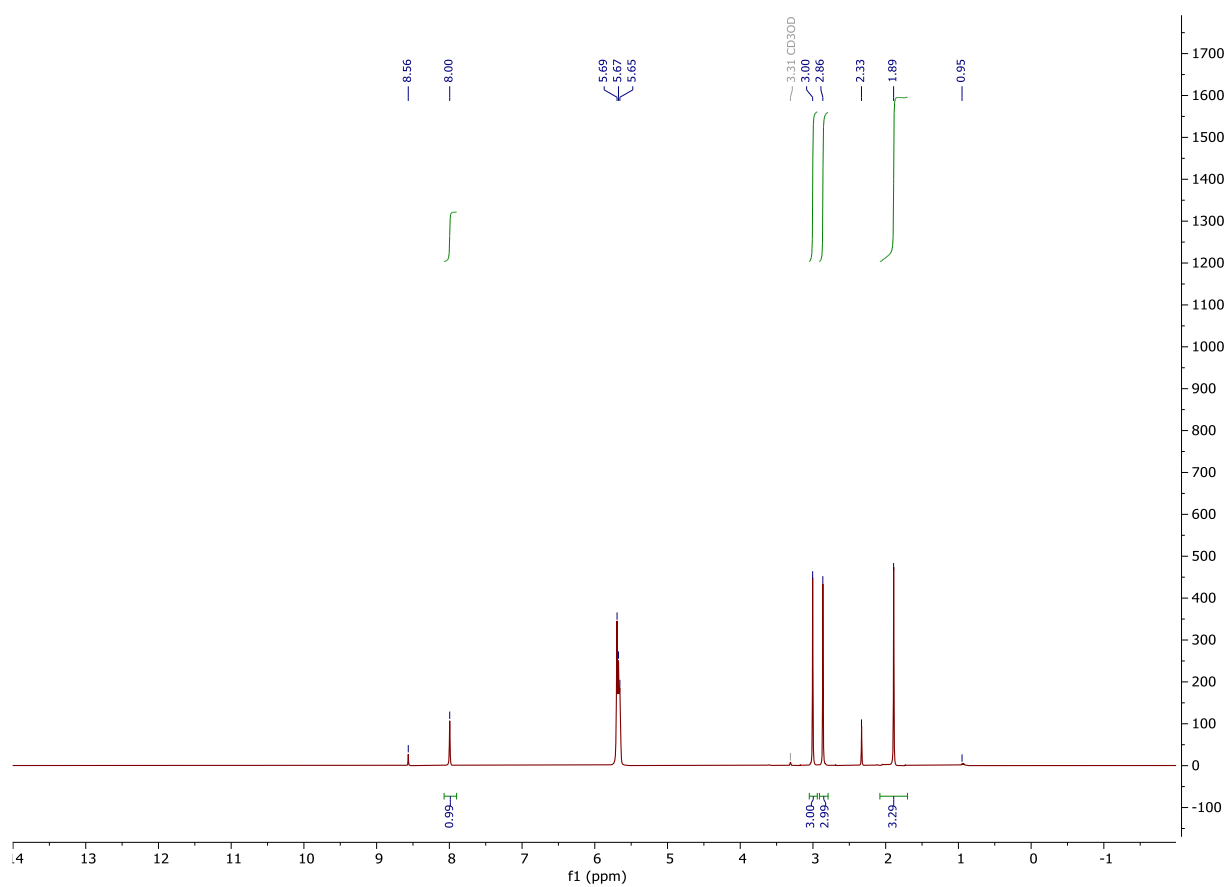

Figure S48: Quantitative <sup>1</sup>H spectrum of the table S7, entry 2 reaction mixture in CD<sub>3</sub>OD.

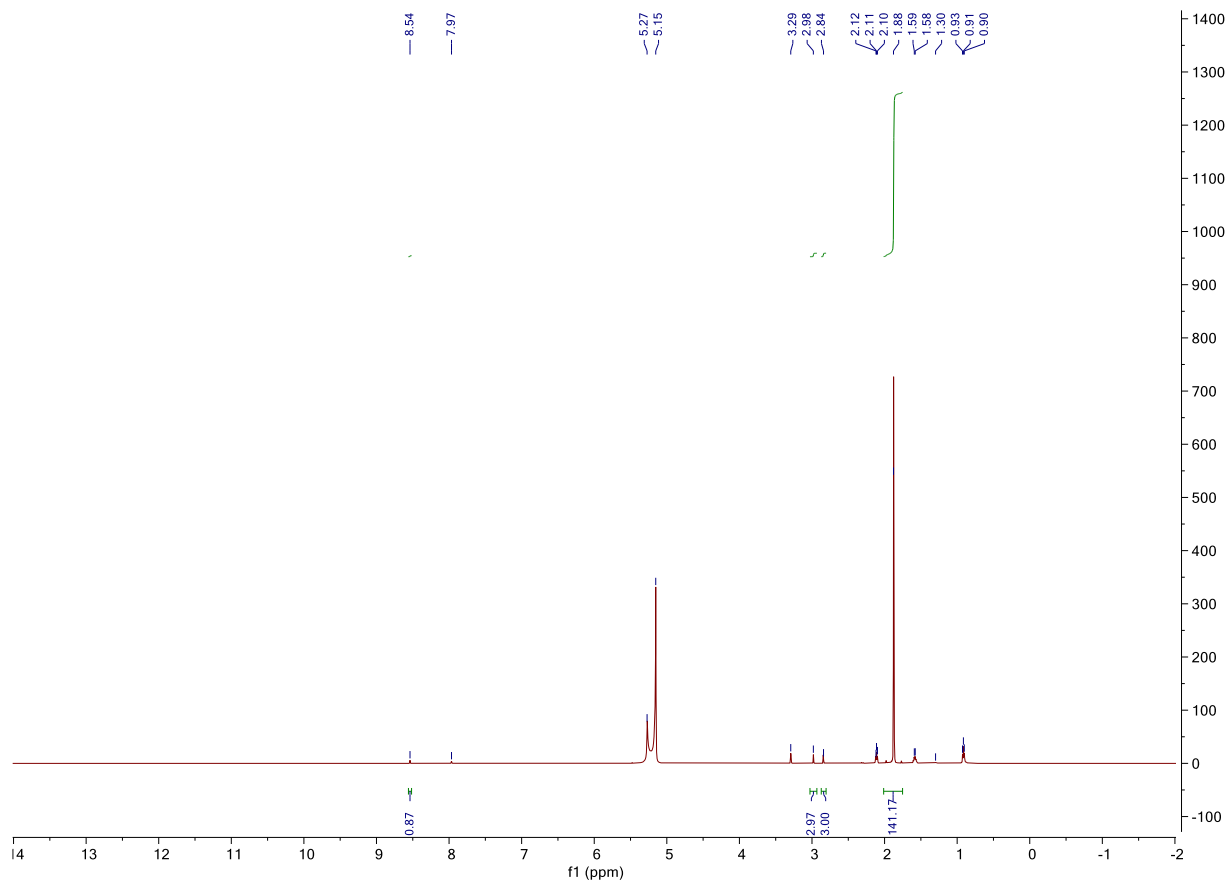

Figure S49: Quantitative  $^1\text{H}$  spectrum of the table S7, entry 4 reaction mixture in  $\text{CD}_3\text{OD}$ .

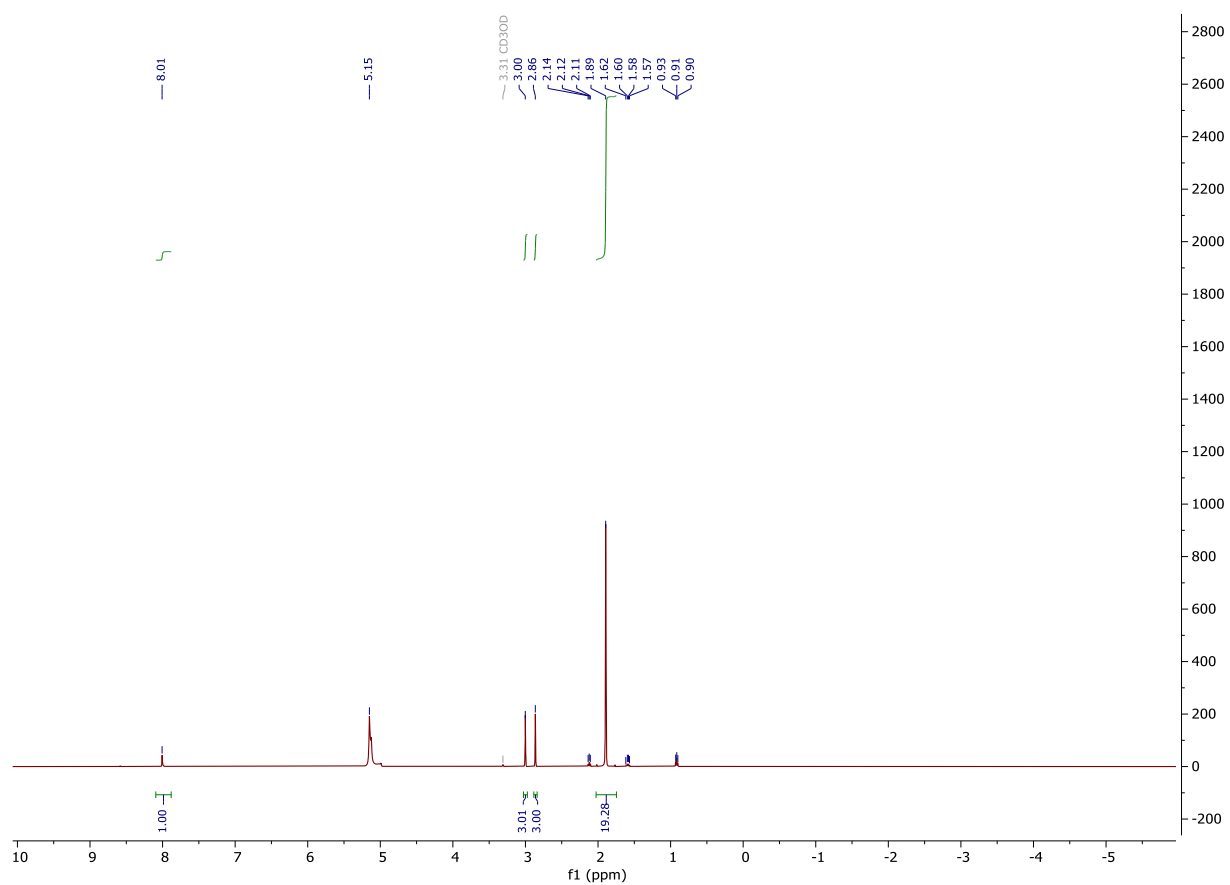

Figure S50: Quantitative  $^1\text{H}$  spectrum of the table S7, entry 5 reaction mixture in  $\text{CD}_3\text{OD}$ .

PROTON\_01  
ARR-II-29

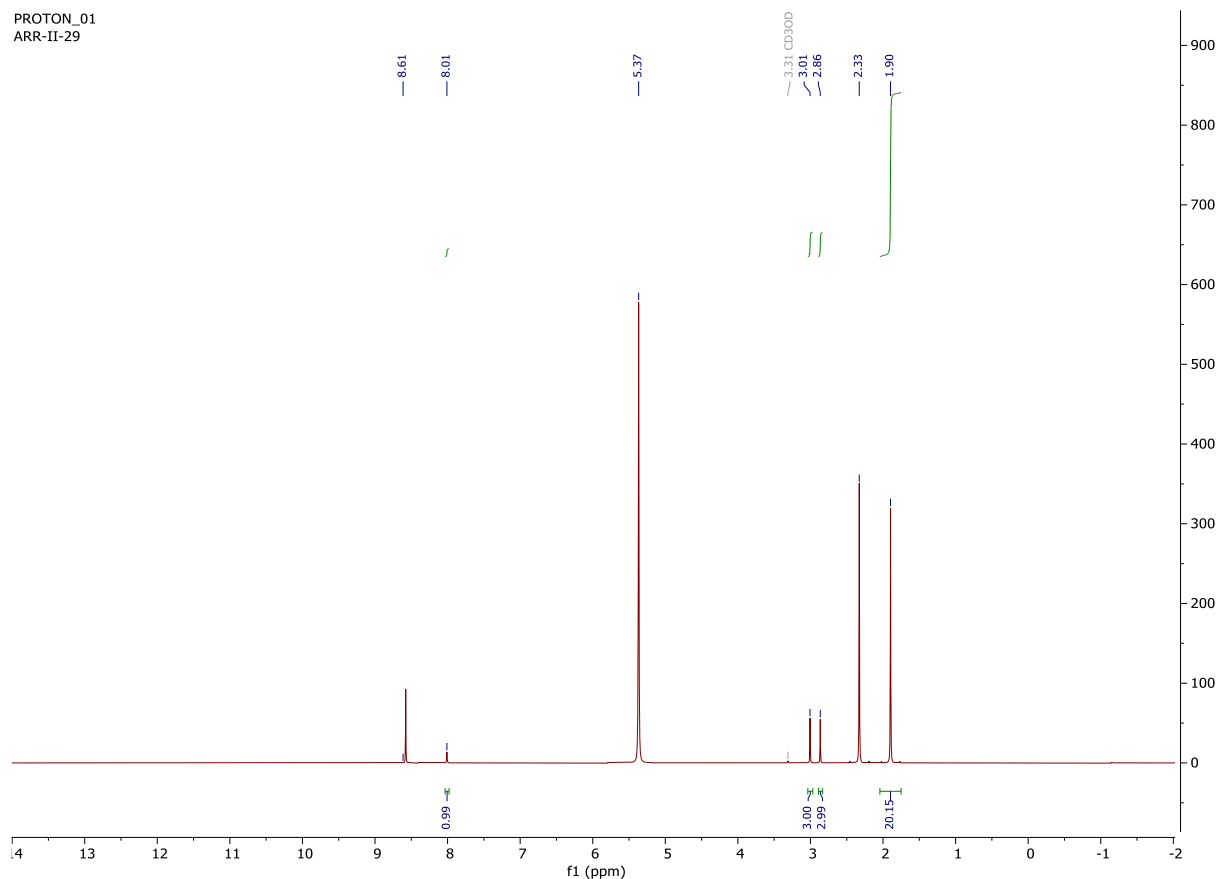

Figure S51: Quantitative  $^1\text{H}$  spectrum of the table S7, entry 6 reaction mixture in  $\text{CD}_3\text{OD}$ .

PROTON\_01  
ARR-II-28

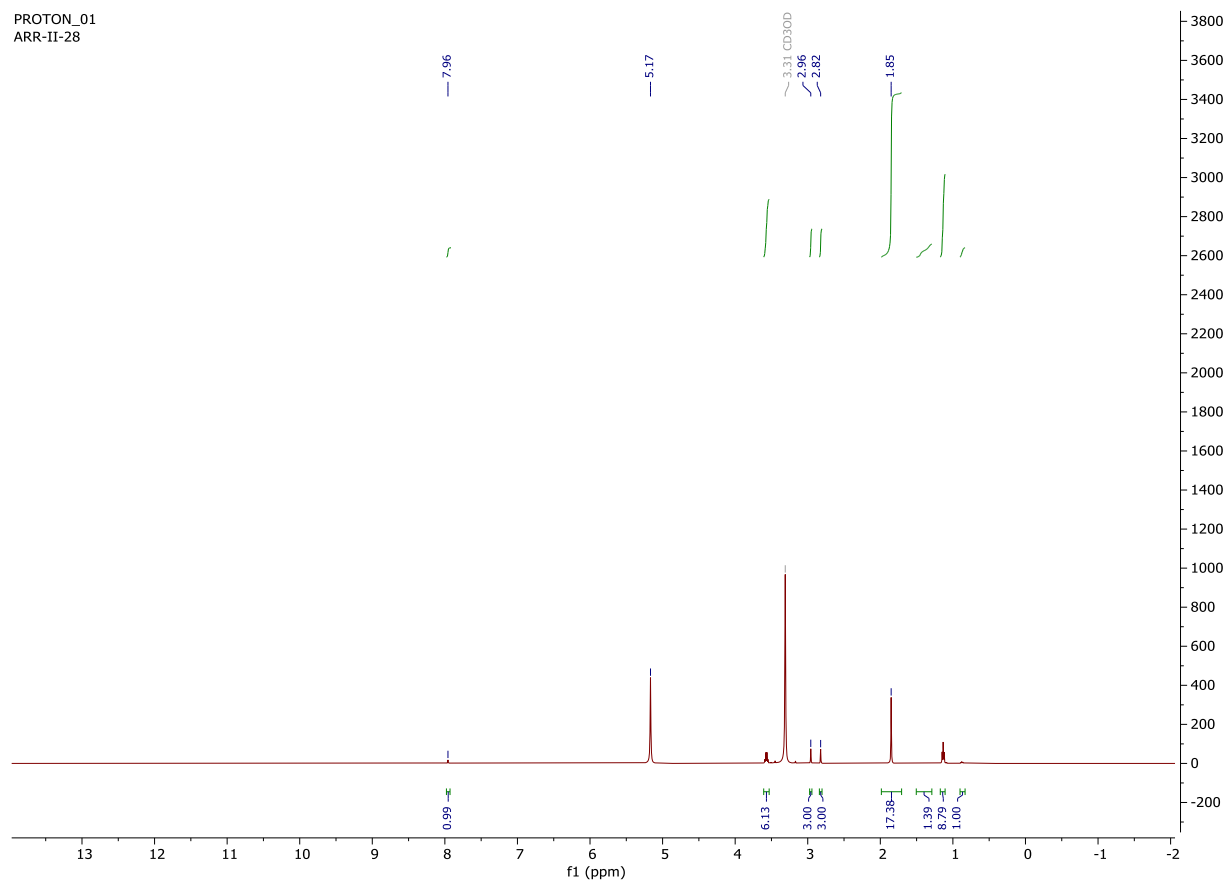

Figure S52: Quantitative  $^1\text{H}$  spectrum of the table S7, entry 7 reaction mixture in  $\text{CD}_3\text{OD}$ .

### Other Additives Reactions

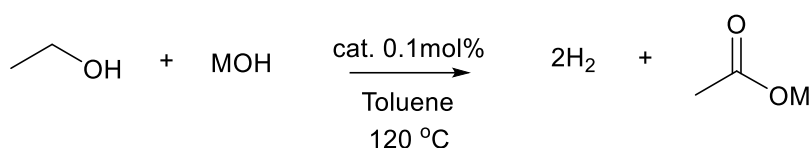

In a nitrogen filled glovebox, ethanol (0.92 g, 20 mmol), base (10 mmol hydroxide equivalents), and toluene (10 mL, distilled from benzophenone ketyl) were combined with **10** (11.7 mg, 20.0  $\mu$ mol) in a 25 mL round bottom flask. Outside the glovebox, each flask was added a reflux condenser outfitted with a septum, refluxed for 42 hours at 120 °C. Gas production was measured by water eudiometry, attached through a needle. After 42 hours, volatiles removed using a rotary evaporator and quantitative NMR was taken using dimethyl formamide (67.1 mg, 0.918 mmol) as an internal standard in CD<sub>3</sub>OD (1 mL). After NMR analysis, volatiles were again removed using a rotary evaporator under reduced pressure and the resulting solid was diluted in water (50 mL, deionized) and titrated using dilute hydrochloric acid (0.1967 M) and sodium hydroxide (0.1928 M) solutions.

**Table S8: Results of Other Additive Reactions**

| Entry | Cat.      | EtOH (eq) | MOH (eq) | Base                | Solvent (mL) | Acetate (%) | Carboxylates (mol%) <sup>b</sup> |
|-------|-----------|-----------|----------|---------------------|--------------|-------------|----------------------------------|
| 1     | <b>10</b> | 1         | 1        | Ca(OH) <sub>2</sub> | 10           | 2           | 12                               |
| 2     | <b>10</b> | 1         | 0.5      | NaOH                | 10           | 83          | 98                               |

<sup>a</sup>Catalyst loading based on moles of ethanol. <sup>b</sup>Molar percent acetate determined by titration. All at ambient pressure.

### NMR Spectra of Other Additive Reactions

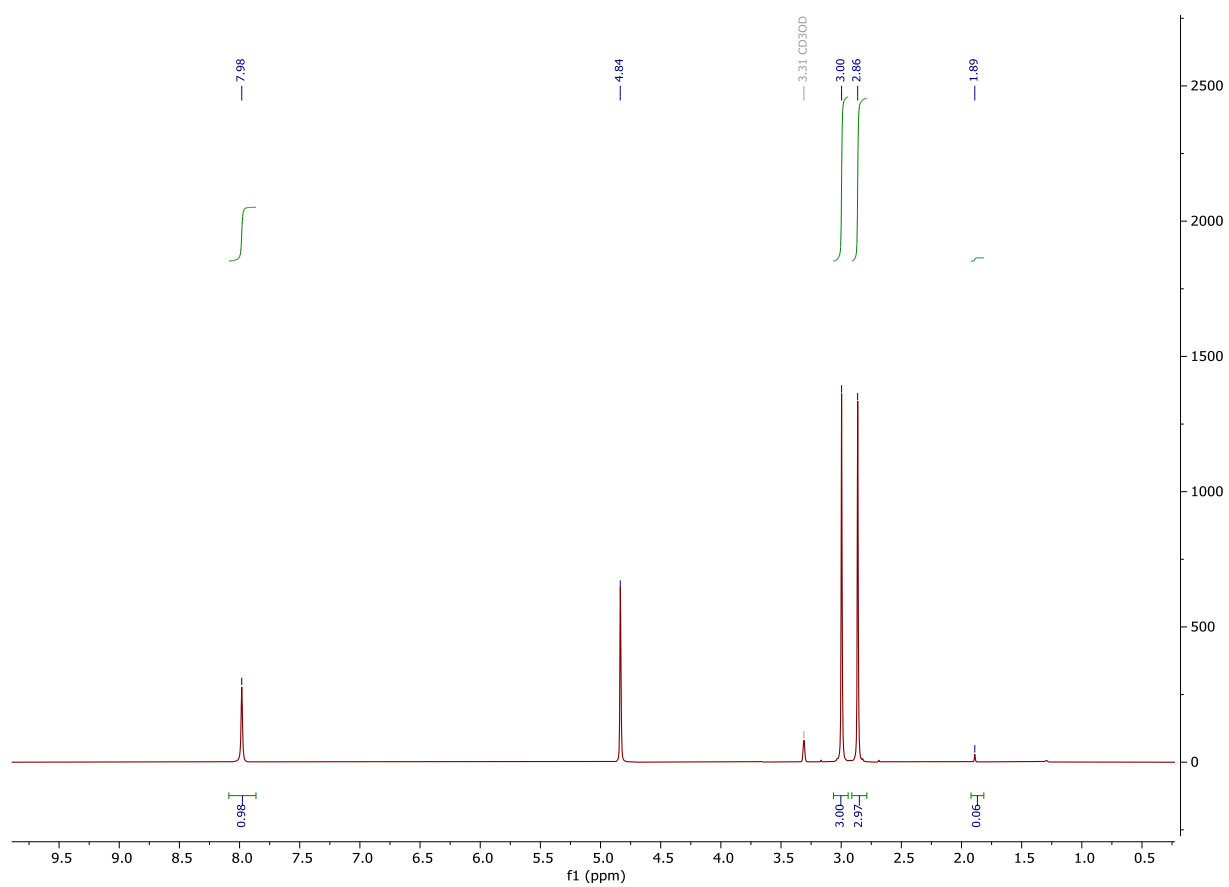

Figure S53: Quantitative <sup>1</sup>H spectrum of the table S8, entry 1 reaction mixture in CD<sub>3</sub>OD.

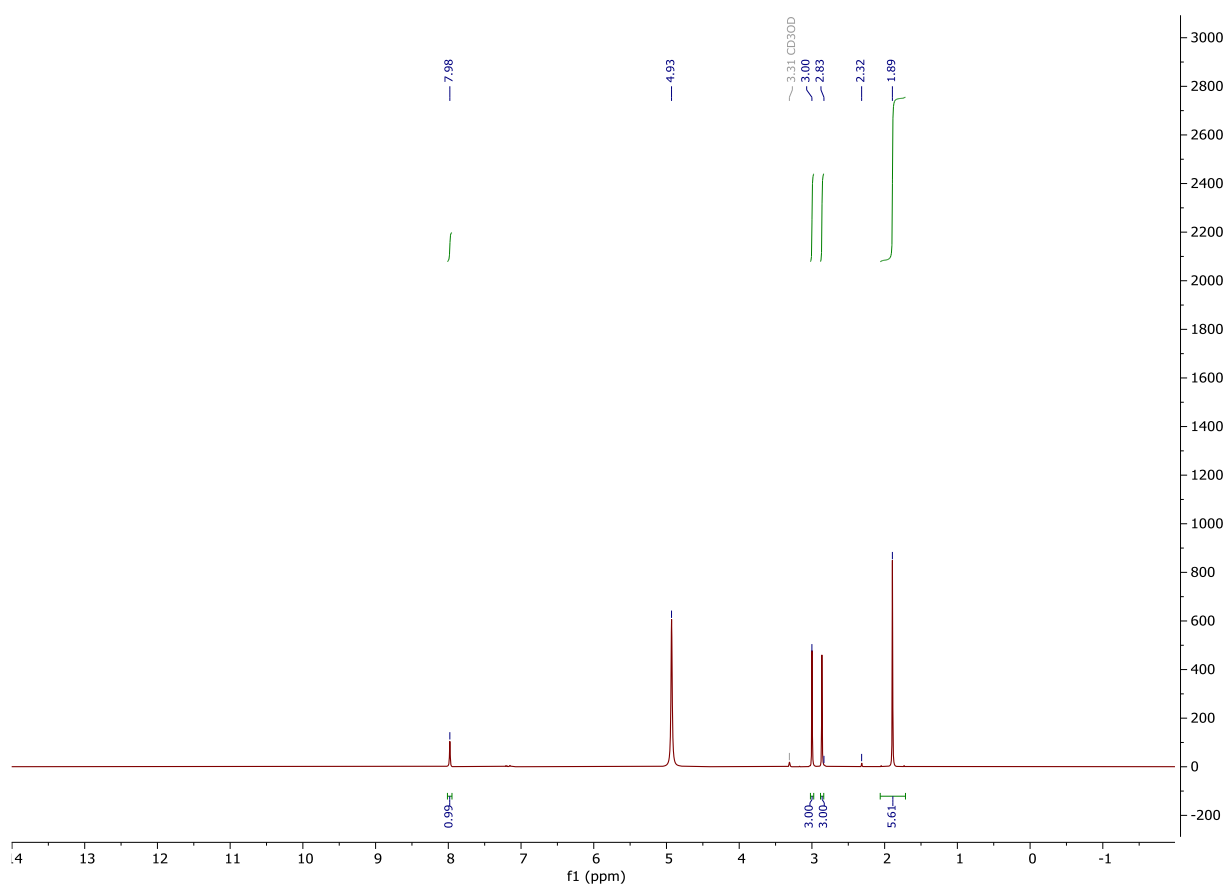

Figure S54: Quantitative <sup>1</sup>H spectrum of the table S8, entry 2 reaction mixture in CD<sub>3</sub>OD.

### Acetate Hydrogenation Reactions

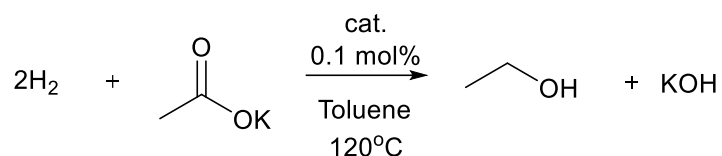

In a nitrogen filled glovebox, potassium acetate (2.94 g, 30.0 mmol), catalyst (**8** or **10**, 0.1 mol% with respect to acetate, entry 1: 17.6 mg, 30.0  $\mu\text{mol}$ ), and toluene (10 mL, distilled from benzophenone ketyl) were added to a 125 mL Parr high pressure reactor with an analog pressure gauge. Each reaction was sealed in the Parr reactor and charged with 17 bar of hydrogen pressure. The reactor was then placed in an oil bath temperature at 120 °C. Gas production was measured by monitoring pressure readings from the reactor. After 42 hours, an aliquot of the head space was taken in a gas chromatography sampling bag and run through GCMS. The pH was tested of each reaction, and then each reaction was quantitatively transferred to a 50 mL round bottom flask (rinsing with deionized water) and dried on a rotary evaporator under reduced pressure. Quantitative NMR samples were prepared with methanol- $d_6$  (1 mL) and dimethylformamide (135 mg, 1.84 mmol) and subsequently analyzed by  $^1\text{H}$  NMR. After NMR, solvent was removed on a rotary evaporator and resulting residue was diluted in deionized water (50 mL); this was back titrated with dilute hydrochloric acid (0.2239 M) and sodium hydroxide (0.3454 M) solutions.

**Table S9: Results of Acetate Hydrogenation Reactions**

| Entry | Cat.      | H <sub>2</sub> Pressure (Bar) | Final Pressure (Bar) <sup>a</sup> | Cat. Loading (mol%) | Acetate (%) <sup>b</sup> | Carboxylates (mol%) <sup>c</sup> |
|-------|-----------|-------------------------------|-----------------------------------|---------------------|--------------------------|----------------------------------|
| 1     | <b>10</b> | 17                            | 10                                | 0.1                 | 100                      | 99                               |
| 2     | <b>8</b>  | 17                            | 17                                | 0.1                 | 100                      | 99                               |

<sup>a</sup> Pressure taken at 25 °C. <sup>b</sup> With respect to acetate with DMF as an internal standard. <sup>c</sup> Determined by titration.

### Acetate Hydrogenation NMR Spectra

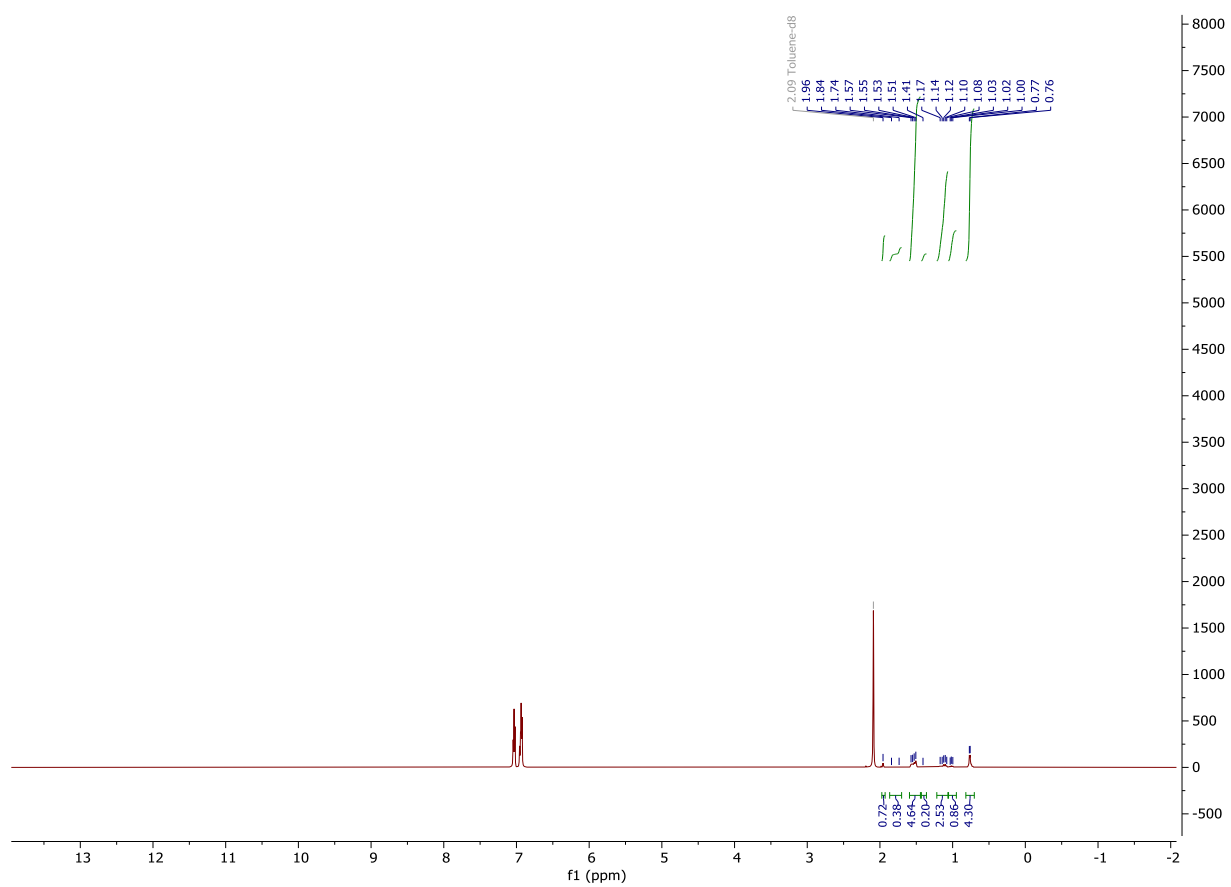

**Figure S55:**  $^1\text{H}$  Spectrum of table S9 entry 1 reaction mixture in  $d_8$ -toluene. This suggests the hydrogenation of the solvent to methyl cyclohexane. No ethanol is observed.

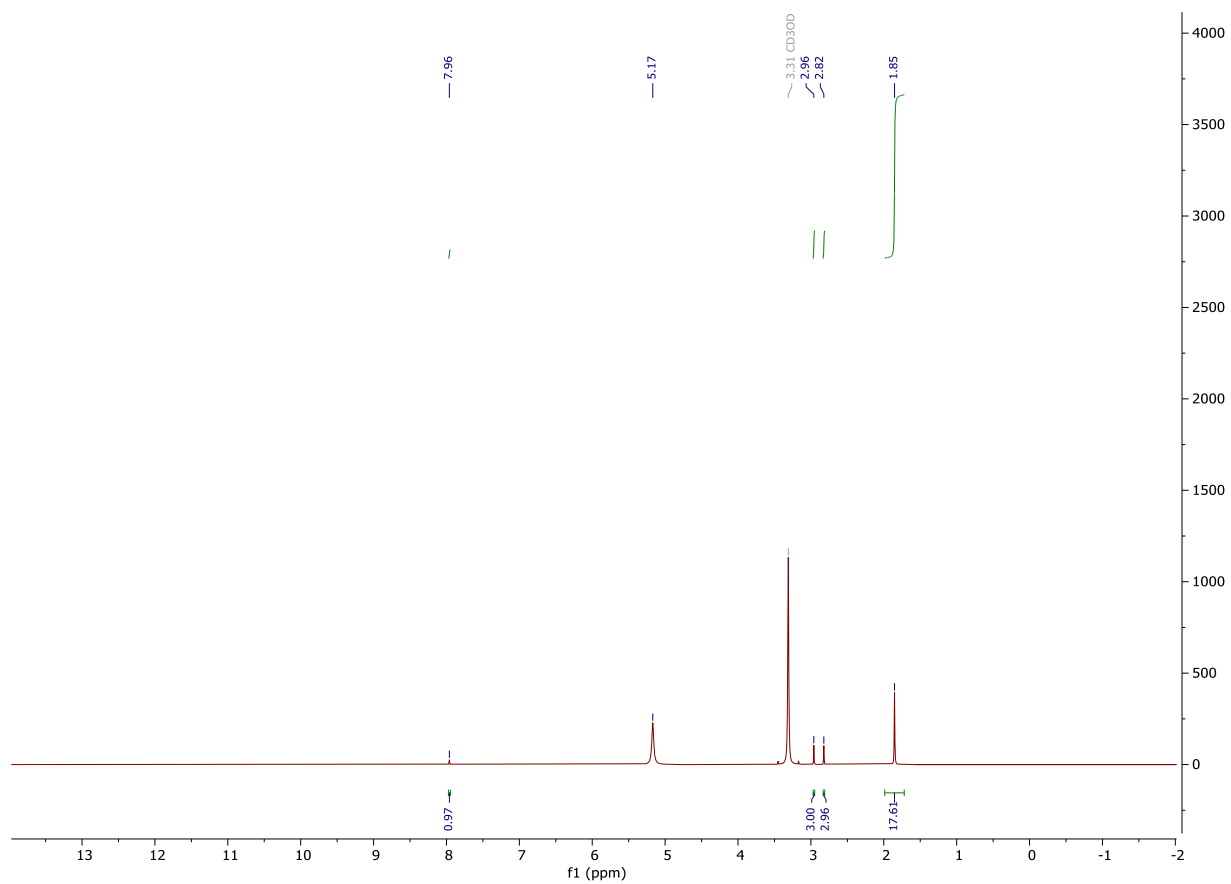

**Figure S56:** Quantitative  $^1\text{H}$  Spectrum of table S9 entry 1 product mixture in  $\text{CD}_3\text{OD}$ .



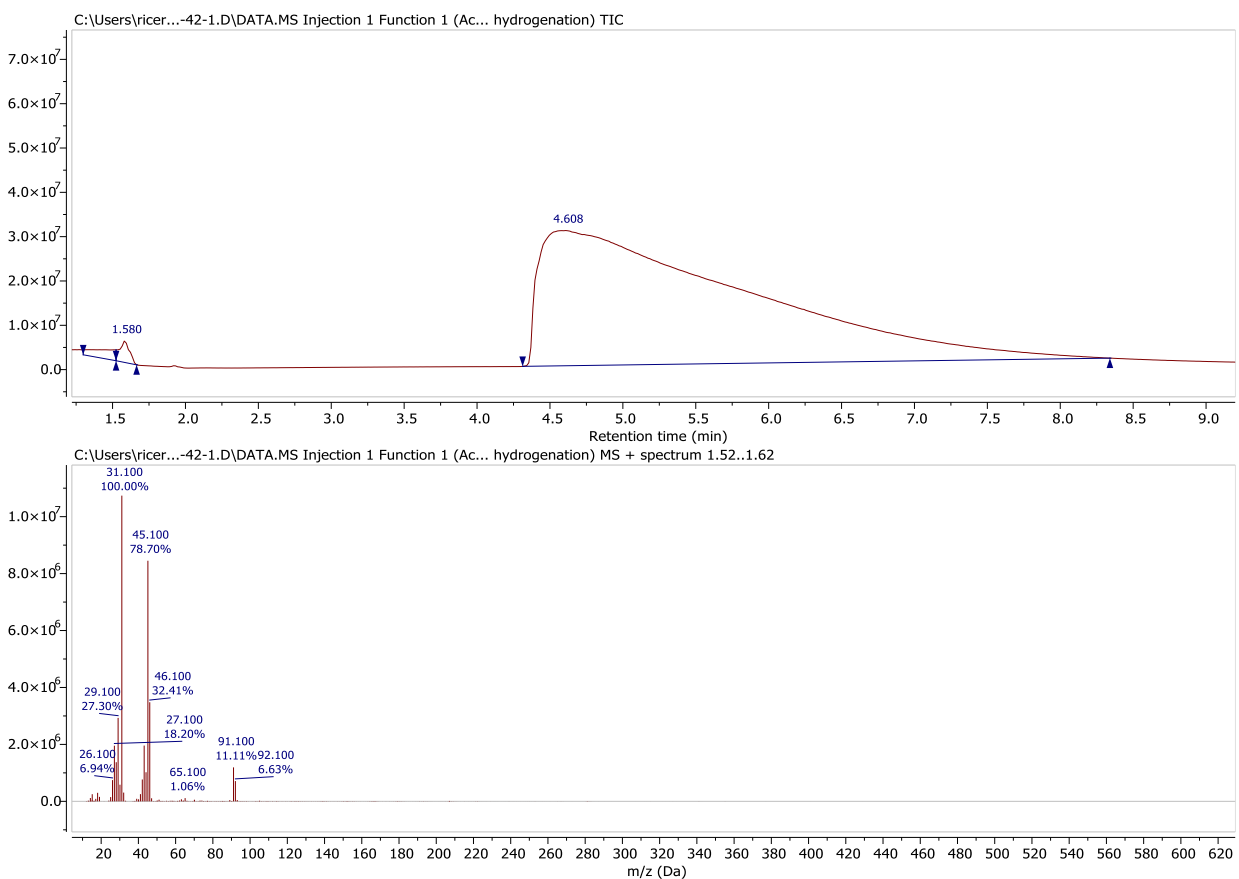

**Figure S57:** Gas chromatography trace and mass spectrum from GCMS on table S9 entry 1 headspace after reaction. These data suggest some ethanol and some methyl cyclohexane. pH was not strongly alkaline suggesting no KOH.

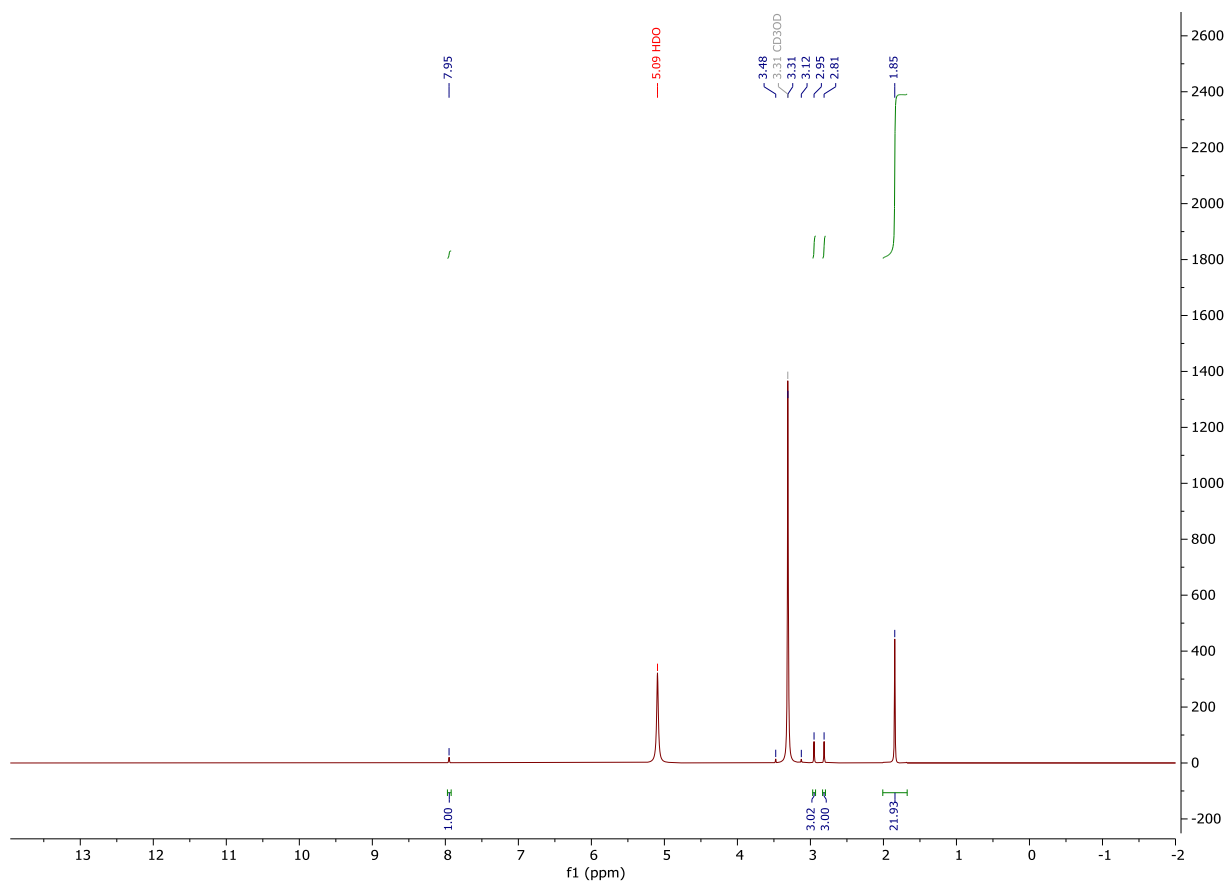

**Figure S58:** Quantitative <sup>1</sup>H Spectrum of table S9 entry 2 reaction mixture in CD<sub>3</sub>OD.

### Kinetics Experiments

Several reactions (Table S7) were done with varying amounts of reagents, solvent, or additives. In a representative procedure, in a nitrogen filled glovebox, potassium hydroxide (0.50 equiv = 0.64 g, 9.8 mmol), catalyst (**1**, 0.10 mol %, 19  $\mu$ mol, with respect to ethanol unless otherwise noted), toluene (10 mL, distilled from benzophenone ketyl), and ethanol (200 proof, 1.0 equiv = 0.92 g, 20 mmol) were added to a 25 mL round bottom flask. Each reaction flask was added a reflux condenser outfitted with a septum and each reaction was refluxed at 120 °C (unless otherwise noted) with reaction progress monitored by water eudiometry. After gas production stopped, volatiles removed using a rotary evaporator under reduced pressure. Quantitative NMR samples were prepared by adding methanol- $d_4$  (700  $\mu$ L) and dimethylformamide (DMF, 0.100 g, 1.37 mmol) and subsequently analyzed by  $^1\text{H}$  NMR. After NMR analysis, volatiles were again removed using a rotary evaporator under reduced pressure and the resulting solid was diluted in 50 mL of deionized water and titrated to determine the molar percentage of acetate in the sample.

Table S10: Reaction Conditions for Kinetics Studies

| Entry          | Cat.      | EtOH (eq) | KOH (eq) | Solvent (mL) | Reaction Time (hr) |
|----------------|-----------|-----------|----------|--------------|--------------------|
| 1              | <b>1</b>  | 1         | 0.5      | 10           | 42.8               |
| 2              | <b>3</b>  | 1         | 0.5      | 10           | 19.25              |
| 3              | <b>2</b>  | 1         | 0.5      | 10           | 19.25              |
| 4              | <b>4</b>  | 1         | 0.5      | 10           | 42.8               |
| 5              | <b>10</b> | 1         | 0.5      | 10           | 2.5                |
| 6 <sup>a</sup> | <b>10</b> | 1         | 0.17     | Neat         | 93.9               |
| 7              | <b>13</b> | 1         | 0.5      | 10           | 57.55              |
| 8              | <b>18</b> | 1         | 1        | 10           | 44.1               |
| 9              | <b>19</b> | 1         | 1        | 10           | 45.1               |
| 10             | <b>20</b> | 1         | 1        | 10           | 56.2               |
| 11             | <b>21</b> | 1         | 1        | 10           | 46                 |
| 12             | <b>22</b> | 1         | 1        | 10           | 46                 |
| 13             | <b>23</b> | 1         | 1        | 10           | 57.92              |

<sup>a</sup> Catalyst loading based on moles of KOH; run at 80 °C.

### Kinetics Graphs

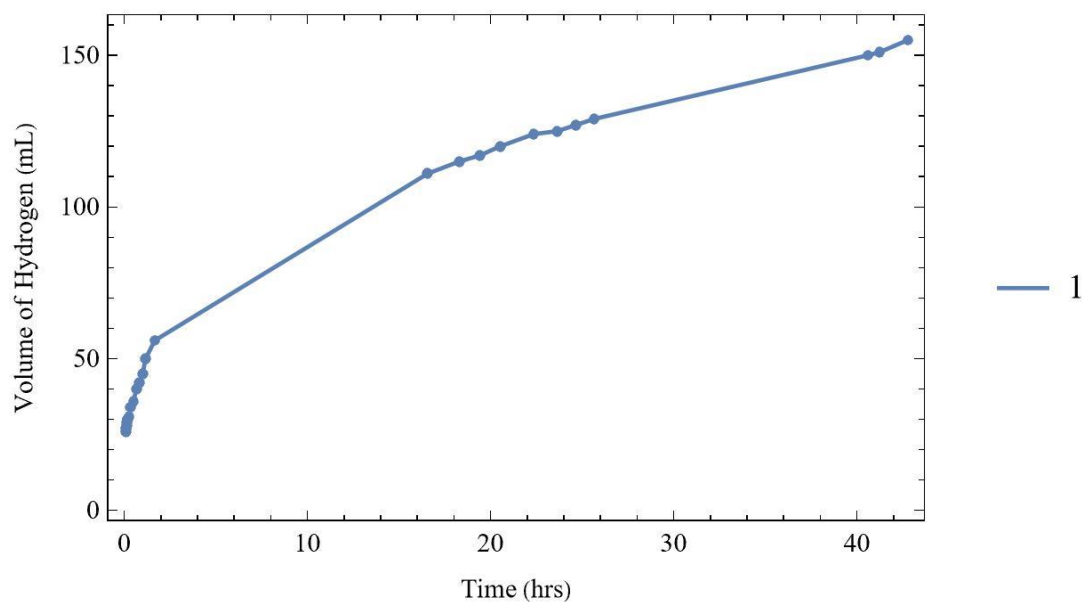

Figure S59: Kinetics for **1** (entry 1)

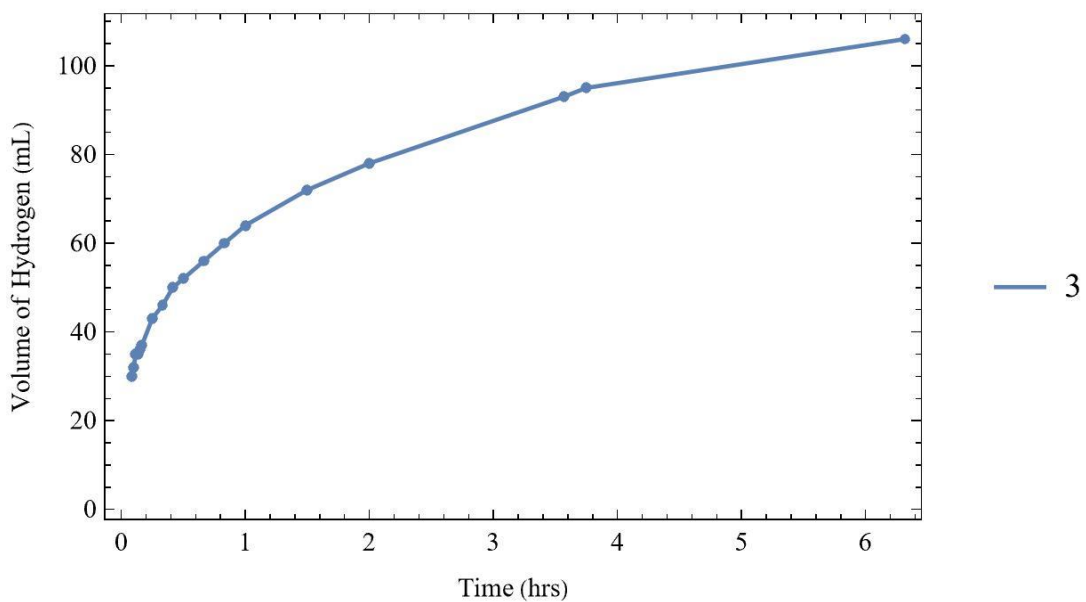

Figure S60: Kinetics for 3 (entry 2)

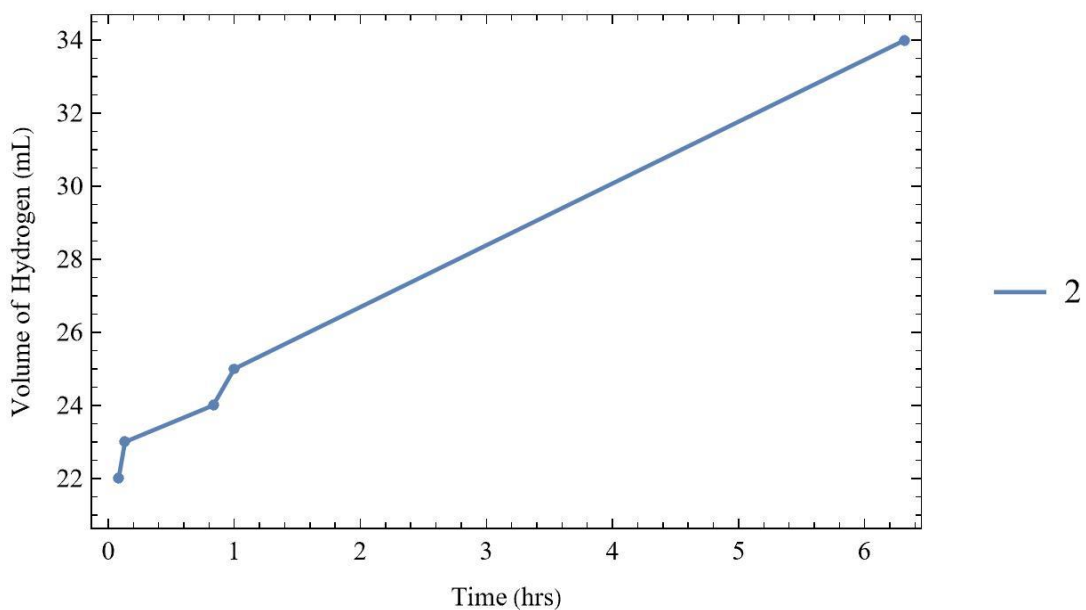

Figure S61: Kinetics for 2 (entry 4)

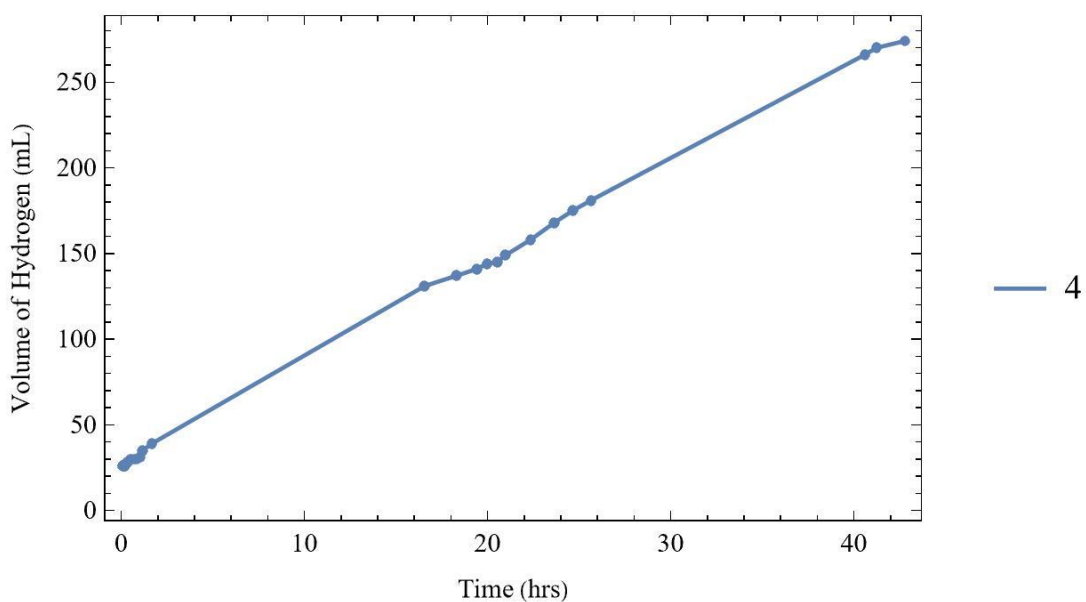

Figure S62: Kinetics for 4 (entry 4)

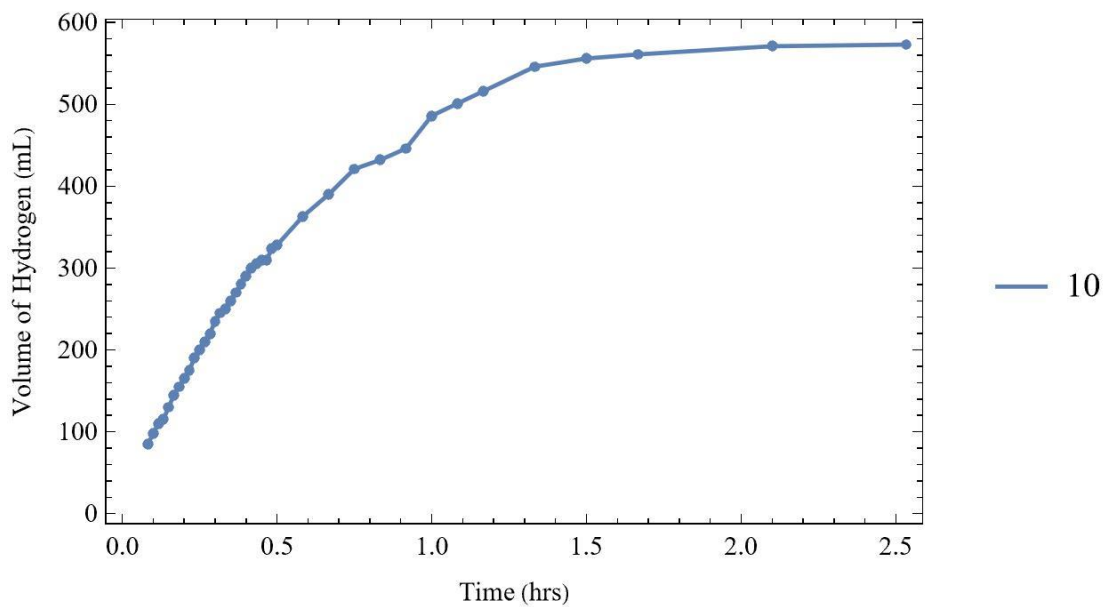

Figure S63: Kinetics for **10** (entry 5) TOF =  $1.34 \text{ s}^{-1}$

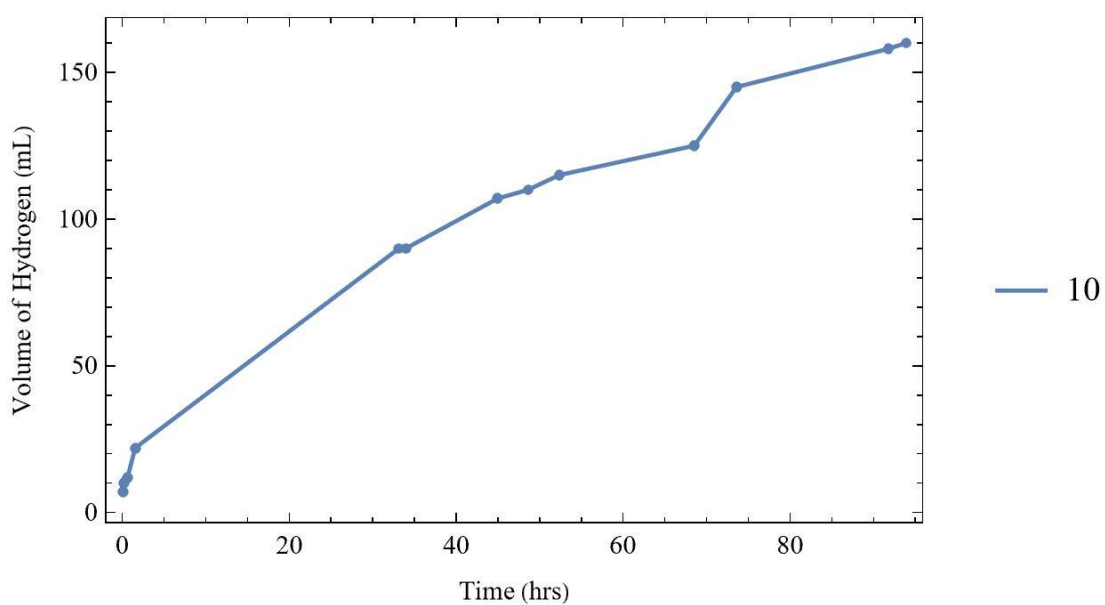

Figure S64: Kinetics for **10** (entry 6)

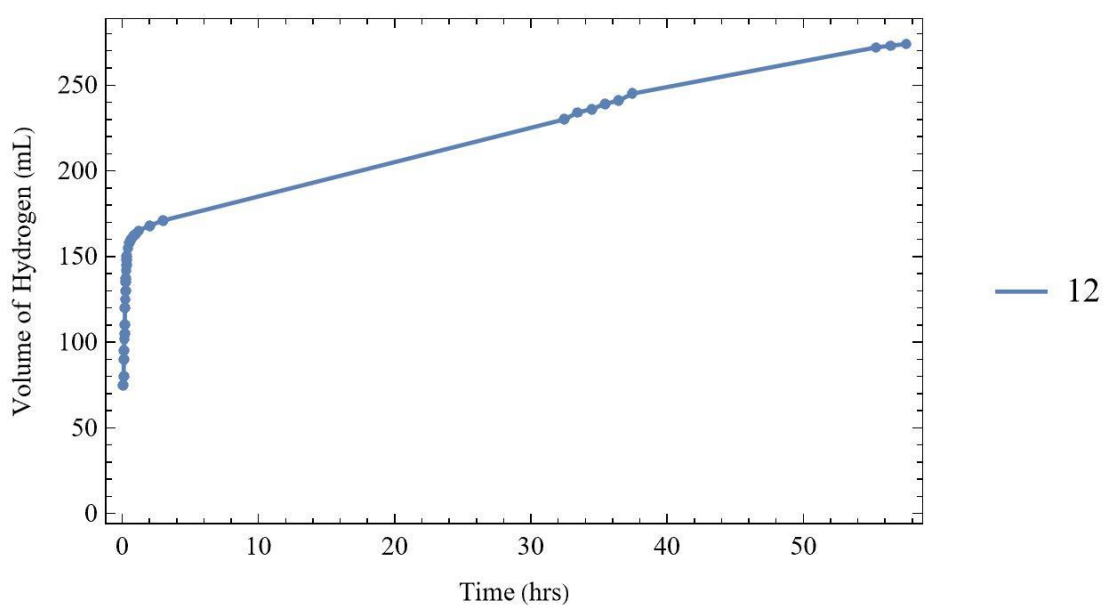

Figure S65: Kinetics for **12** (entry 7)

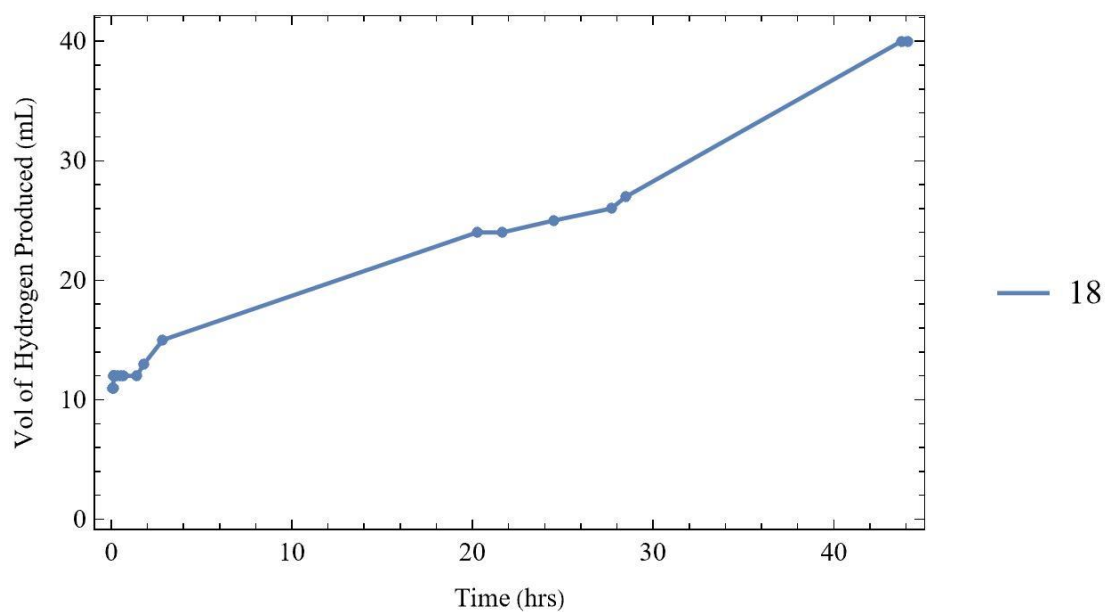

Figure S66: Kinetics for **18** (entry 8). TOF =  $5.32 \times 10^{-3} \text{ s}^{-1}$

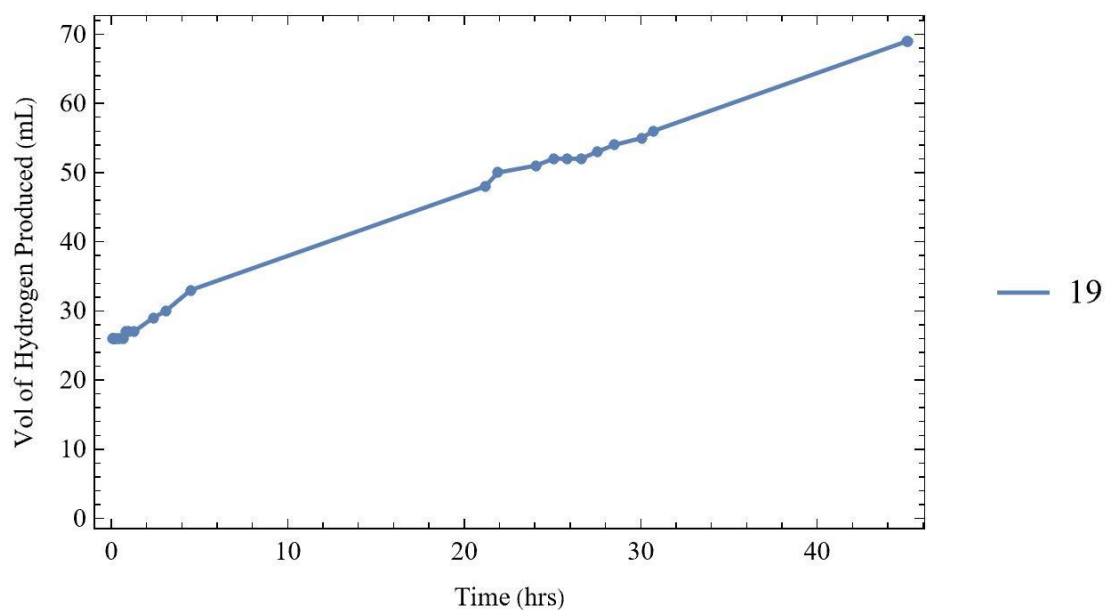

Figure S67: Kinetics for **19** (entry 9). TOF =  $2.55 \times 10^{-2} \text{ s}^{-1}$

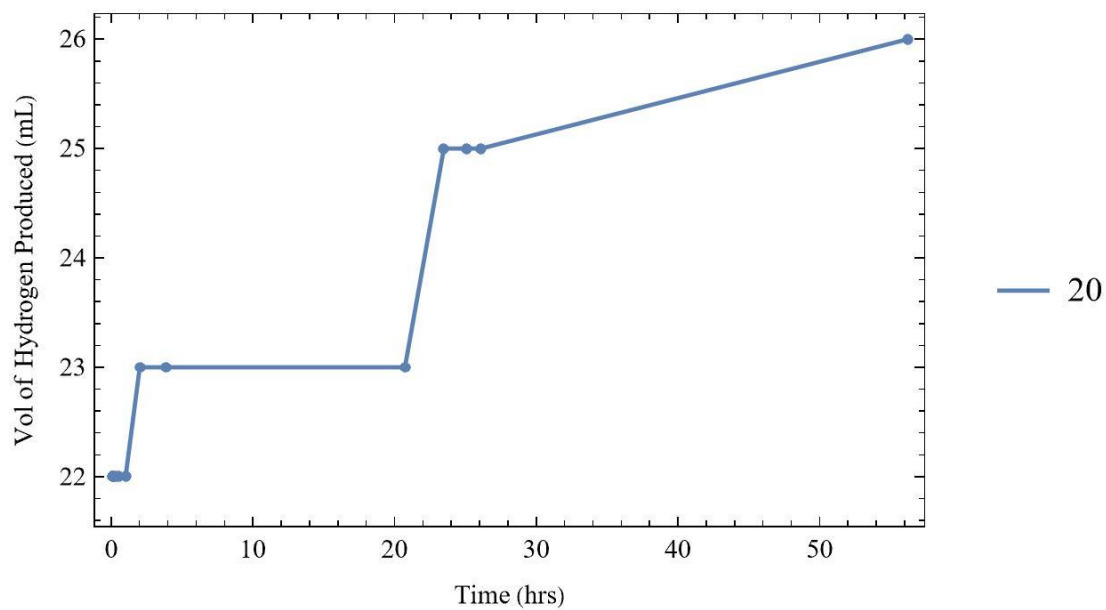

Figure S68: Kinetics for **20** (entry 10). TOF =  $5 \times 10^{-3} \text{ s}^{-1}$

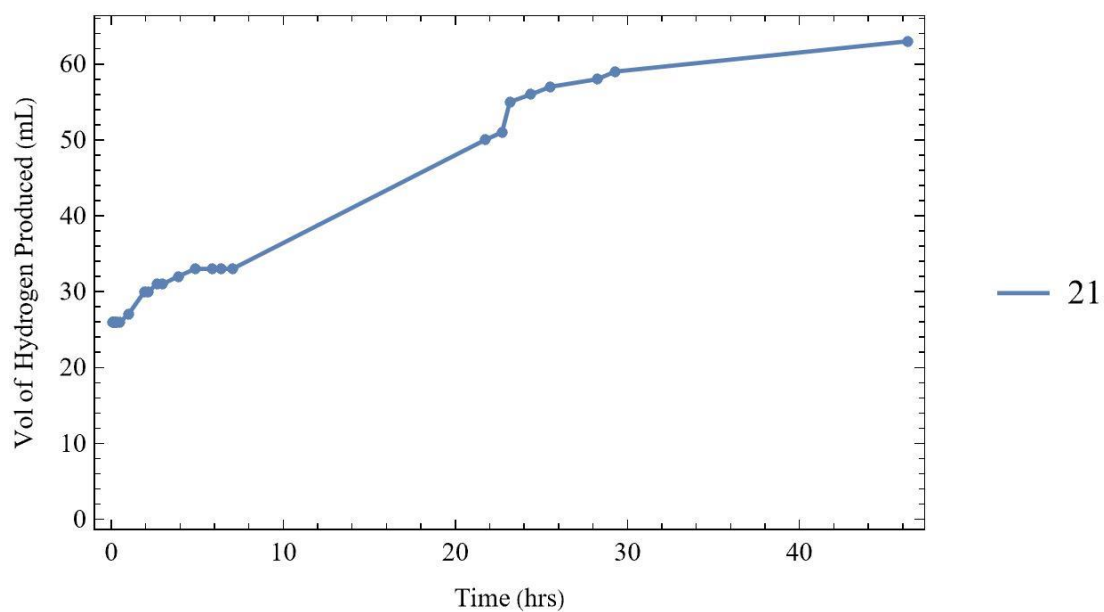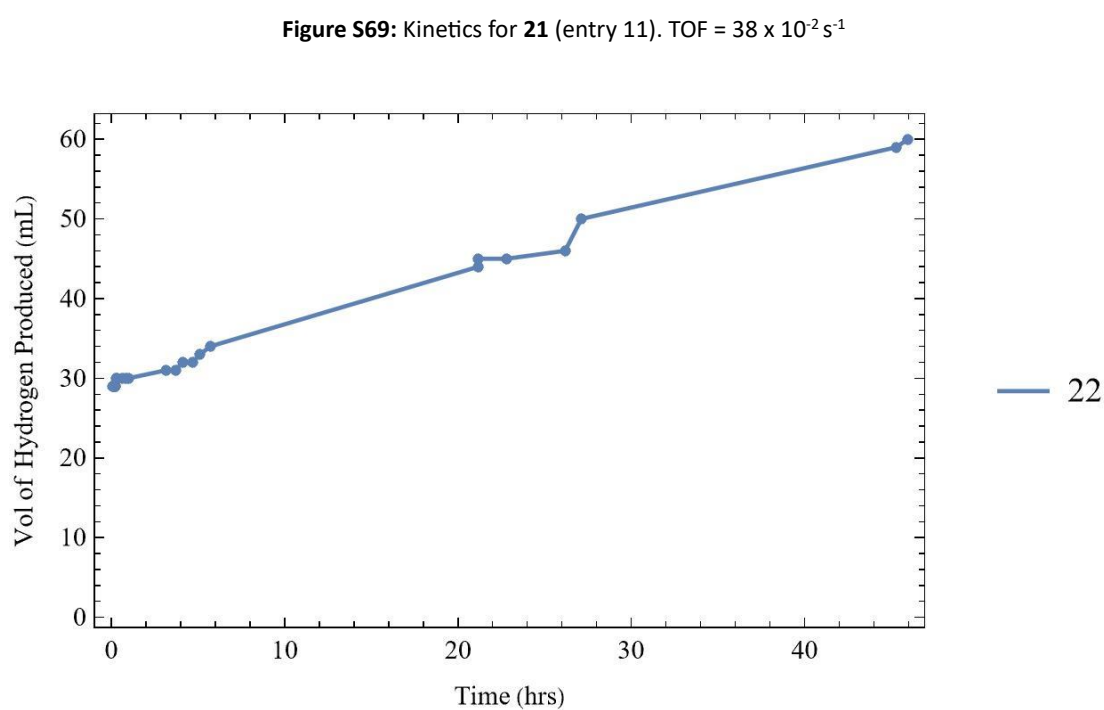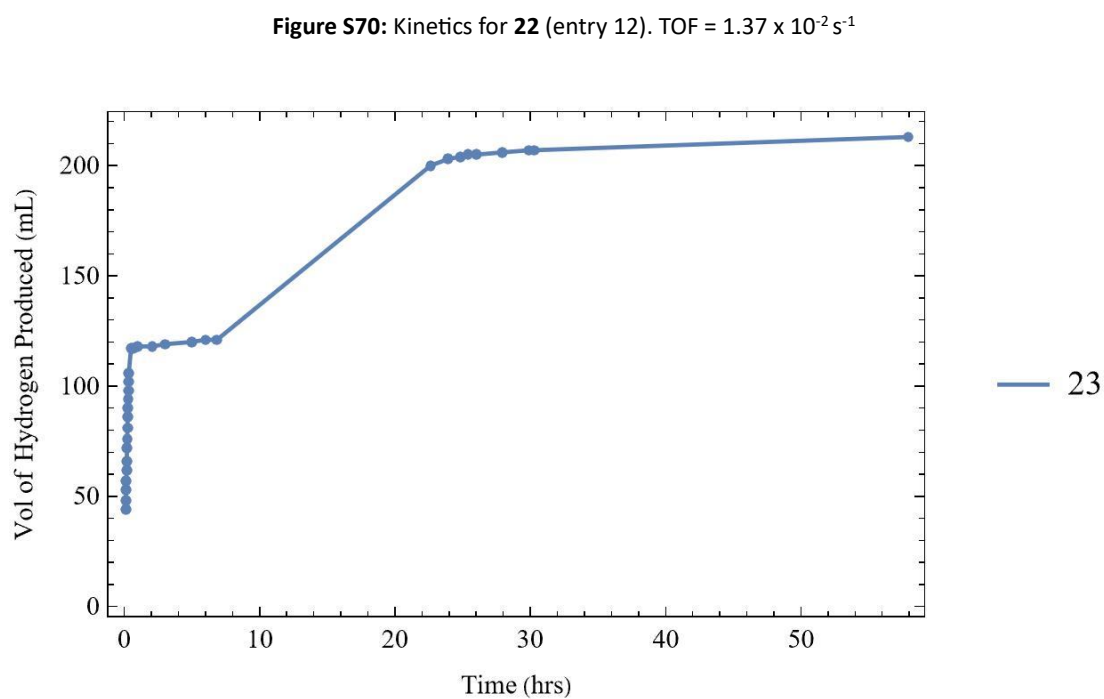

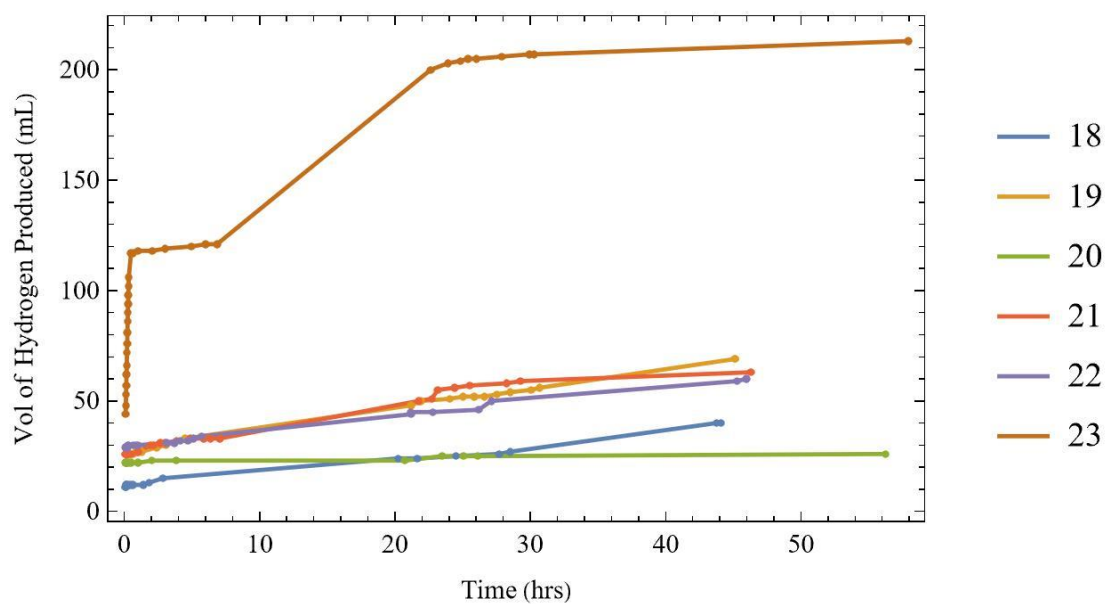

Figure S72: Kinetics for 18-23

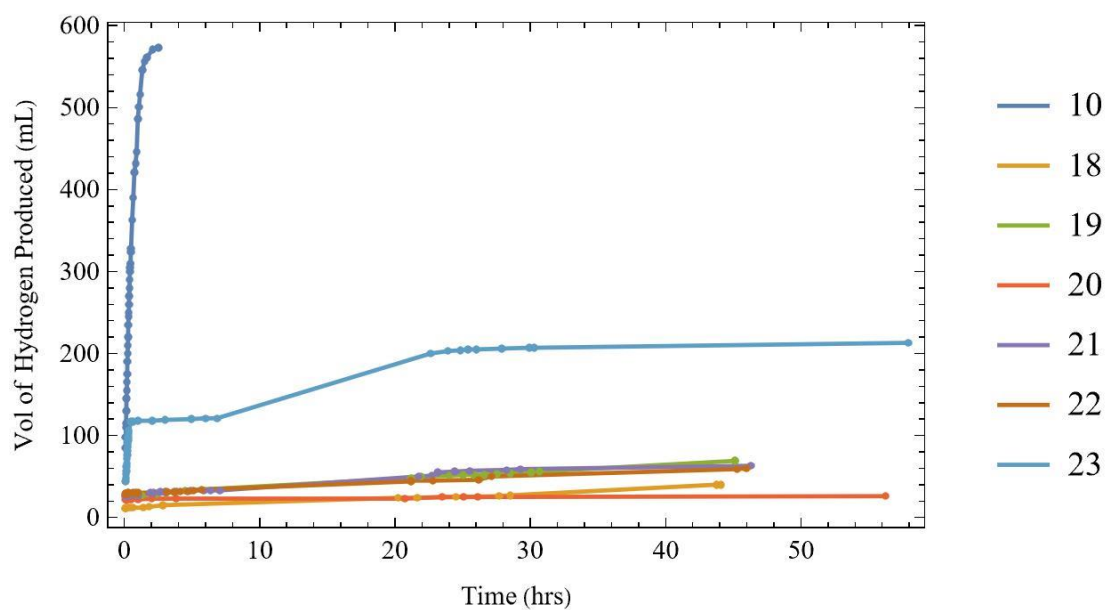

Figure S73: Kinetics for 10 and 18-23

### RuMACHO-BH Mechanistic Study

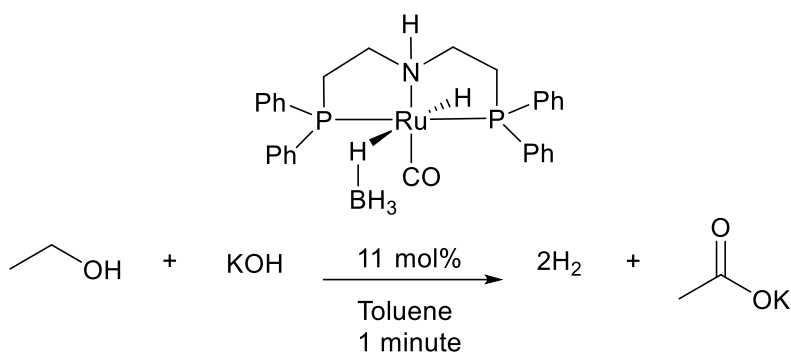

In a nitrogen filled glovebox, potassium hydroxide (0.146 g, 2.24 mmol), **10** (30 mg, 51  $\mu$ mol), and ethanol (200 proof, 0.21 g, 4.5 mmol) were combined with toluene (5 mL, distilled from benzophenone ketyl) in a Schlenk flask. The flask was sealed with a septum and brought out of the glovebox where it was attached to a water eudiometer. The flask was then lowered into an oil bath at 120 °C for 1 minute during which the color changed from milky white to bright, clear yellow. After 1 minute, the reaction dried under reduced pressure giving an orange solid. The flask was returned to the glovebox where toluene-*d*<sub>8</sub> (1.5 mL) was added directly to the flask. This was filtered and an NMR was taken. After the NMR, the solution was diluted with benzene, filtered, and evaporated to dryness.

The above procedure was repeated, and the orange solid residue was dissolved in a minimal volume of benzene (Millipore Sigma, dried on a JC Meyer solvent purification system) To this was slowly added hexanes (VWR, dried on a JC Meyer solvent purification system) which induced the formation of crystalline solids that were assigned as **10b** & **10c**.



### Mechanistic Study Spectra

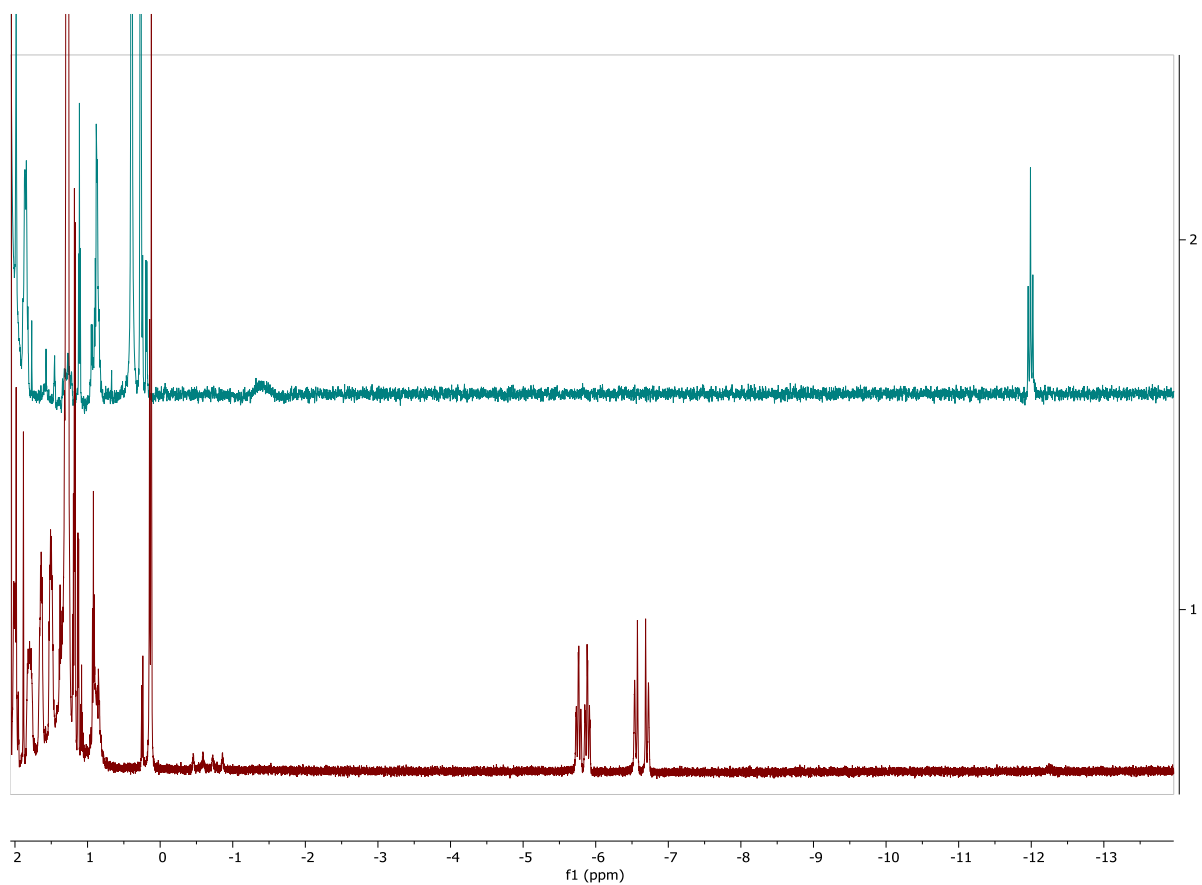

**Figure S74:** <sup>1</sup>H spectra of **10** (top) and the reaction mixture after 1 minute at 120 °C (Bottom) in toluene-*d*<sub>8</sub>.

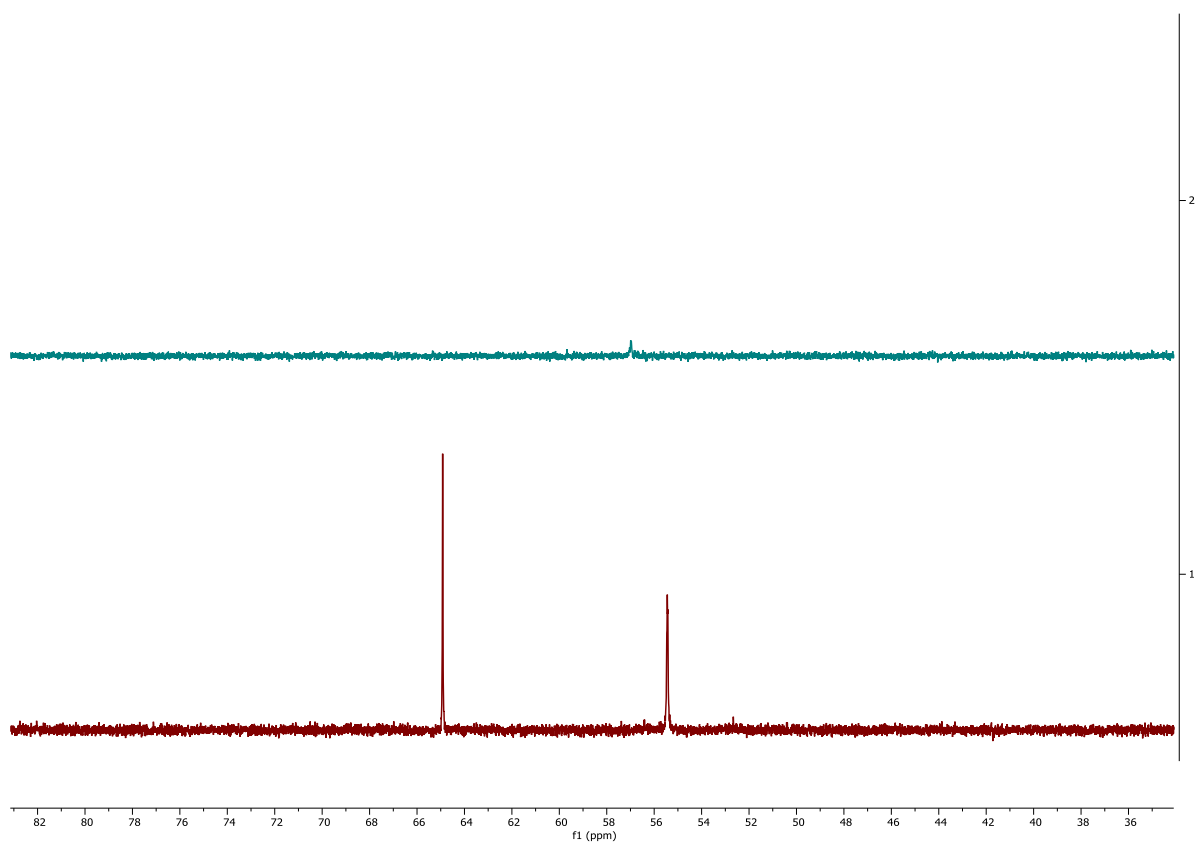

**Figure S75:** <sup>31</sup>P spectra of **10** (top) and the reaction mixture after 1 minute at 120 °C (Bottom) in toluene-*d*<sub>8</sub>.

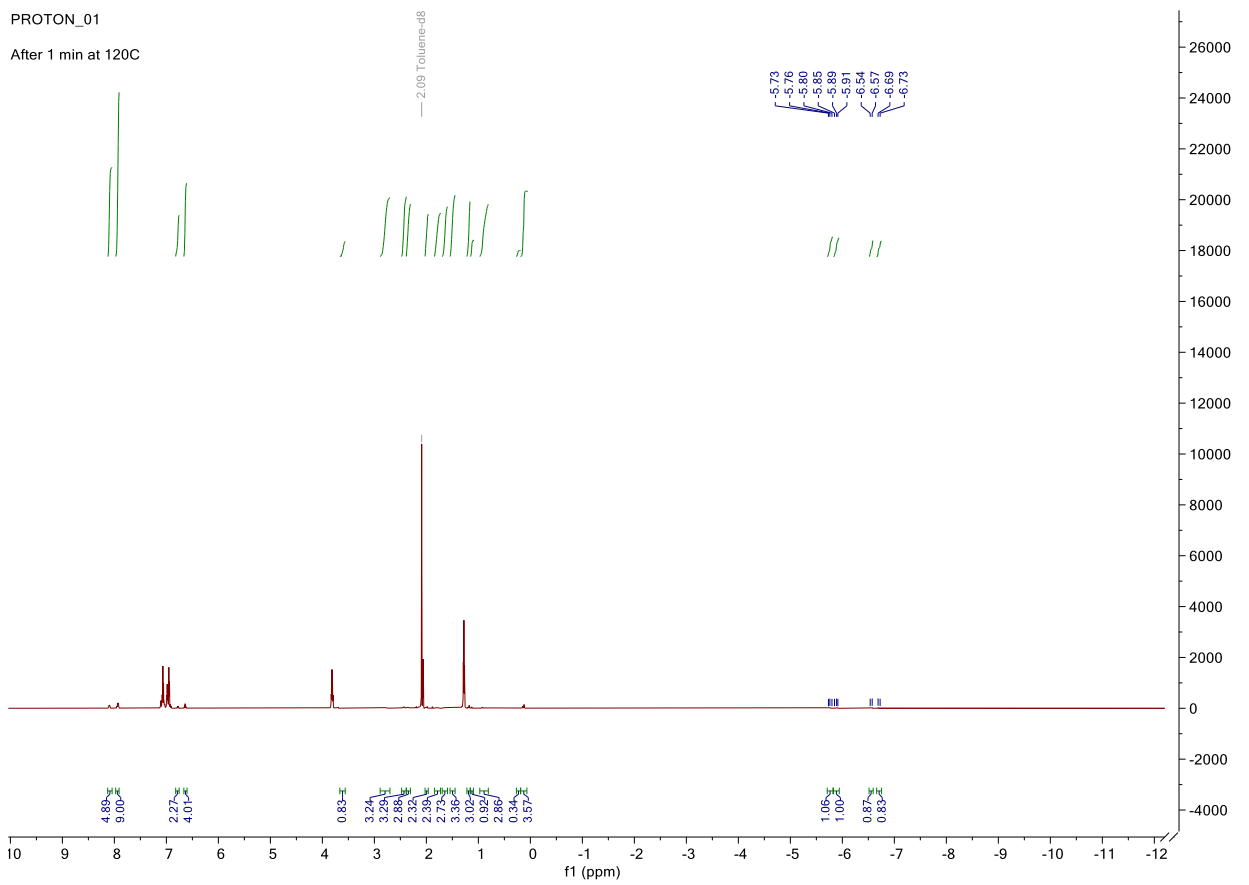

Figure S76: Full  $^1\text{H}$  spectra of reaction mixture after 1 minute at 120 °C in toluene- $d_8$ .

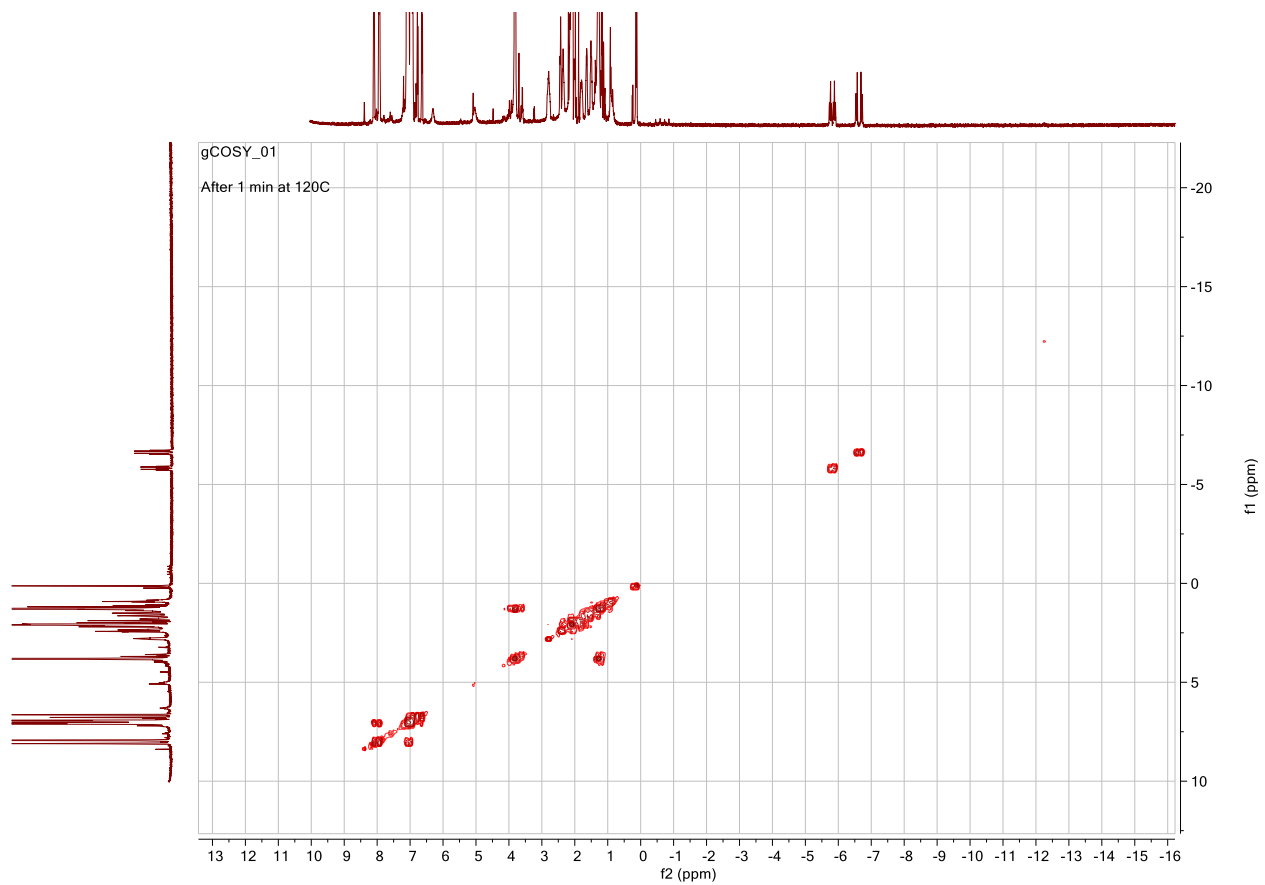

Figure S77:  $^1\text{H}$ - $^1\text{H}$  COSY spectra of reaction mixture after 1 minute at 120 °C in toluene- $d_8$ .

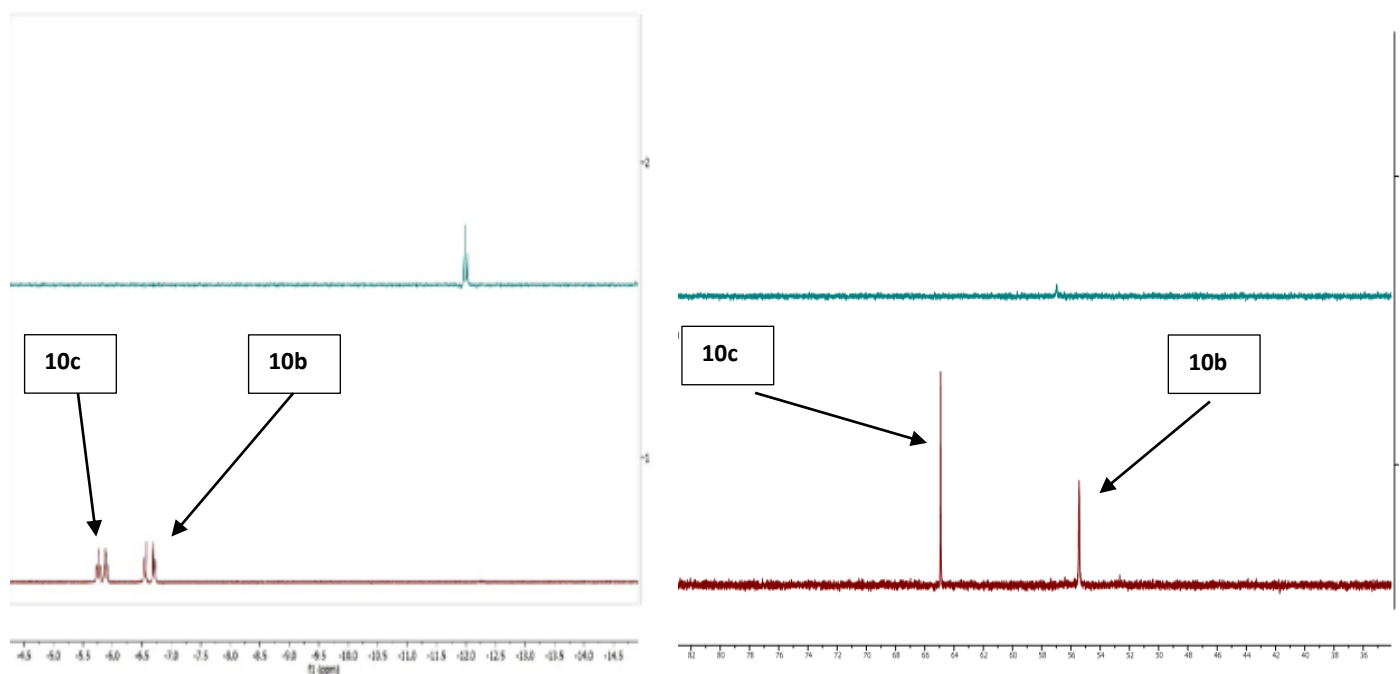

**Figure S78:** Left: RuMACHO-BH (top) before the reaction and (bottom) the isomers formed after initiation and removal of ethanol. Right:  $^{31}\text{P}$  spectrum of RuMACHO-BH (top) and isomers (bottom). **10b** (*fac* isomer,  $^1\text{H}$  -6.62 ppm,  $^{31}\text{P}$  55.39), **10c** (*mer* isomer,  $^1\text{H}$  -5.87 ppm,  $^{31}\text{P}$  64.72).

### Isomers **10c** and **10b**

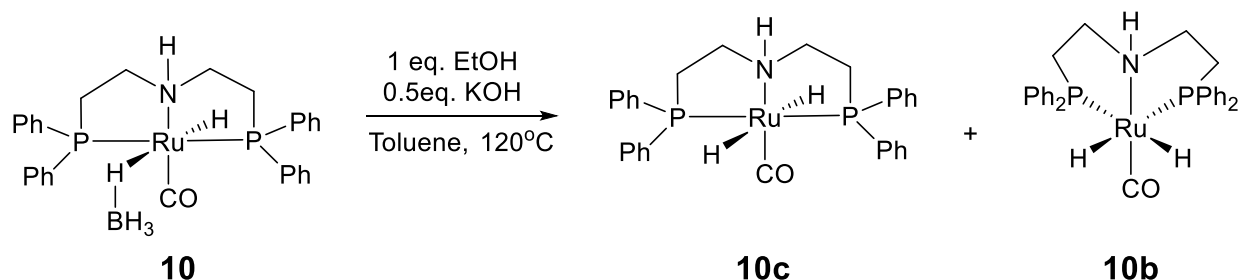

In a nitrogen filled glovebox, **10** (103 mg, 175  $\mu\text{mol}$ ) was combined with ethanol (0.157 g, 0.200 mL, 3.41 mmol) and potassium hydroxide (0.1 g, 1.54 mmol) in a round bottom flask with toluene (2 mL, distilled from benzophenone ketyl). This was attached to a condenser capped with a septum outside of the glovebox under inert conditions. The round bottom was lowered into an oil bath at 120  $^{\circ}\text{C}$ . After 7 minutes, the  $\text{H}_2$  evolution stopped, and the round bottom was returned to the glovebox where the solid was diluted with benzene, filtered, and evaporated to dryness. This filtration procedure was repeated once more, then residual solids were recrystallized by slow addition of hexanes to a minimal volume of benzene giving **10b** & **10c**. Recrystallization gave 70.6 mg of the isomers (89 % yield).

m. p. 148.7-151.1  $^{\circ}\text{C}$  (decomposition).

$^1\text{H}$  NMR (500 MHz,  $\text{C}_6\text{D}_6$ )  $\delta$  8.21 (q,  $J = 6.3$  Hz, 3H), 7.99 (at,  $J = 9.2, 8.5$  Hz, 4H), 7.95 – 7.88 (m, 3H), 7.15 – 7.04 (m, 9H), 7.03 – 6.89 (m, 11H), 6.81 (at,  $J = 7.4$  Hz, 2H), 6.67 (at,  $J = 7.1, 6.6$  Hz, 4H), 6.54 (at,  $J = 11.28, 10.09$  Hz, 1H), 3.23 – 3.08 (m, 2H), 2.81 (at,  $J = 15.6, 13.2$  Hz, 2H), 2.49 (ad,  $J = 14.6$  Hz, 2H), 2.36 – 2.12 (m, 4H), 1.95 – 1.80 (m, 2H), 1.61 (dtd,  $J = 23.4, 15.4, 9.2$  Hz, 4H), -5.87 (dt,  $J = 117.40, 19.81, 19.45$  Hz, 2H), -6.62 (dd,  $J = 88.1, 23.68$  Hz, 2H).

$^{13}\text{C}$  NMR (500 MHz,  $\text{C}_6\text{D}_6$ )  $\delta$  133.58 (4C), 133.06 (4C), 132.76 (4C), 130.50 (6C), 128.78 (12C), 127.96 (10C), 127.77 (4C), 127.57 (2C), 53.13 (4C), 50.33 (2C), 50.24 (2C), 31.57 (2C), 30.40 (2C).

$^{31}\text{P}$  NMR (202 MHz,  $\text{C}_6\text{D}_6$ )  $\delta$  64.72, 55.39.

Elemental Analysis: calc'd: C 60.83%, H 5.46%, N 2.45%; found: C 60.83%, H 5.435%, N 2.355%.

IR (KBr,  $\text{cm}^{-1}$ ): 3051, 1894, 1572, 1433, 1097, 831, 694, 601, 505.

MALDI MS for  $\text{C}_{29}\text{H}_{31}\text{P}_2\text{Ru}$ : calc'd 573.09 g/mol; found  $m/z = 570.28$   $[\text{M}-3\text{H}]^+$ , 1114.69 g/mol.

### Spectra of Complexes **10b** and **10c**

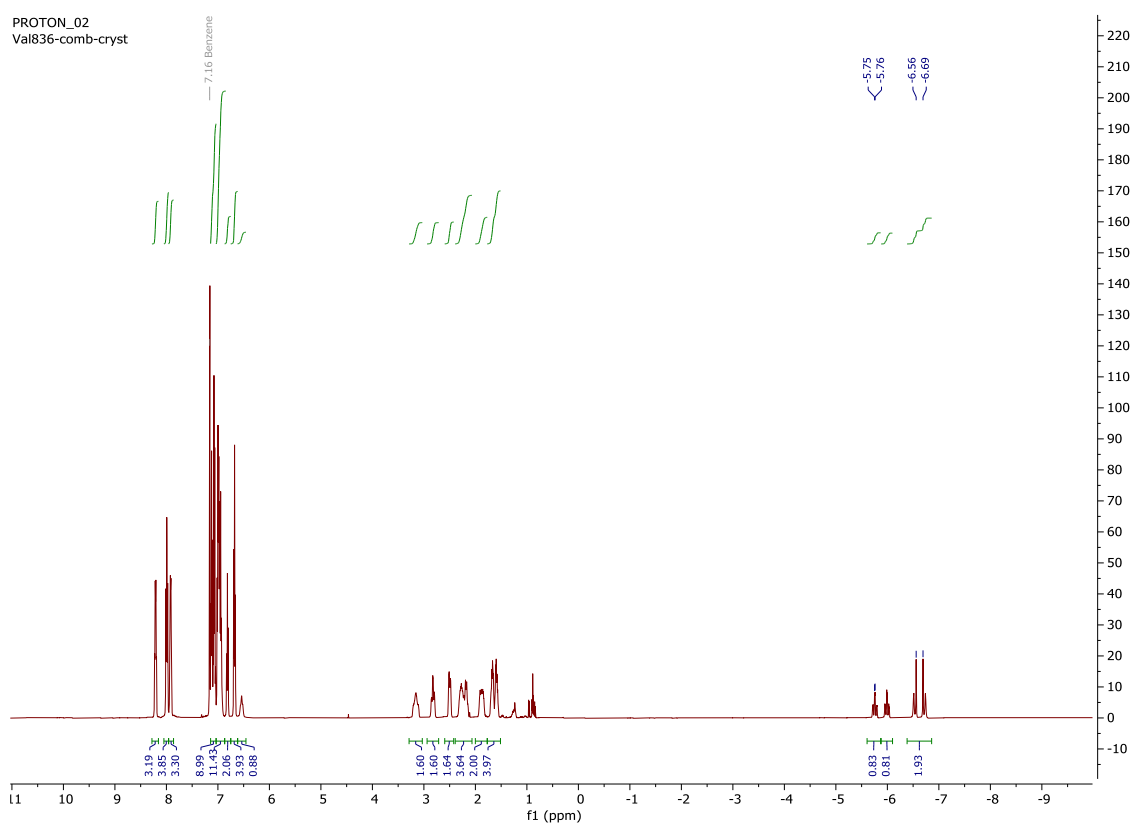

Figure S79: Full  $^1\text{H}$  spectrum of complexes **10b** & **10c** in  $\text{C}_6\text{D}_6$ .

CARBON\_01  
ARR-II-81-Product

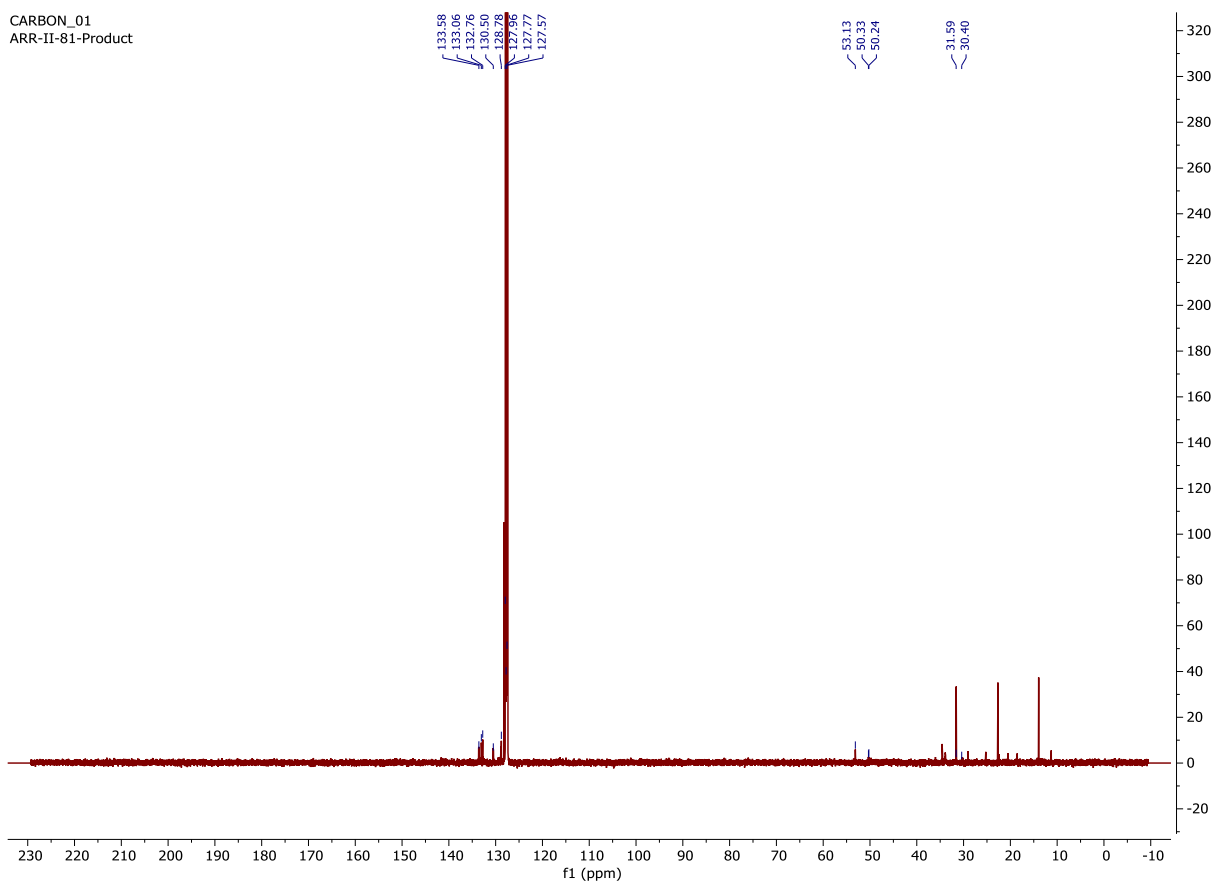

Figure S80: Full  $^{13}\text{C}$  spectrum of complexes **10b** & **10c** in  $\text{C}_6\text{D}_6$ .

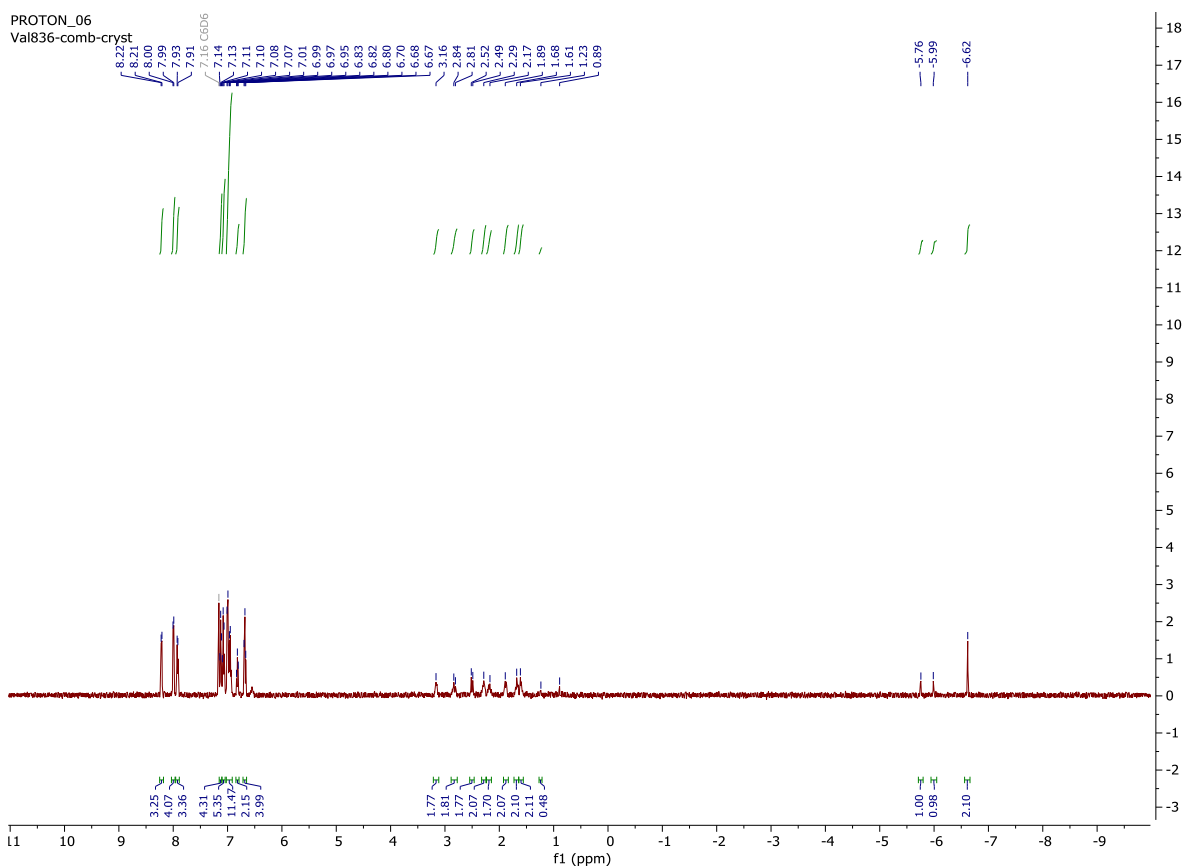

Figure S81: Full  $^1\text{H}\{^{31}\text{P}\}$  spectrum of complexes **10b** & **10c** in  $\text{C}_6\text{D}_6$ .

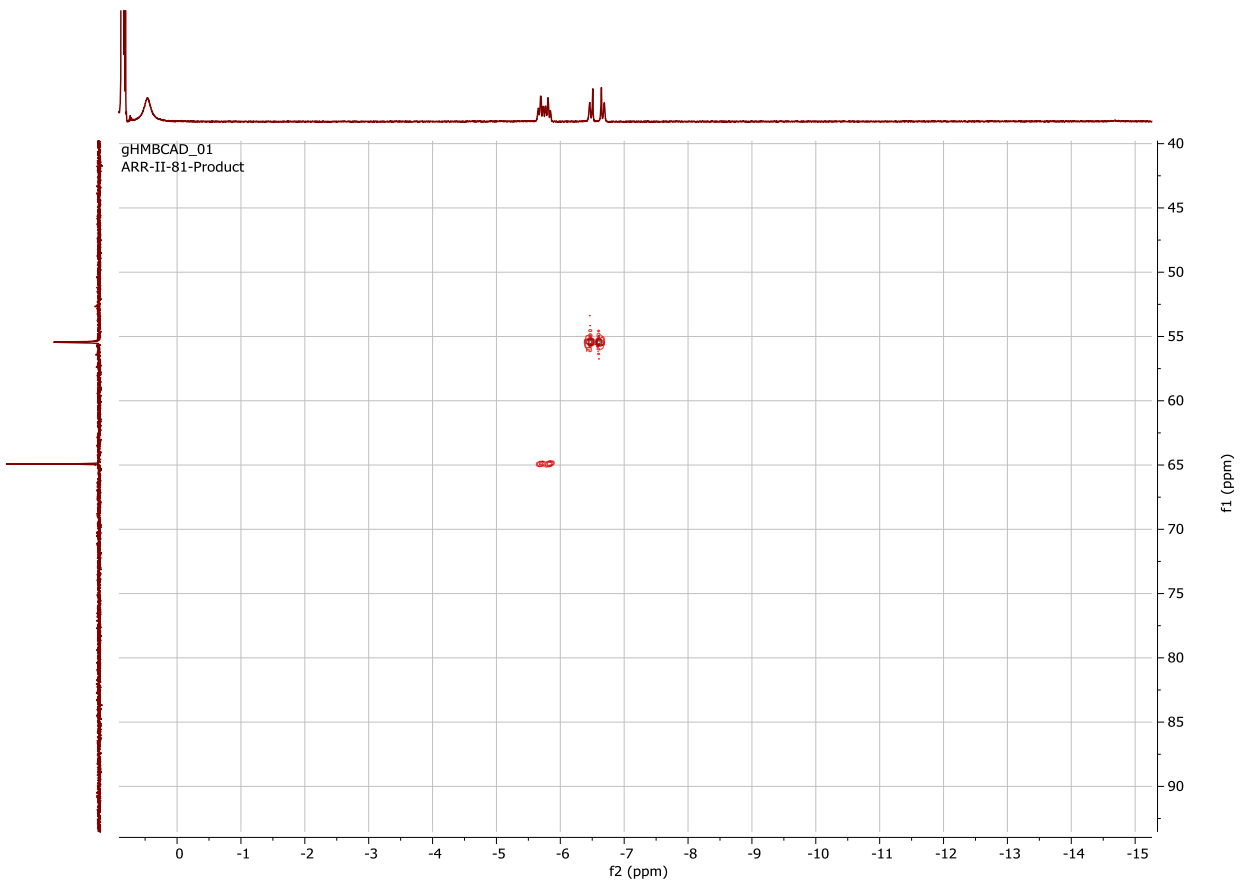

Figure S82:  $^1\text{H}$ - $^{31}\text{P}$  HMBC of **10b** & **10c** demonstrating hydride-phosphorus coupling in  $\text{C}_6\text{D}_6$ .

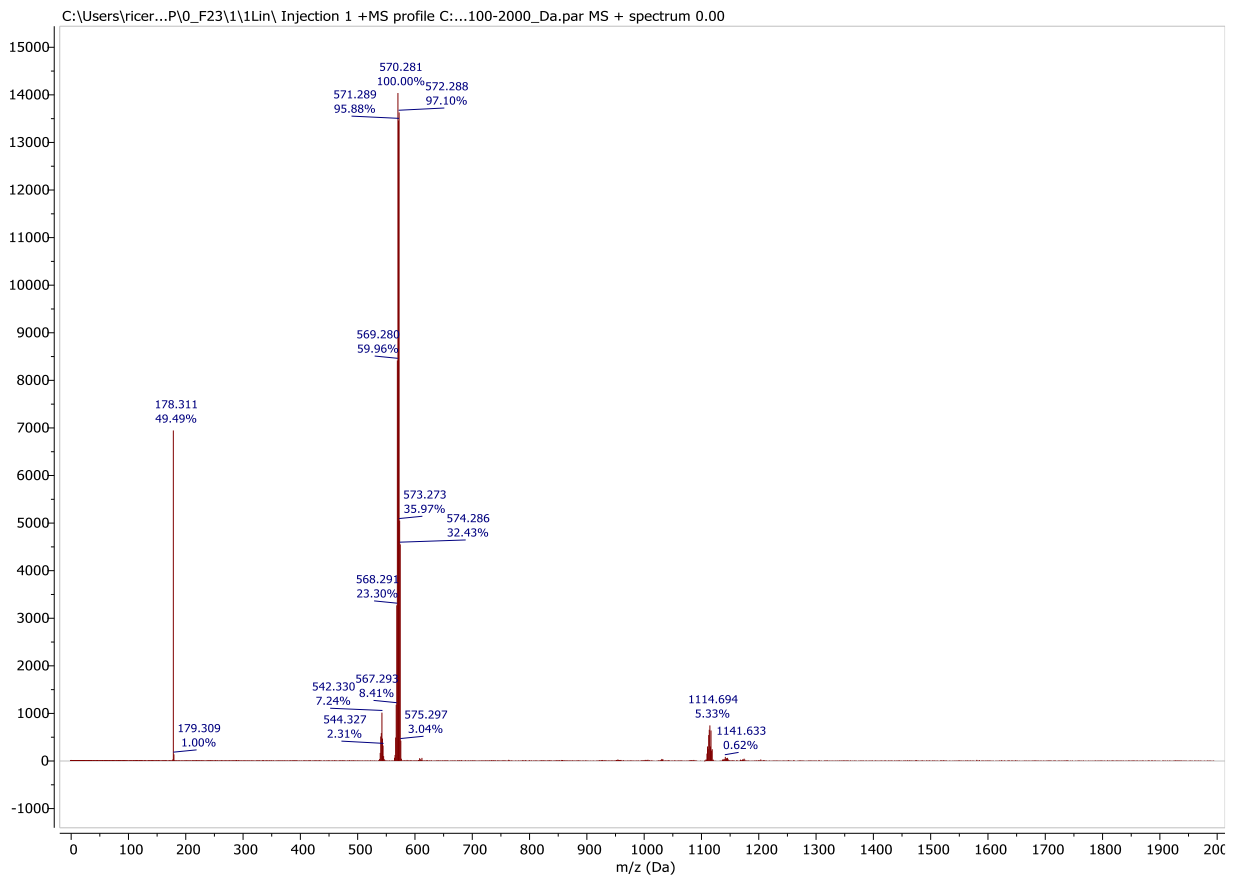

Figure S83: MALDI  $[\text{M}^+]$  spectra of **10b** & **10c**. Anthracene was used as the matrix.

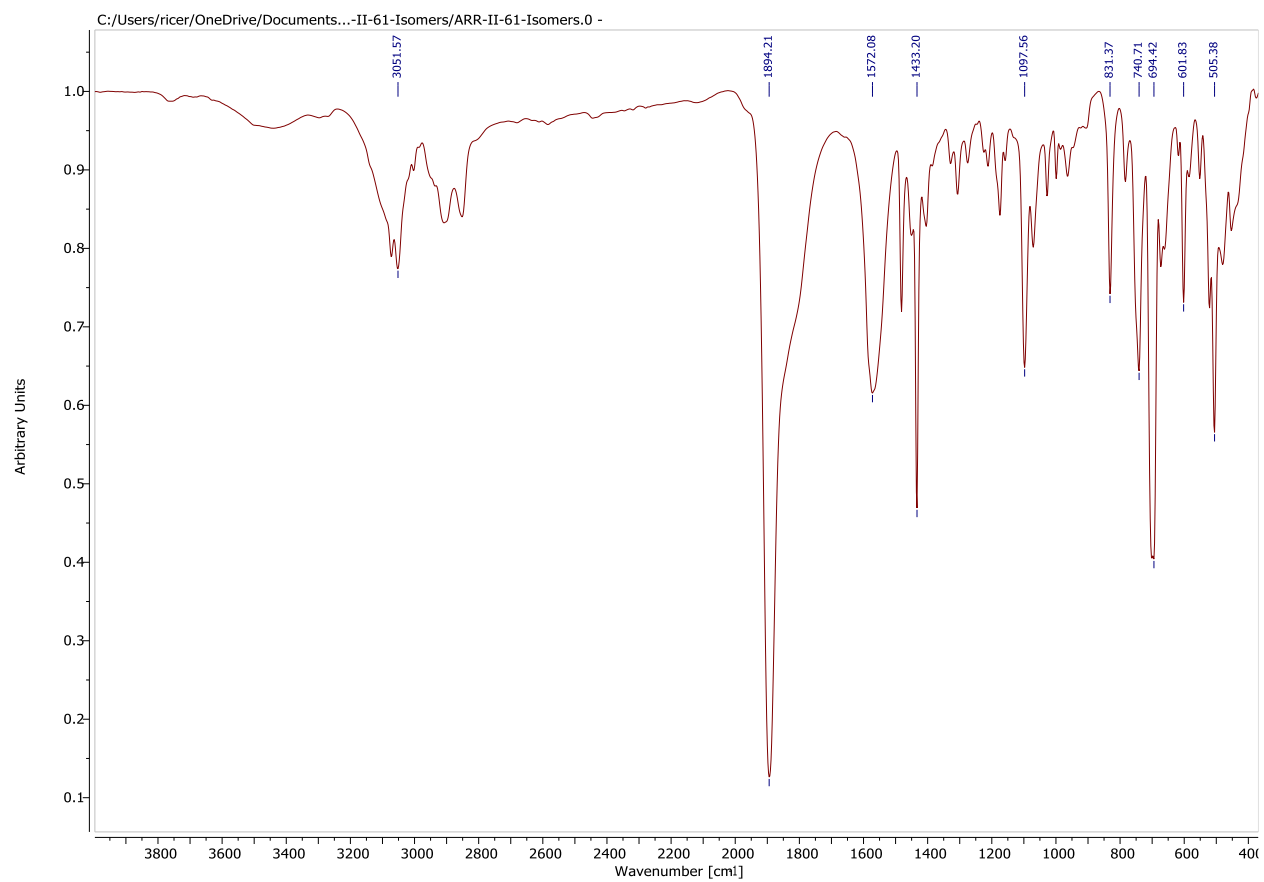

Figure S84: IR spectrum of complexes **10b** & **10c**.

### Kinetic Competence Testing of **10b** and **10c**

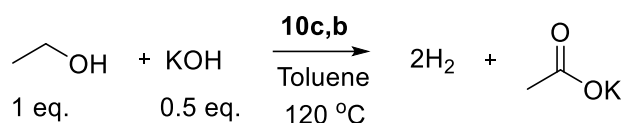

In a nitrogen filled glovebox, potassium hydroxide (0.561 g, 8.80 mmol) was weighed out and added to a 25 mL round bottom flask. Next, a mixture of **10b** and **10c** (0.1 mol % with respect to ethanol, 11.4 mg, 20  $\mu\text{mol}$ ), toluene (10 mL, distilled from benzophenone ketyl), ethanol (200 proof, 0.92 g, 1.2 mL, 20 mmol) were added. Outside the glovebox, the flask was attached to a condenser and immersed in a 120  $^\circ\text{C}$  oil bath for 3 hours. Gas production was measured by water eudiometry, attached through a needle. After 3 hours, volatiles removed from the resulting solution using a rotary evaporator under reduced pressure. Quantitative NMR samples were prepared by adding methanol- $d_4$  (700 mL) and dimethylformamide (DMF, 111 mg, 1.52  $\mu\text{mol}$ ) and subsequently analyzed by  $^1\text{H}$  NMR. After NMR analysis, volatiles were again removed using a rotary evaporator under reduced pressure and the resulting solid was diluted in water (50 mL, deionized) and titrated with dilute hydrochloric acid (0.3454 M) and sodium hydroxide (0.3407 M) solutions. This gave 80% acetate by NMR and 98% carboxylates by titration.

### Rate During Reaction Using **10b** and **10c**

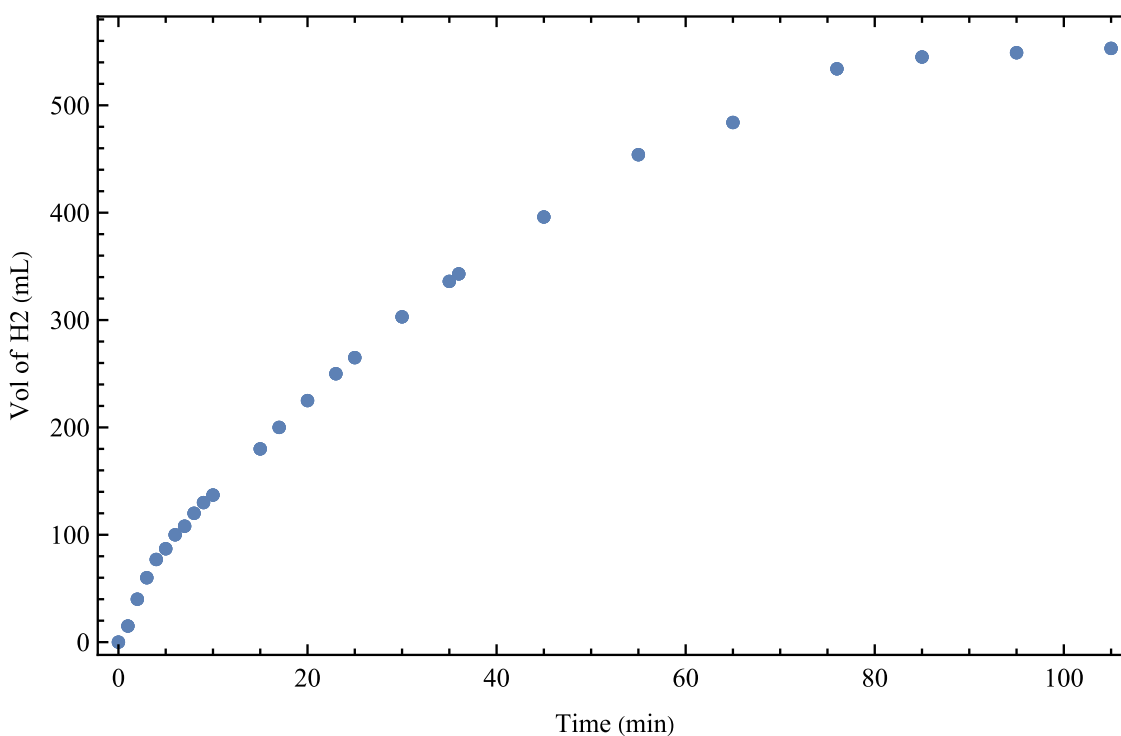

**Figure S85:** H<sub>2</sub> production from a reaction involving catalysts **10b** and **10c** over 3 hours.



Kinetic Competence of 10b and 10c NMR Spectrum

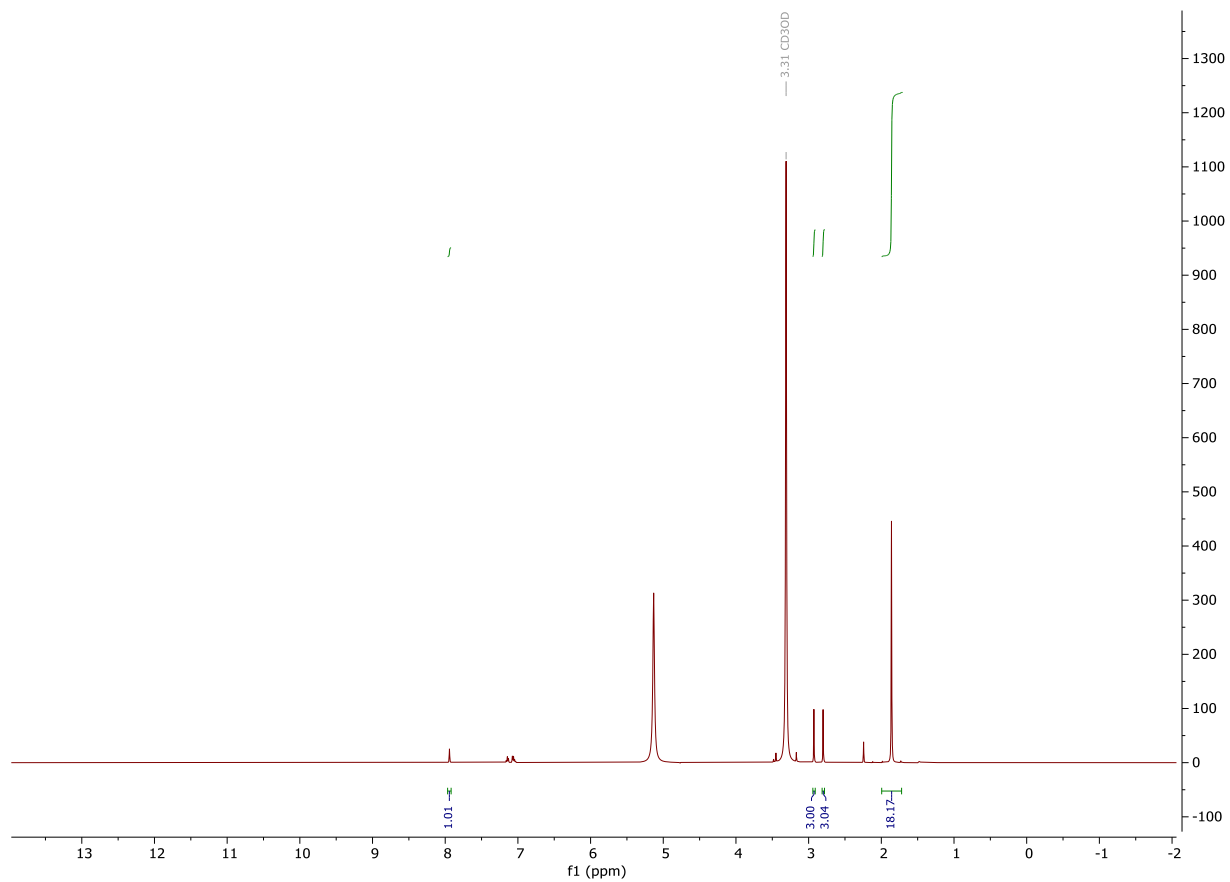

Figure S86: <sup>1</sup>H Spectrum of product mixture in CD<sub>3</sub>OD.

### Chlorination of Isomers

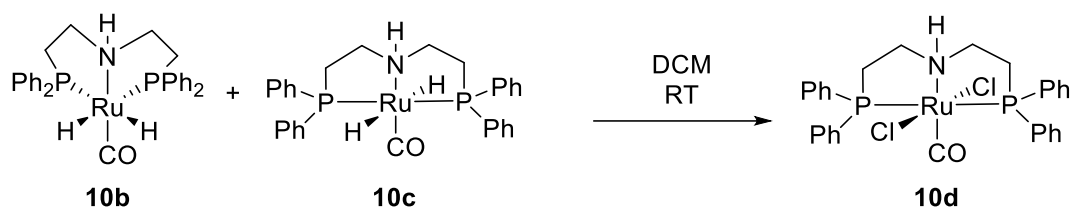

In a nitrogen filled glovebox, a mixture of **10b** and **10c** (15 mg, 26  $\mu\text{mol}$ ) were diluted in dichloromethane- $d_2$  (0.5 mL) and added to a J. Young NMR tube. Initially the solution was colorless, but after 5 minutes the solution was tan. After an hour the solution was yellow.

### Isomer Chlorination Spectra

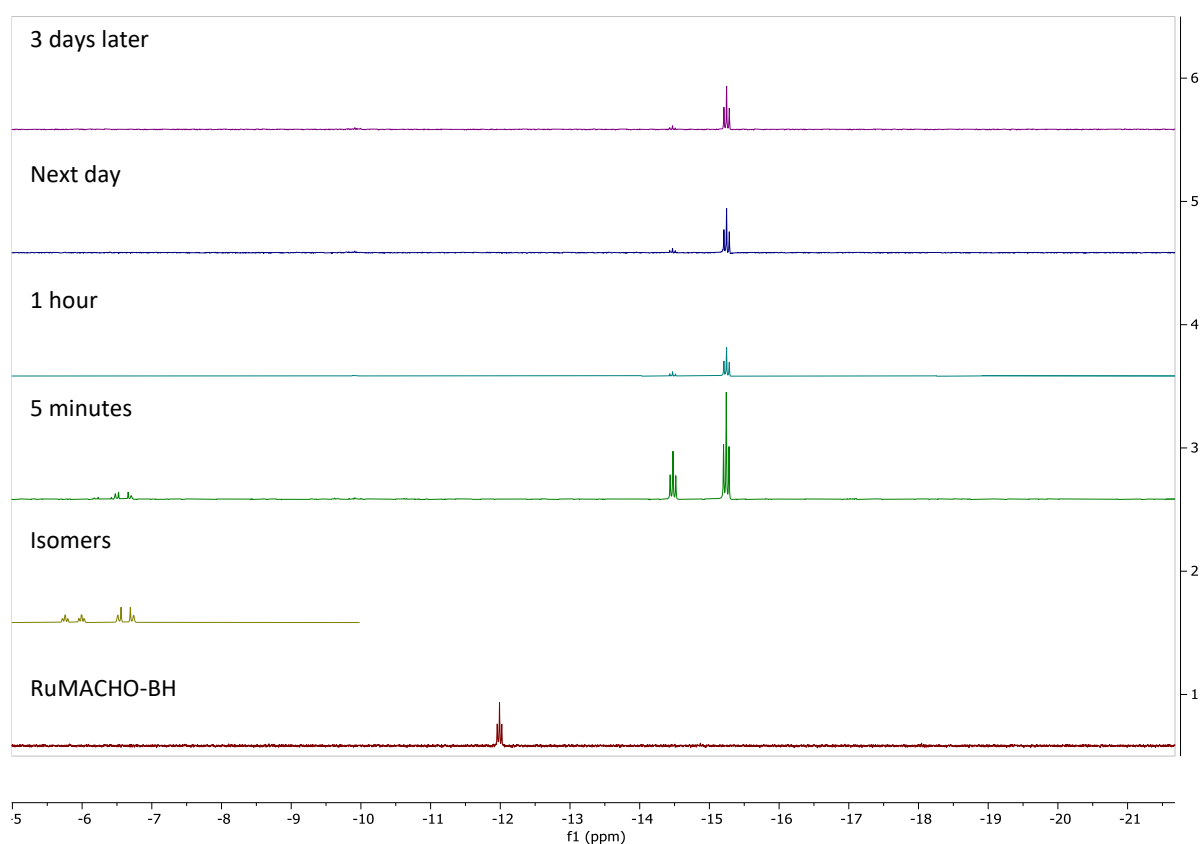

**Figure S87:**  $^1\text{H}$  spectra over time of **10c** & **10b** in deuterated dichloromethane- $d_2$ .

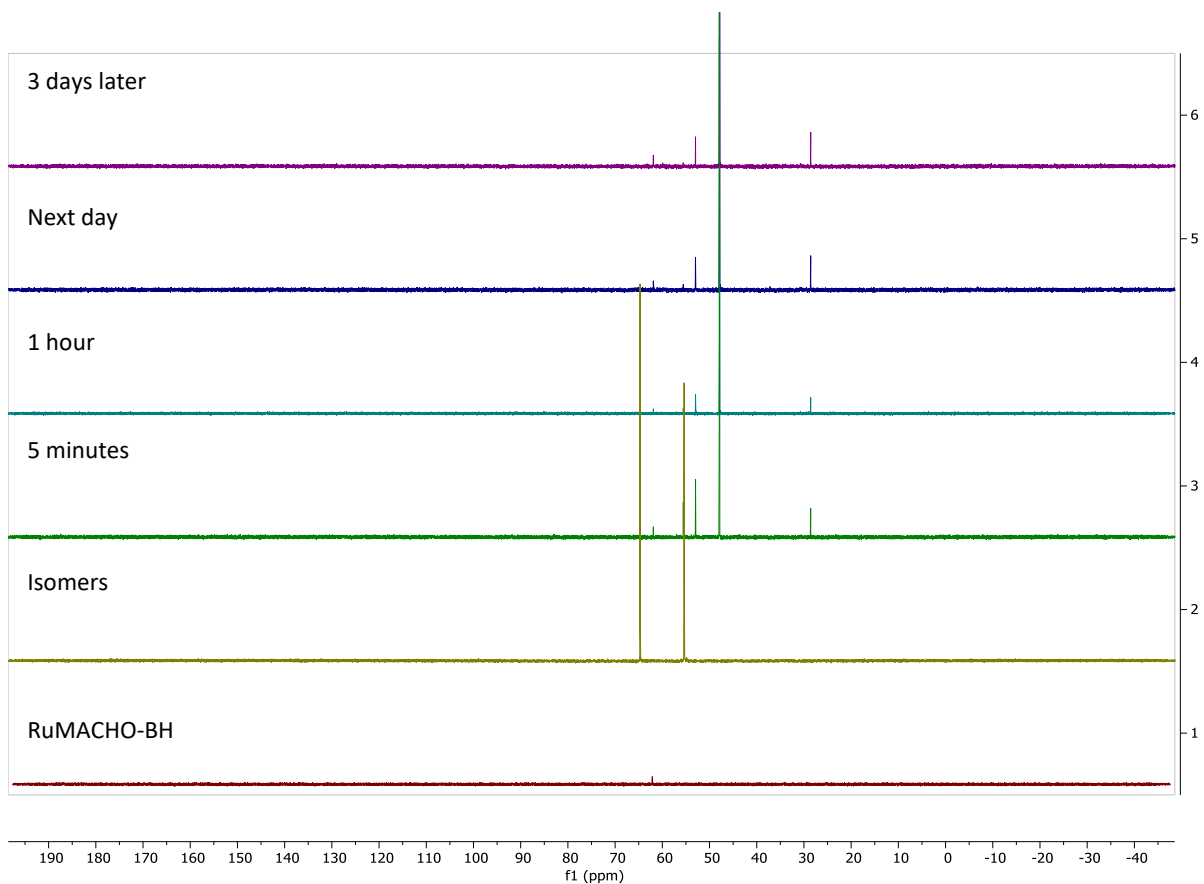

Figure S88:  $^{31}\text{P}$  spectra over time of **10b** & **10c** in dichloromethane- $d_2$ .

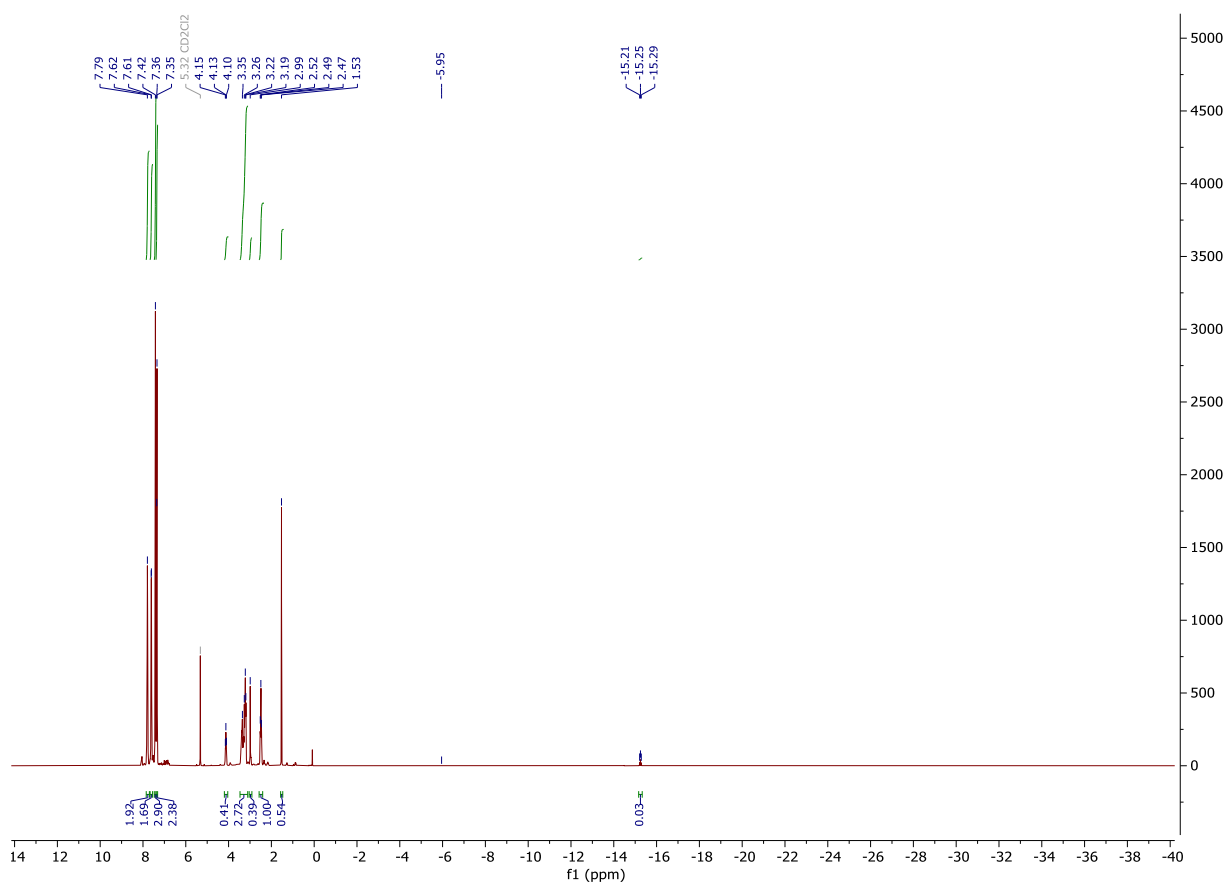

Figure S89:  $^1\text{H}$  spectra over time of **10b** & **10c** after 3 days in dichloromethane- $d_2$ .

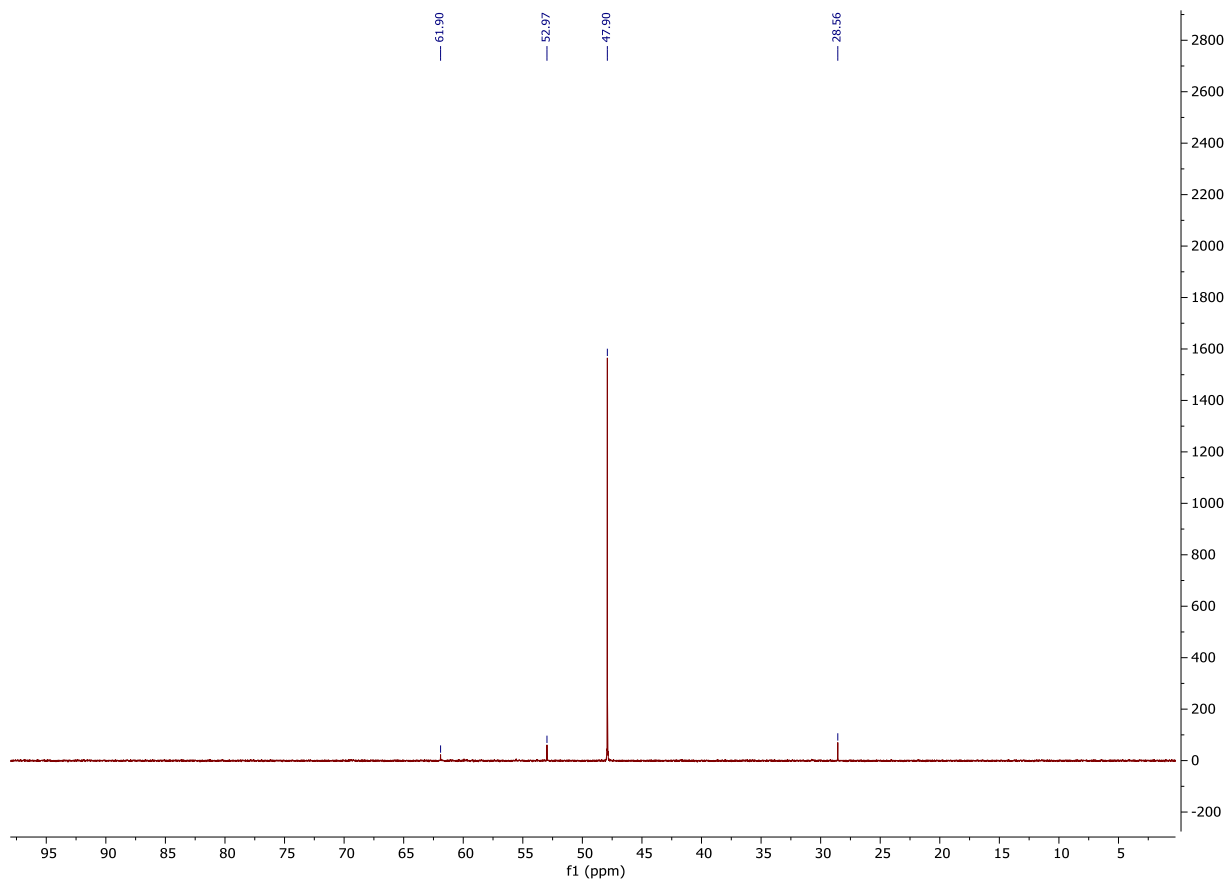

Figure S90:  $^{31}\text{P}$  spectra over time of **10b** & **10c** after 3 days in dichloromethane- $d_2$ .

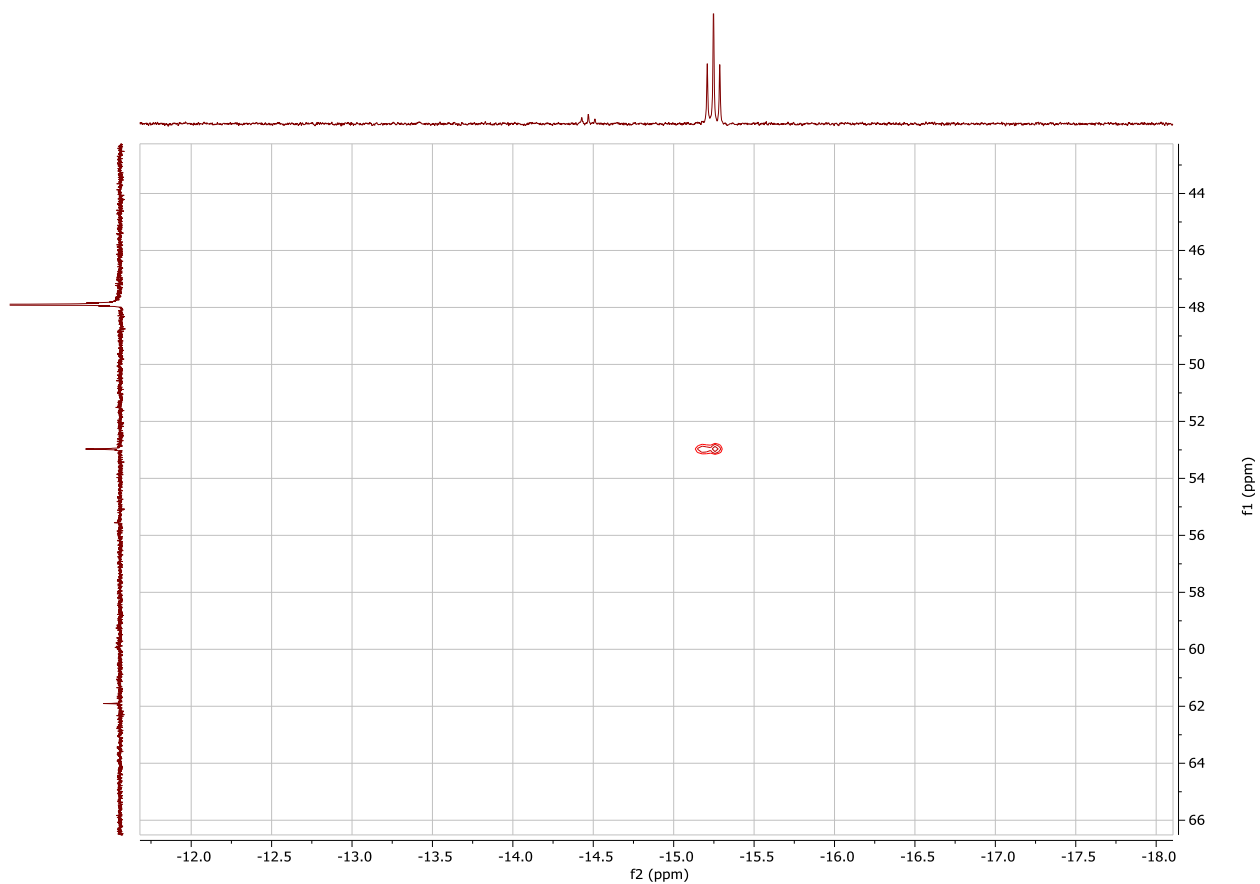

Figure S91:  $^1\text{H}$ - $^{31}\text{P}$  HMBC of chlorination reaction after 3 days in dichloromethane- $d_2$ . Major species in phosphorous spectra is not associated with hydride in proton spectrum.

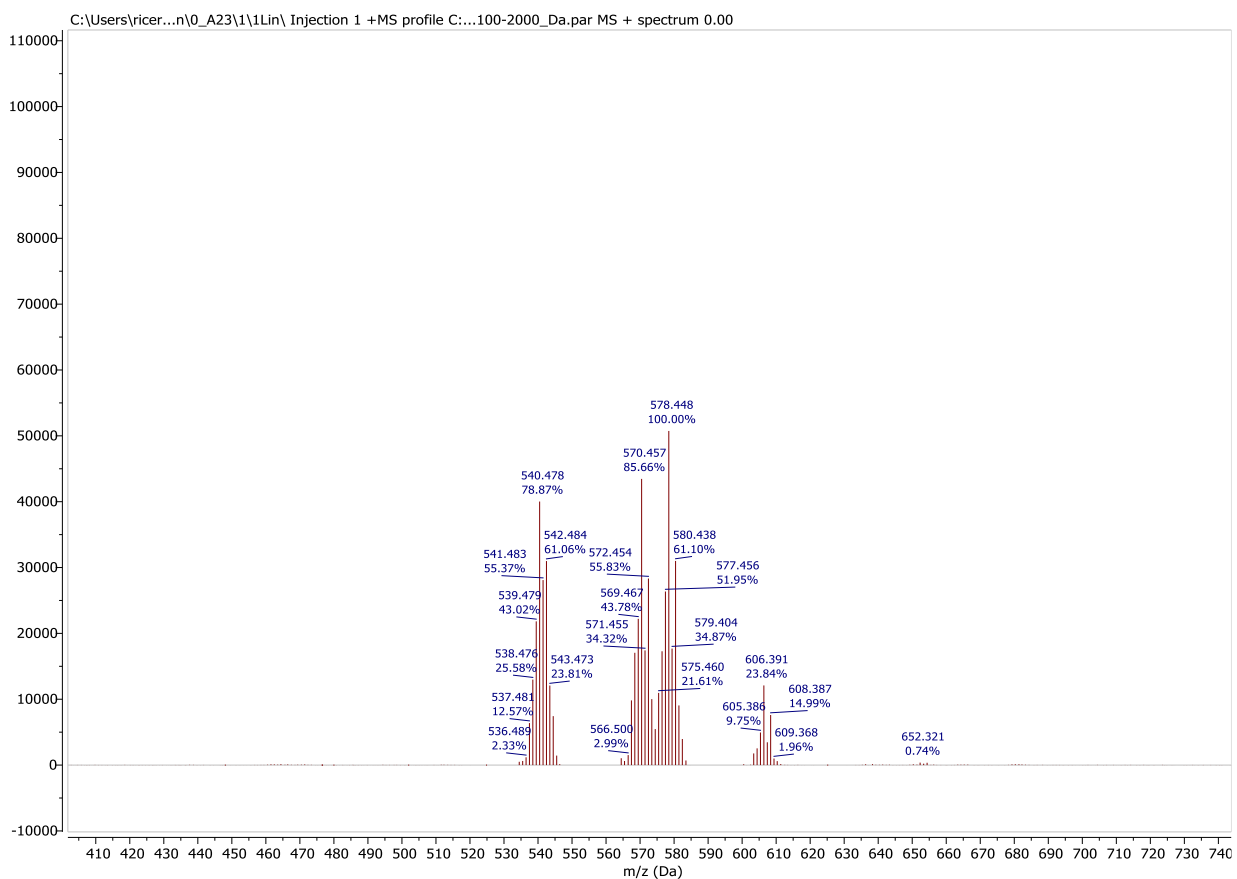

**Figure S92:** MALDI  $[M^+]$  of chlorinated products. Calculated  $m/z = 641.0145$ ; Found  $m/z = 606.391$ , corresponding to single chloride loss.

### Excess KOH Reaction

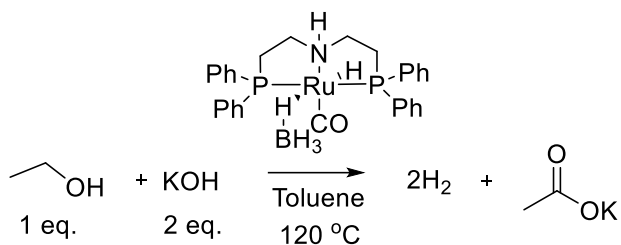

In a nitrogen filled glovebox, potassium hydroxide (1.28 g, 19.7 mmol), ethanol (200 proof, 0.46 g, 10 mmol), and **10** (46 mg, 78  $\mu\text{mol}$ ) were combined with toluene (10 mL, distilled from benzophenone ketyl) in a Schlenk flask. The flask was sealed with a septum and brought out of the glovebox where it was attached to a water eudiometer via a needle and tubing. The flask was then lowered into an oil bath at 120  $^\circ\text{C}$  and allowed to stir until no more gas was produced (4 hours, 22 minutes). The flask was returned to the glovebox where an NMR sample was prepared in toluene- $d_8$  (0.7 mL). After NMR, the sample was combined back into the flask which was filtered and concentrated to dryness. Another NMR sample was prepared in  $\text{C}_6\text{D}_6$  (700  $\mu\text{L}$ ); again, afterwards it was added back the mixture, which was dissolved in benzene, filtered, and evaporated to dryness. The remaining solid was dissolved in benzene and recrystallized from slow addition of hexanes.

### Excess KOH Reaction Spectra

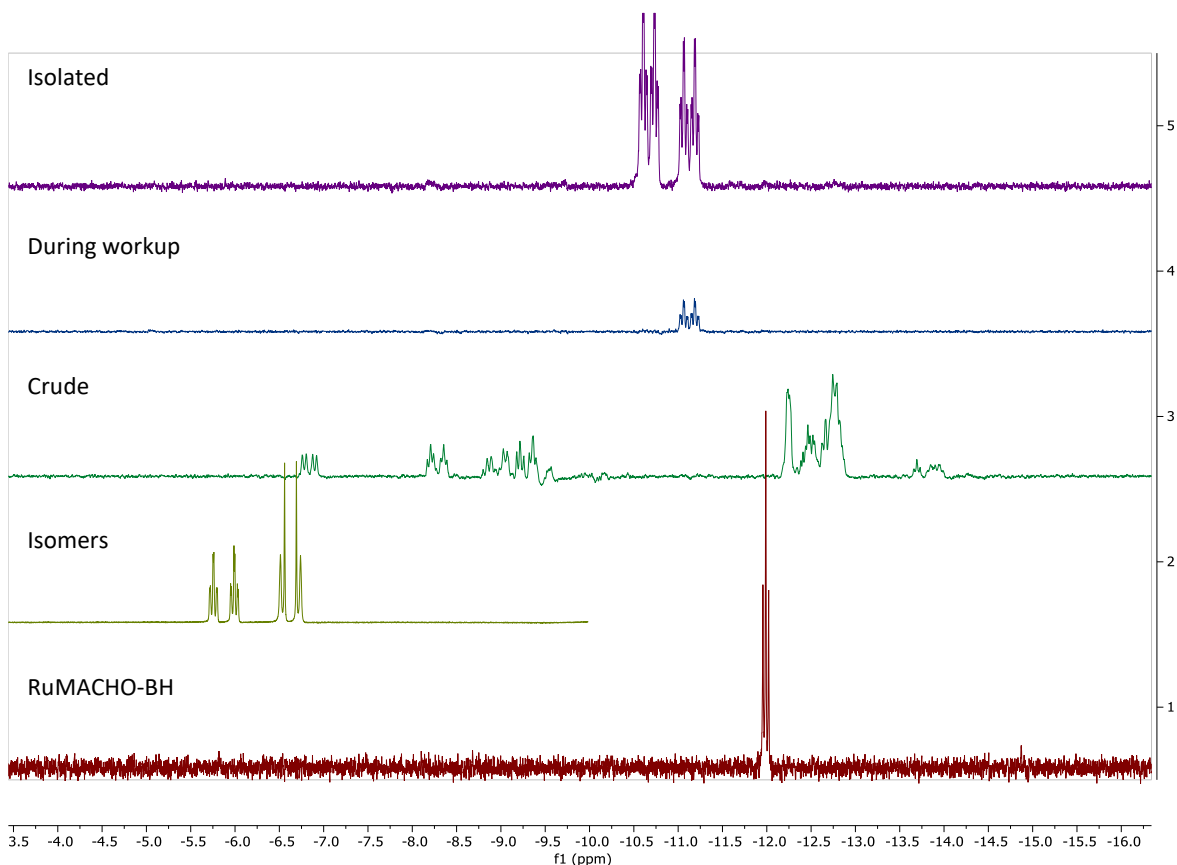

**Figure S93:**  $^1\text{H}$  spectra of the reaction mixture over time compared to isomers and complex **10**.

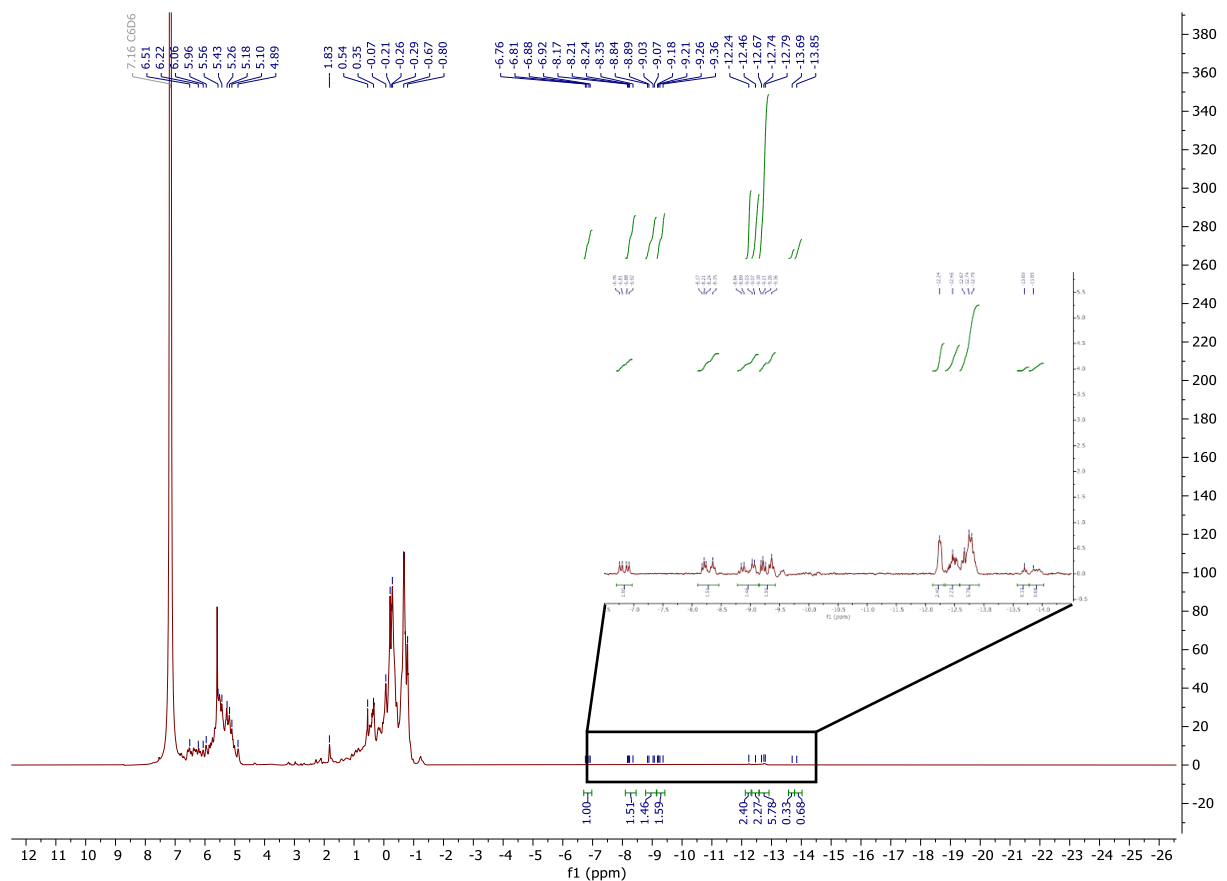

Figure S94:  $^1\text{H}$  spectrum of crude reaction mixture in  $d_8$ -toluene.

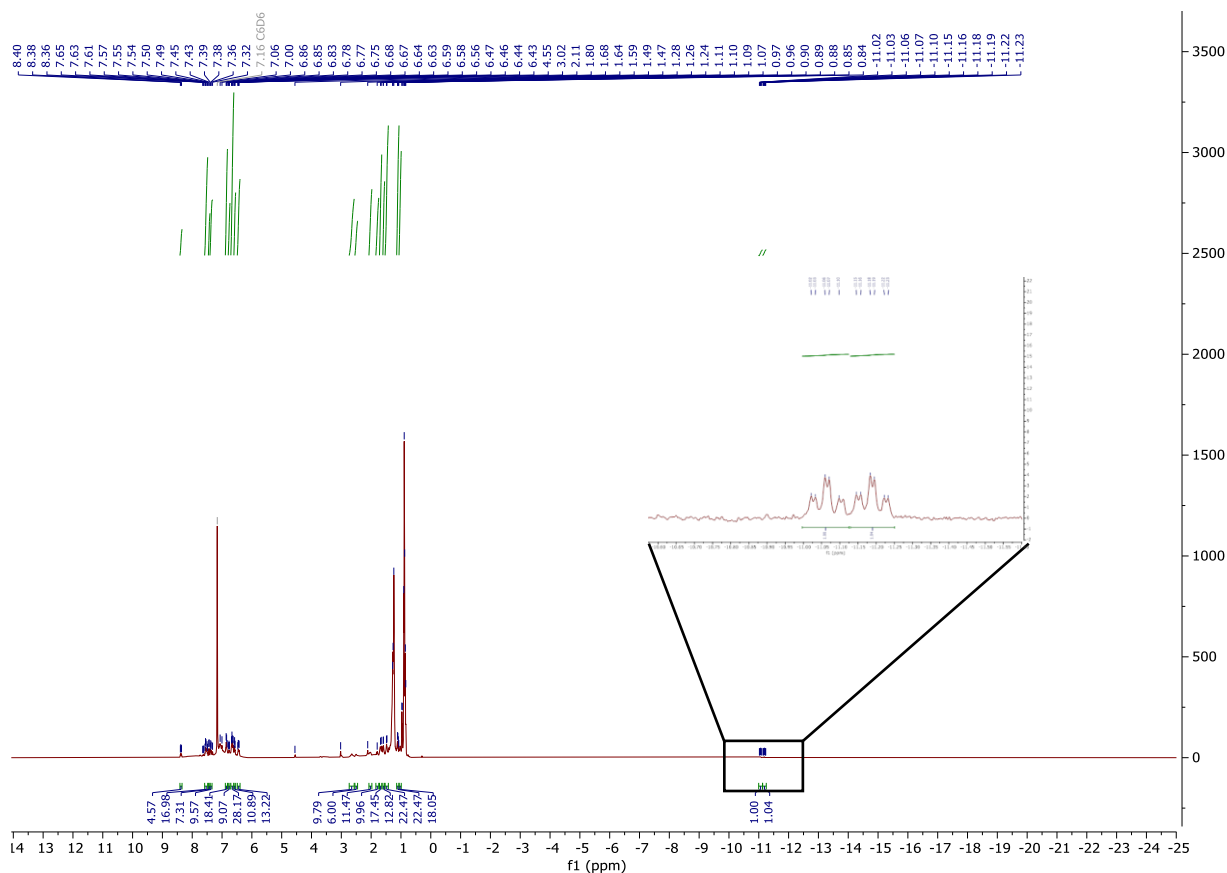

Figure S95:  $^1\text{H}$  spectrum of reaction mixture during work up in  $\text{C}_6\text{D}_6$ .

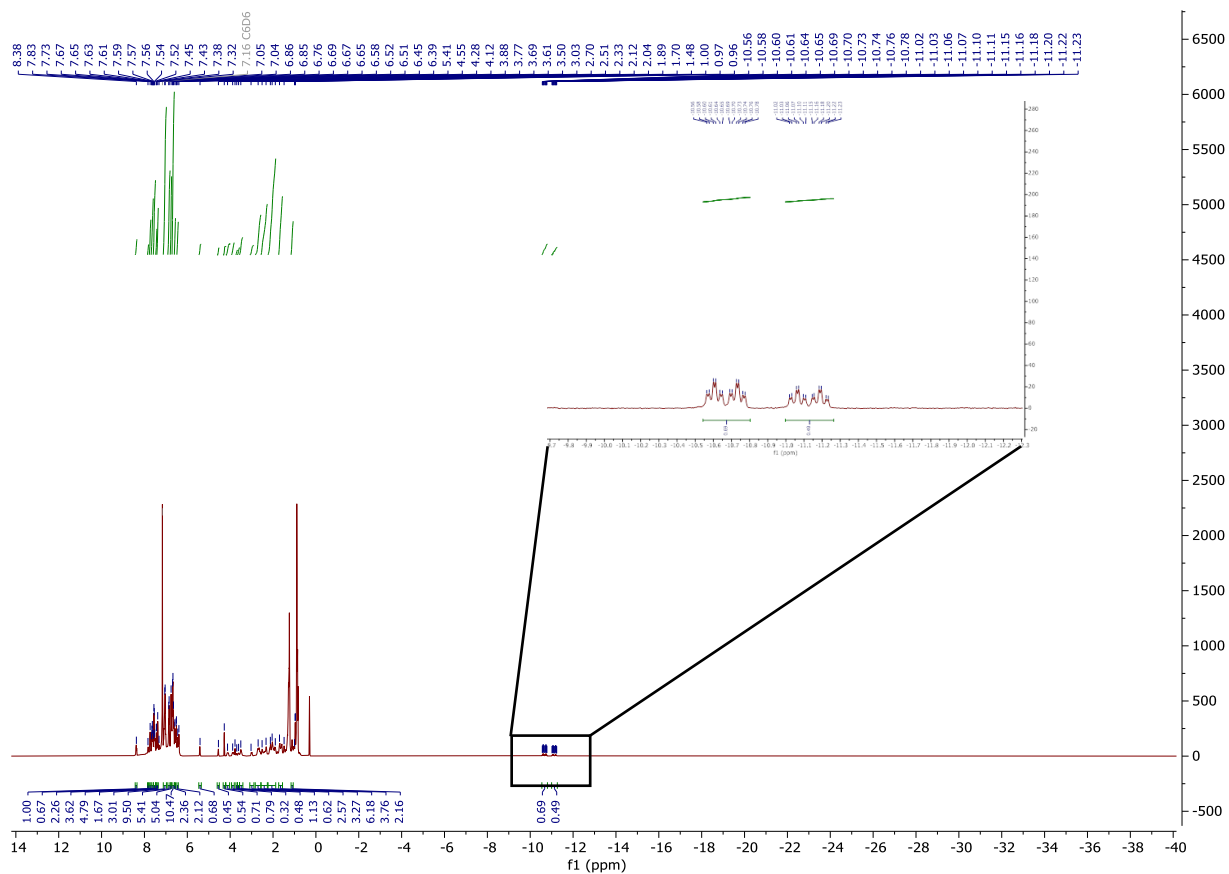

Figure S96: <sup>1</sup>H spectrum of isolated species after recrystallization in C<sub>6</sub>D<sub>6</sub>.

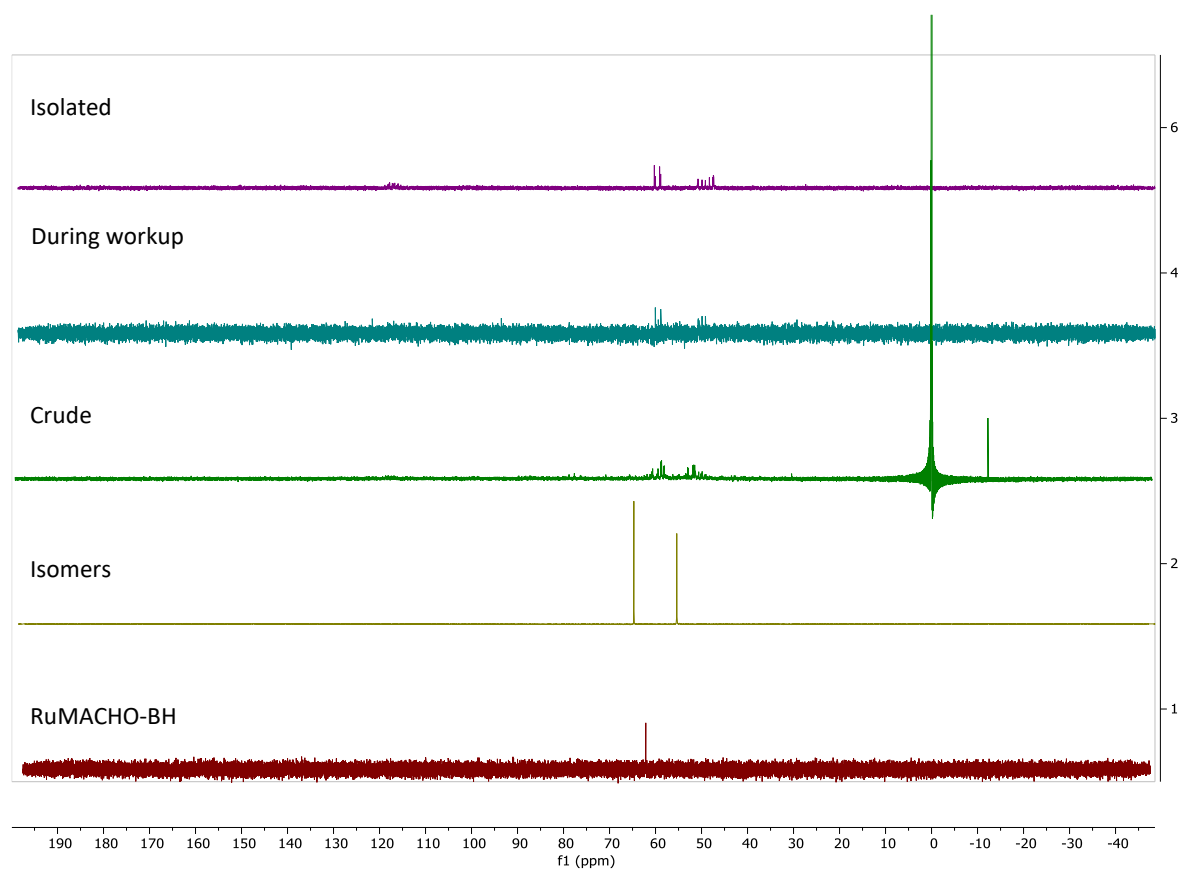

Figure S97: <sup>31</sup>P spectra of the reaction mixture over time compared to isomers and complex 10.



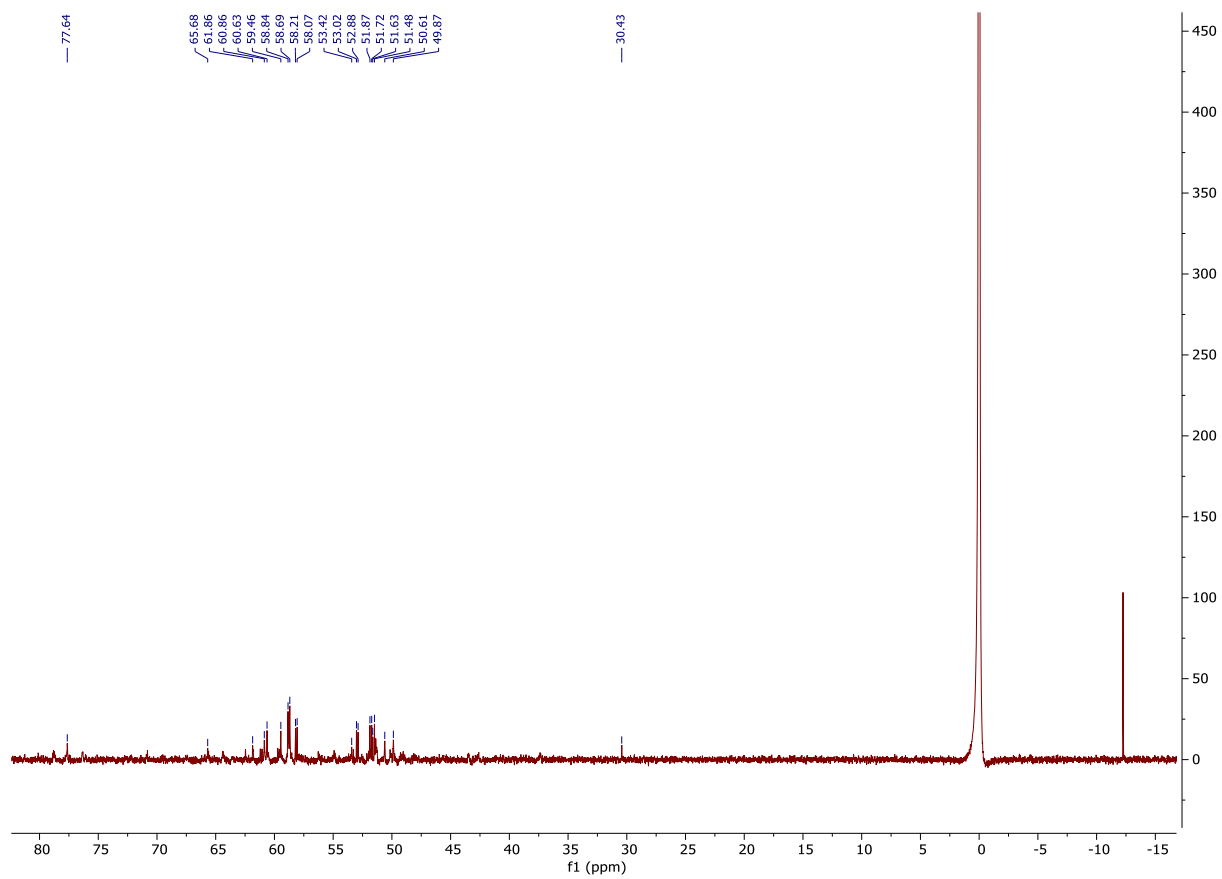

Figure S98:  $^{31}\text{P}$  spectrum of crude reaction mixture.

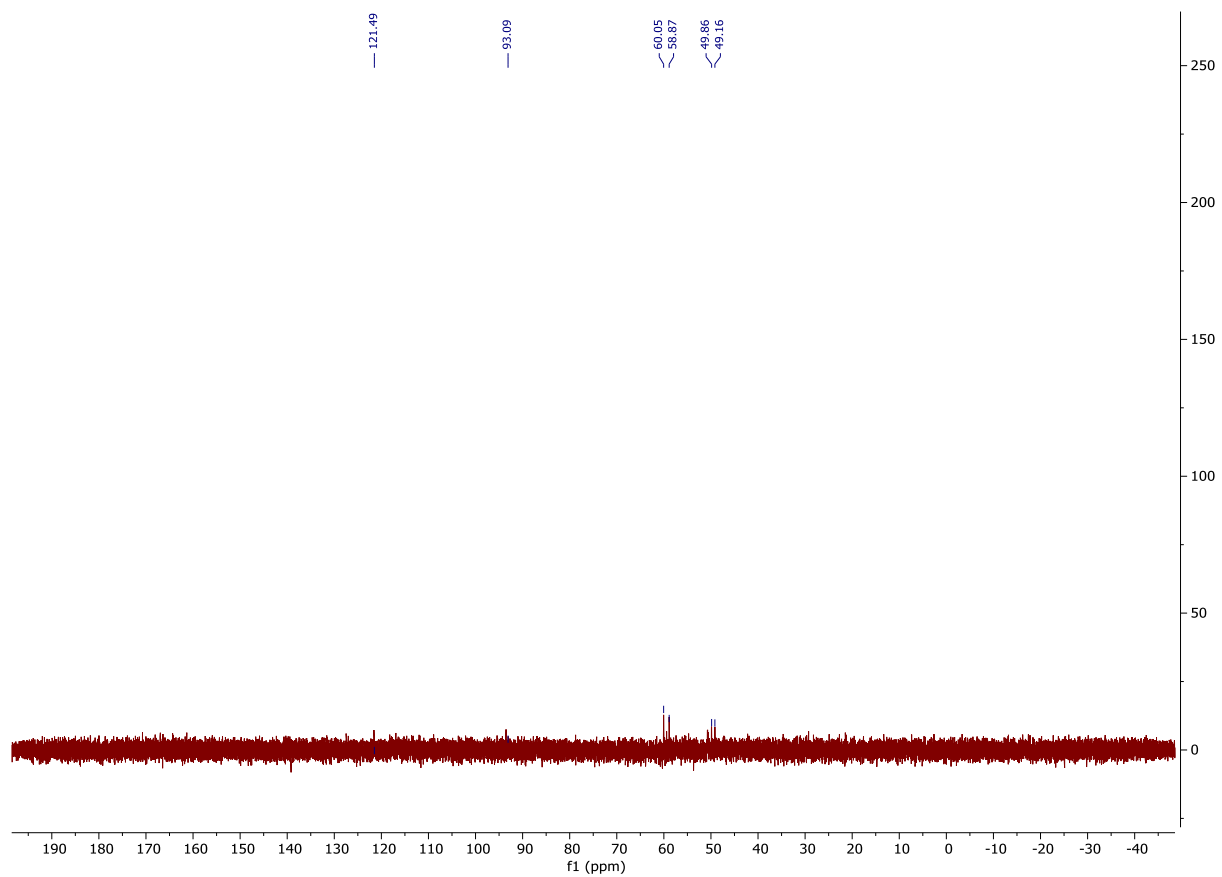

Figure S99:  $^{31}\text{P}$  spectra of reaction mixture during workup.

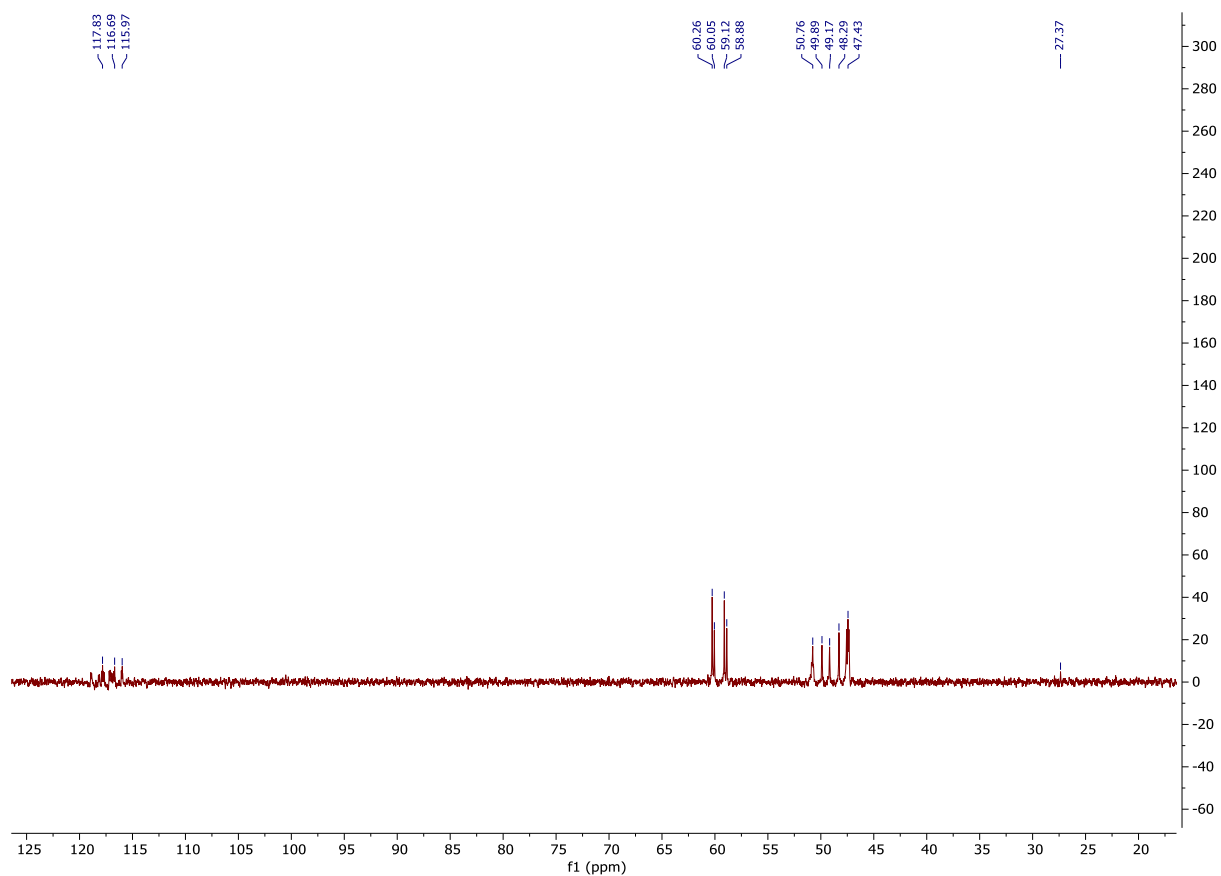

Figure S100:  $^{31}\text{P}$  spectrum of isolated complex compound.

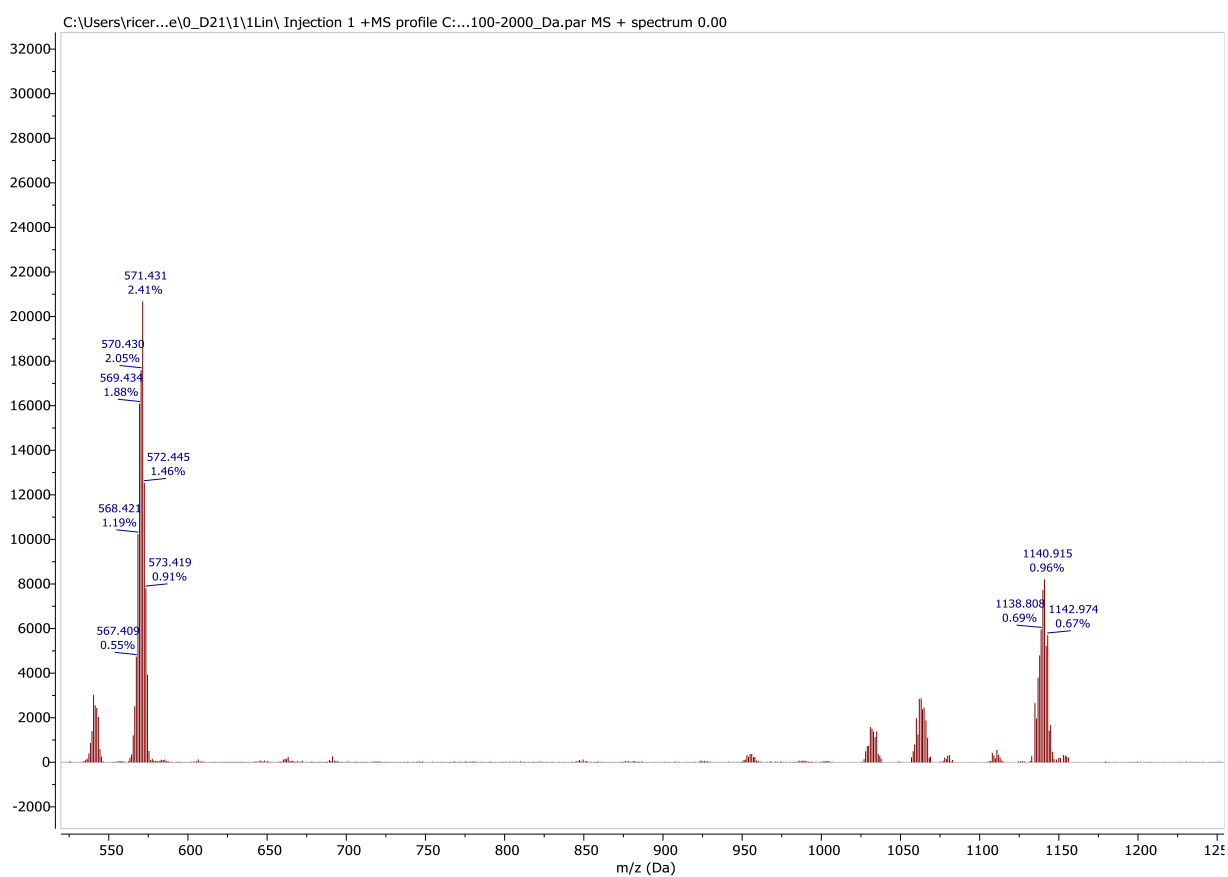

Figure S101: MALDI  $[\text{M}^+]$  spectrum of pure product with anthracene matrix. Proposed structures below.<sup>2</sup>

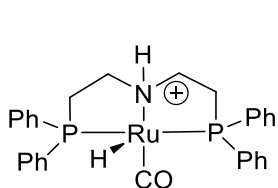

$m/z = 572.08$

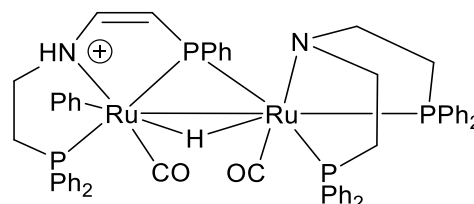

$m/z = 1141.15$

### Treatment of RuMACHO-BH with t-BuOK

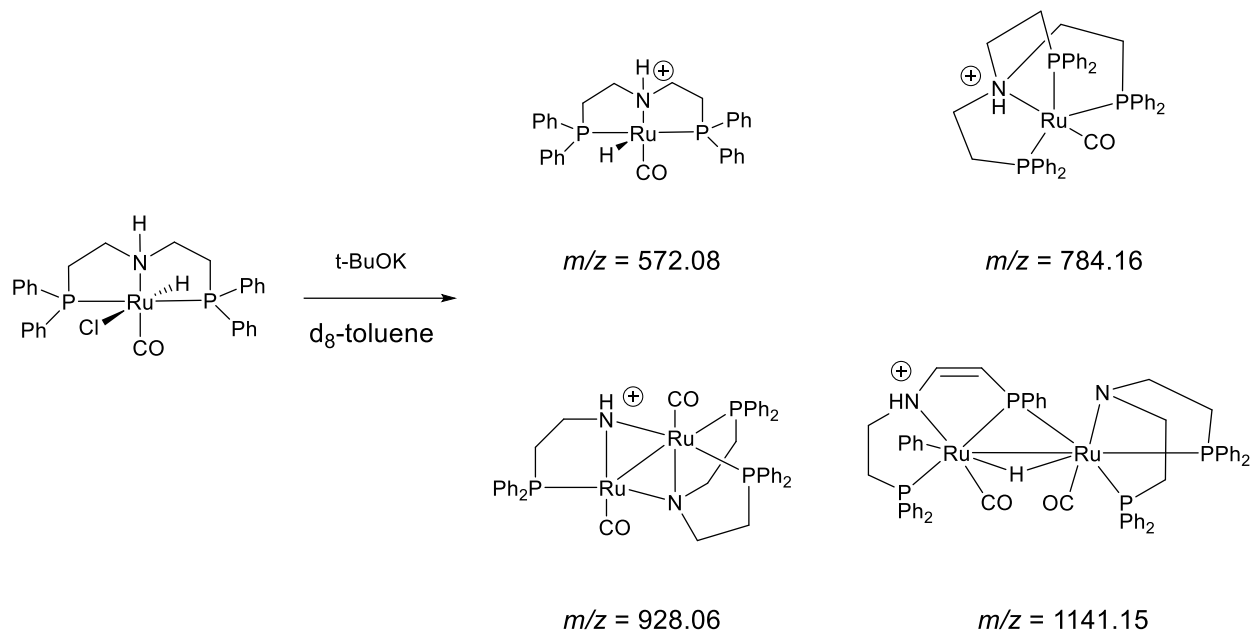

In a J. Young NMR tube, RuMACHO (**10**) was combined with potassium *tert*-butoxide in deuterated toluene and allowed to react for one week taking the solution from milky white to orange. Resulting peaks did not match those observed through our NMR experiments, MALDI peaks correspond to those observed by Anaby et al.<sup>2</sup>

### Treatment of RuMACHO with t-BuOK Spectra

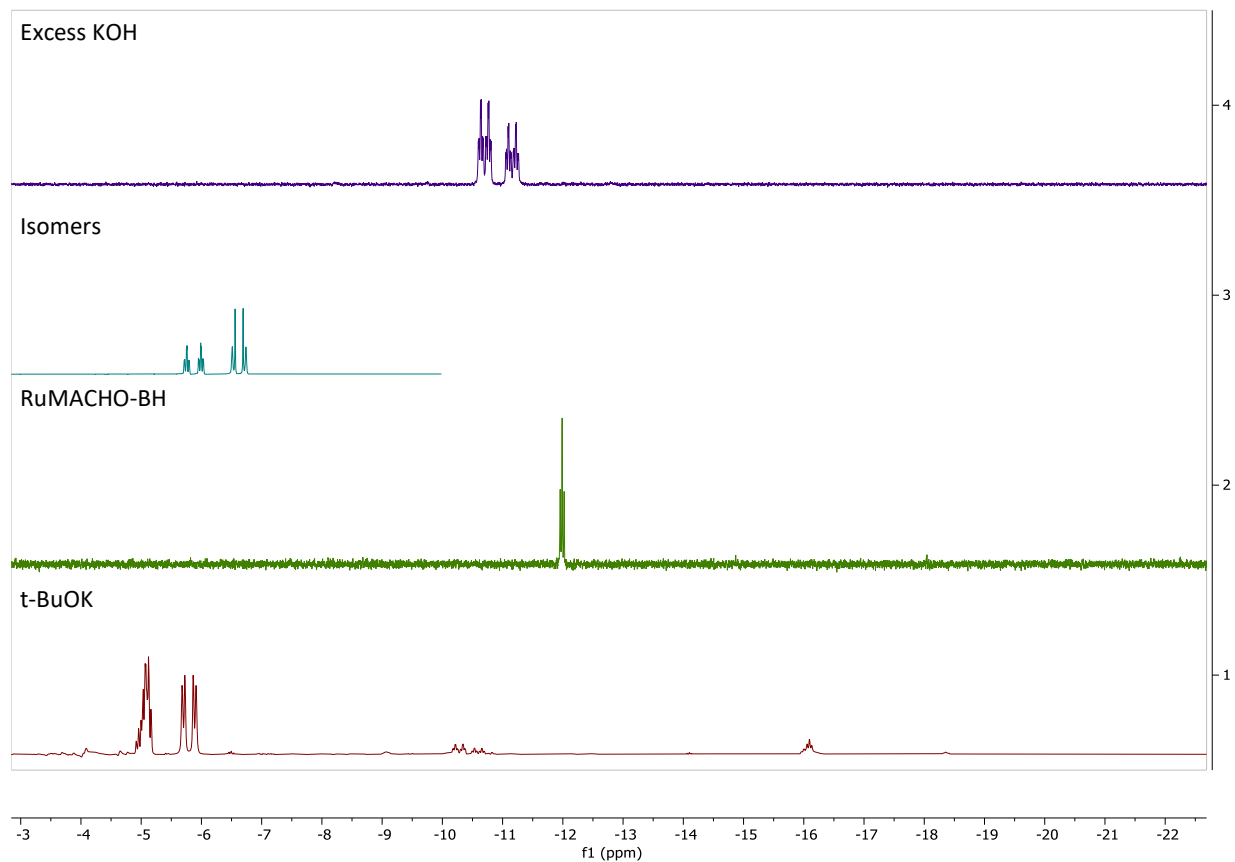

**Figure S102:**  $^1\text{H}$  spectra of the reaction mixture compared to isomers, complex **10**, and excess potassium hydroxide reaction.

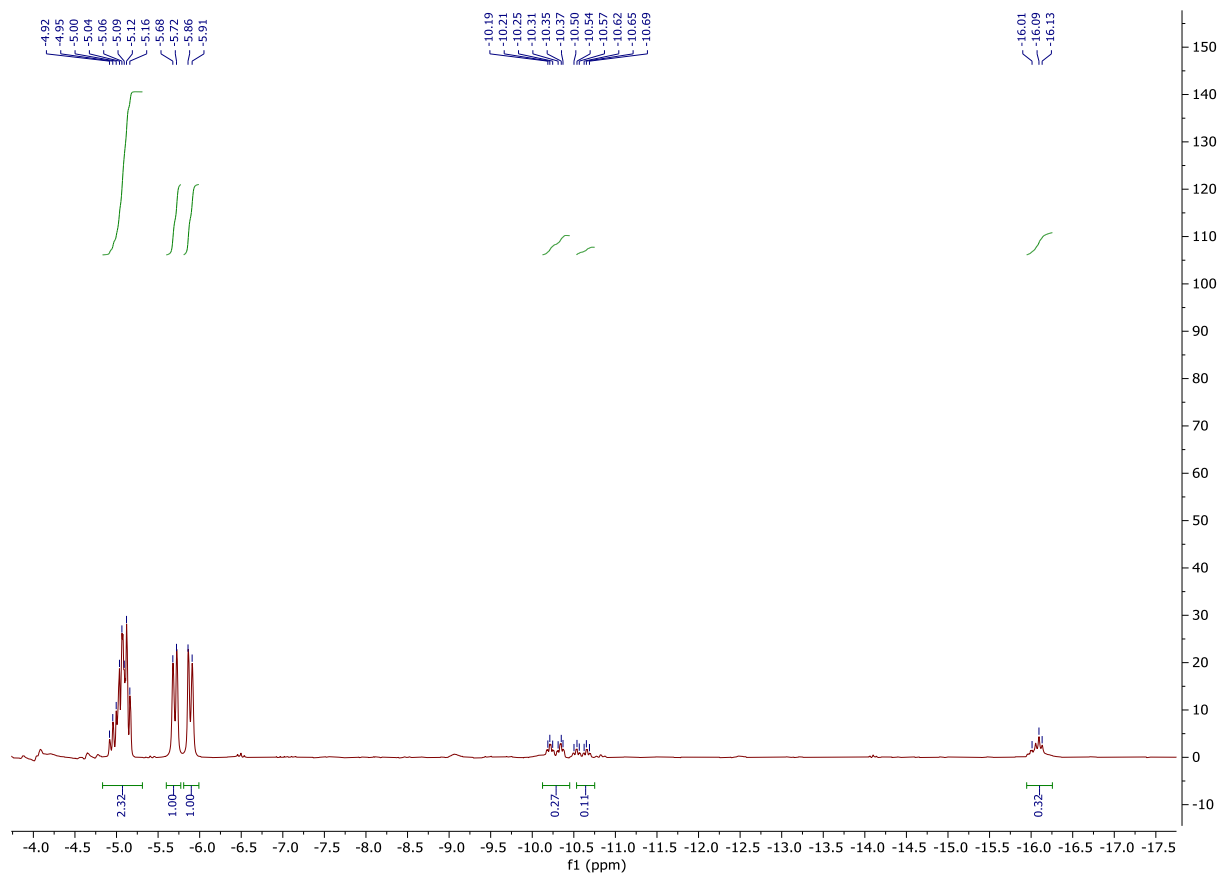

Figure S103:  $^1\text{H}$  spectra of the reaction mixture in toluene- $d_8$ .

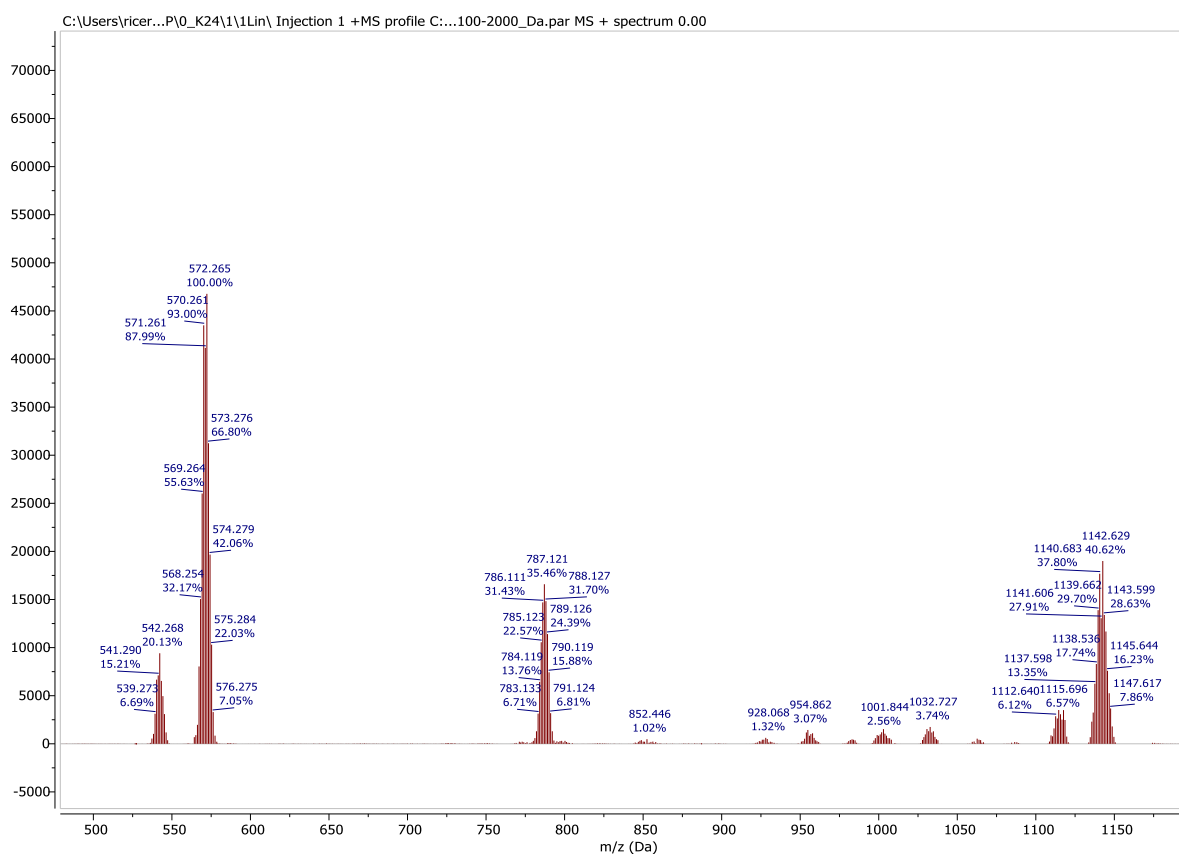

Figure S104: MALDI  $[M^+]$  spectrum of product mixture. Proposed structures above.<sup>2</sup>

### Analysis of Homogeneity for Catalysis for **10**

Visual inspection of ambient dehydrogenation reactions with **10** fails to show whether homogenous or heterogenous catalysis is taking place. Upon filtration of the dehydrogenation reaction mixtures (refer to **Large Scale Reactions using catalyst 10**), the color of the solution remains yellow. Upon recharging these solutions with more ethanol and potassium hydroxide, they remain catalytically active for ethanol dehydrogenation.

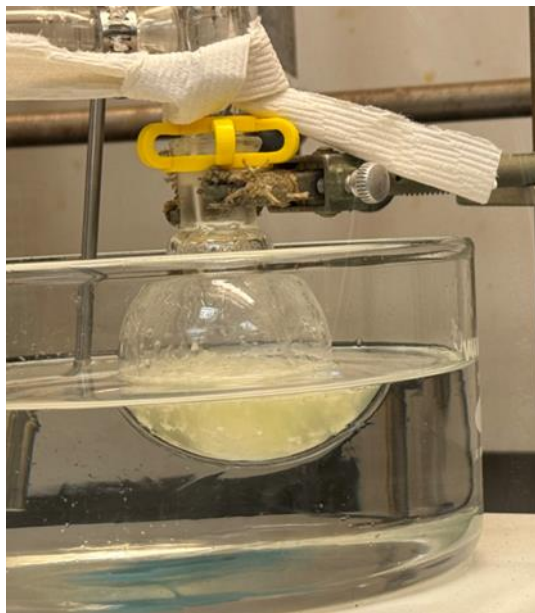

**Figure S105:** Reaction involving **10**.

### Mercury Drop Test

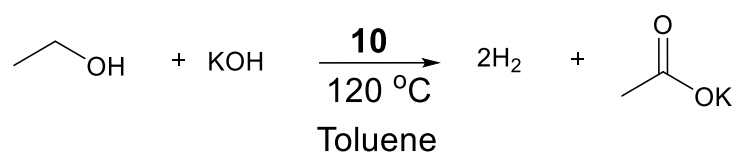

In a nitrogen filled glovebox, ground potassium hydroxide (561 mg, 8.60 mmol), **10** (0.1 mol% with respect to ethanol, 11.7 mg, 20  $\mu\text{mol}$ ), and ethanol (200 proof, 0.92 g, 20 mmol) were added to the round bottom flask with toluene (10 mL, distilled from benzophenone ketyl). Outside the glovebox, the flask was sealed with a condenser and septa connected via needle and tubing to a water eudiometer to determine the approximate progress of each reaction. The flask was then lowered into an oil bath at 120  $^\circ\text{C}$  and allowed to reflux. After 17 minutes, the reaction was paused, flask sealed, and returned to the glovebox where mercury (40 mg, 200  $\mu\text{mol}$ ) was added. The flask was brought out of the box and restarted. No change in catalysis under vigorous stirring was observed. The reaction passes the mercury drop test for homogenous catalysis.<sup>3</sup>

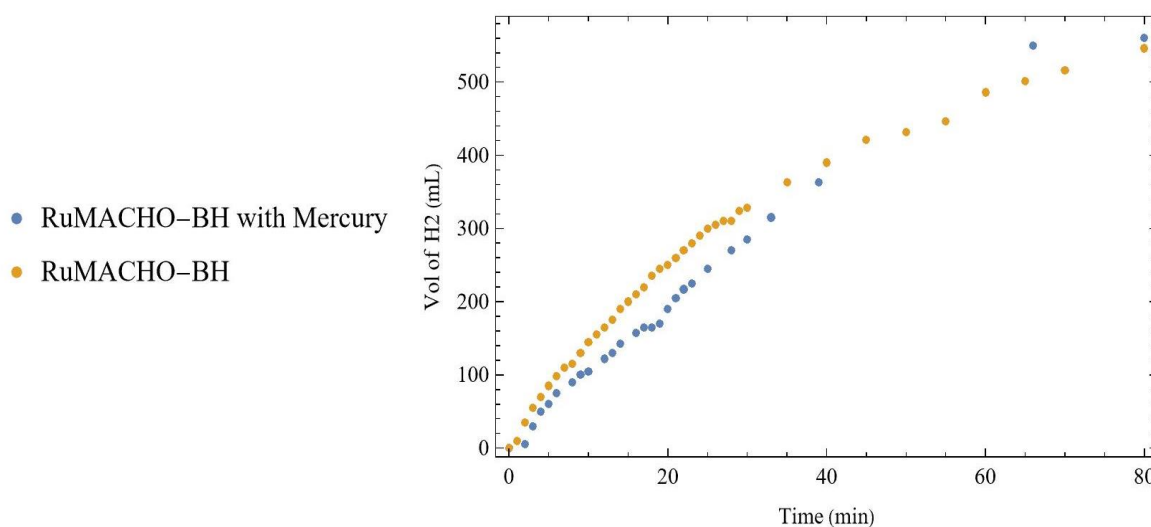

Figure S106: Volume of hydrogen produced over time for **10** with (orange trace) and without mercury (blue trace).

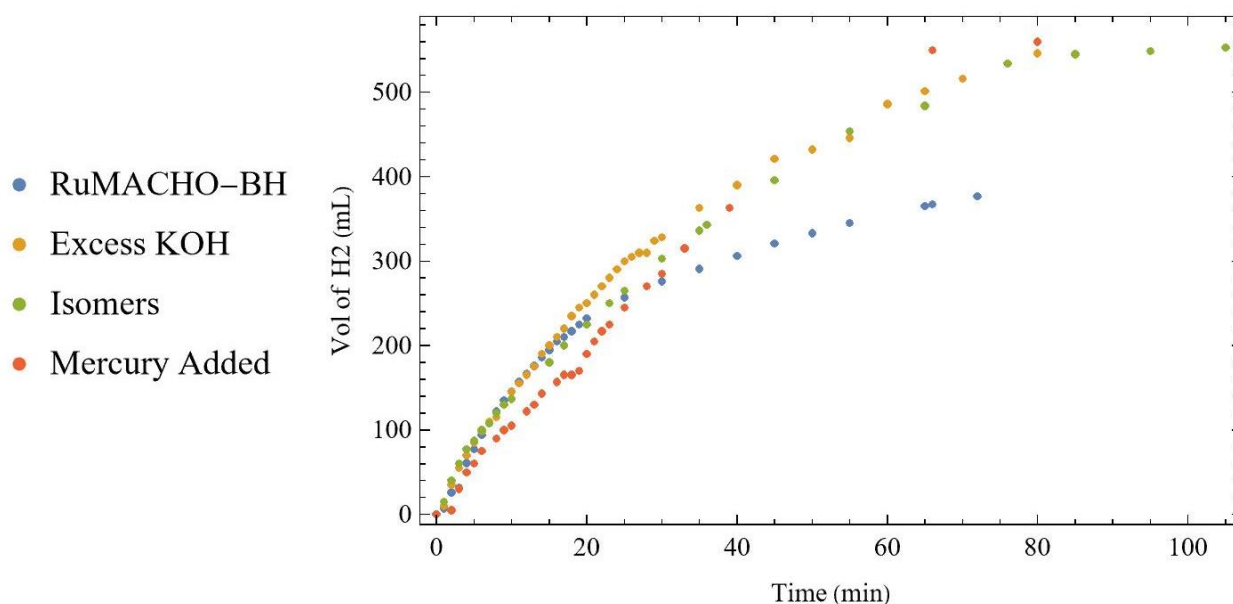

Figure S107: Reproducibility of reaction kinetics with **10**.

### Preparative procedure for complex 5

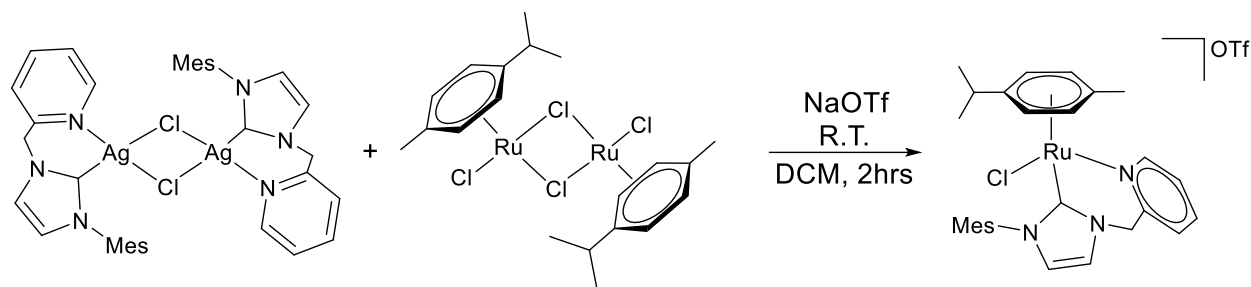

In a nitrogen filled glovebox, dichloro-di(1-(2,4,6-trimethylphenyl)-3-(2-picolyl)-imidazol-2-ylidene)-disilver(I) (125 mg, 0.150 mmol, Catapower Inc.), in dichloromethane (5 mL, dried by JC Meyer solvent purification system). This was added dropwise to a stirring solution of dichloro(p-cymene) ruthenium (II) dimer (91.9 mg, 0.15 mmol, Strem) in dichloromethane (20 mL) in a 100 mL Schlenk flask. After 1 hour, sodium trifluoromethanesulfonate (51.6 mg, 0.300 mmol, Strem) was also added to the mixture. After 30 more minutes of stirring, the solution was filtered through a dry pad of celite to remove solid products. The solvent was evaporated under reduced pressure to yield a yellow, glassy solid. This solid was dissolved in dichloromethane (5 mL), and hexanes (20 mL, dried by JC Meyer solvent purification system) was added to the solution. A deep yellow-orange crystalline solid was acquired (182 mg, 87%).

m. p. 179.3-196 °C (decomposition).

$^1\text{H}$  NMR (400 MHz, acetone)  $\delta$ : 9.47 (d,  $J$  = 5.8 Hz, 1H), 8.07 (t,  $J$  = 7.6 Hz, 1H), 7.89 (d,  $J$  = 2.1 Hz, 1H), 7.82 (d,  $J$  = 7.8 Hz, 1H), 7.52 (t,  $J$  = 6.8 Hz, 1H), 7.34 (d,  $J$  = 2.1 Hz, 1H), 7.16 (s, 1H), 6.98 (s, 1H), 5.96 (d,  $J$  = 6.3 Hz, 1H), 5.92 – 5.84 (m, 2H), 5.79 (d,  $J$  = 5.9 Hz, 0H), 5.55 (dd,  $J$  = 19.1, 6.3 Hz, 2H), 5.27 (d,  $J$  = 15.9 Hz, 1H), 2.35 (d,  $J$  = 2.0 Hz, 3H), 2.29 (d,  $J$  = 2.0 Hz, 3H), 1.72 (d,  $J$  = 2.1 Hz, 3H), 1.35 – 1.24 (m, 1H), 1.15 (dd,  $J$  = 6.9, 2.1 Hz, 3H), 0.61 (dd,  $J$  = 6.9, 2.1 Hz, 3H).

$^{13}\text{C}$  NMR (151 MHz,  $\text{CD}_2\text{Cl}_2$ )  $\delta$ : 175.22, 159.37, 156.57, 140.16, 140.00, 138.65, 135.86, 135.59, 130.13, 128.64, 125.76, 125.57, 124.88, 124.28, 109.54, 97.05, 90.27, 89.10, 87.85, 84.27, 55.28, 31.74, 23.97, 21.10, 20.36, 19.71, 18.52.

$^{19}\text{F}$  NMR (564 MHz,  $\text{CD}_2\text{Cl}_2$ )  $\delta$ : -78.87.

Elemental Analysis: Calculated: C 49.89%, H 4.91%, N 6.02%, S 4.59%, found: N 5.704%, C 49.780%, H 4.768%, S 4.705%

FTIR (KBr,  $\text{cm}^{-1}$ ): 1263, 1159, 1031, 638.

MALDI MS for  $\text{C}_{29}\text{H}_{34}\text{ClN}_3\text{Ru}$  calc'd 549.1640 g/mol; found  $m/z$  = 548.509 [M] $^+$ .

### Characterization Spectra of Complex 5

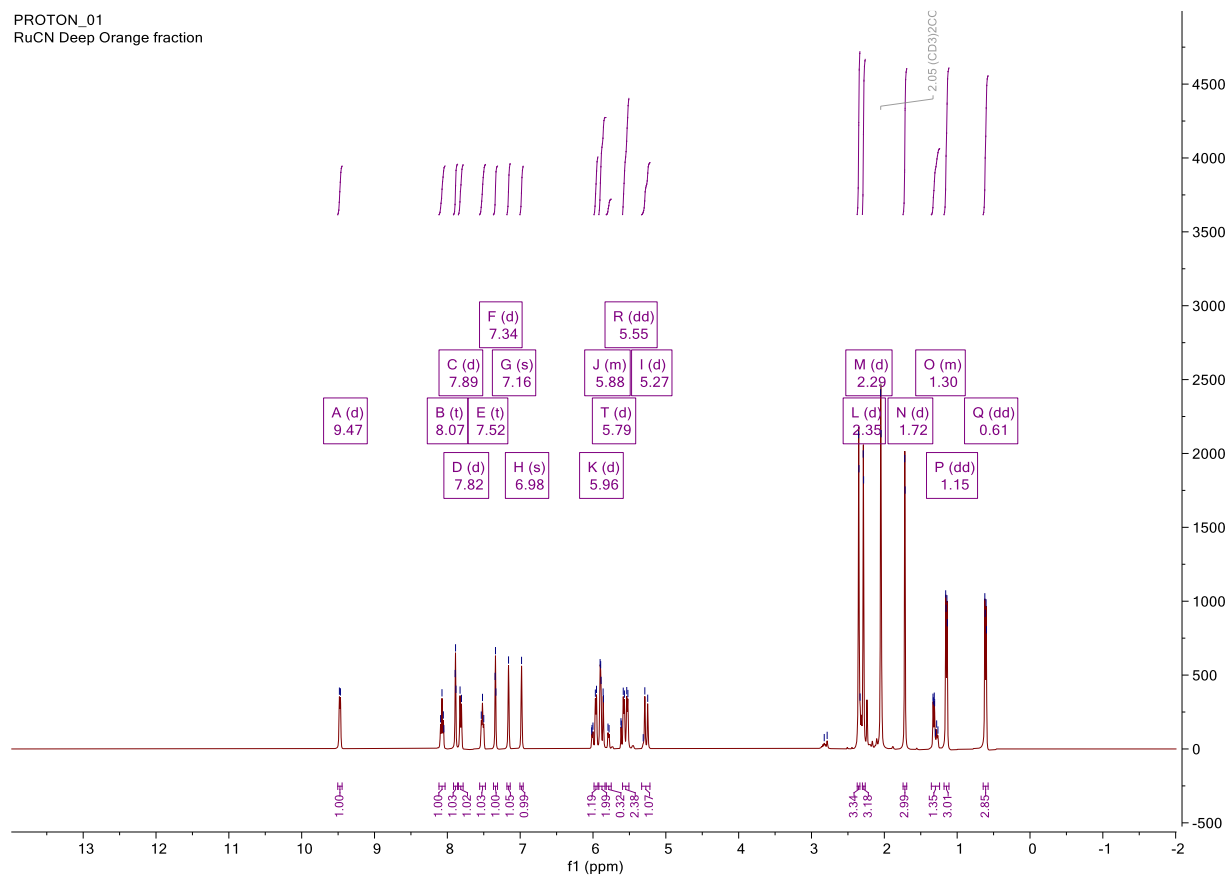

Figure S108:  $^1\text{H}$  spectrum of complex 5 in acetone- $d_6$ .

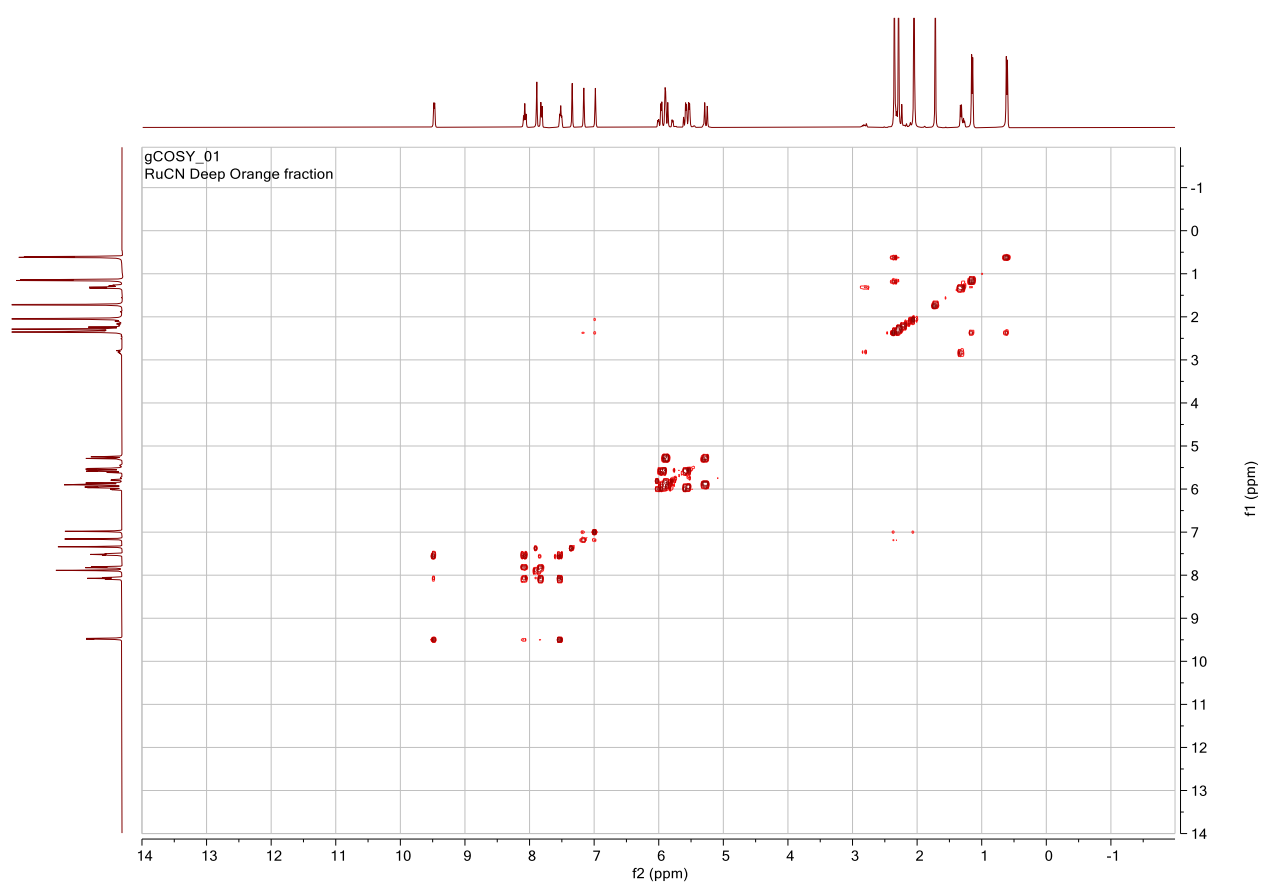

Figure S109:  $^1\text{H}$ - $^1\text{H}$  COSY spectrum of complex 5 in methylene dichloromethane  $d_2$ .



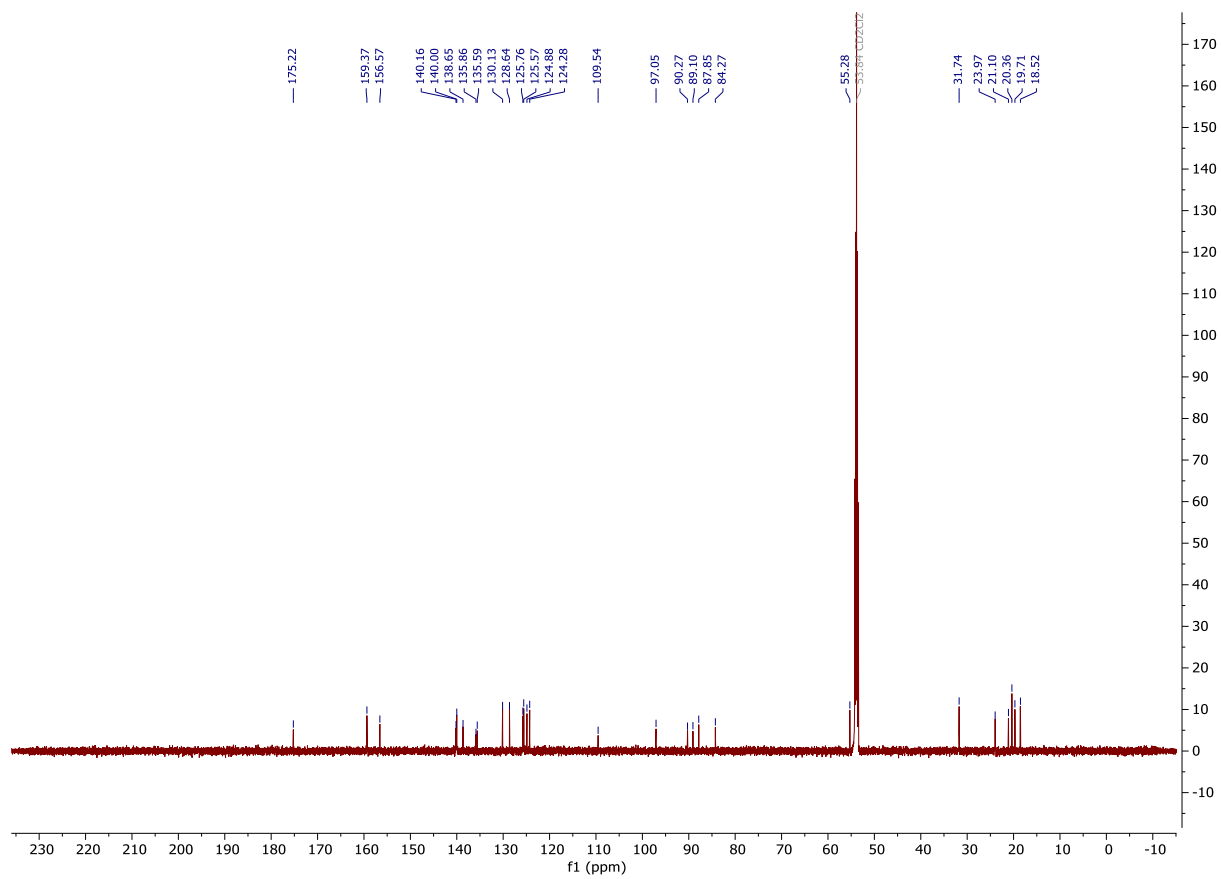

Figure S110:  $^{13}\text{C}$  spectrum of complex 5 in dichloromethane  $d_2$ .

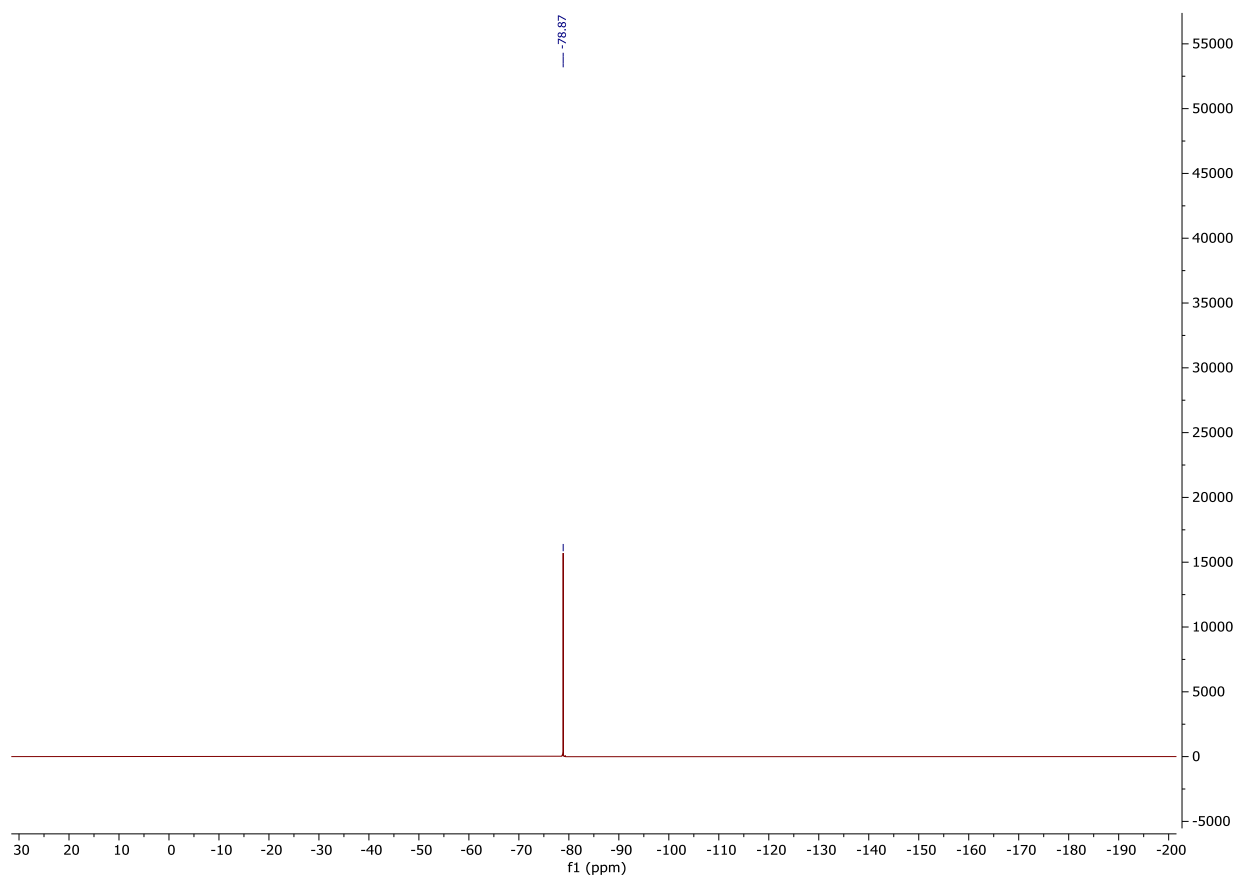

Figure S111:  $^{19}\text{F}$  spectrum of complex 5 in dichloromethane  $d_2$ .

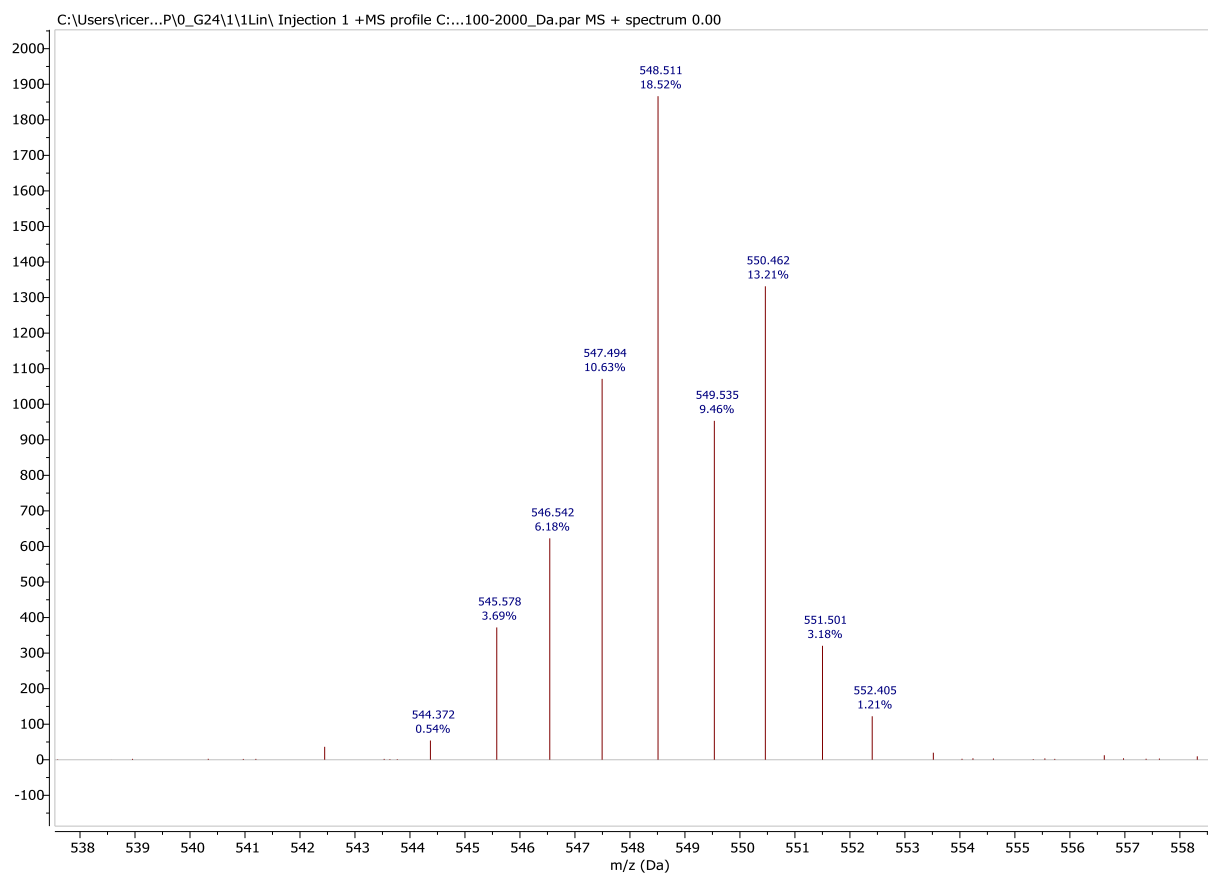

Figure S112: MALDI [M<sup>+</sup>] spectrum of complex 5.

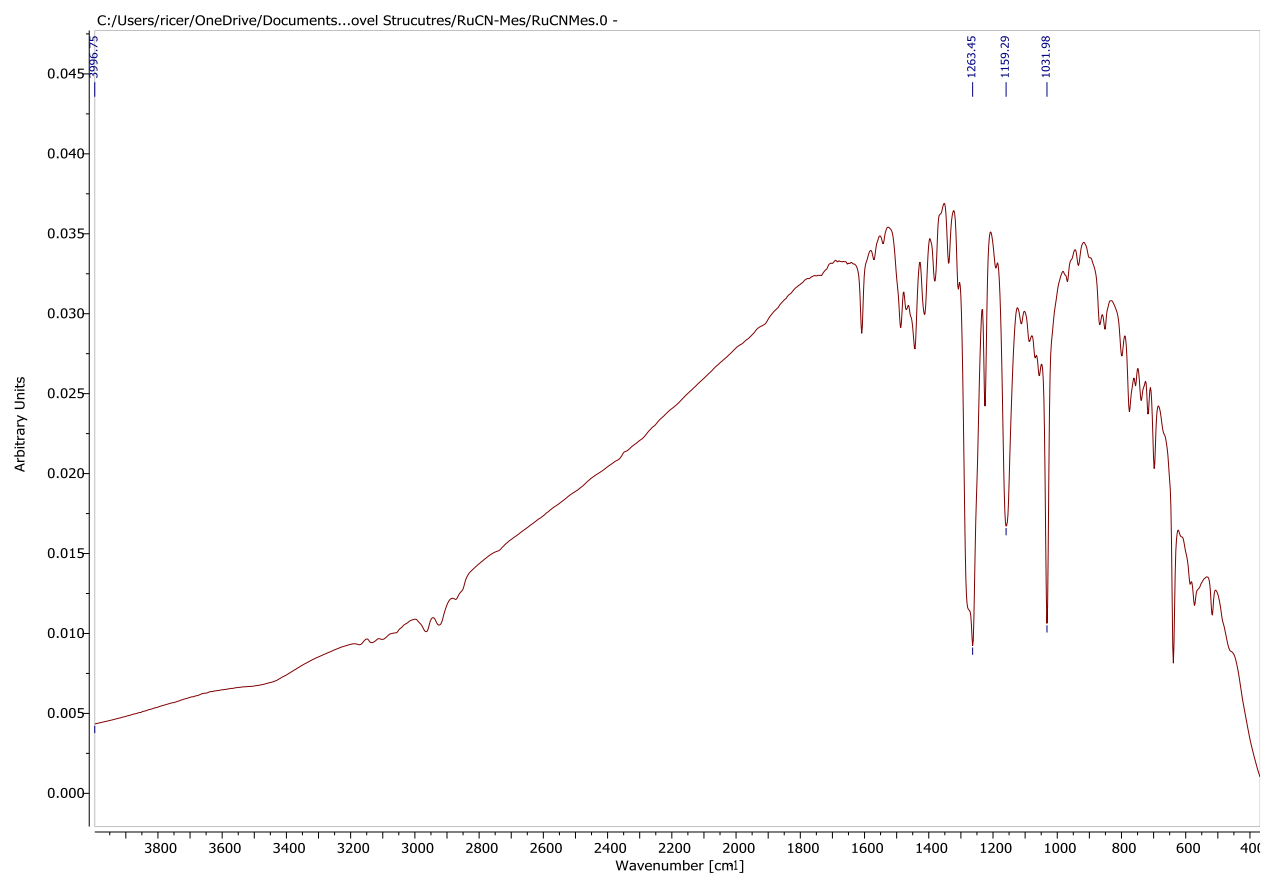

Figure S113: FTIR spectrum of complex 5.

### Preparative Procedure for complex 2

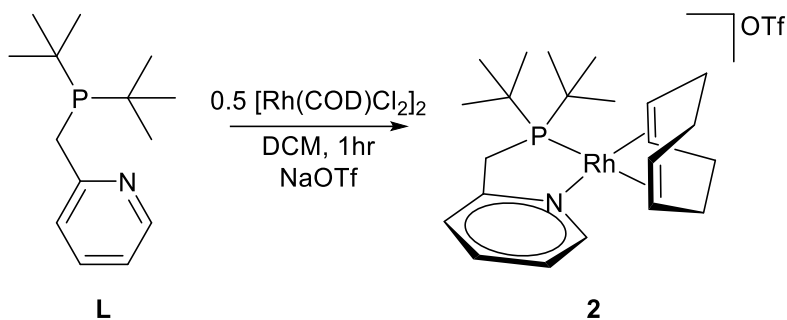

The (pyridyl)phosphine-ligand (**L**) was synthesized using previously reported methods from our lab.<sup>1</sup> The ligand (245 mg, 1.03 mmol) was diluted in dichloromethane (2 mL, dried by JC Meyer solvent purification system) in a 25 mL Schlenk flask and in vial 0.5 equivalents of cyclooctadiene rhodium dimer (235 mg, 480 μmol, Strem) was suspended with one equivalent of sodium triflate (250 mg, 1.4 mmol, Aldrich) in dichloromethane (5 mL, dried by JC Meyer solvent purification system). The ligand was added slowly dropwise to the dimer and silver triflate. The resulting suspension was allowed to stir for one hour at room temperature after which the solution was evaporated to dryness under reduced pressure, filtered, and recrystallized from dichloromethane and hexanes resulting in a light yellow-orange solid (400 mg, 66.8% yield).

Melting Point: 199-199.5 °C (decomposition)

<sup>1</sup>H NMR (600 MHz, CD<sub>2</sub>Cl<sub>2</sub>) δ 7.97 (at, *J* = 7.6, 1.3 Hz, 1H), 7.92 (ad, *J* = 5.8 Hz, 1H), 7.80 (ad, *J* = 8.0 Hz, 1H), 7.41 (at, *J* = 13.1, 6.7 Hz, 1H), 5.24 (as, 2H), 4.76 (dp, *J* = 4.7, 2.2 Hz, 2H), 3.56 (d, *J* = 9.5 Hz, 2H), 2.50 (dm, 4H), 2.38 – 2.30 (m, 2H), 2.19 (tq, *J* = 11.8, 4.0 Hz, 2H), 1.31 (d, *J* = 13.5 Hz, 18H).

<sup>13</sup>C NMR (151 MHz, CD<sub>2</sub>Cl<sub>2</sub>) δ 164.45 (d, *J* = 5.8 Hz), 149.26, 141.14, 125.19 (d, *J* = 9.2 Hz), 124.28, 122.56 (q, *J* = 321.5 Hz), 120.43 (q, *J* = 321.5 Hz), 102.76 (dd, *J* = 17.0, 8.4 Hz), 76.80 (d, *J* = 11.8 Hz), 36.91 (d, *J* = 14.1 Hz), 34.19 (d, *J* = 19.0 Hz), 32.83 (d, *J* = 2.7 Hz), 30.22 (d, *J* = 4.1 Hz), 28.17.

<sup>31</sup>P NMR (243 MHz, CD<sub>2</sub>Cl<sub>2</sub>) δ 64.97 (d, *J* = 144.3 Hz).

<sup>19</sup>F NMR (564 MHz, CD<sub>2</sub>Cl<sub>2</sub>) δ -78.90 (at, *J* = 321.8, 88.6 Hz).

Elemental Analysis: Calculated: C 46.24%, H 6.07%, N 2.34%, S 5.37%; found C 46.379%, H 5.919%, N 2.468%, S 5.213%

FTIR (KBr, cm<sup>-1</sup>): 2953, 1602, 1479, 1259, 1149, 1031, 833, 781, 636, 516.

MALDI MS for C<sub>22</sub>H<sub>35</sub>NPRh: Calc'd: 448.1640 g/mol; found: *m/z* = 448.568 [M]<sup>+</sup>.

### Characterization Spectra of Complex 2

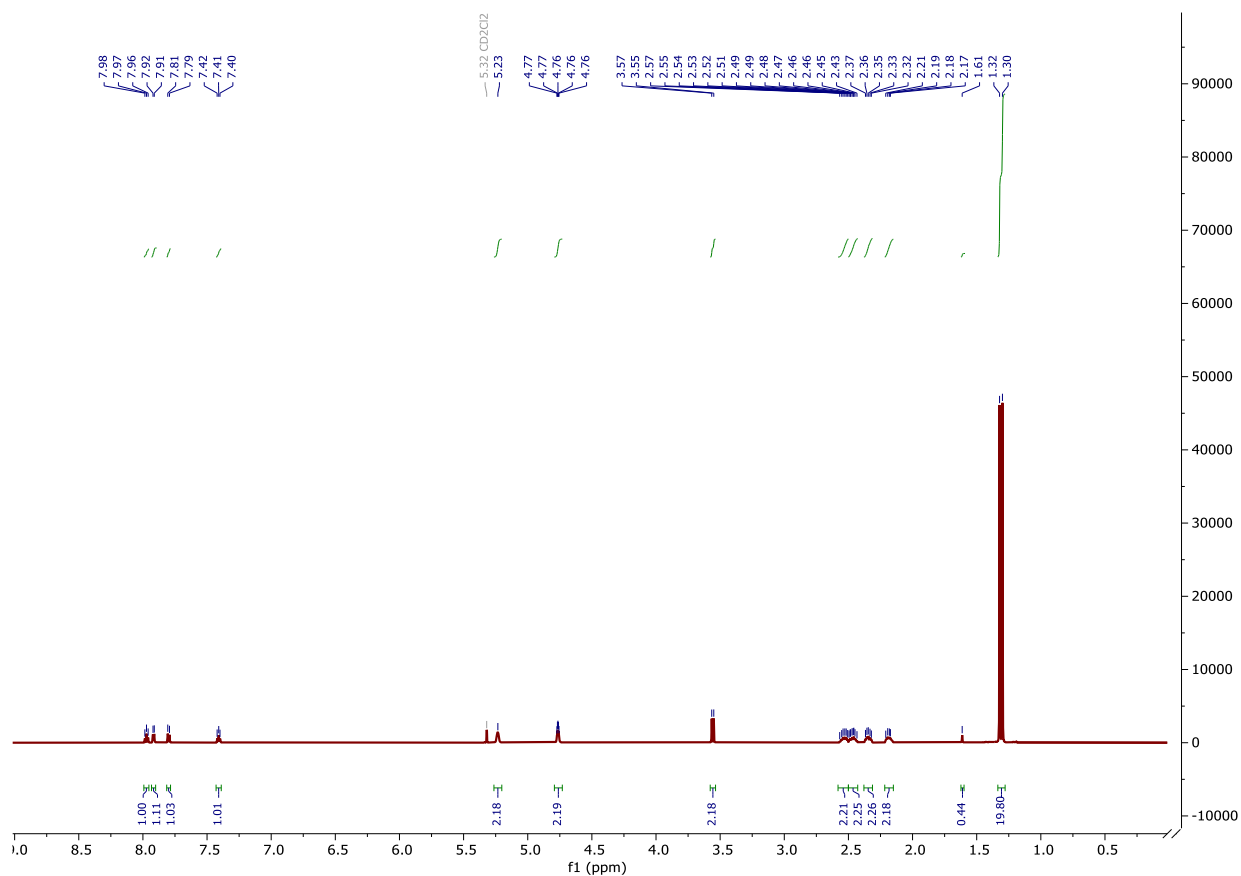

Figure S114: <sup>1</sup>H NMR spectrum of complex 2 in dichloromethane-*d*<sub>2</sub>.

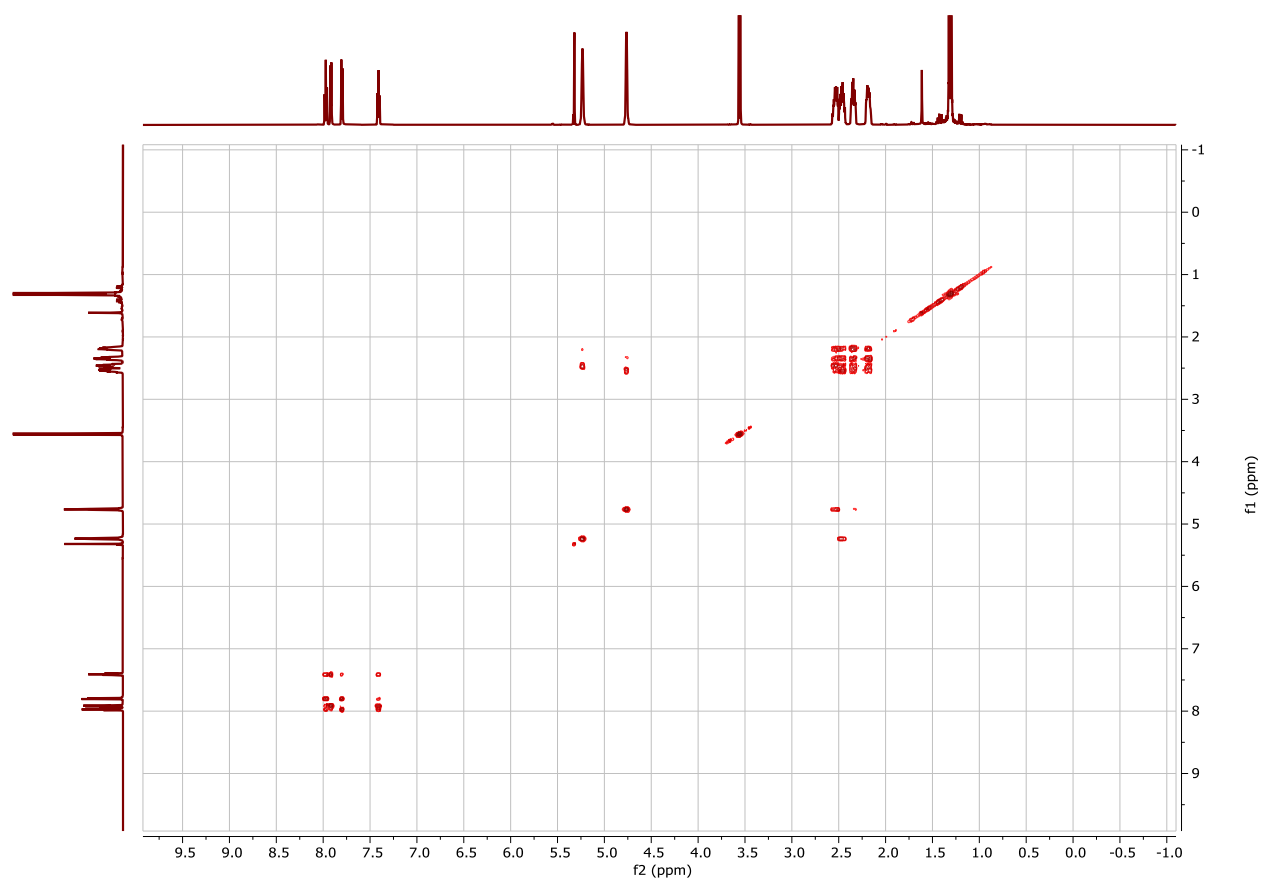

Figure S115: <sup>1</sup>H-<sup>1</sup>H COSY spectrum of complex 2 in dichloromethane-*d*<sub>2</sub>.

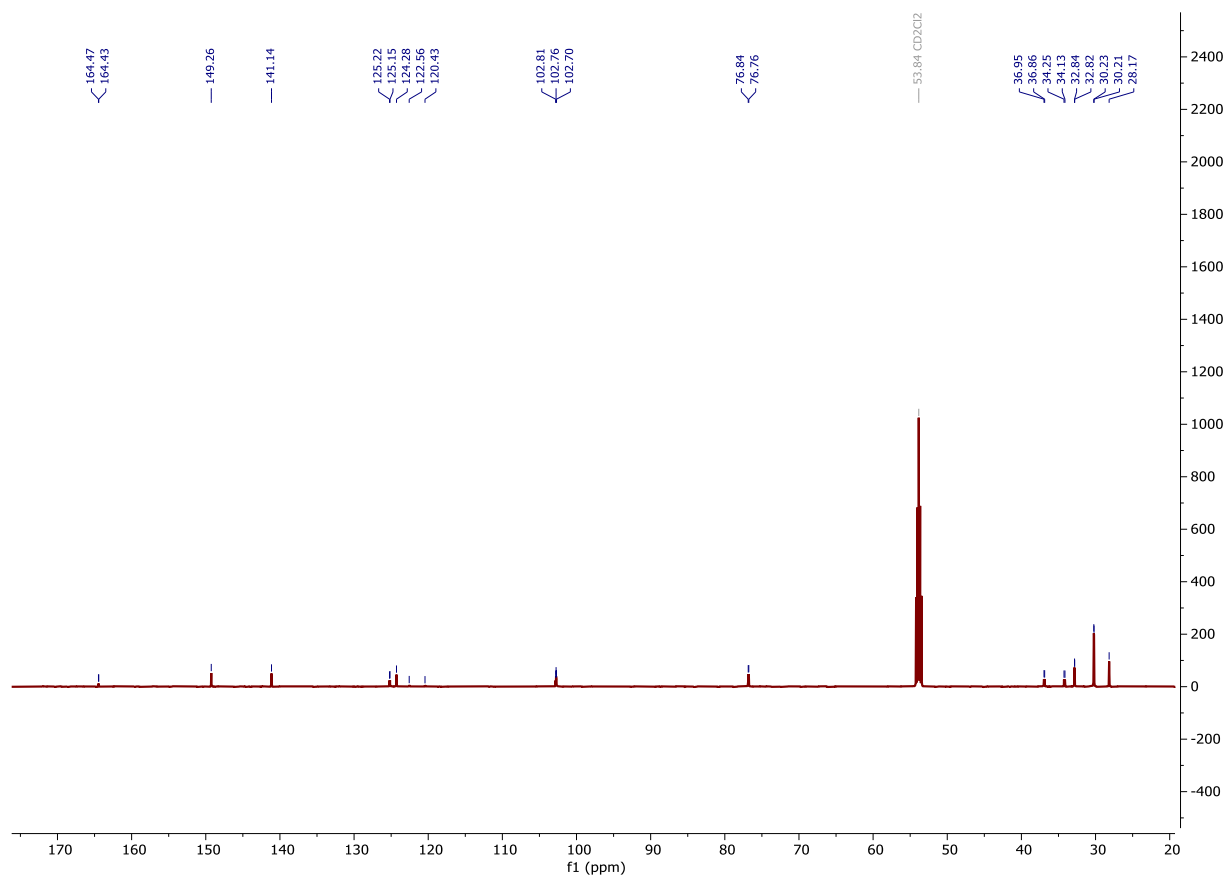

Figure S116:  $^{13}\text{C}$  NMR spectrum of complex 2 in dichloromethane- $d_2$ .

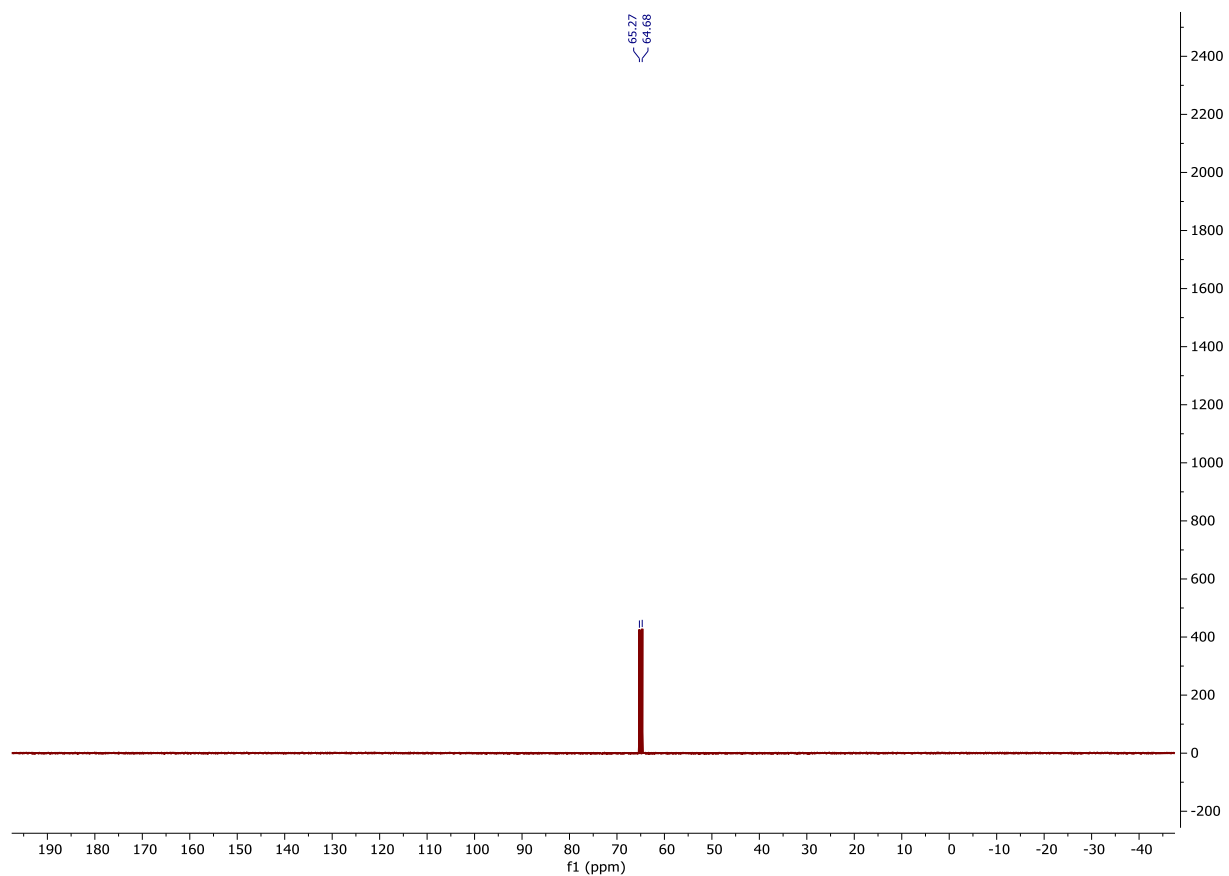

Figure S117:  $^{31}\text{P}$  NMR spectrum of complex 2 in dichloromethane- $d_2$ .

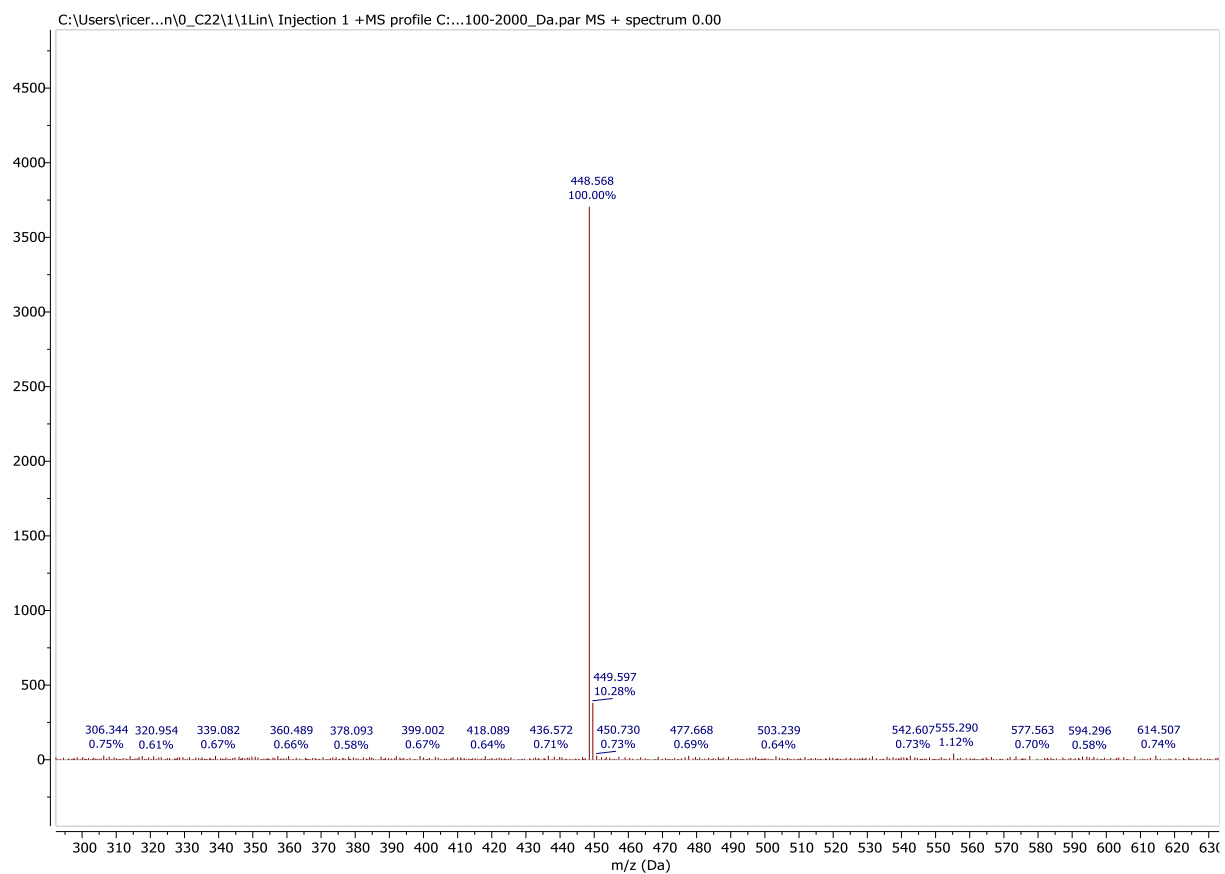

Figure S118: MALDI MS [M<sup>+</sup>] spectrum of complex 2.

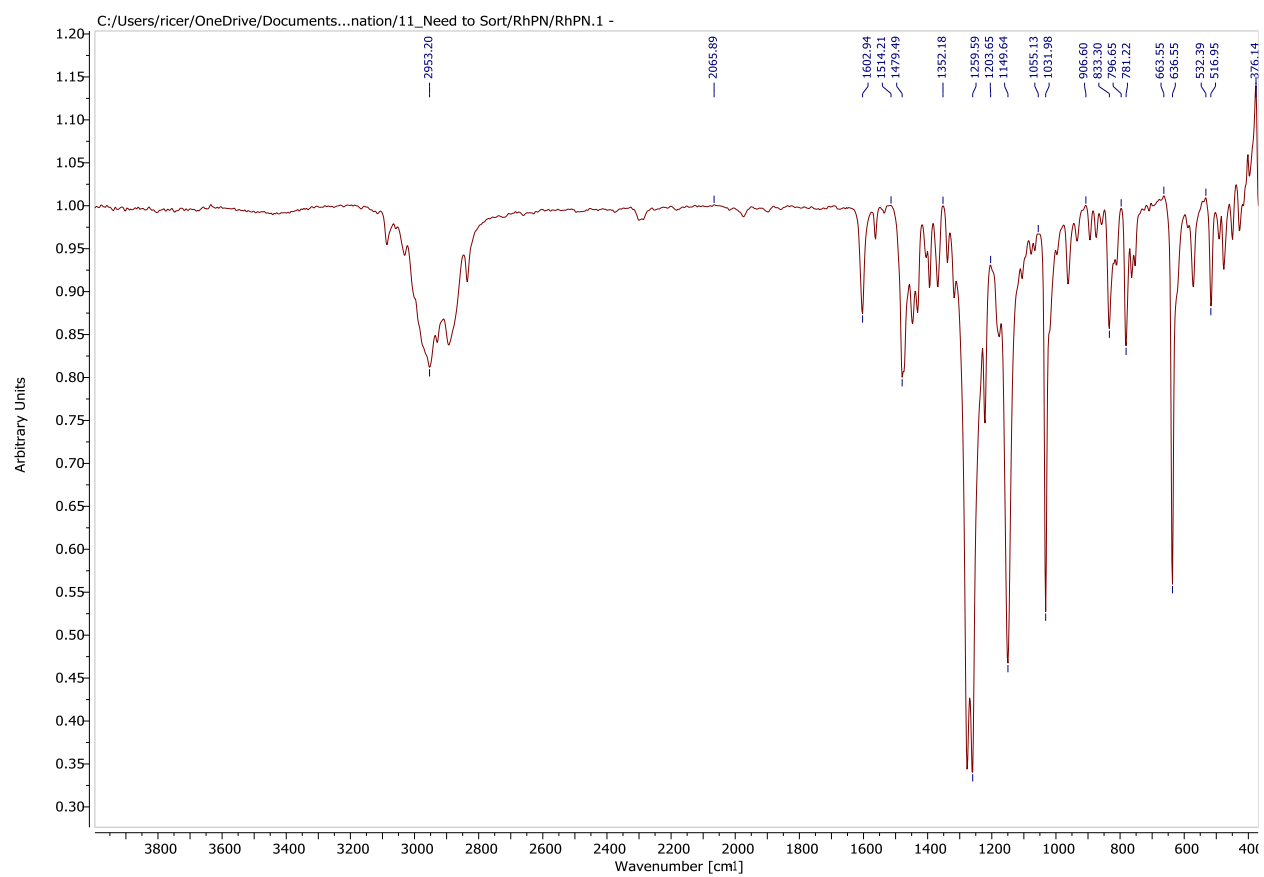

Figure S119: FTIR spectrum of complex 2.

### Preparative procedure for complex 4

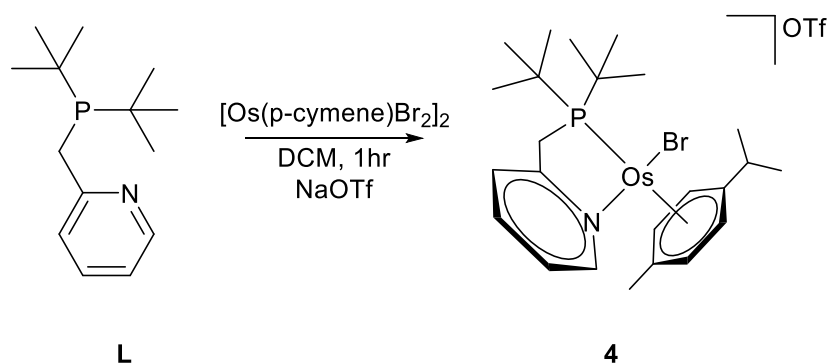

The (pyridyl)phosphine-ligand was synthesized using previously reported methods from our lab.<sup>1</sup> The ligand (98 mg, 0.41 mmol) was diluted in dichloromethane (2 mL, dried by JC Meyer solvent purification system) in a 25 mL Schlenk flask and in a vial 0.5 equivalents of p-cymene osmium bromide dimer (200 mg, .207 mmol) was suspended with one equivalent of sodium triflate (142 mg, 0.826 mmol) in dichloromethane (5 mL, dried by JC Meyer solvent purification system). The ligand was added slowly dropwise to the dimer and triflate. This was allowed to stir for one hour after which the solution was evacuated to dryness, filtered, and recrystallized from dichloromethane and hexanes giving vibrant orange crystals (290 mg, 89% yield).

m. p. 215.5-239.7 °C (decomposition)

<sup>1</sup>H NMR (500 MHz, CD<sub>2</sub>Cl<sub>2</sub>) δ 9.17 (d, *J* = 6.0 Hz, 1H), 7.84 (t, *J* = 7.7 Hz, 1H), 7.61 (d, *J* = 7.8 Hz, 1H), 7.34 (t, *J* = 6.8 Hz, 1H), 6.35 (d, *J* = 6.2 Hz, 1H), 6.29 (t, *J* = 5.0 Hz, 2H), 6.01 (d, *J* = 5.6 Hz, 1H), 3.90 – 3.76 (m, 2H), 2.85 (hept, *J* = 7.0 Hz, 1H), 2.27 (s, 3H), 1.53 (d, *J* = 14.4 Hz, 10H), 1.34 (dd, *J* = 15.7, 6.9 Hz, 7H), 1.18 (d, *J* = 13.3 Hz, 10H).

<sup>13</sup>C NMR (151 MHz, CD<sub>2</sub>Cl<sub>2</sub>) δ 159.50, 140.57, 126.08, 124.22, 89.05, 85.48, 79.93, 77.06, 36.73, 36.56, 31.54, 31.53, 30.11, 30.09, 30.04, 24.47, 22.02, 18.17.

<sup>31</sup>P NMR (202 MHz, CD<sub>2</sub>Cl<sub>2</sub>) δ 44.36.

<sup>19</sup>F NMR (564 MHz, CD<sub>2</sub>Cl<sub>2</sub>) δ -78.79.

Elemental Analysis: Calculated: C 37.97%, H 4.84%, N 1.77%, S 4.05%; Found: C 38.065%, H 4.755%, N 1.772%, S 3.949%.

MALDI MS for C<sub>24</sub>H<sub>38</sub>BrNO<sub>5</sub>P: calc'd 642.1540 g/mol; found *m/z* = 642.384 [M]<sup>+</sup>.

FTIR (KBr, cm<sup>-1</sup>): 2968, 1608, 1471, 1276, 1221, 1147, 1030, 835, 636, 516.

### Characterization Spectra of Complex 4

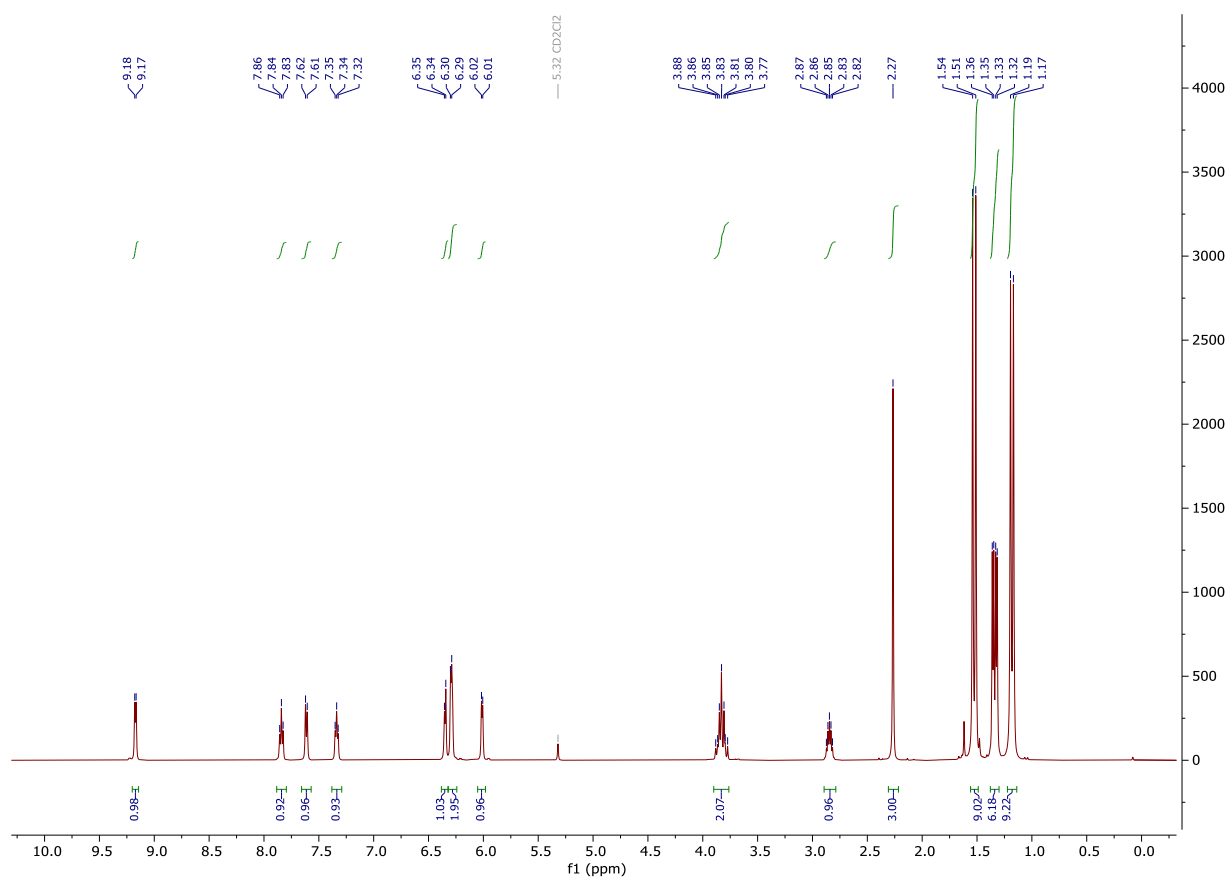

Figure S120: <sup>1</sup>H NMR spectrum of complex 4 in *d*<sub>2</sub>-methylene chloride.

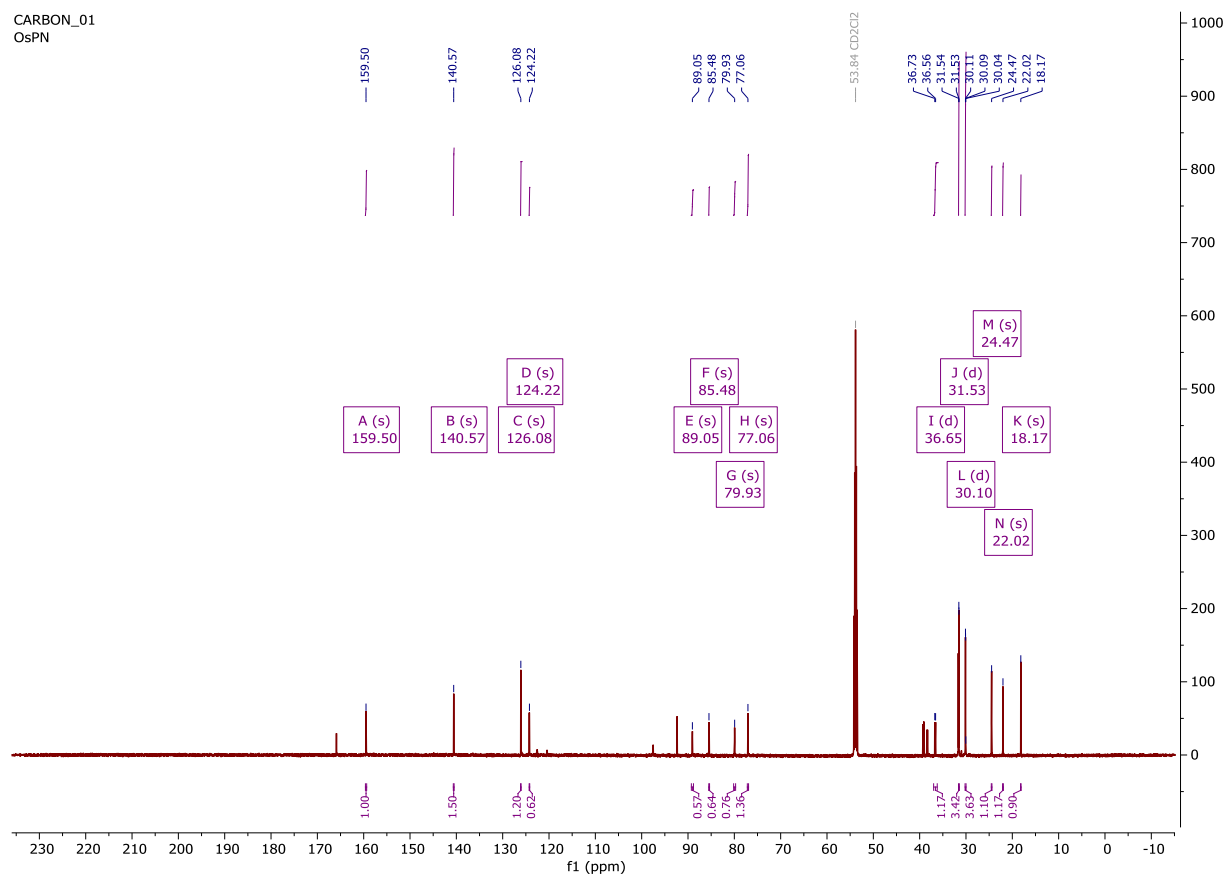

Figure S121: <sup>13</sup>C NMR spectrum of complex 4 in *d*<sub>2</sub>-methylene chloride.



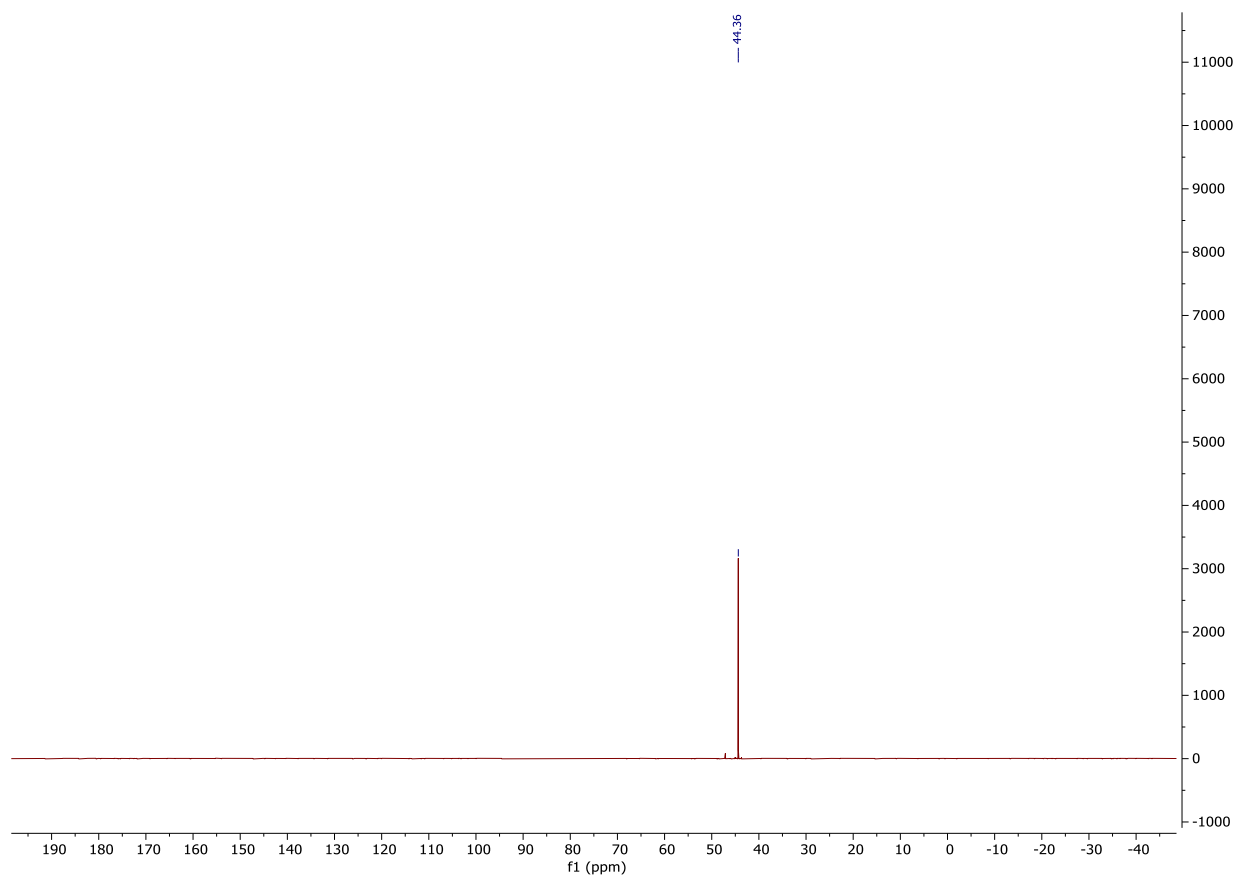

Figure S122:  $^{31}\text{P}$  NMR spectrum of complex 4 in  $d_2$ -methylene chloride.

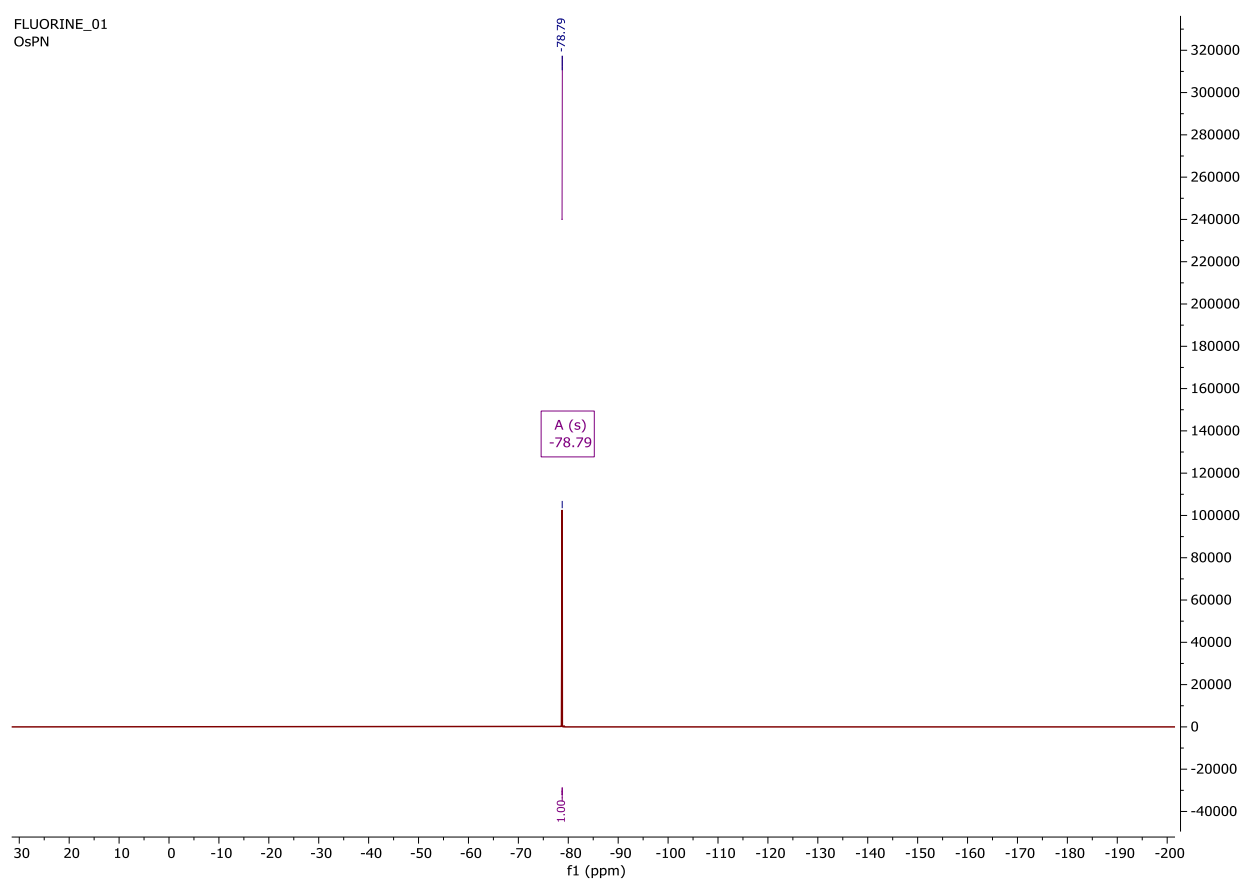

Figure S123:  $^{19}\text{F}$  NMR spectrum of complex 4 in methylene chloride- $d_2$ .

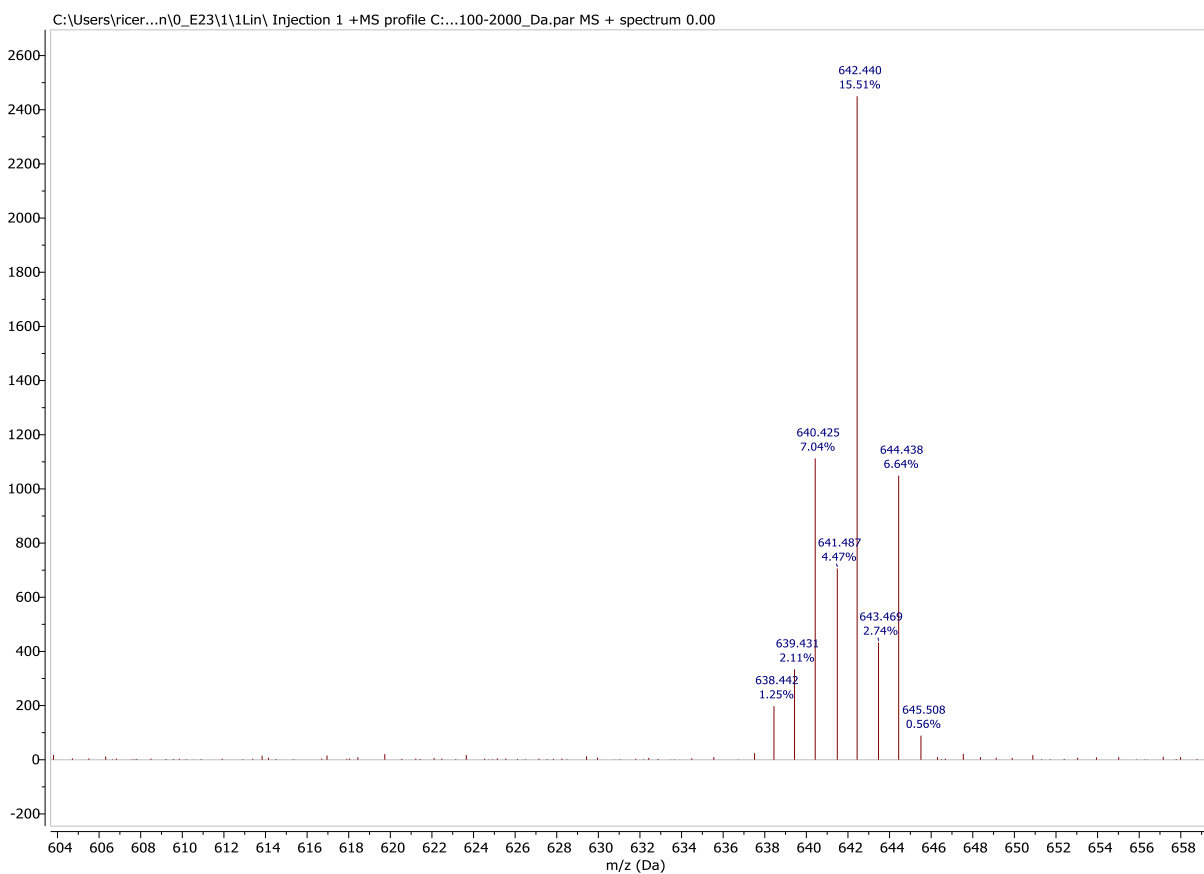

Figure S124: MALDI [M<sup>+</sup>] spectrum of complex 4.

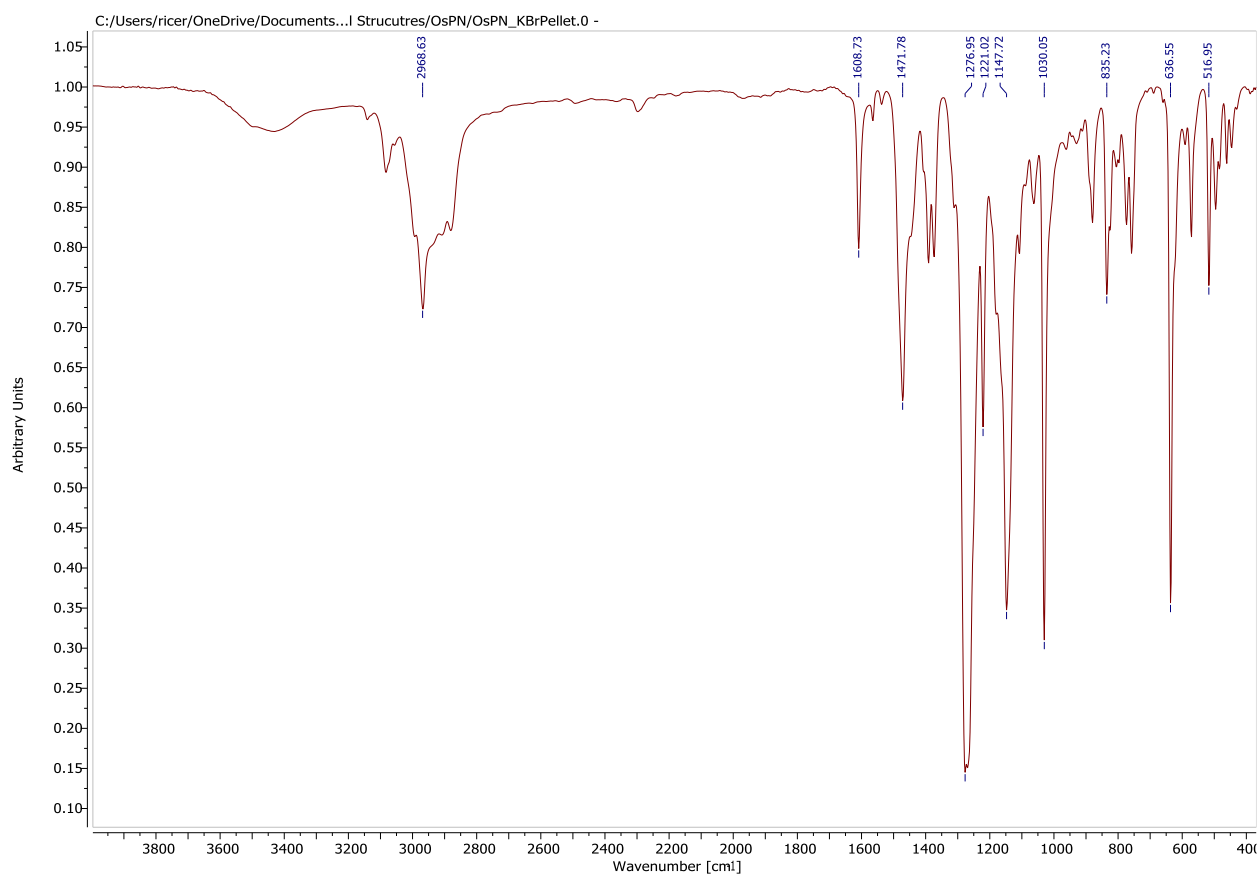

Figure S125: FTIR spectrum of complex 4.

### Crystal Structure of 5

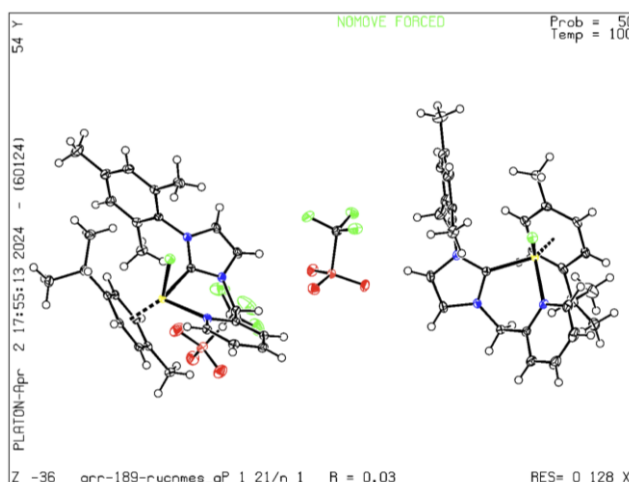

**Figure S126:** Molecular structure of **5** shown with 50% probability ellipsoids.

A clear yellowish prism-like crystal of  $C_{58}H_{66}Cl_2F_6N_6O_6Ru_2S_2$ , approximate dimensions 0.471 mm x 0.16 mm x 0.139 mm was used for X-ray crystallographic analysis grown from slow diffusion of hexanes and dichloromethane. The X-ray intensity data was collected on a XtaLAB Synergy, Dualflex, HyPix diffractometer using a Mo  $K\alpha$  fine-focus tube ( $\lambda = 0.71073$ ) and kept at 100.00(10) K during data acquisition. The crystal was mounted on a MiTiGen 50um.

A total of 1248 frames were collected; the total exposure time was 3 hours and 37 minutes. The frames were integrated using Rigaku CrysAlisPro software. The integration of the data using a monoclinic crystal system resulted in 134659 reflections to a maximum  $\theta$  angle of  $32.472^\circ$  (0.75 Å resolution), of which 18833 were independent (completeness = 88.5 %,  $R_{int} = 0.0493$ ,  $R_{\sigma} = 0.0326$ ) and used in all calculations. The final cell constants are  $a = 14.4987(2)$  Å,  $b = 13.8436(2)$  Å,  $c = 29.3646(3)$  Å,  $\beta = 90.5070(10)^\circ$ ,  $\gamma = \alpha = 90^\circ$ , volume =  $5893.66(13)$  Å<sup>3</sup>, are based upon the refinement. Data was corrected for absorption effects using the multi-scan method. The ratio of minimum to maximum apparent transmission was 0.64389.

The structure was solved using olex2.solve<sup>4</sup> structure solution program using Charge Flipping, and refined with the SHELXL<sup>5</sup> refinement package using Least Squares minimization. The space group  $P2_1/n$  was used with  $Z = 4$  for the formula unit,  $C_{58}H_{66}Cl_2F_6N_6O_6Ru_2S_2$ . The final  $R_1 = 2.70\%$  and  $wR_2 = 6.01\%$  ( $I > 2\sigma(I)$ ) while for all data  $R_1 = 3.65\%$  and  $wR_2 = 6.35\%$ . The goodness-of-fit was 1.038. The largest peak in the final difference electron density synthesis was  $1.16 e/\text{Å}^3$  and the largest hole was  $-0.73 e/\text{Å}^3$ . On the basis of the final model, the calculated density was  $1.571 \text{ g/cm}^3$  and  $F(000)$ , 2848.0.

**Table S11: Crystal data and structure refinement for Ruthenium CN-Mesityl.**

|                                               |                                                                    |
|-----------------------------------------------|--------------------------------------------------------------------|
| Identification code                           | Ruthenium CN-Mesityl                                               |
| Empirical formula                             | $C_{58}H_{66}Cl_2F_6N_6O_6Ru_2S_2$                                 |
| Formula weight                                | 1394.32                                                            |
| Temperature/K                                 | 100.00(10)                                                         |
| Crystal system                                | monoclinic                                                         |
| Space group                                   | $P2_1/n$                                                           |
| $a/\text{Å}$                                  | 14.4987(2)                                                         |
| $b/\text{Å}$                                  | 13.8436(2)                                                         |
| $c/\text{Å}$                                  | 29.3646(3)                                                         |
| $\alpha/^\circ$                               | 90                                                                 |
| $\beta/^\circ$                                | 90.5070(10)                                                        |
| $\gamma/^\circ$                               | 90                                                                 |
| Volume/Å <sup>3</sup>                         | 5893.66(13)                                                        |
| Z                                             | 4                                                                  |
| $\rho_{calc}/\text{cm}^3$                     | 1.571                                                              |
| $\mu/\text{mm}^{-1}$                          | 0.749                                                              |
| $F(000)$                                      | 2848.0                                                             |
| Crystal size/ $\text{mm}^3$                   | $0.471 \times 0.16 \times 0.139$                                   |
| Radiation                                     | Mo $K\alpha$ ( $\lambda = 0.71073$ )                               |
| $2\theta$ range for data collection/ $^\circ$ | 4.29 to 64.944                                                     |
| Index ranges                                  | $-18 \leq h \leq 21$ , $-20 \leq k \leq 20$ , $-43 \leq l \leq 42$ |
| Reflections collected                         | 134659                                                             |
| Independent reflections                       | 18833 [ $R_{int} = 0.0493$ , $R_{\sigma} = 0.0326$ ]               |
| Data/restraints/parameters                    | 18833/0/751                                                        |
| Goodness-of-fit on $F^2$                      | 1.038                                                              |
| Final R indexes [ $I > 2\sigma(I)$ ]          | $R_1 = 0.0270$ , $wR_2 = 0.0601$                                   |
| Final R indexes [all data]                    | $R_1 = 0.0365$ , $wR_2 = 0.0635$                                   |
| Largest diff. peak/hole / $e \text{ Å}^{-3}$  | 1.16/-0.73                                                         |

**Table S12: Fractional Atomic Coordinates ( $\times 10^4$ ) and Equivalent Isotropic Displacement Parameters ( $\text{\AA}^2 \times 10^3$ ) for Ruthenium CN-Mesityl.  $U_{\text{eq}}$  is defined as 1/3 of the trace of the orthogonalised  $U_{ij}$  tensor.**

| Atom | x          | y           | z         | U(eq)    |
|------|------------|-------------|-----------|----------|
| Ru1  | 2978.9(2)  | -989.8(2)   | 3259.3(2) | 9.23(3)  |
| Cl1  | 4454.7(2)  | -1525.9(3)  | 3541.3(2) | 15.31(7) |
| N1   | 3796.5(8)  | 2.9(9)      | 2887.7(4) | 11.8(2)  |
| N2   | 3082.9(8)  | 984.6(9)    | 3682.1(4) | 12.2(2)  |
| N3   | 2937.3(8)  | -4.8(9)     | 4237.2(4) | 12.2(2)  |
| C1   | 4379.4(10) | -1034.0(12) | 4724.5(6) | 20.2(3)  |
| C2   | 3374.3(10) | -1259.2(11) | 4787.2(5) | 14.9(3)  |
| C3   | 3100.9(11) | -1951.0(11) | 5102.4(5) | 18.1(3)  |
| C4   | 2178.1(11) | -2170.9(12) | 5175.4(5) | 19.3(3)  |
| C5   | 1902.0(13) | -2920.0(14) | 5522.0(6) | 29.5(4)  |
| C6   | 1512.6(10) | -1667.5(12) | 4926.7(5) | 18.3(3)  |
| C7   | 1748.6(10) | -963.6(11)  | 4607.2(5) | 14.5(3)  |
| C8   | 991.4(10)  | -409.8(12)  | 4366.4(5) | 17.2(3)  |
| C9   | 2684.8(9)  | -789.9(10)  | 4533.1(5) | 12.2(2)  |
| C10  | 3027.6(10) | 918.7(11)   | 4421.8(5) | 15.7(3)  |
| C11  | 3117.9(10) | 1540.8(11)  | 4073.9(5) | 15.5(3)  |
| C12  | 2976.6(9)  | 29.0(10)    | 3772.1(5) | 10.9(2)  |
| C13  | 3047.0(10) | 1405.8(10)  | 3227.3(5) | 13.7(3)  |
| C14  | 3746.9(9)  | 973.8(10)   | 2912.5(5) | 12.3(2)  |
| C15  | 4291.5(10) | 1573.9(11)  | 2645.6(5) | 14.4(3)  |
| C16  | 4889.4(10) | 1165.7(11)  | 2332.5(5) | 16.6(3)  |
| C17  | 4941.3(10) | 167.3(11)   | 2306.9(5) | 16.0(3)  |
| C18  | 4397.6(9)  | -389.7(11)  | 2589.2(5) | 14.0(3)  |
| C19  | 1522.8(11) | -14.1(11)   | 2495.1(5) | 18.1(3)  |
| C20  | 1812.9(9)  | -873.0(10)  | 2775.5(5) | 13.5(3)  |
| C21  | 2456.6(10) | -1558.1(11) | 2596.1(5) | 14.2(3)  |
| C22  | 2758.0(9)  | -2343.3(10) | 2853.0(5) | 13.0(3)  |
| C23  | 1473.8(9)  | -1033.9(10) | 3218.7(5) | 12.6(3)  |
| C24  | 1768.8(9)  | -1847.5(10) | 3481.0(5) | 12.1(2)  |
| C25  | 2419.2(9)  | -2501.7(10) | 3306.5(5) | 12.6(2)  |
| C26  | 2725.2(10) | -3396.9(10) | 3562.5(5) | 14.6(3)  |
| C27  | 1986.1(11) | -4175.7(11) | 3483.4(6) | 19.4(3)  |
| C28  | 2902.5(11) | -3246.5(12) | 4069.6(5) | 20.3(3)  |
| Ru2  | 7834.7(2)  | 8724.6(2)   | 3634.6(2) | 9.91(3)  |
| Cl2  | 9263.8(2)  | 7840.8(3)   | 3605.0(2) | 16.30(7) |
| N4   | 8004.7(8)  | 8835.2(9)   | 2920.7(4) | 13.0(2)  |
| N5   | 6516.2(8)  | 7480.5(9)   | 3109.4(4) | 12.5(2)  |
| N6   | 6924.5(8)  | 6652.5(9)   | 3691.2(4) | 13.7(2)  |
| C29  | 8579.9(13) | 5380.9(15)  | 5363.4(6) | 29.6(4)  |
| C30  | 8133.3(11) | 5693.8(12)  | 4921.7(5) | 20.1(3)  |
| C31  | 8576.0(11) | 5548.0(11)  | 4509.3(5) | 19.2(3)  |
| C32  | 8186.4(10) | 5833.0(11)  | 4095.9(5) | 15.8(3)  |
| C33  | 8641.5(11) | 5555.5(12)  | 3656.8(5) | 20.6(3)  |
| C34  | 7341.1(10) | 6313.6(11)  | 4109.1(5) | 14.5(3)  |
| C35  | 6843.4(10) | 6420.1(11)  | 4512.3(5) | 16.6(3)  |
| C36  | 5871.1(11) | 6810.9(13)  | 4512.3(6) | 22.0(3)  |
| C37  | 7260.4(11) | 6112.8(12)  | 4916.7(5) | 19.7(3)  |
| C38  | 6247.6(10) | 6126.5(11)  | 3461.6(5) | 18.4(3)  |
| C39  | 5991.8(10) | 6646.1(11)  | 3097.3(5) | 17.6(3)  |
| C40  | 7084.3(9)  | 7508.4(10)  | 3477.7(5) | 11.3(2)  |
| C41  | 6425.7(10) | 8276.3(11)  | 2790.0(5) | 13.9(3)  |
| C42  | 7348.3(10) | 8579.9(10)  | 2614.5(5) | 13.7(3)  |
| C43  | 7509.3(12) | 8600.0(11)  | 2148.6(5) | 19.9(3)  |
| C44  | 8361.6(13) | 8893.7(13)  | 1992.2(6) | 26.8(4)  |
| C45  | 9023.6(12) | 9182.9(13)  | 2305.1(6) | 25.4(3)  |
| C46  | 8826.0(10) | 9146.7(12)  | 2764.3(6) | 18.9(3)  |
| C47  | 8677.2(11) | 8453.7(12)  | 4686.4(5) | 19.2(3)  |
| C48  | 8113.0(10) | 9048.6(11)  | 4360.3(5) | 15.5(3)  |
| C49  | 7165.0(10) | 8869.0(11)  | 4295.5(5) | 16.0(3)  |

**Table S12: Fractional Atomic Coordinates ( $\times 10^4$ ) and Equivalent Isotropic Displacement Parameters ( $\text{\AA}^2 \times 10^3$ ) for Ruthenium CN-Mesityl.  $U_{\text{eq}}$  is defined as 1/3 of the trace of the orthogonalised  $U_{ij}$  tensor.**

| Atom | x          | y           | z         | $U(\text{eq})$ |
|------|------------|-------------|-----------|----------------|
| C50  | 6641.0(10) | 9388.6(11)  | 3961.5(5) | 15.8(3)        |
| C51  | 8525.0(10) | 9805.3(11)  | 4097.0(5) | 15.8(3)        |
| C52  | 8017.8(10) | 10321.5(11) | 3773.3(5) | 15.6(3)        |
| C53  | 7059.3(10) | 10106.5(11) | 3693.2(5) | 15.3(3)        |
| C54  | 6477.5(11) | 10705.5(11) | 3367.3(6) | 20.6(3)        |
| C55  | 6078.3(14) | 11546.4(15) | 3643.7(7) | 36.4(5)        |
| C56  | 6992.2(12) | 11079.9(12) | 2950.6(6) | 26.0(4)        |
| S1   | 69.4(3)    | 1970.1(3)   | 3258.3(2) | 17.07(7)       |
| F1   | 337.6(9)   | 3676.0(9)   | 3620.5(5) | 44.6(3)        |
| F2   | 1501.8(8)  | 2729.2(12)  | 3667.3(5) | 54.5(4)        |
| F3   | 341.9(10)  | 2516.4(11)  | 4102.7(4) | 47.7(3)        |
| O1   | 313.8(10)  | 1014.8(9)   | 3410.8(4) | 32.1(3)        |
| O2   | 497.4(9)   | 2274.9(10)  | 2840.7(4) | 28.7(3)        |
| O3   | -897.7(8)  | 2200.2(10)  | 3286.2(5) | 28.4(3)        |
| C58  | 590.1(12)  | 2764.7(14)  | 3685.3(6) | 26.6(4)        |
| S2   | 4201.6(2)  | 4012.4(3)   | 3731.2(2) | 12.34(6)       |
| F4   | 4890.0(7)  | 2930.2(7)   | 4386.4(3) | 22.8(2)        |
| F5   | 5875.3(6)  | 3909.9(8)   | 4090.6(3) | 25.8(2)        |
| F6   | 4838.2(7)  | 4448.7(8)   | 4546.4(3) | 25.3(2)        |
| O4   | 4440.5(8)  | 4968.9(8)   | 3579.7(4) | 19.4(2)        |
| O5   | 3307.7(7)  | 3908.5(8)   | 3937.8(4) | 19.3(2)        |
| O6   | 4438.4(8)  | 3248.8(8)   | 3417.7(4) | 20.0(2)        |
| C57  | 4990.1(10) | 3818.1(11)  | 4213.1(5) | 16.3(3)        |

**Table S13: Anisotropic Displacement Parameters ( $\text{\AA}^2 \times 10^3$ ) for Ruthenium CN-Mesityl. The Anisotropic displacement factor exponent takes the form:  $-2\pi^2[h^2a^*U_{11}+2hka^*b^*U_{12}+\dots]$ .**

| Atom | $U_{11}$  | $U_{22}$  | $U_{33}$  | $U_{23}$ | $U_{13}$  | $U_{12}$ |
|------|-----------|-----------|-----------|----------|-----------|----------|
| Ru1  | 8.55(5)   | 9.41(5)   | 9.75(5)   | -1.05(4) | 0.66(4)   | -0.75(4) |
| Cl1  | 10.70(14) | 17.46(16) | 17.75(16) | 0.68(12) | -1.04(11) | 1.23(12) |
| N1   | 11.3(5)   | 12.8(5)   | 11.3(5)   | -0.7(4)  | 0.4(4)    | -1.3(4)  |
| N2   | 13.8(5)   | 10.8(5)   | 12.0(5)   | -1.3(4)  | 2.1(4)    | -0.4(4)  |
| N3   | 13.7(5)   | 11.7(5)   | 11.1(5)   | -1.1(4)  | 0.3(4)    | -0.8(4)  |
| C1   | 14.6(7)   | 25.0(8)   | 20.9(7)   | 0.3(6)   | -3.5(5)   | -0.6(6)  |
| C2   | 15.5(6)   | 16.6(7)   | 12.6(6)   | -2.5(5)  | -1.8(5)   | 0.8(5)   |
| C3   | 20.7(7)   | 18.4(7)   | 15.1(7)   | 1.2(5)   | -3.3(5)   | 3.1(6)   |
| C4   | 24.1(7)   | 19.2(7)   | 14.5(7)   | 2.8(6)   | 0.6(6)    | -1.4(6)  |
| C5   | 32.0(9)   | 30.2(9)   | 26.1(9)   | 13.2(7)  | 0.2(7)    | -4.0(7)  |
| C6   | 16.0(7)   | 21.1(7)   | 17.9(7)   | 2.6(6)   | 2.3(5)    | -2.3(6)  |
| C7   | 13.7(6)   | 16.5(7)   | 13.4(6)   | -1.0(5)  | -0.3(5)   | 1.0(5)   |
| C8   | 13.1(6)   | 20.5(7)   | 18.0(7)   | 1.6(6)   | 1.0(5)    | 2.7(5)   |
| C9   | 14.3(6)   | 12.8(6)   | 9.6(6)    | -0.6(5)  | 0.6(5)    | 0.1(5)   |
| C10  | 19.1(7)   | 14.0(7)   | 13.9(6)   | -4.8(5)  | 1.2(5)    | -1.6(5)  |
| C11  | 18.4(7)   | 12.6(6)   | 15.5(7)   | -4.2(5)  | 2.1(5)    | -2.0(5)  |
| C12  | 8.0(5)    | 13.3(6)   | 11.4(6)   | 0.0(5)   | 0.3(4)    | -0.1(5)  |
| C13  | 16.3(6)   | 11.7(6)   | 13.2(6)   | 1.1(5)   | 2.2(5)    | 1.0(5)   |
| C14  | 12.1(6)   | 13.3(6)   | 11.4(6)   | -0.5(5)  | -0.6(5)   | -1.0(5)  |
| C15  | 14.8(6)   | 14.6(6)   | 13.8(6)   | 1.4(5)   | -1.3(5)   | -3.0(5)  |
| C16  | 14.7(6)   | 21.2(7)   | 13.9(6)   | 3.7(5)   | 0.7(5)    | -3.2(5)  |
| C17  | 13.7(6)   | 20.9(7)   | 13.4(6)   | -0.2(5)  | 2.0(5)    | 0.3(5)   |
| C18  | 12.5(6)   | 15.7(7)   | 13.7(6)   | -1.1(5)  | 0.5(5)    | -0.1(5)  |
| C19  | 20.2(7)   | 18.8(7)   | 15.1(7)   | 4.0(6)   | -3.7(5)   | 0.1(6)   |
| C20  | 12.3(6)   | 14.0(6)   | 14.1(6)   | -0.5(5)  | -2.8(5)   | -3.0(5)  |
| C21  | 14.8(6)   | 17.1(7)   | 10.6(6)   | -2.4(5)  | -0.5(5)   | -3.2(5)  |
| C22  | 13.1(6)   | 12.5(6)   | 13.5(6)   | -4.6(5)  | 0.2(5)    | -2.3(5)  |
| C23  | 9.0(6)    | 14.2(6)   | 14.7(6)   | -1.8(5)  | -0.3(5)   | -1.4(5)  |
| C24  | 9.8(6)    | 12.5(6)   | 14.2(6)   | 0.1(5)   | 0.8(5)    | -2.8(5)  |
| C25  | 12.1(6)   | 11.7(6)   | 14.1(6)   | -1.5(5)  | -1.7(5)   | -2.4(5)  |
| C26  | 15.4(6)   | 11.1(6)   | 17.1(7)   | 0.9(5)   | -0.7(5)   | 0.7(5)   |
| C27  | 20.7(7)   | 13.7(7)   | 23.7(8)   | 2.1(6)   | -2.0(6)   | -2.1(6)  |
| C28  | 27.3(8)   | 15.9(7)   | 17.7(7)   | 1.4(6)   | -4.7(6)   | 1.5(6)   |

**Table S13: Anisotropic Displacement Parameters ( $\text{\AA}^2 \times 10^3$ ) for Ruthenium CN-Mesityl. The Anisotropic displacement factor exponent takes the form:  $-2\pi^2[h^2a^*U_{11}+2hka^*b^*U_{12}+\dots]$ .**

| Atom | $U_{11}$  | $U_{22}$  | $U_{33}$  | $U_{23}$  | $U_{13}$ | $U_{12}$  |
|------|-----------|-----------|-----------|-----------|----------|-----------|
| Ru2  | 8.41(5)   | 9.94(5)   | 11.38(5)  | -0.84(4)  | 0.65(4)  | -0.56(4)  |
| Cl2  | 12.03(14) | 16.89(16) | 20.00(16) | -0.69(13) | 1.08(12) | 3.18(12)  |
| N4   | 12.9(5)   | 12.9(6)   | 13.2(5)   | 2.1(4)    | 2.1(4)   | 0.3(4)    |
| N5   | 11.8(5)   | 12.0(5)   | 13.7(5)   | -0.4(4)   | -0.3(4)  | -1.7(4)   |
| N6   | 14.1(5)   | 13.0(6)   | 14.0(5)   | 1.3(4)    | 2.2(4)   | -1.9(4)   |
| C29  | 31.9(9)   | 36.7(10)  | 20.3(8)   | 8.0(7)    | -1.0(7)  | 5.1(8)    |
| C30  | 22.4(7)   | 20.2(7)   | 17.8(7)   | 5.3(6)    | 1.1(6)   | 0.1(6)    |
| C31  | 19.5(7)   | 17.4(7)   | 20.6(7)   | 3.2(6)    | 2.0(6)   | 3.1(6)    |
| C32  | 17.4(7)   | 14.2(7)   | 16.0(7)   | 1.4(5)    | 4.0(5)   | -0.1(5)   |
| C33  | 23.1(7)   | 18.7(7)   | 20.0(7)   | -1.5(6)   | 7.1(6)   | 3.1(6)    |
| C34  | 16.7(6)   | 13.1(6)   | 13.9(6)   | 2.7(5)    | 2.3(5)   | -1.9(5)   |
| C35  | 17.0(7)   | 14.4(7)   | 18.6(7)   | 2.6(5)    | 5.8(5)   | -0.6(5)   |
| C36  | 18.4(7)   | 24.0(8)   | 23.8(8)   | 5.3(6)    | 7.9(6)   | 2.4(6)    |
| C37  | 23.1(7)   | 20.7(8)   | 15.4(7)   | 1.8(6)    | 6.6(6)   | -0.4(6)   |
| C38  | 18.5(7)   | 15.3(7)   | 21.4(7)   | -0.3(6)   | 1.2(6)   | -7.0(5)   |
| C39  | 16.5(7)   | 15.2(7)   | 21.1(7)   | -1.4(6)   | -0.4(5)  | -5.7(5)   |
| C40  | 10.2(6)   | 12.5(6)   | 11.3(6)   | -0.3(5)   | 2.7(5)   | 0.2(5)    |
| C41  | 15.0(6)   | 13.9(6)   | 12.9(6)   | 0.8(5)    | -1.2(5)  | -0.1(5)   |
| C42  | 18.0(7)   | 10.3(6)   | 12.9(6)   | 0.1(5)    | 1.9(5)   | 1.3(5)    |
| C43  | 30.9(8)   | 15.4(7)   | 13.6(7)   | 0.5(5)    | 1.8(6)   | -1.7(6)   |
| C44  | 39.8(10)  | 23.2(8)   | 17.5(8)   | 2.4(6)    | 12.0(7)  | -4.6(7)   |
| C45  | 25.8(8)   | 24.4(8)   | 26.2(8)   | 3.8(7)    | 13.0(7)  | -3.2(6)   |
| C46  | 15.3(7)   | 18.7(7)   | 22.7(7)   | 3.7(6)    | 4.5(6)   | -1.5(5)   |
| C47  | 21.5(7)   | 21.1(8)   | 14.9(7)   | -0.1(6)   | -2.6(5)  | -0.9(6)   |
| C48  | 16.7(7)   | 16.1(7)   | 13.5(6)   | -4.5(5)   | -0.8(5)  | 1.3(5)    |
| C49  | 15.5(6)   | 19.3(7)   | 13.3(6)   | -6.1(5)   | 3.8(5)   | -1.4(5)   |
| C50  | 11.3(6)   | 18.0(7)   | 18.2(7)   | -8.2(6)   | 1.7(5)   | 0.0(5)    |
| C51  | 13.4(6)   | 14.9(7)   | 19.0(7)   | -4.6(5)   | -3.1(5)  | -1.5(5)   |
| C52  | 14.3(6)   | 11.3(6)   | 21.2(7)   | -2.8(5)   | -1.4(5)  | 0.5(5)    |
| C53  | 12.9(6)   | 12.8(6)   | 20.3(7)   | -6.8(5)   | -2.9(5)  | 2.6(5)    |
| C54  | 17.8(7)   | 14.3(7)   | 29.7(8)   | -5.0(6)   | -9.3(6)  | 4.3(5)    |
| C55  | 37.9(10)  | 27.6(10)  | 43.3(11)  | -14.6(8)  | -16.5(9) | 19.2(8)   |
| C56  | 26.4(8)   | 17.0(8)   | 34.4(9)   | 4.8(7)    | -11.3(7) | 0.5(6)    |
| S1   | 17.94(17) | 17.15(17) | 16.13(17) | 2.94(13)  | 0.67(13) | 1.59(13)  |
| F1   | 51.0(8)   | 25.8(6)   | 56.7(8)   | -12.0(6)  | -14.3(6) | 4.4(5)    |
| F2   | 18.4(5)   | 76.6(11)  | 68.3(9)   | -27.0(8)  | -13.4(6) | 4.0(6)    |
| F3   | 62.0(8)   | 60.1(9)   | 20.8(6)   | -7.2(6)   | -2.6(5)  | 7.8(7)    |
| O1   | 48.4(8)   | 20.8(6)   | 27.2(7)   | 5.3(5)    | 2.1(6)   | 10.0(6)   |
| O2   | 35.0(7)   | 30.4(7)   | 21.0(6)   | 4.4(5)    | 8.7(5)   | -0.9(5)   |
| O3   | 15.9(5)   | 32.3(7)   | 37.0(7)   | 4.6(6)    | -2.5(5)  | -1.7(5)   |
| C58  | 21.8(8)   | 30.5(9)   | 27.5(9)   | -5.4(7)   | -3.6(6)  | 6.0(7)    |
| S2   | 11.89(15) | 11.65(15) | 13.48(15) | 1.16(12)  | 0.76(12) | -0.40(11) |
| F4   | 26.4(5)   | 21.5(5)   | 20.5(5)   | 8.8(4)    | -0.7(4)  | 2.7(4)    |
| F5   | 12.7(4)   | 43.5(6)   | 21.3(5)   | 5.9(4)    | 0.3(3)   | -1.6(4)   |
| F6   | 31.9(5)   | 28.1(5)   | 15.9(4)   | -5.9(4)   | -0.1(4)  | -2.8(4)   |
| O4   | 20.7(5)   | 14.8(5)   | 22.8(6)   | 5.6(4)    | -1.4(4)  | -3.5(4)   |
| O5   | 12.4(5)   | 21.3(6)   | 24.4(6)   | 3.8(4)    | 3.8(4)   | 0.2(4)    |
| O6   | 23.1(5)   | 19.6(6)   | 17.3(5)   | -4.3(4)   | 0.3(4)   | 1.4(4)    |
| C57  | 15.7(7)   | 19.0(7)   | 14.2(6)   | 2.1(5)    | 2.4(5)   | -0.3(5)   |

**Table S14: Bond Lengths for Ruthenium CN-Mesityl.**

| Atom Atom | Length/ $\text{\AA}$ | Atom Atom | Length/ $\text{\AA}$ |
|-----------|----------------------|-----------|----------------------|
| Ru1 Cl1   | 2.4048(3)            | Ru2 C52   | 2.2631(15)           |
| Ru1 N1    | 2.1230(12)           | Ru2 C53   | 2.2264(14)           |
| Ru1 C12   | 2.0632(14)           | N4 C42    | 1.3505(19)           |
| Ru1 C20   | 2.2044(14)           | N4 C46    | 1.3508(18)           |
| Ru1 C21   | 2.2268(14)           | N5 C39    | 1.3832(18)           |
| Ru1 C22   | 2.2429(14)           | N5 C40    | 1.3542(18)           |
| Ru1 C23   | 2.1852(13)           | N5 C41    | 1.4520(18)           |
| Ru1 C24   | 2.2208(13)           | N6 C34    | 1.4415(19)           |
| Ru1 C25   | 2.2495(14)           | N6 C38    | 1.3914(19)           |

**Table S14: Bond Lengths for Ruthenium CN-Mesityl.**

| Atom | Atom | Length/Å   | Atom | Atom | Length/Å   |
|------|------|------------|------|------|------------|
| N1   | C14  | 1.3480(18) | N6   | C40  | 1.3613(18) |
| N1   | C18  | 1.3553(18) | C29  | C30  | 1.508(2)   |
| N2   | C11  | 1.3848(18) | C30  | C31  | 1.390(2)   |
| N2   | C12  | 1.3581(18) | C30  | C37  | 1.392(2)   |
| N2   | C13  | 1.4577(18) | C31  | C32  | 1.392(2)   |
| N3   | C9   | 1.4408(18) | C32  | C33  | 1.503(2)   |
| N3   | C10  | 1.3945(18) | C32  | C34  | 1.395(2)   |
| N3   | C12  | 1.3681(18) | C34  | C35  | 1.400(2)   |
| C1   | C2   | 1.503(2)   | C35  | C36  | 1.510(2)   |
| C2   | C3   | 1.392(2)   | C35  | C37  | 1.394(2)   |
| C2   | C9   | 1.402(2)   | C38  | C39  | 1.339(2)   |
| C3   | C4   | 1.391(2)   | C41  | C42  | 1.498(2)   |
| C4   | C5   | 1.510(2)   | C42  | C43  | 1.390(2)   |
| C4   | C6   | 1.392(2)   | C43  | C44  | 1.383(2)   |
| C6   | C7   | 1.397(2)   | C44  | C45  | 1.382(3)   |
| C7   | C8   | 1.510(2)   | C45  | C46  | 1.382(2)   |
| C7   | C9   | 1.3974(19) | C47  | C48  | 1.500(2)   |
| C10  | C11  | 1.344(2)   | C48  | C49  | 1.408(2)   |
| C13  | C14  | 1.5030(19) | C48  | C51  | 1.435(2)   |
| C14  | C15  | 1.3924(19) | C49  | C50  | 1.429(2)   |
| C15  | C16  | 1.389(2)   | C50  | C53  | 1.409(2)   |
| C16  | C17  | 1.386(2)   | C51  | C52  | 1.394(2)   |
| C17  | C18  | 1.384(2)   | C52  | C53  | 1.438(2)   |
| C19  | C20  | 1.504(2)   | C53  | C54  | 1.517(2)   |
| C20  | C21  | 1.434(2)   | C54  | C55  | 1.535(2)   |
| C20  | C23  | 1.413(2)   | C54  | C56  | 1.530(3)   |
| C21  | C22  | 1.391(2)   | S1   | O1   | 1.4395(13) |
| C22  | C25  | 1.4403(19) | S1   | O2   | 1.4425(12) |
| C23  | C24  | 1.428(2)   | S1   | O3   | 1.4409(12) |
| C24  | C25  | 1.4074(19) | S1   | C58  | 1.8263(18) |
| C25  | C26  | 1.514(2)   | F1   | C58  | 1.327(2)   |
| C26  | C27  | 1.536(2)   | F2   | C58  | 1.324(2)   |
| C26  | C28  | 1.523(2)   | F3   | C58  | 1.326(2)   |
| Ru2  | Cl2  | 2.4085(3)  | S2   | O4   | 1.4403(11) |
| Ru2  | N4   | 2.1185(12) | S2   | O5   | 1.4430(11) |
| Ru2  | C40  | 2.0547(14) | S2   | O6   | 1.4450(11) |
| Ru2  | C48  | 2.2114(14) | S2   | C57  | 1.8313(15) |
| Ru2  | C49  | 2.1868(14) | F4   | C57  | 1.3387(18) |
| Ru2  | C50  | 2.1888(14) | F5   | C57  | 1.3420(17) |
| Ru2  | C51  | 2.2493(14) | F6   | C57  | 1.3312(18) |

**Table S15: Bond Angles for Ruthenium CN-Mesityl.**

| Atom | Atom | Atom | Angle/°   | Atom | Atom | Atom | Angle/°   |
|------|------|------|-----------|------|------|------|-----------|
| N1   | Ru1  | Cl1  | 82.97(3)  | C40  | Ru2  | C51  | 155.82(5) |
| N1   | Ru1  | C20  | 92.85(5)  | C40  | Ru2  | C52  | 154.40(5) |
| N1   | Ru1  | C21  | 88.07(5)  | C40  | Ru2  | C53  | 117.05(5) |
| N1   | Ru1  | C22  | 110.19(5) | C48  | Ru2  | Cl2  | 89.32(4)  |
| N1   | Ru1  | C23  | 123.49(5) | C48  | Ru2  | C51  | 37.53(6)  |
| N1   | Ru1  | C24  | 160.54(5) | C48  | Ru2  | C52  | 66.94(6)  |
| N1   | Ru1  | C25  | 146.85(5) | C48  | Ru2  | C53  | 80.74(5)  |
| C12  | Ru1  | Cl1  | 88.10(4)  | C49  | Ru2  | Cl2  | 117.86(4) |
| C12  | Ru1  | N1   | 86.40(5)  | C49  | Ru2  | C48  | 37.34(5)  |
| C12  | Ru1  | C20  | 114.46(5) | C49  | Ru2  | C50  | 38.14(6)  |
| C12  | Ru1  | C21  | 151.29(5) | C49  | Ru2  | C51  | 66.56(5)  |
| C12  | Ru1  | C22  | 163.38(5) | C49  | Ru2  | C52  | 78.66(6)  |
| C12  | Ru1  | C23  | 92.92(5)  | C49  | Ru2  | C53  | 67.94(6)  |
| C12  | Ru1  | C24  | 98.35(5)  | C50  | Ru2  | Cl2  | 155.92(4) |
| C12  | Ru1  | C25  | 126.03(5) | C50  | Ru2  | C48  | 68.32(5)  |
| C20  | Ru1  | Cl1  | 156.84(4) | C50  | Ru2  | C51  | 78.77(5)  |
| C20  | Ru1  | C21  | 37.76(5)  | C50  | Ru2  | C52  | 66.60(5)  |
| C20  | Ru1  | C22  | 67.26(5)  | C50  | Ru2  | C53  | 37.20(6)  |

**Table S15: Bond Angles for Ruthenium CN-Mesityl.**

| Atom Atom Atom | Angle/°    | Atom Atom Atom | Angle/°    |
|----------------|------------|----------------|------------|
| C20 Ru1 C24    | 67.97(5)   | C51 Ru2 Cl2    | 88.93(4)   |
| C20 Ru1 C25    | 80.39(5)   | C51 Ru2 C52    | 35.98(5)   |
| C21 Ru1 Cl1    | 119.12(4)  | C52 Ru2 Cl2    | 113.77(4)  |
| C21 Ru1 C22    | 36.27(5)   | C53 Ru2 Cl2    | 150.98(4)  |
| C21 Ru1 C25    | 66.74(5)   | C53 Ru2 C51    | 66.68(5)   |
| C22 Ru1 Cl1    | 92.74(4)   | C53 Ru2 C52    | 37.36(5)   |
| C22 Ru1 C25    | 37.40(5)   | C42 N4 Ru2     | 123.54(9)  |
| C23 Ru1 Cl1    | 153.54(4)  | C42 N4 C46     | 118.37(13) |
| C23 Ru1 C20    | 37.55(5)   | C46 N4 Ru2     | 118.05(10) |
| C23 Ru1 C21    | 67.09(5)   | C39 N5 C41     | 124.78(12) |
| C23 Ru1 C22    | 79.03(5)   | C40 N5 C39     | 112.01(12) |
| C23 Ru1 C24    | 37.81(5)   | C40 N5 C41     | 123.03(12) |
| C23 Ru1 C25    | 67.47(5)   | C38 N6 C34     | 122.05(12) |
| C24 Ru1 Cl1    | 115.91(4)  | C40 N6 C34     | 127.12(12) |
| C24 Ru1 C21    | 78.70(5)   | C40 N6 C38     | 110.77(12) |
| C24 Ru1 C22    | 66.41(5)   | C31 C30 C29    | 120.62(15) |
| C24 Ru1 C25    | 36.69(5)   | C31 C30 C37    | 118.55(14) |
| C25 Ru1 Cl1    | 90.69(4)   | C37 C30 C29    | 120.81(15) |
| C14 N1 Ru1     | 125.97(9)  | C30 C31 C32    | 122.12(14) |
| C14 N1 C18     | 118.01(12) | C31 C32 C33    | 119.86(14) |
| C18 N1 Ru1     | 115.98(10) | C31 C32 C34    | 117.44(14) |
| C11 N2 C13     | 122.64(12) | C34 C32 C33    | 122.54(14) |
| C12 N2 C11     | 112.54(12) | C32 C34 N6     | 119.54(13) |
| C12 N2 C13     | 124.38(12) | C32 C34 C35    | 122.22(14) |
| C10 N3 C9      | 118.72(12) | C35 C34 N6     | 118.07(13) |
| C12 N3 C9      | 129.86(12) | C34 C35 C36    | 121.73(14) |
| C12 N3 C10     | 110.62(12) | C37 C35 C34    | 117.73(14) |
| C3 C2 C1       | 120.42(13) | C37 C35 C36    | 120.48(13) |
| C3 C2 C9       | 117.83(13) | C30 C37 C35    | 121.57(14) |
| C9 C2 C1       | 121.76(14) | C39 C38 N6     | 107.18(13) |
| C4 C3 C2       | 122.22(14) | C38 C39 N5     | 106.24(13) |
| C3 C4 C5       | 121.04(15) | N5 C40 Ru2     | 121.30(10) |
| C3 C4 C6       | 118.23(14) | N5 C40 N6      | 103.77(12) |
| C6 C4 C5       | 120.72(15) | N6 C40 Ru2     | 134.59(10) |
| C4 C6 C7       | 121.91(14) | N5 C41 C42     | 111.05(12) |
| C6 C7 C8       | 119.15(13) | N4 C42 C41     | 118.06(12) |
| C6 C7 C9       | 117.95(13) | N4 C42 C43     | 121.77(14) |
| C9 C7 C8       | 122.89(13) | C43 C42 C41    | 120.17(13) |
| C2 C9 N3       | 119.13(12) | C44 C43 C42    | 119.41(15) |
| C7 C9 N3       | 118.43(12) | C45 C44 C43    | 118.78(15) |
| C7 C9 C2       | 121.77(13) | C46 C45 C44    | 119.29(15) |
| C11 C10 N3     | 107.54(13) | N4 C46 C45     | 122.31(15) |
| C10 C11 N2     | 105.80(13) | C47 C48 Ru2    | 126.70(10) |
| N2 C12 Ru1     | 121.53(10) | C49 C48 Ru2    | 70.38(8)   |
| N2 C12 N3      | 103.49(12) | C49 C48 C47    | 121.03(14) |
| N3 C12 Ru1     | 134.87(10) | C49 C48 C51    | 117.80(14) |
| N2 C13 C14     | 112.68(12) | C51 C48 Ru2    | 72.67(8)   |
| N1 C14 C13     | 117.81(12) | C51 C48 C47    | 121.16(13) |
| N1 C14 C15     | 122.26(13) | C48 C49 Ru2    | 72.28(8)   |
| C15 C14 C13    | 119.88(13) | C48 C49 C50    | 121.07(14) |
| C16 C15 C14    | 119.35(14) | C50 C49 Ru2    | 71.01(8)   |
| C17 C16 C15    | 118.42(14) | C49 C50 Ru2    | 70.85(8)   |
| C18 C17 C16    | 119.44(14) | C53 C50 Ru2    | 72.85(8)   |
| N1 C18 C17     | 122.49(14) | C53 C50 C49    | 120.65(13) |
| C19 C20 Ru1    | 128.31(10) | C48 C51 Ru2    | 69.80(8)   |
| C21 C20 Ru1    | 71.97(8)   | C52 C51 Ru2    | 72.54(8)   |
| C21 C20 C19    | 120.09(13) | C52 C51 C48    | 121.47(13) |
| C23 C20 Ru1    | 70.49(8)   | C51 C52 Ru2    | 71.47(9)   |
| C23 C20 C19    | 122.07(13) | C51 C52 C53    | 120.56(14) |
| C23 C20 C21    | 117.83(13) | C53 C52 Ru2    | 69.93(8)   |
| C20 C21 Ru1    | 70.27(8)   | C50 C53 Ru2    | 69.95(8)   |
| C22 C21 Ru1    | 72.49(8)   | C50 C53 C52    | 118.34(13) |
| C22 C21 C20    | 121.32(13) | C50 C53 C54    | 119.91(13) |



**Table S15: Bond Angles for Ruthenium CN-Mesityl.**

| Atom Atom Atom | Angle/°    | Atom Atom Atom | Angle/°    |
|----------------|------------|----------------|------------|
| C21 C22 Ru1    | 71.24(8)   | C52 C53 Ru2    | 72.70(8)   |
| C21 C22 C25    | 120.81(13) | C52 C53 C54    | 121.40(14) |
| C25 C22 Ru1    | 71.55(8)   | C54 C53 Ru2    | 134.37(10) |
| C20 C23 Ru1    | 71.96(8)   | C53 C54 C55    | 106.92(14) |
| C20 C23 C24    | 121.08(13) | C53 C54 C56    | 114.68(13) |
| C24 C23 Ru1    | 72.45(8)   | C56 C54 C55    | 110.78(15) |
| C23 C24 Ru1    | 69.74(8)   | O1 S1 O2       | 115.25(8)  |
| C25 C24 Ru1    | 72.76(8)   | O1 S1 O3       | 114.98(8)  |
| C25 C24 C23    | 120.63(13) | O1 S1 C58      | 103.93(8)  |
| C22 C25 Ru1    | 71.05(8)   | O2 S1 C58      | 103.25(8)  |
| C22 C25 C26    | 118.87(12) | O3 S1 O2       | 114.20(8)  |
| C24 C25 Ru1    | 70.55(8)   | O3 S1 C58      | 102.97(8)  |
| C24 C25 C22    | 118.28(13) | F1 C58 S1      | 111.24(12) |
| C24 C25 C26    | 122.71(13) | F2 C58 S1      | 110.91(12) |
| C26 C25 Ru1    | 133.47(10) | F2 C58 F1      | 107.68(17) |
| C25 C26 C27    | 107.36(12) | F2 C58 F3      | 107.86(15) |
| C25 C26 C28    | 114.81(12) | F3 C58 S1      | 111.38(14) |
| C28 C26 C27    | 110.81(13) | F3 C58 F1      | 107.60(15) |
| N4 Ru2 Cl2     | 83.87(3)   | O4 S2 O5       | 116.16(7)  |
| N4 Ru2 C48     | 156.50(5)  | O4 S2 O6       | 114.62(7)  |
| N4 Ru2 C49     | 158.13(5)  | O4 S2 C57      | 102.92(7)  |
| N4 Ru2 C50     | 120.20(5)  | O5 S2 O6       | 114.48(7)  |
| N4 Ru2 C51     | 119.62(5)  | O5 S2 C57      | 102.55(7)  |
| N4 Ru2 C52     | 95.33(5)   | O6 S2 C57      | 103.57(7)  |
| N4 Ru2 C53     | 94.45(5)   | F4 C57 S2      | 111.07(10) |
| C40 Ru2 Cl2    | 91.70(4)   | F4 C57 F5      | 107.22(12) |
| C40 Ru2 N4     | 84.46(5)   | F5 C57 S2      | 111.77(10) |
| C40 Ru2 C48    | 118.30(6)  | F6 C57 S2      | 111.44(10) |
| C40 Ru2 C49    | 92.03(5)   | F6 C57 F4      | 107.68(12) |
| C40 Ru2 C50    | 91.34(5)   | F6 C57 F5      | 107.45(12) |

**Table S16: Torsion Angles for Ruthenium CN-Mesityl.**

| A B C D         | Angle/°     | A B C D         | Angle/°     |
|-----------------|-------------|-----------------|-------------|
| Ru1 N1 C14 C13  | -0.56(18)   | Ru2 C52 C53 C50 | 54.84(12)   |
| Ru1 N1 C14 C15  | -177.99(10) | Ru2 C52 C53 C54 | -131.91(14) |
| Ru1 N1 C18 C17  | 176.62(11)  | Ru2 C53 C54 C55 | 175.57(13)  |
| Ru1 C20 C21 C22 | 53.68(12)   | Ru2 C53 C54 C56 | -61.2(2)    |
| Ru1 C20 C23 C24 | -55.48(12)  | N4 C42 C43 C44  | -0.4(2)     |
| Ru1 C21 C22 C25 | 53.72(12)   | N5 C41 C42 N4   | -56.07(17)  |
| Ru1 C22 C25 C24 | 54.22(11)   | N5 C41 C42 C43  | 124.36(14)  |
| Ru1 C22 C25 C26 | -129.89(12) | N6 C34 C35 C36  | 4.3(2)      |
| Ru1 C23 C24 C25 | -54.15(12)  | N6 C34 C35 C37  | -178.43(14) |
| Ru1 C24 C25 C22 | -54.47(11)  | N6 C38 C39 N5   | 0.05(17)    |
| Ru1 C24 C25 C26 | 129.81(13)  | C29 C30 C31 C32 | -179.61(16) |
| Ru1 C25 C26 C27 | 174.79(11)  | C29 C30 C37 C35 | 178.97(16)  |
| Ru1 C25 C26 C28 | 51.11(18)   | C30 C31 C32 C33 | -172.88(15) |
| N1 C14 C15 C16  | 1.9(2)      | C30 C31 C32 C34 | 2.6(2)      |
| N2 C13 C14 N1   | 49.43(17)   | C31 C30 C37 C35 | -2.6(2)     |
| N2 C13 C14 C15  | -133.07(14) | C31 C32 C34 N6  | 177.90(13)  |
| N3 C10 C11 N2   | -0.12(16)   | C31 C32 C34 C35 | -6.9(2)     |
| C1 C2 C3 C4     | 179.06(15)  | C32 C34 C35 C36 | -170.99(15) |
| C1 C2 C9 N3     | -6.3(2)     | C32 C34 C35 C37 | 6.3(2)      |
| C1 C2 C9 C7     | -176.73(14) | C33 C32 C34 N6  | -6.7(2)     |
| C2 C3 C4 C5     | -179.57(16) | C33 C32 C34 C35 | 168.53(15)  |
| C2 C3 C4 C6     | -0.8(2)     | C34 N6 C38 C39  | 178.44(13)  |
| C3 C2 C9 N3     | 173.93(13)  | C34 N6 C40 Ru2  | -5.9(2)     |
| C3 C2 C9 C7     | 3.5(2)      | C34 N6 C40 N5   | -178.93(13) |
| C3 C4 C6 C7     | 0.6(2)      | C34 C35 C37 C30 | -1.4(2)     |
| C4 C6 C7 C8     | -176.95(15) | C36 C35 C37 C30 | 175.90(15)  |
| C4 C6 C7 C9     | 1.6(2)      | C37 C30 C31 C32 | 1.9(2)      |
| C5 C4 C6 C7     | 179.33(16)  | C38 N6 C34 C32  | 97.11(17)   |

**Table S16: Torsion Angles for Ruthenium CN-Mesityl.**

| A   | B   | C   | D   | Angle/°     | A   | B   | C   | D   | Angle/°     |
|-----|-----|-----|-----|-------------|-----|-----|-----|-----|-------------|
| C6  | C7  | C9  | N3  | -174.22(13) | C38 | N6  | C34 | C35 | -78.33(18)  |
| C6  | C7  | C9  | C2  | -3.7(2)     | C38 | N6  | C40 | Ru2 | 171.32(11)  |
| C8  | C7  | C9  | N3  | 4.3(2)      | C38 | N6  | C40 | N5  | -1.74(15)   |
| C8  | C7  | C9  | C2  | 174.80(14)  | C39 | N5  | C40 | Ru2 | -172.42(10) |
| C9  | N3  | C10 | C11 | -170.33(12) | C39 | N5  | C40 | N6  | 1.80(15)    |
| C9  | N3  | C12 | Ru1 | -15.0(2)    | C39 | N5  | C41 | C42 | -131.99(14) |
| C9  | N3  | C12 | N2  | 168.89(13)  | C40 | N5  | C39 | C38 | -1.20(17)   |
| C9  | C2  | C3  | C4  | -1.1(2)     | C40 | N5  | C41 | C42 | 53.29(17)   |
| C10 | N3  | C9  | C2  | -84.00(17)  | C40 | N6  | C34 | C32 | -85.99(19)  |
| C10 | N3  | C9  | C7  | 86.77(16)   | C40 | N6  | C34 | C35 | 98.57(17)   |
| C10 | N3  | C12 | Ru1 | 175.57(11)  | C40 | N6  | C38 | C39 | 1.09(17)    |
| C10 | N3  | C12 | N2  | -0.54(15)   | C41 | N5  | C39 | C38 | -176.43(13) |
| C11 | N2  | C12 | Ru1 | -176.29(9)  | C41 | N5  | C40 | Ru2 | 2.91(18)    |
| C11 | N2  | C12 | N3  | 0.47(15)    | C41 | N5  | C40 | N6  | 177.13(12)  |
| C11 | N2  | C13 | C14 | 130.47(14)  | C41 | C42 | C43 | C44 | 179.19(15)  |
| C12 | N2  | C11 | C10 | -0.23(17)   | C42 | N4  | C46 | C45 | -2.1(2)     |
| C12 | N2  | C13 | C14 | -57.67(18)  | C42 | C43 | C44 | C45 | -1.6(3)     |
| C12 | N3  | C9  | C2  | 107.29(17)  | C43 | C44 | C45 | C46 | 1.7(3)      |
| C12 | N3  | C9  | C7  | -81.93(18)  | C44 | C45 | C46 | N4  | 0.1(3)      |
| C12 | N3  | C10 | C11 | 0.42(16)    | C46 | N4  | C42 | C41 | -177.39(13) |
| C13 | N2  | C11 | C10 | 172.50(13)  | C46 | N4  | C42 | C43 | 2.2(2)      |
| C13 | N2  | C12 | Ru1 | 11.12(18)   | C47 | C48 | C49 | Ru2 | -121.73(14) |
| C13 | N2  | C12 | N3  | -172.11(12) | C47 | C48 | C49 | C50 | -175.47(13) |
| C13 | C14 | C15 | C16 | -175.46(13) | C47 | C48 | C51 | Ru2 | 122.88(14)  |
| C14 | N1  | C18 | C17 | -1.3(2)     | C47 | C48 | C51 | C52 | 176.01(14)  |
| C14 | C15 | C16 | C17 | -1.9(2)     | C48 | C49 | C50 | Ru2 | 54.32(13)   |
| C15 | C16 | C17 | C18 | 0.4(2)      | C48 | C49 | C50 | C53 | -1.0(2)     |
| C16 | C17 | C18 | N1  | 1.2(2)      | C48 | C51 | C52 | Ru2 | -51.91(13)  |
| C18 | N1  | C14 | C13 | 177.09(12)  | C48 | C51 | C52 | C53 | -0.1(2)     |
| C18 | N1  | C14 | C15 | -0.3(2)     | C49 | C48 | C51 | Ru2 | -55.80(12)  |
| C19 | C20 | C21 | Ru1 | 124.39(13)  | C49 | C48 | C51 | C52 | -2.7(2)     |
| C19 | C20 | C21 | C22 | 178.07(13)  | C49 | C50 | C53 | Ru2 | 54.42(12)   |
| C19 | C20 | C23 | Ru1 | -123.65(13) | C49 | C50 | C53 | C52 | -1.8(2)     |
| C19 | C20 | C23 | C24 | -179.13(13) | C49 | C50 | C53 | C54 | -175.13(13) |
| C20 | C21 | C22 | Ru1 | -52.68(12)  | C50 | C53 | C54 | C55 | 85.02(18)   |
| C20 | C21 | C22 | C25 | 1.0(2)      | C50 | C53 | C54 | C56 | -151.75(14) |
| C20 | C23 | C24 | Ru1 | 55.26(12)   | C51 | C48 | C49 | Ru2 | 56.95(12)   |
| C20 | C23 | C24 | C25 | 1.1(2)      | C51 | C48 | C49 | C50 | 3.2(2)      |
| C21 | C20 | C23 | Ru1 | 56.05(11)   | C51 | C52 | C53 | Ru2 | -52.52(13)  |
| C21 | C20 | C23 | C24 | 0.6(2)      | C51 | C52 | C53 | C50 | 2.3(2)      |
| C21 | C22 | C25 | Ru1 | -53.58(12)  | C51 | C52 | C53 | C54 | 175.57(14)  |
| C21 | C22 | C25 | C24 | 0.6(2)      | C52 | C53 | C54 | C55 | -88.12(18)  |
| C21 | C22 | C25 | C26 | 176.53(12)  | C52 | C53 | C54 | C56 | 35.1(2)     |
| C22 | C25 | C26 | C27 | -94.53(15)  | O1  | S1  | C58 | F1  | -172.92(13) |
| C22 | C25 | C26 | C28 | 141.78(13)  | O1  | S1  | C58 | F2  | 67.25(16)   |
| C23 | C20 | C21 | Ru1 | -55.31(11)  | O1  | S1  | C58 | F3  | -52.88(14)  |
| C23 | C20 | C21 | C22 | -1.6(2)     | O2  | S1  | C58 | F1  | 66.42(15)   |
| C23 | C24 | C25 | Ru1 | 52.77(11)   | O2  | S1  | C58 | F2  | -53.40(16)  |
| C23 | C24 | C25 | C22 | -1.70(19)   | O2  | S1  | C58 | F3  | -173.54(12) |
| C23 | C24 | C25 | C26 | -177.42(12) | O3  | S1  | C58 | F1  | -52.68(15)  |
| C24 | C25 | C26 | C27 | 81.16(16)   | O3  | S1  | C58 | F2  | -172.50(14) |
| C24 | C25 | C26 | C28 | -42.52(19)  | O3  | S1  | C58 | F3  | 67.36(14)   |
| Ru2 | N4  | C42 | C41 | 4.99(18)    | O4  | S2  | C57 | F4  | -177.22(10) |
| Ru2 | N4  | C42 | C43 | -175.45(11) | O4  | S2  | C57 | F5  | -57.52(12)  |
| Ru2 | N4  | C46 | C45 | 175.69(13)  | O4  | S2  | C57 | F6  | 62.72(12)   |
| Ru2 | C48 | C49 | C50 | -53.74(12)  | O5  | S2  | C57 | F4  | 61.82(11)   |
| Ru2 | C48 | C51 | C52 | 53.13(13)   | O5  | S2  | C57 | F5  | -178.48(11) |
| Ru2 | C49 | C50 | C53 | -55.34(12)  | O5  | S2  | C57 | F6  | -58.24(12)  |
| Ru2 | C50 | C53 | C52 | -56.19(12)  | O6  | S2  | C57 | F4  | -57.55(11)  |
| Ru2 | C50 | C53 | C54 | 130.46(13)  | O6  | S2  | C57 | F5  | 62.15(12)   |
| Ru2 | C51 | C52 | C53 | 51.82(13)   | O6  | S2  | C57 | F6  | -177.60(10) |

**Table S17: Hydrogen Atom Coordinates ( $\text{\AA}\times 10^4$ ) and Isotropic Displacement Parameters ( $\text{\AA}^2\times 10^3$ ) for Ruthenium CN-Mesityl.**

| Atom | x       | y        | z       | U(eq) |
|------|---------|----------|---------|-------|
| H1A  | 4730.98 | -1264.01 | 4989.58 | 30    |
| H1B  | 4460.24 | -334.31  | 4693.37 | 30    |
| H1C  | 4602.19 | -1356.74 | 4449.52 | 30    |
| H3   | 3560.2  | -2284.19 | 5273.37 | 22    |
| H5A  | 2382.79 | -3415.65 | 5544.29 | 44    |
| H5B  | 1318.91 | -3220.17 | 5427.34 | 44    |
| H5C  | 1824.9  | -2610.36 | 5819.36 | 44    |
| H6   | 879.48  | -1806.66 | 4975.5  | 22    |
| H8A  | 655.15  | -844.21  | 4160.31 | 26    |
| H8B  | 1261.96 | 119.63   | 4190.86 | 26    |
| H8C  | 565.57  | -145.34  | 4591.78 | 26    |
| H10  | 3025.69 | 1078.87  | 4736.41 | 19    |
| H11  | 3190.78 | 2221.62  | 4092.7  | 19    |
| H13A | 3155.53 | 2110.17  | 3250.57 | 16    |
| H13B | 2422.47 | 1307.86  | 3096.28 | 16    |
| H15  | 4254.55 | 2255.68  | 2677.24 | 17    |
| H16  | 5253.97 | 1561.4   | 2140.56 | 20    |
| H17  | 5346.73 | -131.97  | 2097.26 | 19    |
| H18  | 4447.6  | -1073.03 | 2573.16 | 17    |
| H19A | 1162.26 | 428.68   | 2683.53 | 27    |
| H19B | 1145.64 | -231.61  | 2236.19 | 27    |
| H19C | 2071.64 | 320.06   | 2382.87 | 27    |
| H21  | 2681.69 | -1474.16 | 2295.89 | 17    |
| H22  | 3192.54 | -2780.39 | 2727.73 | 16    |
| H23  | 1042.42 | -593.7   | 3344.15 | 15    |
| H24  | 1523.61 | -1948.16 | 3776.2  | 15    |
| H26  | 3311.73 | -3629.36 | 3423.26 | 17    |
| H27A | 1415.6  | -3986.14 | 3636.03 | 29    |
| H27B | 2203.75 | -4792.68 | 3607.77 | 29    |
| H27C | 1867.35 | -4245.14 | 3155.97 | 29    |
| H28A | 3383.19 | -2756.23 | 4112.26 | 30    |
| H28B | 3105.27 | -3856.17 | 4207.41 | 30    |
| H28C | 2333.27 | -3030.28 | 4215.4  | 30    |
| H29A | 8676.37 | 4680.29  | 5359.02 | 44    |
| H29B | 8178.27 | 5550.79  | 5617.83 | 44    |
| H29C | 9175.18 | 5708.2   | 5400.28 | 44    |
| H31  | 9163.48 | 5244.09  | 4509.78 | 23    |
| H33A | 9307.73 | 5664.79  | 3682.87 | 31    |
| H33B | 8389.27 | 5949.56  | 3408.01 | 31    |
| H33C | 8524.25 | 4871.22  | 3593.35 | 31    |
| H36A | 5780.98 | 7236.45  | 4248.9  | 33    |
| H36B | 5768.71 | 7176.63  | 4793.07 | 33    |
| H36C | 5432.45 | 6273.3   | 4494.81 | 33    |
| H37  | 6941.25 | 6191.08  | 5195.4  | 24    |
| H38  | 6011.3  | 5513.51  | 3547.28 | 22    |
| H39  | 5540.42 | 6475.81  | 2874.92 | 21    |
| H41A | 6128.11 | 8830.76  | 2942.88 | 17    |
| H41B | 6026.16 | 8076.9   | 2531.53 | 17    |
| H43  | 7038.25 | 8413.67  | 1939.59 | 24    |
| H44  | 8489.47 | 8896.62  | 1675.42 | 32    |
| H45  | 9608.38 | 9404.33  | 2205.51 | 30    |
| H46  | 9283.77 | 9347.83  | 2977.39 | 23    |
| H47A | 8328.91 | 7876.14  | 4772.56 | 29    |
| H47B | 8817.48 | 8835.98  | 4959.26 | 29    |
| H47C | 9253.75 | 8260.18  | 4540.53 | 29    |
| H49  | 6868.81 | 8394.7   | 4476.64 | 19    |
| H50  | 6004.34 | 9248.41  | 3920.01 | 19    |
| H51  | 9157.43 | 9957.66  | 4144.45 | 19    |
| H52  | 8307.62 | 10819.48 | 3604.01 | 19    |
| H54  | 5952.42 | 10295.88 | 3257.85 | 25    |
| H55A | 5711.29 | 11290.18 | 3894.98 | 55    |
| H55B | 5685.38 | 11944.82 | 3445.87 | 55    |
| H55C | 6583.48 | 11940.9  | 3766.64 | 55    |

**Table S17: Hydrogen Atom Coordinates ( $\text{\AA}\times 10^4$ ) and Isotropic Displacement Parameters ( $\text{\AA}^2\times 10^3$ ) for Ruthenium CN-Mesityl.**

| <b>Atom</b> | <b>x</b> | <b>y</b> | <b>z</b> | <b>U(eq)</b> |  |
|-------------|----------|----------|----------|--------------|--|
| H56A        | 7527.41  | 11459.73 | 3050.34  | 39           |  |
| H56B        | 6578.92  | 11487.82 | 2767.74  | 39           |  |
| H56C        | 7200.03  | 10532.21 | 2766.63  | 39           |  |

### Crystal Structure of 2

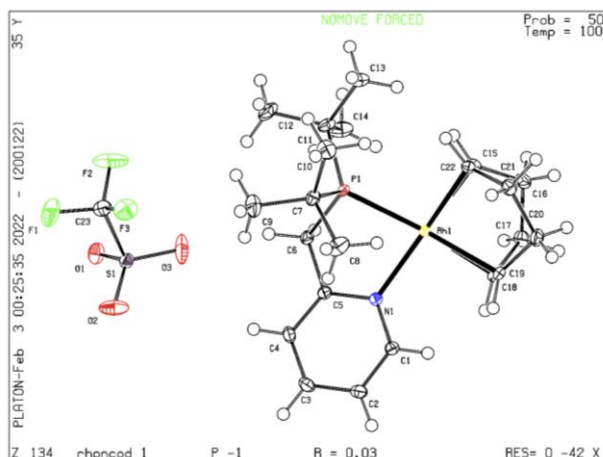

**Figure S127:** Molecular structure of **2** shown with 50% probability ellipsoids.

A clear yellowish prism-like crystal of,  $C_{23}H_{36}F_3NO_3PRhS$ . approximate dimensions 0.329 mm x 0.188 mm x 0.138 mm was used for X-ray crystallographic analysis grown from layering dichloromethane and toluene. The X-ray intensity data was collected on a XtaLAB Synergy, Dualflex, HyPix diffractometer using a Mo  $K\alpha$  fine-focus tube ( $\lambda = 0.71073$ ) and kept at 100.00(10) K during data acquisition. The crystal was mounted on a MiTiGen 50um.

Frames were integrated using Rigaku CrysAlisPro software. The integration of the data using a monoclinic crystal system resulted in 41340 reflections to a maximum  $\theta$  angle of  $33.241^\circ$  ( $0.75 \text{ \AA}$  resolution), of which 8380 were independent (completeness = 87.4 %,  $R_{int} = 0.0735$ ,  $R_{\sigma} = 0.0437$ ). The final cell constants are  $a = 8.8927(3) \text{ \AA}$ ,  $b = 10.3448(3) \text{ \AA}$ ,  $c = 14.8521 \text{ \AA}$ ,  $\alpha = 109.951^\circ$ ,  $\beta = 100.254(2)^\circ$ ,  $\gamma = 94.693(2)^\circ$ , volume =  $1248.68(3) \text{ \AA}^3$ , are based upon the refinement of the. Data was corrected for absorption effects using the multi-scan method. The ratio of minimum to maximum apparent transmission was 0.392.

The structure was solved using olex2.solve<sup>4</sup> structure solution program using Charge Flipping and refined with the SHELXL<sup>5</sup> refinement package using Least Squares minimization. The space group P-1 was used with  $Z = 2$  for the formula unit,  $C_{23}H_{36}F_3NO_3PRhS$ . The final  $R_1 = 3.24\%$  and  $wR_2 = 8.66\%$  ( $R(I > 2\sigma(I))$ ) and for all data  $R_1 = 3.53\%$   $wR_2 = 8.84\%$ . The goodness-of-fit was 1.083. The largest peak in the final difference electron density synthesis was  $0.78 \text{ e-/\AA}^3$  and the largest hole was  $-1.04 \text{ e-/\AA}^3$ . Based on the final model, the calculated density was  $1.589 \text{ g/cm}^3$  and  $F(000)$ , 616.0.

**Table S18: Crystal data and structure refinement for RhPNCOD\_1.**

|                                               |                                                                    |
|-----------------------------------------------|--------------------------------------------------------------------|
| Identification code                           | RhPNCOD_1                                                          |
| Empirical formula                             | $C_{23}H_{36}F_3NO_3PRhS$                                          |
| Formula weight                                | 597.47                                                             |
| Temperature/K                                 | 100.00(10)                                                         |
| Crystal system                                | triclinic                                                          |
| Space group                                   | P-1                                                                |
| $a/\text{\AA}$                                | 8.8927(3)                                                          |
| $b/\text{\AA}$                                | 10.3448(3)                                                         |
| $c/\text{\AA}$                                | 14.8521(3)                                                         |
| $\alpha/^\circ$                               | 109.951(2)                                                         |
| $\beta/^\circ$                                | 100.254(2)                                                         |
| $\gamma/^\circ$                               | 94.693(2)                                                          |
| Volume/ $\text{\AA}^3$                        | 1248.68(6)                                                         |
| Z                                             | 2                                                                  |
| $\rho_{\text{calc}}/\text{g/cm}^3$            | 1.589                                                              |
| $\mu/\text{mm}^{-1}$                          | 0.879                                                              |
| $F(000)$                                      | 616.0                                                              |
| Crystal size/ $\text{mm}^3$                   | $0.329 \times 0.188 \times 0.138$                                  |
| Radiation                                     | Mo $K\alpha$ ( $\lambda = 0.71073$ )                               |
| $2\theta$ range for data collection/ $^\circ$ | 4.994 to 66.482                                                    |
| Index ranges                                  | $-12 \leq h \leq 13$ , $-14 \leq k \leq 15$ , $-22 \leq l \leq 21$ |
| Reflections collected                         | 41340                                                              |
| Independent reflections                       | 8380 [ $R_{int} = 0.0735$ , $R_{\sigma} = 0.0437$ ]                |
| Data/restraints/parameters                    | 8380/0/304                                                         |
| Goodness-of-fit on $F^2$                      | 1.083                                                              |
| Final R indexes [ $I > 2\sigma(I)$ ]          | $R_1 = 0.0324$ , $wR_2 = 0.0866$                                   |
| Final R indexes [all data]                    | $R_1 = 0.0353$ , $wR_2 = 0.0884$                                   |
| Largest diff. peak/hole / $\text{e-/\AA}^3$   | 0.78/-1.04                                                         |

**Table S19: Fractional Atomic Coordinates ( $\times 10^4$ ) and Equivalent Isotropic Displacement Parameters ( $\text{\AA}^2 \times 10^3$ ) for RHPNCOD\_1.  $U_{eq}$  is defined as 1/3 of the trace of the orthogonalised  $U_{ij}$  tensor.**

| Atom | x           | y           | z          | $U_{eq}$ |
|------|-------------|-------------|------------|----------|
| Rh1  | 4686.0(2)   | 8477.9(2)   | 6871.0(2)  | 9.28(5)  |
| P1   | 5564.5(5)   | 7182.7(4)   | 7798.9(3)  | 10.32(8) |
| N1   | 6108.1(15)  | 7317.4(13)  | 5964.9(9)  | 11.6(2)  |
| C20  | 4133(2)     | 11471.0(17) | 6958.4(12) | 17.0(3)  |
| C9   | 8603(2)     | 6858(2)     | 8665.9(14) | 24.7(4)  |
| C14  | 2908(2)     | 5493.7(19)  | 7658.3(13) | 23.2(4)  |
| C10  | 7488(2)     | 8925.3(19)  | 9603.8(12) | 21.9(3)  |
| C11  | 4337(2)     | 6383.2(16)  | 8441.1(11) | 15.6(3)  |
| C18  | 3480.2(18)  | 9013.1(16)  | 5626.5(11) | 12.9(3)  |
| C15  | 2629.2(18)  | 9019.3(16)  | 7386.4(11) | 13.6(3)  |
| C13  | 3772(2)     | 7500.6(18)  | 9242.7(12) | 19.4(3)  |
| C22  | 3917.4(18)  | 9997.0(16)  | 8008.9(11) | 13.7(3)  |
| C16  | 1412.8(19)  | 9288.3(18)  | 6639.6(12) | 17.4(3)  |
| C6   | 5815.1(19)  | 5649.7(15)  | 6776.0(11) | 13.2(3)  |
| C17  | 1767.1(18)  | 8823.9(18)  | 5608.5(12) | 16.7(3)  |
| C4   | 7574.4(19)  | 5418.4(17)  | 5591.3(12) | 16.4(3)  |
| C3   | 8227.7(19)  | 5926.0(19)  | 4970.8(12) | 17.8(3)  |
| C8   | 8359(2)     | 8839(2)     | 8088.8(13) | 23.7(4)  |
| C1   | 6763.0(18)  | 7792.7(16)  | 5358.1(11) | 13.4(3)  |
| C21  | 4359(2)     | 11434.6(16) | 8005.0(12) | 17.3(3)  |
| C12  | 5174(3)     | 5441.5(19)  | 8895.8(14) | 25.6(4)  |
| C2   | 7821.8(18)  | 7134.5(18)  | 4856.8(11) | 15.8(3)  |
| C19  | 4535.4(18)  | 10167.8(16) | 6245.8(11) | 13.3(3)  |
| C5   | 6525.7(18)  | 6140.0(16)  | 6081.4(10) | 12.6(3)  |
| C7   | 7581.4(19)  | 7951.5(16)  | 8575.1(11) | 14.5(3)  |
| S1   | 8949.9(5)   | 2415.6(4)   | 7109.0(3)  | 14.64(8) |
| F1   | 10631.1(17) | 2134.3(14)  | 8656.2(9)  | 37.7(3)  |
| F2   | 8432.5(17)  | 2734.4(18)  | 8860.1(9)  | 46.1(4)  |
| F3   | 10270.1(15) | 4242.0(12)  | 8874.6(8)  | 30.3(3)  |
| O1   | 8315.2(15)  | 964.3(13)   | 6780.8(9)  | 21.0(2)  |
| O2   | 10371.4(17) | 2694.2(16)  | 6820.5(10) | 30.9(3)  |
| O3   | 7830(2)     | 3313.6(16)  | 7013.6(12) | 36.8(4)  |
| C23  | 9601(2)     | 2911.5(19)  | 8440.2(13) | 20.3(3)  |

**Table S20: Anisotropic Displacement Parameters ( $\text{\AA}^2 \times 10^3$ ) for RHPNCOD\_1. The Anisotropic displacement factor exponent takes the form:  $-2\pi^2[h^2a^*U_{11}+2hka^*b^*U_{12}+\dots]$ .**

| Atom | $U_{11}$  | $U_{22}$ | $U_{33}$ | $U_{23}$ | $U_{13}$ | $U_{12}$ |
|------|-----------|----------|----------|----------|----------|----------|
| Rh1  | 10.52(7)  | 9.76(7)  | 9.07(7)  | 4.53(4)  | 3.09(4)  | 2.89(4)  |
| P1   | 13.81(18) | 8.89(16) | 9.02(17) | 4.33(13) | 2.36(13) | 1.47(13) |
| N1   | 12.9(6)   | 12.5(6)  | 10.1(6)  | 4.5(4)   | 2.8(4)   | 3.3(4)   |
| C20  | 20.8(8)   | 13.3(7)  | 18.8(7)  | 7.8(6)   | 3.7(6)   | 5.2(6)   |
| C9   | 23.0(9)   | 22.2(8)  | 25.8(9)  | 7.4(7)   | -1.2(7)  | 7.5(7)   |
| C14  | 25.8(9)   | 20.8(8)  | 18.9(8)  | 3.8(6)   | 7.3(6)   | -8.1(7)  |
| C10  | 21.8(8)   | 22.1(8)  | 15.5(7)  | 1.4(6)   | -0.6(6)  | 2.9(6)   |
| C11  | 22.2(8)   | 12.6(6)  | 12.8(7)  | 5.7(5)   | 5.2(5)   | -1.4(6)  |
| C18  | 14.2(7)   | 15.3(7)  | 11.6(6)  | 7.5(5)   | 2.9(5)   | 4.5(5)   |
| C15  | 13.4(7)   | 15.4(7)  | 13.7(7)  | 5.1(5)   | 6.3(5)   | 4.3(5)   |
| C13  | 24.6(8)   | 19.8(8)  | 13.8(7)  | 5.0(6)   | 8.2(6)   | 0.1(6)   |
| C22  | 16.9(7)   | 14.6(7)  | 10.7(6)  | 4.0(5)   | 5.2(5)   | 5.5(5)   |
| C16  | 12.4(7)   | 23.6(8)  | 16.7(7)  | 6.9(6)   | 3.9(5)   | 5.6(6)   |
| C6   | 18.8(7)   | 9.8(6)   | 12.0(6)  | 4.3(5)   | 4.3(5)   | 3.2(5)   |
| C17  | 11.9(7)   | 22.0(8)  | 15.9(7)  | 7.2(6)   | 0.8(5)   | 4.2(6)   |
| C4   | 18.0(7)   | 16.4(7)  | 15.4(7)  | 5.2(5)   | 3.4(5)   | 9.1(6)   |
| C3   | 15.5(7)   | 24.8(8)  | 13.4(7)  | 5.2(6)   | 5.1(5)   | 8.6(6)   |
| C8   | 18.9(8)   | 29.1(9)  | 21.4(8)  | 12.5(7)  | -2.1(6)  | -6.8(7)  |
| C1   | 13.2(7)   | 15.9(7)  | 12.5(7)  | 6.4(5)   | 3.4(5)   | 3.2(5)   |
| C21  | 22.1(8)   | 12.7(7)  | 16.3(7)  | 3.6(5)   | 4.7(6)   | 4.3(6)   |
| C12  | 43.3(11)  | 17.9(8)  | 22.2(8)  | 13.6(7)  | 10.9(7)  | 3.8(7)   |
| C2   | 12.2(7)   | 23.3(8)  | 12.2(7)  | 6.3(6)   | 3.7(5)   | 3.1(6)   |
| C19  | 15.8(7)   | 14.6(7)  | 13.7(7)  | 9.2(5)   | 4.3(5)   | 5.1(5)   |
| C5   | 14.2(7)   | 14.0(7)  | 9.4(6)   | 4.3(5)   | 1.8(5)   | 3.3(5)   |

**Table S20: Anisotropic Displacement Parameters ( $\text{\AA}^2 \times 10^3$ ) for RhPNCOD\_1. The Anisotropic displacement factor exponent takes the form:  $-2\pi^2[h^2a^*U_{11}+2hka^*b^*U_{12}+\dots]$ .**

| Atom | $U_{11}$  | $U_{22}$  | $U_{33}$  | $U_{23}$ | $U_{13}$ | $U_{12}$ |
|------|-----------|-----------|-----------|----------|----------|----------|
| C7   | 15.2(7)   | 14.5(7)   | 12.1(7)   | 5.0(5)   | -0.5(5)  | 1.3(5)   |
| S1   | 16.70(18) | 13.14(17) | 15.36(18) | 6.57(13) | 3.73(13) | 2.65(13) |
| F1   | 43.2(8)   | 36.9(7)   | 30.6(7)   | 16.1(5)  | -8.1(5)  | 11.9(6)  |
| F2   | 36.1(7)   | 73.6(11)  | 25.9(6)   | 13.7(6)  | 16.8(5)  | -9.7(7)  |
| F3   | 41.2(7)   | 22.3(5)   | 20.3(5)   | 1.2(4)   | 4.7(5)   | -0.6(5)  |
| O1   | 18.9(6)   | 15.4(5)   | 26.5(6)   | 8.3(5)   | -0.3(5)  | -0.2(4)  |
| O2   | 30.3(7)   | 35.0(8)   | 20.8(6)   | 2.9(5)   | 11.7(5)  | -13.0(6) |
| O3   | 45.3(9)   | 25.3(7)   | 35.8(8)   | 9.6(6)   | -5.2(7)  | 20.8(7)  |
| C23  | 21.1(8)   | 23.3(8)   | 18.5(8)   | 9.4(6)   | 6.0(6)   | 2.5(6)   |

**Table S21: Bond Lengths for RhPNCOD\_1.**

| Atom Atom | Length/ $\text{\AA}$ | Atom Atom | Length/ $\text{\AA}$ |
|-----------|----------------------|-----------|----------------------|
| Rh1 P1    | 2.3136(4)            | C18 C19   | 1.383(2)             |
| Rh1 N1    | 2.1456(13)           | C15 C22   | 1.409(2)             |
| Rh1 C18   | 2.2277(15)           | C15 C16   | 1.520(2)             |
| Rh1 C15   | 2.1490(15)           | C22 C21   | 1.509(2)             |
| Rh1 C22   | 2.1371(15)           | C16 C17   | 1.539(2)             |
| Rh1 C19   | 2.2445(15)           | C6 C5     | 1.503(2)             |
| P1 C11    | 1.8830(16)           | C4 C3     | 1.390(2)             |
| P1 C6     | 1.8458(15)           | C4 C5     | 1.393(2)             |
| P1 C7     | 1.8930(16)           | C3 C2     | 1.385(2)             |
| N1 C1     | 1.3548(19)           | C8 C7     | 1.539(2)             |
| N1 C5     | 1.359(2)             | C1 C2     | 1.383(2)             |
| C20 C21   | 1.545(2)             | S1 O1     | 1.4402(13)           |
| C20 C19   | 1.519(2)             | S1 O2     | 1.4429(14)           |
| C9 C7     | 1.533(2)             | S1 O3     | 1.4373(15)           |
| C14 C11   | 1.538(2)             | S1 C23    | 1.8327(18)           |
| C10 C7    | 1.538(2)             | F1 C23    | 1.334(2)             |
| C11 C13   | 1.541(2)             | F2 C23    | 1.334(2)             |
| C11 C12   | 1.532(3)             | F3 C23    | 1.337(2)             |
| C18 C17   | 1.514(2)             |           |                      |

**Table S22: Bond Angles for RhPNCOD\_1.**

| Atom Atom Atom | Angle/ $^\circ$ | Atom Atom Atom | Angle/ $^\circ$ |
|----------------|-----------------|----------------|-----------------|
| N1 Rh1 P1      | 80.92(4)        | C16 C15 Rh1    | 113.50(10)      |
| N1 Rh1 C18     | 90.48(5)        | C15 C22 Rh1    | 71.27(9)        |
| N1 Rh1 C15     | 158.59(6)       | C15 C22 C21    | 125.89(14)      |
| N1 Rh1 C19     | 97.32(5)        | C21 C22 Rh1    | 110.28(10)      |
| C18 Rh1 P1     | 160.72(4)       | C15 C16 C17    | 112.75(13)      |
| C18 Rh1 C19    | 36.03(6)        | C5 C6 P1       | 108.78(10)      |
| C15 Rh1 P1     | 100.80(4)       | C18 C17 C16    | 113.26(13)      |
| C15 Rh1 C18    | 81.09(6)        | C3 C4 C5       | 119.03(15)      |
| C15 Rh1 C19    | 87.41(6)        | C2 C3 C4       | 119.24(15)      |
| C22 Rh1 P1     | 96.03(4)        | N1 C1 C2       | 123.08(15)      |
| C22 Rh1 N1     | 163.01(6)       | C22 C21 C20    | 112.87(13)      |
| C22 Rh1 C18    | 97.03(6)        | C1 C2 C3       | 118.79(15)      |
| C22 Rh1 C15    | 38.38(6)        | C20 C19 Rh1    | 111.51(10)      |
| C22 Rh1 C19    | 80.38(6)        | C18 C19 Rh1    | 71.32(9)        |
| C19 Rh1 P1     | 161.96(4)       | C18 C19 C20    | 125.07(14)      |
| C11 P1 Rh1     | 124.44(6)       | N1 C5 C6       | 116.91(13)      |
| C11 P1 C7      | 112.03(7)       | N1 C5 C4       | 122.10(14)      |
| C6 P1 Rh1      | 97.25(5)        | C4 C5 C6       | 120.99(14)      |
| C6 P1 C11      | 102.50(7)       | C9 C7 P1       | 113.80(12)      |
| C6 P1 C7       | 105.26(7)       | C9 C7 C10      | 109.65(14)      |
| C7 P1 Rh1      | 111.75(5)       | C9 C7 C8       | 108.07(15)      |
| C1 N1 Rh1      | 122.56(10)      | C10 C7 P1      | 109.89(12)      |
| C1 N1 C5       | 117.76(13)      | C10 C7 C8      | 107.61(14)      |
| C5 N1 Rh1      | 119.22(10)      | C8 C7 P1       | 107.61(11)      |
| C19 C20 C21    | 111.46(13)      | O1 S1 O2       | 114.86(9)       |

**Table S22: Bond Angles for RhPNCOD\_1.**

| Atom Atom Atom | Angle/°    | Atom Atom Atom | Angle/°    |
|----------------|------------|----------------|------------|
| C14 C11 P1     | 106.70(11) | O1 S1 C23      | 103.57(8)  |
| C14 C11 C13    | 107.89(15) | O2 S1 C23      | 102.09(8)  |
| C13 C11 P1     | 111.72(11) | O3 S1 O1       | 114.60(9)  |
| C12 C11 P1     | 112.72(13) | O3 S1 O2       | 115.63(11) |
| C12 C11 C14    | 108.48(14) | O3 S1 C23      | 103.60(9)  |
| C12 C11 C13    | 109.15(13) | F1 C23 S1      | 111.16(13) |
| C17 C18 Rh1    | 107.27(10) | F1 C23 F2      | 106.66(16) |
| C19 C18 Rh1    | 72.65(9)   | F1 C23 F3      | 107.34(15) |
| C19 C18 C17    | 124.88(14) | F2 C23 S1      | 111.73(13) |
| C22 C15 Rh1    | 70.35(9)   | F2 C23 F3      | 107.66(15) |
| C22 C15 C16    | 124.74(15) | F3 C23 S1      | 112.02(12) |

**Table S23: Torsion Angles for RhPNCOD\_1.**

| A B C D         | Angle/°     | A B C D         | Angle/°     |
|-----------------|-------------|-----------------|-------------|
| Rh1 P1 C11 C14  | 54.16(13)   | C6 P1 C7 C9     | -38.42(14)  |
| Rh1 P1 C11 C13  | -63.53(13)  | C6 P1 C7 C10    | -161.82(11) |
| Rh1 P1 C11 C12  | 173.14(10)  | C6 P1 C7 C8     | 81.29(13)   |
| Rh1 P1 C6 C5    | 41.80(11)   | C17 C18 C19 Rh1 | 99.29(14)   |
| Rh1 P1 C7 C9    | -142.88(11) | C17 C18 C19 C20 | -4.3(2)     |
| Rh1 P1 C7 C10   | 93.72(11)   | C4 C3 C2 C1     | -0.7(2)     |
| Rh1 P1 C7 C8    | -23.17(13)  | C3 C4 C5 N1     | 0.7(2)      |
| Rh1 N1 C1 C2    | 172.31(11)  | C3 C4 C5 C6     | -178.68(15) |
| Rh1 N1 C5 C6    | 6.20(18)    | C1 N1 C5 C6     | 178.58(13)  |
| Rh1 N1 C5 C4    | -173.20(12) | C1 N1 C5 C4     | -0.8(2)     |
| Rh1 C18 C17 C16 | 38.02(16)   | C21 C20 C19 Rh1 | 15.09(16)   |
| Rh1 C18 C19 C20 | -103.63(14) | C21 C20 C19 C18 | 96.82(18)   |
| Rh1 C15 C22 C21 | 101.91(15)  | C19 C20 C21 C22 | -36.70(19)  |
| Rh1 C15 C16 C17 | 11.92(17)   | C19 C18 C17 C16 | -42.5(2)    |
| Rh1 C22 C21 C20 | 40.70(17)   | C5 N1 C1 C2     | 0.2(2)      |
| P1 C6 C5 N1     | -34.59(17)  | C5 C4 C3 C2     | 0.1(2)      |
| P1 C6 C5 C4     | 144.82(13)  | C7 P1 C11 C14   | -166.19(12) |
| N1 C1 C2 C3     | 0.5(2)      | C7 P1 C11 C13   | 76.12(13)   |
| C11 P1 C6 C5    | 169.55(11)  | C7 P1 C11 C12   | -47.22(14)  |
| C11 P1 C7 C9    | 72.21(14)   | C7 P1 C6 C5     | -73.15(12)  |
| C11 P1 C7 C10   | -51.18(13)  | O1 S1 C23 F1    | 58.35(14)   |
| C11 P1 C7 C8    | -168.07(12) | O1 S1 C23 F2    | -60.68(16)  |
| C15 C22 C21 C20 | -40.4(2)    | O1 S1 C23 F3    | 178.44(12)  |
| C15 C16 C17 C18 | -34.1(2)    | O2 S1 C23 F1    | -61.26(15)  |
| C22 C15 C16 C17 | 93.60(18)   | O2 S1 C23 F2    | 179.72(15)  |
| C16 C15 C22 Rh1 | -105.52(14) | O2 S1 C23 F3    | 58.83(15)   |
| C16 C15 C22 C21 | -3.6(2)     | O3 S1 C23 F1    | 178.28(14)  |
| C6 P1 C11 C14   | -53.83(13)  | O3 S1 C23 F2    | 59.26(17)   |
| C6 P1 C11 C13   | -171.52(12) | O3 S1 C23 F3    | -61.63(15)  |
| C6 P1 C11 C12   | 65.15(13)   |                 |             |

**Table S24: Hydrogen Atom Coordinates ( $\text{\AA} \times 10^4$ ) and Isotropic Displacement Parameters ( $\text{\AA}^2 \times 10^3$ ) for RhPNCOD\_1.**

| Atom | x       | y        | z       | U(eq) |
|------|---------|----------|---------|-------|
| H20A | 3043.08 | 11555.22 | 6727.33 | 20    |
| H20B | 4796.73 | 12298.31 | 6974.34 | 20    |
| H9A  | 9640.48 | 7325.53  | 9048.45 | 37    |
| H9B  | 8672.09 | 6247.5   | 8009.71 | 37    |
| H9C  | 8149.73 | 6303.77  | 8997.69 | 37    |
| H14A | 3198.11 | 4631.72  | 7243.48 | 35    |
| H14B | 2506.8  | 6015.17  | 7251.62 | 35    |
| H14C | 2108.97 | 5267.39  | 7981.12 | 35    |
| H10A | 7093.25 | 8374.8   | 9957.28 | 33    |
| H10B | 6791.08 | 9591.68  | 9542.82 | 33    |
| H10C | 8521.38 | 9430.14  | 9966.86 | 33    |
| H18  | 3752.17 | 8521.48  | 4983.52 | 15    |



**Table S24: Hydrogen Atom Coordinates ( $\text{\AA}\times 10^4$ ) and Isotropic Displacement Parameters ( $\text{\AA}^2\times 10^3$ ) for RhPNCOD\_1.**

| Atom | x       | y        | z       | U(eq) |
|------|---------|----------|---------|-------|
| H15  | 2209.26 | 8381.24  | 7689.44 | 16    |
| H13A | 4665.29 | 8111.54  | 9734.43 | 29    |
| H13B | 3135.74 | 7048.22  | 9558.71 | 29    |
| H13C | 3154.78 | 8052.44  | 8944.49 | 29    |
| H22  | 4226.68 | 9922.38  | 8668.31 | 16    |
| H16A | 1346.43 | 10295.45 | 6865.33 | 21    |
| H16B | 393.64  | 8785.36  | 6601.99 | 21    |
| H6A  | 6494.2  | 5084.45  | 7032.86 | 16    |
| H6B  | 4800.25 | 5063.21  | 6427.71 | 16    |
| H17A | 1327.22 | 7829.82  | 5250.79 | 20    |
| H17B | 1250.82 | 9365.2   | 5242.9  | 20    |
| H4   | 7839.15 | 4591.77  | 5679.7  | 20    |
| H3   | 8944.13 | 5449.37  | 4629    | 21    |
| H8A  | 9363.03 | 9332.75  | 8512.38 | 36    |
| H8B  | 7698.2  | 9514.69  | 7992.6  | 36    |
| H8C  | 8510.34 | 8233.02  | 7451.81 | 36    |
| H1   | 6481.73 | 8616.77  | 5272.94 | 16    |
| H21A | 5457.16 | 11777.13 | 8346.16 | 21    |
| H21B | 3725.29 | 12072.46 | 8375.85 | 21    |
| H12A | 5610.2  | 4777.72  | 8402.5  | 38    |
| H12B | 4438.5  | 4932.79  | 9122.26 | 38    |
| H12C | 6007.85 | 6011.57  | 9453.59 | 38    |
| H2   | 8262.7  | 7504.56  | 4441.91 | 19    |
| H19  | 5446.48 | 10347.33 | 5972.27 | 16    |

## References

- (1) Celaje, J. J. A.; Lu, Z.; Kedzie, E. A.; Terrile, N. J.; Lo, J. N.; Williams, T. J.. *Nat Commun* **2016**, *7* (1), 11308.
- (2) Anaby, A.; Schelwies, M.; Schwaben, J.; Rominger, F.; Hashmi, A. S. K.; Schaub, T. *Organometallics* **2018**, *37* (13), 2193–2201.
- (3) Sharninghausen, L. S.; Crabtree, R. H. *Israel Journal of Chemistry* **2017**, *57* (10–11), 937–944.
- (4) Bourhis, L. J.; Dolomanov, O. V.; Gildea, R. J.; Howard, J. A. K.; Puschmann, H. *Acta Crystallogr A Found Adv* **2015**, *71* (Pt 1), 59–75.
- (5) Sheldrick, G. M. *Acta Cryst C* **2015**, *71* (1), 3–8.
